# Supplementary material for: Genome-Wide Association Study on the Risk of Contracting Human Papillomavirus and Developing Chronic Infections in Women Living with HIV in Rwanda
Source: Research Square preprint supplement (doi:10.21203/rs.3.rs-7393970/v1), 2025-09-09
Supplement: Supplementary file 1 [file 395aecb6a43254b9f7973c9f.pdf]

## Supplementary figures

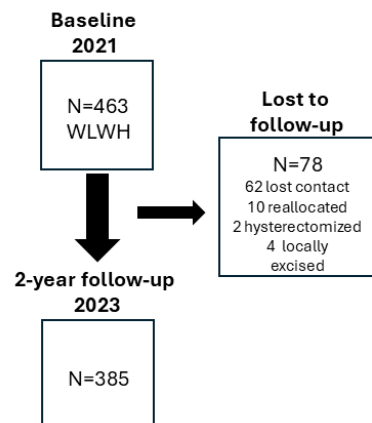

Supplementary figure 1. Study flow chart. WLWH=women living with HIV.

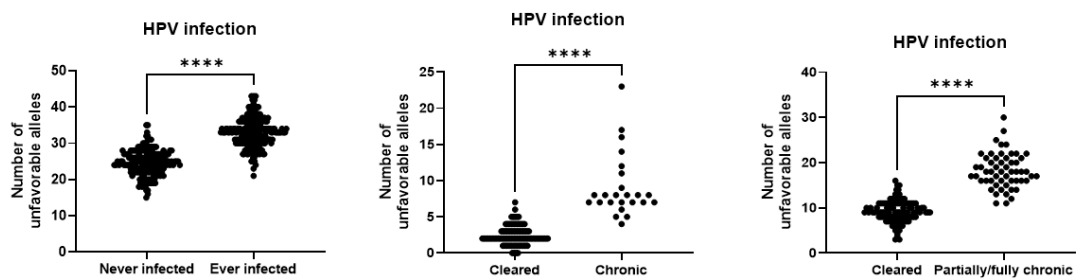

Supplementary figure 2. Expression of unfavourable alleles at the top 30 SNPs. Heterozygosity is considered  $n=1$  and homozygosity  $n=2$ . \*\*\*\* $<0.0001$ .
