# Supplementary material for: Genome-Wide Association Study on the Risk of Contracting Human Papillomavirus and Developing Chronic Infections in Women Living with HIV in Rwanda
Source: Research Square preprint supplement (doi:10.21203/rs.3.rs-7393970/v1), 2025-09-09
Supplement: Supplementary file 2 [file 33640c0d014704007789a533.docx]

*Real-time quantitative PCR*

Nucleic acids were extracted from 200 µl of each specimen using the DNA Isolation I kit and the MagNA Pure LC instrument (Roche Molecular, Mannheim, Germany). The extracted nucleic acids were eluted to a volume of 100 µl, and 5 µl was then used for each qPCR reaction. qPCR was conducted in eight parallel reactions of 20 µl each, containing oligonucleotides listed in Table S1, and Universal Mastermix (Applied Biosystems, Foster City, CA, USA). The assay ran for 45 cycles (15 seconds at 95°C, 60 seconds at 58°C) following an initial 10-minute denaturation at 95°C, using a QuantStudio 6 384-well system (Applied Biosystems). To confirm the performance of each multiplex reagent mixture, pUC57 plasmids with targeted HPV sequence inserts, synthesized by GenScript Corp. (Piscataway, NJ, USA), were used. Positive results were defined by Ct values under 37 for samples. Participants were grouped according to whether they were negative for HPV at baseline and at follow-up, positive for HPV at baseline and had fully cleared all HPV types at follow-up, positive at baseline and cleared some of the HPV types at follow-up, positive at baseline and not cleared any HPV types at follow-up, and negative at baseline and contracted one or more HPV types at follow-up.

For the analysis of biomarker gene expressions, complementary DNA (cDNA) was prepared from cervical samples, using bovine serum albumin (BSA), and the High-Capacity cDNA Reverse Transcription Kit (Thermo Fisher Scientific), excluding the RNase inhibitor. To prepare 20 µl of cDNA samples, we used 13·2 µl of unextracted sample in Ripa buffer, 1·5 µl of BSA, and 5·8 µl of High-Capacity cDNA Reverse Transcription Kit. After obtaining the cDNA samples, a qPCR on target gene assays and five housekeeping genes (details on primers are displayed in Table S1) mixed with universal master mix without UNG was performed using the QuantStudio 12k flex, 384-well system (Applied Biosystems). CT values defining expression and participant groups are as described above.

*GWAS*

With PLINK (v1.9) we performed a cluster analysis that pairs individuals based on genetic similarity. This process involves using identity by state (IBS) clustering and genetic association analysis using the Cochran–Mantel–Haenszel (CMH) test as implemented in PLINK v1.91-4. First, study participants were grouped into clusters representing genetically similar subpopulations. For each variant, the CMH test then evaluates the association between genotype and binary phenotype (case/control status) by constructing two-by-two contingency tables stratified by cluster. The test computes a weighted summary odds ratio over all strata, effectively adjusting for population stratification captured by the clustering. Only clusters containing both cases and controls were included in the analysis, as at least one individual from each outcome category is required per stratum to perform the test. This approach mitigates bias and inflation of association statistics caused by population structure or relatedness by conditioning on strata membership5. The CMH test provides a robust framework for detecting genuine genotype-phenotype associations within diverse or structured samples, improving reliability compared to unstratified analyses.

**References**

1. W.G. C. Some methods for strengthening the common χ2 test. *Biometrics* 1954; **10**: 417–51.

2. Purcell S. PLINK: Whole genome data analysis toolset. 2025. <http://pngu.mgh.harvard.edu/purcell/plink/>.

3. Purcell S, Neale B, Todd-Brown K, et al. PLINK: a tool set for whole-genome association and population-based linkage analyses. *Am J Hum Genet* 2007; **81**(3): 559-75.

4. Mantel N, Haenszel W. Statistical aspects of the analysis of data from retrospective studies of disease. *J Natl Cancer Inst* 1959; **22**(4): 719-48.

5. Greenbaum G, Templeton AR, Bar-David S. Inference and Analysis of Population Structure Using Genetic Data and Network Theory. *Genetics* 2016; **202**(4): 1299-312.
