# Supplementary material for: Genome-Wide Association Study on the Risk of Contracting Human Papillomavirus and Developing Chronic Infections in Women Living with HIV in Rwanda
Source: Research Square preprint supplement (doi:10.21203/rs.3.rs-7393970/v1), 2025-09-09
Supplement: Supplementary file 3 [file f3cf65e9fc531c86135f0dbc.xlsx]

## Sheet: Supplementary table 1
Supplementary table 3. Women with HPV infections.
	Number	%
HPV-negative in vagina/cervix at baseline and follow-up	193	50.1
Cleared HPV infection (CT<37) at follow-up	111	28.8
Chronic HPV infection (CT<37) in vagina and/or cervix	24	6.2
Partially cleared (some chronic-some cleared) HPV infections	31	8.1
HPV-negative at baseline-new HPV infection in vagina and/or cervix at follow-up	26	6.8
Total	385	100
Footnote. Infections with 12 high-risk (HPV16, 18, 31, 33, 35, 39, 45, 51, 52, 56, 58, 59) and 2 low-risk (HPV6, 11) HPV types were analyzed.

## Sheet: Supplementary table 2
Supplementary table 4. Cervical and vaginal type-specific clearance and chronicity of HPV and developing new low-risk and high-risk HPV types at follow-up.
	Cervix						Vagina								Type-specific HPV chronicity	Cleared	Chronic	% chronic
	Cleared		Chronic		New infection		Cleared		Chronic		New infection				Cervix	186	49	20.9
	N	%	N	%	N	%	N	%	N	%	N	%			Vagina	179	51	22.2
HPV6	10	2.6	4	1.0	1	0.3	8	2.1	5	1.3	3	0.8			Overall	365	100	21.5
HPV11	6	1.6	1	0.3	0	0.0	6	1.6	1	0.3	1	0.3
HPV16	19	4.9	12	3.1	8	2.1	16	4.2	11	2.9	10	2.6
HPV18	10	2.6	5	1.3	2	0.5	10	2.6	3	0.8	1	0.3
HPV31	11	2.9	3	0.8	3	0.8	9	2.3	4	1.0	5	1.3
HPV33	9	2.3	2	0.5	3	0.8	10	2.6	2	0.5	4	1.0
HPV35	11	2.9	6	1.6	5	1.3	9	2.3	5	1.3	3	0.8
HPV39	10	2.6	1	0.3	3	0.8	11	2.9	1	0.3	3	0.8
HPV45	10	2.6	0	0.0	2	0.5	8	2.1	3	0.8	5	1.3
HPV51	27	7.0	3	0.8	4	1.0	28	7.3	7	1.8	6	1.6
HPV52	24	6.2	1	0.3	10	2.6	24	6.3	3	0.8	9	2.3
HPV56	16	4.2	4	1.0	6	1.6	14	3.7	4	1.0	7	1.8
HPV58	21	5.5	7	1.8	8	2.1	24	6.3	2	0.5	7	1.8
HPV59	2	0.5	0	0.0	2	0.5	2	0.5	0	0.0	2	0.5
Footnote. New infection indicates that the patient was negative at baseline but had a new HPV infection at follow-up. For cervical HPV infections,
385 patients were tested at baseline and at 2-year follow-up. For vaginal HPV infections, 385 patients were tested at baseline but at follow-up one
vaginal sample could not be analyzed.

## Sheet: Supplementary table 3
Supplementary table 5. Type-specific clearance and chronicity of low-risk and high-risk HPVs.
	Cervix		Significance	Vagina		Significance
	Cleared at follow-up N (%)	Chronic N (%)		Cleared at follow-up N (%)	Chronic N (%)
HPV6/11 at baseline	16 (76.2)	5 (23.8)		14 (70.0)	6 (30.0)
HPV16/18 at baseline	29 (63.0)	17 (37.0)	P=0.0035	26 (65.0)	14 (35.0)	P=0.0307
Other* HR-HPV at baseline	141 (84.0)	27 (16.0)		139 (81.8)	31 (18.2)
Footnote. *Includes other high-risk (HR) HPV infections HPV31, 33, 35, 39, 45, 51, 52, 56, 58, 59) and low-risk HPV infections (HPV6, 11). Fisher's exact test was used to assess for associations between HR-HPV type and the development of chronic infection. For cervical HPV infections. 385 patients were assessed at baseline and the 2-year follow-up. For vaginal HPV infections. 385 patients were as…

## Sheet: Supplementary table 4
Supplementary table 6. Univariable and multivariable analyses of factors associated with developing partially/fully chronic vaginal/cervical HPV infections.
	COR	95% CI	Sign.	AOR	95% CI	Sign.
Age at baseline			0.88
≤35	Ref.
36-45	1.30	0.43-3.88	0.64
46-55	1.33	0.46-3.91	0.60
≥56	1.67	0.49-5.68	0.41
Education level			0.15
Below secondary school	Ref.
Complete secondary school	0.19	0.02-1.56	0.12
More than secondary school	2.91	0.47-17.99	0.25
Occupation			0.70
Farming	Ref.
Business	0.92	0.22-3.77	0.91
Sex worker	0.91	0.25-3.36	0.89
Unemployed	1.58	0.42-5.90	0.49
Others	1.23	0.26-5.73	0.79
CD4 (cell/µL) at baseline			0.94
<200	Ref.
200-500	1.48	0.36-6.05	0.60
>500	1.26	0.31-5.14	0.75
Not done	0.00	0-	1.00
Viral load (copies) at baseline			0.34
<400	Ref.
400-5000	2.14	0.42-10.98	0.36
>5000	4.28	0.38-48.32	0.24
Serious disease*			0.17
No	Ref.
Yes	2.17	0.72-6.52
Smoking habit			0.27
No	Ref.
Yes	0.73	0.14-3.75	0.70
Ex-smoker	2.18	0.81-5.87	0.12
Alcohol consumption habit			0.41
Never/seldom	Ref.
Once a month	1.66	0.62-4.43	0.31
Once a week	1.29	0.46-3.66	0.63
Several times a week	0.63	0.25-1.54	0.31
Marital status			0.01			0.07
Married	Ref.			Ref.
Has a partner but not married	0.80	0.27-2.41	0.69	0.87	0.28-2.73	0.81
Separated/divorced/widowed	0.58	0.22-1.51	0.26	0.54	0.20-1.44	0.22
Single	0.20	0.07-0.57	0.003	0.25	0.08-0.80	0.02
Live birth at baseline			0.31
0-1	Ref.
≥2	1.52	0.68-3.41
Abortions at baseline			0.43
0	Ref.
1	1.48	0.72-3.03	0.29
≥2	0.82	0.31-2.16	0.68
Age at first intercourse			0.40
<18	Ref.
≥18	0.76	0.39-1.46
Number of previous sex partners at baseline			0.02			0.39
2025-01-04	Ref.			Ref.
>4	0.46	0.23-0.90		0.71	0.32-1.55
Ever had gonorrhoea at baseline			0.71
No	Ref.
Yes	1.13	0.59-2.17
Ever had syphilis at baseline			0.36
No	Ref.
Yes	1.65	0.79-3.42	0.18
I don´t know	2.32	0.14-38.16	0.55
Ever had chlamydia at baseline			0.61
No	Ref.
Yes	1.94	0.37-10.16	0.44
I don´t know	0.85	0.43-1.66	0.63
Contraceptive method at baseline			0.64
Male condom	Ref.
Other contraceptives	1.04	0.29-3.77	0.96
Not using contraceptives	1.42	0.41-4.86	0.58
Number of vaginal/cervical HPV types			0.46
1 type	Ref.
>1 type	1.29	0.66-2.52
Cytology at baseline			0.005			0.01
Normal	Ref.			Ref.
Abnormal	2.81	1.36-5.82		2.67	1.24-5.75
Footnote. *Serious disease, i.e., cardiovascular disease, cancer, hepatitis, tuberculosis, rheumatic disease, renal failure and unspecified serious disease.

## Sheet: Supplementary table 5
	Table S4. Univariable analysis of factors associated with developing incident HPV infections at follow-up in participants HPV-negative at baseline.
		COR	95% CI	Sign.
	Age at baseline			0.54
	≤35	Ref.
	36-45	0.97	0.24-3.89	0.97
	46-55	0.75	0.19-3.00	0.68
	≥56	0.31	0.05-2.06	0.23
	Education level			0.97
	Below secondary school	Ref.
	Complete secondary school	0.82	0.18-3.77	0.80
	More than secondary school	0	0-	1.00
	Occupation			0.76
	Farming	Ref.
	Business	1.89	0.20-18.19	0.58
	Sex worker	2.14	0.23-19.67	0.50
	Unemployed	2.81	0.34-23.46	0.34
	Others	3.48	0.39-31.29	0.27
	Farming
	CD4 (cell/µL) at baseline			0.62
	<200	Ref.
	200-500	0.56	0.13-2.31	0.42
	>500	1.02	0.27-3.90	0.97
	Not done	0	0-	1.00
	Viral load (copies) at baseline
	<400	Ref.
	400-5000	0	0-	1.00
	>5000
	Serious disease			0.29
	No	Ref.
	Yes	0.33	0.04-2.54
	Smoking habit			0.74
	No	Ref.
	Yes	1.82	0.19-16.95	0.60
	Ex-smoker	0.66	0.15-2.99	0.59
	Alcohol consumption habit			0.58
	Never/seldom	Ref.
	Once a month	0.94	0.26-3.46	0.93
	Once a week	0.40	0.05-3.15	0.38
	Several times a week	1.71	0.57-5.12	0.34
	Age at first intercourse			0.84
	<18	Ref.
	18 and above	1.09	0.48-2.48
	Number of previous sex partners at baseline			0.89
	2024-01-04	Ref.
	>4	0.94	0.39-2.28
	Number of new sex partners			0.82
	0 partner	Ref.
	1 or more partners	0.90	0.36-2.26
	Ever had gonorrhoea at baseline			1.00
	No	Ref.
	Yes	0.99	0.39-2.50	0.99
	I don´t know	0	0-	1.00
	Ever had syphilis at baseline			0.50
	No	Ref.
	Yes	1.27	0.48-3.40	0.63
	I don´t know	4.03	0.35-46.53	0.26
	Ever had chlamydia baseline			0.18
	No
	Yes	0	0-	1.00
	I don´t know	2.19	0.96-5.02	0.06
	Contraceptive method at baseline			0.90
	Male condom	Ref.
	Other contraceptives	2.02E+8	0-	1.00
	Not using contraceptives	2.52E+8	0-	1.00
	Contraceptive method at follow-up			0.56
	Male condom	Ref.
	Other contraceptives	0.29	0.03-3.38	0.33
	Not using contraceptives	0.43	0.04-4.35	0.48
	Foonote. Serious disease, i.e., cardiovascular disease, cancer, hepatitis, tuberculosis,
	renal failure.

## Sheet: Supplementary table 6
CHR	SNP	UNADJ	GC	FDR_BH	Allele1	Freq_Affected	Freq_Unaffected	P_noethnicitycorr	SNPrs	chr	pos 151	200kb-less	200kb more	assembly
9	GSA-rs7024949	7.824e-06	1.613e-05	0.8868	A	0.3739	0.5165	3.904e-05	rs7024949	chr9	29198981	28998981	29398981	2013
16	rs3087620	8.272e-06	1.7e-05	0.8868	C	0.1154	0.217	7.22e-05	rs3087620	chr16	10529474	10329474	10729474	2013
21	rs1297265	8.433e-06	1.73e-05	0.8868	G	0.4893	0.3297	3.767e-06	rs1297265	chr21	15444731	15244731	15644731	2013
23	rs1206209	8.464e-06	1.736e-05	0.8868	T	0.3333	0.4918	3.795e-06	rs1206209	chrX	137477739	137277739	137677739	2013
15	GSA-rs8042868	1.148e-05	2.307e-05	0.8868	T	0.34	0.1966	6.235e-06	rs8042868	chr15	43647443	43447443	43847443	2013
4	GSA-rs4146476	1.224e-05	2.451e-05	0.8868	A	0.4013	0.5525	1.522e-05	rs4146476	chr4	65850854	65650854	66050854	2013
12	rs11837546	1.368e-05	2.719e-05	0.8868	T	0.3568	0.511	8.082e-06	rs11837546	chr12	96221037	96021037	96421037	2013
8	rs7827867	3.36e-05	6.293e-05	0.9654	G	0.2821	0.1575	2.189e-05	rs7827867	chr8	6278990	6078990	6478990	2013
3	rs7620372	3.376e-05	6.32e-05	0.9654	C	0.3739	0.522	1.963e-05	rs7620372	chr3	111189547	110989547	111389547	2013
1	rs1011903	4.311e-05	7.941e-05	0.9654	C	0.2897	0.4176	0.0001212	rs1011903	chr1	93678162	93478162	93878162	2013
3	rs169111	4.982e-05	9.091e-05	0.9654	C	0.1175	0.2198	7.225e-05	rs169111	chr3	37474041	37274041	37674041	2013
4	rs6857589	5.032e-05	9.176e-05	0.9654	T	0.2244	0.3544	3.496e-05	rs6857589	chr4	95292731	95092731	95492731	2013
1	rs72854394	5.226e-05	9.506e-05	0.9654	G	0.3782	0.2473	5.972e-05	rs72854394	chr1	6319091	6119091	6519091	2013
1	GSA-rs72858315	5.226e-05	9.506e-05	0.9654	C	0.3782	0.2473	5.972e-05	rs72858315	chr1	6324184	6124184	6524184	2013
3	rs9871209	5.254e-05	9.552e-05	0.9654	C	0.3846	0.2582	0.0001192	rs9871209	chr3	62441255	62241255	62641255	2013
1	rs1148759	5.256e-05	9.556e-05	0.9654	C	0.3974	0.5414	3.664e-05	rs1148759	chr1	187343314	187143314	187543314	2013
9	GSA-rs7020291	5.498e-05	9.967e-05	0.9654	T	0.103	0.03571	0.0002274	rs7020291	chr9	134517617	134317617	134717617	2013
23	rs5976172	5.876e-05	0.0001061	0.9654	T	0.4295	0.5742	3.456e-05	rs5976172	chrX	138599306	138399306	138799306	2013
16	rs12934429	5.892e-05	0.0001063	0.9654	A	0.09829	0.1989	3.859e-05	rs12934429	chr16	6125291	5925291	6325291	2013
10	rs11018230	5.997e-05	0.0001081	0.9654	T	0.4359	0.3104	0.0002185	rs11018230	chr10	127620691	127420691	127820691	2013
10	rs2494657	6.108e-05	0.00011	0.9654	T	0.3483	0.4973	1.502e-05	rs2494657	chr10	99453522	99253522	99653522	2013
11	rs662533	6.904e-05	0.0001233	0.9654	T	0.2799	0.4148	4.531e-05	rs662533	chr11	79248310	79048310	79448310	2013
7	rs4716515	7.006e-05	0.000125	0.9654	G	0.5342	0.3956	7.14e-05	rs4716515	chr7	157968382	157768382	158168382	2013
6	rs4869694	7.558e-05	0.0001342	0.9654	A	0.1325	0.05769	0.0003558	rs4869694	chr6	150800091	150600091	151000091	2013
3	GSA-rs1444768	7.61e-05	0.000135	0.9654	A	0.1432	0.2555	4.534e-05	rs1444768	chr3	124205074	124005074	124405074	2013
8	rs17655231	8.126e-05	0.0001436	0.9654	C	0.1695	0.08791	0.0006082	rs17655231	chr8	15059415	14859415	15259415	2013
1	rs2184345	8.91e-05	0.0001565	0.9654	C	0.3868	0.5192	0.0001364	rs2184345	chr1	232675364	232475364	232875364	2013
20	rs6015313	9.168e-05	0.0001607	0.9654	T	0.4081	0.2775	8.968e-05	rs6015313	chr20	58591135	58391135	58791135	2013
8	rs72651258	9.21e-05	0.0001614	0.9654	T	0.1068	0.03846	0.0002409	rs72651258	chr8	64056729	63856729	64256729	2013
15	rs1896195	9.252e-05	0.0001621	0.9654	C	0.5577	0.4148	4.342e-05	rs1896195	chr15	26525409	26325409	26725409	2013
19	rs4805325	9.314e-05	0.0001631	0.9654	A	0.3739	0.2308	9.679e-06	rs4805325	chr19	29020082	28820082	29220082	2013
8	GSA-rs17655261	9.386e-05	0.0001643	0.9654	C	0.1824	0.09615	0.0004548	rs17655261	chr8	15063545	14863545	15263545	2013
23	rs7052771	9.568e-05	0.0001672	0.9654	T	0.04915	0.1209	0.0001618	rs7052771	chrX	138638323	138438323	138838323	2013
5	rs7717348	9.769e-05	0.0001705	0.9654	T	0.25	0.3571	0.0007919	rs7717348	chr5	96072189	95872189	96272189	2013
12	rs2630601	9.883e-05	0.0001724	0.9654	C	0.2778	0.1566	3.265e-05	rs2630601	chr12	32134978	31934978	32334978	2013
4	rs79264307	0.0001003	0.0001748	0.9654	A	0.01496	0.06593	0.0001175	rs79264307	chr4	152783659	152583659	152983659	2013
16	rs4556797	0.000101	0.000176	0.9654	G	0.3654	0.2308	2.94e-05	rs4556797	chr16	80004089	79804089	80204089	2013
13	GSA-rs1596034	0.0001026	0.0001785	0.9654	T	0.2607	0.3846	0.0001346	rs1596034	chr13	79018245	78818245	79218245	2013
6	rs2256539	0.0001051	0.0001826	0.9654	C	0.4274	0.5718	3.645e-05	rs2256539	chr6	29969962	29769962	30169962	2013
4	GSA-rs3733328	0.0001133	0.0001958	0.9654	T	0.3184	0.4505	9.457e-05	rs3733328	chr4	83597161	83397161	83797161	2013
4	rs13137695	0.0001144	0.0001976	0.9654	C	0.08974	0.1841	6.332e-05	rs13137695	chr4	132819586	132619586	133019586	2013
18	seq-rs377380065	0.0001278	0.0002191	0.9654	G	0.2735	0.3929	0.0002682	rs377380065	chr18	74439116	74239116	74639116	2013
11	rs866347	0.0001315	0.0002251	0.9654	A	0.4444	0.3132	0.0001152	rs866347	chr11	6795546	6595546	6995546	2013
7	rs57435918	0.0001318	0.0002255	0.9654	T	0.2244	0.1291	0.0004208	rs57435918	chr7	37107684	36907684	37307684	2013
11	rs510204	0.000133	0.0002275	0.9654	C	0.2842	0.4121	0.000112	rs510204	chr11	79239432	79039432	79439432	2013
3	GSA-rs76952927	0.0001353	0.0002312	0.9654	T	0.1688	0.2885	3.699e-05	rs76952927	chr3	75061724	74861724	75261724	2013
2	GSA-rs6751535	0.000136	0.0002324	0.9654	G	0.2991	0.4231	0.0002074	rs6751535	chr2	21663051	21463051	21863051	2013
10	rs575865	0.000136	0.0002322	0.9654	C	0.01923	0.07418	0.0001115	rs575865	chr10	88159247	87959247	88359247	2013
11	GSA-rs1369322	0.0001362	0.0002325	0.9654	T	0.359	0.2308	6.543e-05	rs1369322	chr11	38387892	38187892	38587892	2013
21	rs11701143	0.0001385	0.0002363	0.9654	C	0.1047	0.2005	0.0001057	rs11701143	chr21	42315418	42115418	42515418	2013
10	rs12359155	0.0001389	0.0002369	0.9654	C	0.1111	0.03571	5.818e-05	rs12359155	chr10	19707238	19507238	19907238	2013
6	seq-rs374341629	0.0001399	0.0002385	0.9654	G	0.06466	0.01124	0.0001429	rs374341629	chr6	69320816	69120816	69520816	2013
3	rs2922180	0.0001423	0.0002423	0.9654	G	0.1709	0.2802	0.0001552	rs2922180	chr3	125561628	125361628	125761628	2013
15	rs985868	0.0001441	0.0002452	0.9654	G	0.1987	0.3049	0.0004105	rs985868	chr15	71622938	71422938	71822938	2013
11	GSA-rs657554	0.0001509	0.000256	0.9654	A	0.2714	0.3923	0.0002239	rs657554	chr11	56861899	56661899	57061899	2013
15	rs35980969	0.0001561	0.0002642	0.9654	A	0.03632	0.09615	0.0004052	rs35980969	chr15	91471316	91271316	91671316	2013
4	rs10866165	0.000158	0.0002672	0.9654	C	0.3739	0.5055	0.000147	rs10866165	chr4	65846412	65646412	66046412	2013
8	rs10808665	0.0001704	0.0002868	0.9654	C	0.4487	0.3343	0.0008384	rs10808665	chr8	93981591	93781591	94181591	2013
5	rs150887	0.0001709	0.0002876	0.9654	A	0.1026	0.0419	0.001134	rs150887	chr5	56189352	55989352	56389352	2013
16	rs116935403	0.0001761	0.0002957	0.9654	C	0.1282	0.0522	0.0002072	rs116935403	chr16	6191145	5991145	6391145	2013
10	GSA-rs10995147	0.0001812	0.0003038	0.9654	G	0.3974	0.272	0.0001551	rs10995147	chr10	62405525	62205525	62605525	2013
3	rs9857249	0.0001816	0.0003043	0.9654	T	0.1282	0.0522	0.0002072	rs9857249	chr3	125053870	124853870	125253870	2013
2	GSA-rs3771044	0.0001826	0.0003059	0.9654	G	0.3184	0.2182	0.001349	rs3771044	chr2	205712686	205512686	205912686	2013
19	rs12052046	0.0001837	0.0003077	0.9654	T	0.1111	0.2005	0.0003413	rs12052046	chr19	38645233	38445233	38845233	2013
9	GSA-rs7020194	0.0001848	0.0003093	0.9654	C	0.4509	0.3434	0.001728	rs7020194	chr9	107537602	107337602	107737602	2013
6	GSA-rs484434	0.0001896	0.0003169	0.9654	T	0.1453	0.06044	9.252e-05	rs484434	chr6	155342748	155142748	155542748	2013
10	rs3740086	0.0001902	0.0003179	0.9654	A	0.3782	0.5166	6.778e-05	rs3740086	chr10	44879847	44679847	45079847	2013
9	GSA-rs2440585	0.0001945	0.0003246	0.9654	A	0.4274	0.5604	0.0001388	rs2440585	chr9	91404227	91204227	91604227	2013
21	rs2823286	0.0001966	0.0003278	0.9654	A	0.2863	0.1703	9.181e-05	rs2823286	chr21	15445618	15245618	15645618	2013
19	rs4802747	0.0001989	0.0003313	0.9654	T	0.1111	0.2005	0.0003413	rs4802747	chr19	38699947	38499947	38899947	2013
8	rs6984395	0.0002011	0.0003349	0.9654	A	0.324	0.2033	0.0001032	rs6984395	chr8	132362083	132162083	132562083	2013
7	GSA-rs78185258	0.0002067	0.0003435	0.9654	A	0.09615	0.1896	0.0001016	rs78185258	chr7	125736094	125536094	125936094	2013
6	rs881751	0.0002074	0.0003447	0.9654	G	0.547	0.4148	0.0001547	rs881751	chr6	158017996	157817996	158217996	2013
12	rs2291073	0.0002135	0.000354	0.9654	T	0.3974	0.5412	3.667e-05	rs2291073	chr12	21172879	20972879	21372879	2013
12	GSA-rs17008872	0.0002143	0.0003553	0.9654	C	0	0.03039	0.0001469	rs17008872	chr12	81666905	81466905	81866905	2013
23	rs5941048	0.0002173	0.00036	0.9654	C	0.3077	0.4313	0.0002319	rs5941048	chrX	92178230	91978230	92378230	2013
22	GSA-rs6006488	0.0002182	0.0003614	0.9654	T	0.3077	0.1923	0.0001585	rs6006488	chr22	44110352	43910352	44310352	2013
14	rs994827	0.0002194	0.0003632	0.9654	C	0.4872	0.3654	0.0004374	rs994827	chr14	21881503	21681503	22081503	2013
8	GSA-rs12677346	0.0002212	0.000366	0.9654	A	0.1517	0.07692	0.0009493	rs12677346	chr8	94826640	94626640	95026640	2013
5	GSA-rs13161413	0.0002289	0.0003778	0.9654	G	0.05128	0.1181	0.0004392	rs13161413	chr5	91665862	91465862	91865862	2013
15	rs10438339	0.0002294	0.0003787	0.9654	C	0.3782	0.2637	0.0004858	rs10438339	chr15	32108016	31908016	32308016	2013
6	GSA-rs6923505	0.000235	0.0003874	0.9654	A	0.1453	0.07143	0.0008408	rs6923505	chr6	150807355	150607355	151007355	2013
11	GSA-rs2009804	0.000236	0.0003888	0.9654	A	0.4658	0.3462	0.0005073	rs2009804	chr11	45514971	45314971	45714971	2013
2	GSA-rs6739069	0.0002469	0.0004056	0.9654	T	0.1389	0.239	0.0002093	rs6739069	chr2	235107673	234907673	235307673	2013
6	rs28649066	0.0002501	0.0004105	0.9654	A	0.02778	0.07418	0.001913	rs28649066	chr6	40411603	40211603	40611603	2013
4	rs1379977	0.0002538	0.0004162	0.9654	G	0.2768	0.3901	0.0005532	rs1379977	chr4	83629605	83429605	83829605	2013
6	exm2270542	0.0002561	0.0004198	0.9654	T	0.2949	0.1961	0.001154	exm2270542	chr6	167267919	167067919	167467919	2009
15	rs2405779	0.0002584	0.0004233	0.9654	T	0.1094	0.04121	0.0003116	rs2405779	chr15	75811088	75611088	76011088	2013
15	rs12440371	0.0002585	0.0004234	0.9654	A	0.03632	0.09066	0.00107	rs12440371	chr15	94675680	94475680	94875680	2013
2	rs35338671	0.0002585	0.0004233	0.9654	C	0.07692	0.02198	0.0004431	rs35338671	chr2	197126016	196926016	197326016	2013
2	GSA-rs17031742	0.0002604	0.0004263	0.9654	C	0.1645	0.08242	0.0004484	rs17031742	chr2	43874744	43674744	44074744	2013
1	rs11122334	0.0002621	0.0004288	0.9654	T	0.1325	0.2198	0.0008989	rs11122334	chr1	231783839	231583839	231983839	2013
6	rs5009448	0.0002669	0.0004362	0.9654	T	0.2094	0.3269	0.0001282	rs5009448	chr6	29972710	29772710	30172710	2013
4	rs4691885	0.0002681	0.0004381	0.9654	T	0.2597	0.163	0.0008217	rs4691885	chr4	162997516	162797516	163197516	2013
9	GSA-rs78973310	0.0002687	0.000439	0.9654	A	0.07692	0.02473	0.0009595	rs78973310	chr9	134540113	134340113	134740113	2013
5	rs4073517	0.0002706	0.0004419	0.9654	A	0.2436	0.1429	0.0003101	rs4073517	chr5	107030137	106830137	107230137	2013
19	rs12983573	0.0002707	0.000442	0.9654	C	0.07906	0.1566	0.0004574	rs12983573	chr19	10591156	10391156	10791156	2013
1	GSA-rs34360045	0.0002776	0.0004525	0.9654	G	0.4124	0.5192	0.002157	rs34360045	chr1	235054935	234854935	235254935	2013
13	GSA-rs11840350	0.0002815	0.0004584	0.9654	A	0.5085	0.4011	0.002042	rs11840350	chr13	82600433	82400433	82800433	2013
22	rs361787	0.0002829	0.0004606	0.9654	C	0.2158	0.3379	8.185e-05	rs361787	chr22	19276174	19076174	19476174	2013
7	rs2948196	0.0002854	0.0004645	0.9654	A	0.3462	0.2431	0.00133	rs2948196	chr7	63071253	62871253	63271253	2013
19	rs73038948	0.0002918	0.0004742	0.9654	C	0.1132	0.2005	0.0004926	rs73038948	chr19	38737603	38537603	38937603	2013
3	rs35151055	0.0002935	0.0004767	0.9654	C	0.4209	0.3011	0.0003871	rs35151055	chr3	197054253	196854253	197254253	2013
6	rs16896944	0.000296	0.0004805	0.9654	C	0.1902	0.0989	0.0002571	rs16896944	chr6	30058368	29858368	30258368	2013
6	rs60940958	0.000296	0.0004805	0.9654	G	0.1902	0.0989	0.0002571	rs60940958	chr6	30074738	29874738	30274738	2013
12	rs12423046	0.0002965	0.0004813	0.9654	T	0.04274	0.1071	0.00033	rs12423046	chr12	25929646	25729646	26129646	2013
18	rs78134275	0.0002969	0.0004819	0.9654	G	0.004274	0.03571	0.0007217	rs78134275	chr18	4039638	3839638	4239638	2013
5	rs43188	0.0002982	0.0004838	0.9654	A	0.1239	0.206	0.001345	rs43188	chr5	53025109	52825109	53225109	2013
9	GSA-rs12338659	0.0002983	0.0004841	0.9654	G	0.2393	0.3489	0.0005293	rs12338659	chr9	30403717	30203717	30603717	2013
12	rs33202	0.0002983	0.000484	0.9654	G	0.05342	0.1236	0.0002957	rs33202	chr12	30793134	30593134	30993134	2013
6	rs73039453	0.0003013	0.0004886	0.9654	G	0.2575	0.163	0.001047	rs73039453	chr6	166855516	166655516	167055516	2013
4	rs62315335	0.0003029	0.0004909	0.9654	T	0.3462	0.228	0.0002085	rs62315335	chr4	67045394	66845394	67245394	2013
4	rs6536694	0.0003053	0.0004946	0.9654	A	0.4274	0.5467	0.0006296	rs6536694	chr4	163013455	162813455	163213455	2013
23	rs2208017	0.0003074	0.0004979	0.9654	A	0.4209	0.3022	0.0004296	rs2208017	chrX	111133291	110933291	111333291	2013
15	rs55792173	0.0003098	0.0005014	0.9654	G	0.2415	0.1456	0.0005995	rs55792173	chr15	101428615	101228615	101628615	2013
4	rs1036757	0.0003119	0.0005047	0.9654	T	0.359	0.232	8.019e-05	rs1036757	chr4	114930026	114730026	115130026	2013
10	rs981360	0.000314	0.0005078	0.9654	T	0.1859	0.283	0.0009369	rs981360	chr10	105286786	105086786	105486786	2013
6	rs16895214	0.0003142	0.000508	0.9654	G	0.06838	0.02198	0.001913	rs16895214	chr6	29648015	29448015	29848015	2013
3	rs898820	0.0003166	0.0005117	0.9654	C	0.5021	0.3791	0.000401	rs898820	chr3	194671422	194471422	194871422	2013
15	rs76875574	0.0003174	0.000513	0.9654	A	0.03632	0.09341	0.0006615	rs76875574	chr15	40083896	39883896	40283896	2013
8	rs7011831	0.0003213	0.0005188	0.9654	A	0.1709	0.2857	7.585e-05	rs7011831	chr8	30067810	29867810	30267810	2013
12	rs148154047	0.0003214	0.000519	0.9654	T	0.01288	0.05495	0.0005554	rs148154047	chr12	48981533	48781533	49181533	2013
10	GSA-rs2884469	0.0003226	0.0005208	0.9654	T	0.04274	0.002747	0.0002644	rs2884469	chr10	19780071	19580071	19980071	2013
4	rs78483409	0.0003245	0.0005237	0.9654	T	0.1432	0.2418	0.0002906	rs78483409	chr4	20248881	20048881	20448881	2013
2	GSA-rs3922472	0.0003291	0.0005306	0.9654	T	0.1453	0.239	0.0005731	rs3922472	chr2	180907534	180707534	181107534	2013
4	rs2320331	0.0003322	0.0005352	0.9654	T	0.2799	0.3984	0.0003189	rs2320331	chr4	163068855	162868855	163268855	2013
6	GSA-rs75793167	0.0003346	0.0005389	0.9654	T	0.01931	0.07222	0.0001817	rs75793167	chr6	123078956	122878956	123278956	2013
3	rs1530687	0.0003381	0.0005441	0.9654	A	0.1603	0.2527	0.0009525	rs1530687	chr3	119395667	119195667	119595667	2013
6	rs16896853	0.0003401	0.0005472	0.9654	A	0.1987	0.1099	0.0005237	rs16896853	chr6	29992553	29792553	30192553	2013
12	rs76068938	0.0003405	0.0005478	0.9654	T	0.00641	0.03846	0.001188	rs76068938	chr12	130675871	130475871	130875871	2013
12	rs57181099	0.0003417	0.0005495	0.9654	A	0.4316	0.5659	0.0001208	rs57181099	chr12	70121835	69921835	70321835	2013
7	GSA-rs6951104	0.0003436	0.0005524	0.9654	C	0.3825	0.5194	8.353e-05	rs6951104	chr7	27214175	27014175	27414175	2013
6	rs7746862	0.000344	0.0005529	0.9654	C	0.1667	0.08516	0.0005475	rs7746862	chr6	93536385	93336385	93736385	2013
13	rs7317491	0.0003455	0.0005553	0.9654	A	0.2457	0.1593	0.00232	rs7317491	chr13	44033142	43833142	44233142	2013
5	rs2216695	0.000346	0.0005559	0.9654	A	0.3269	0.228	0.001692	rs2216695	chr5	91990814	91790814	92190814	2013
23	rs6635708	0.0003522	0.0005654	0.9654	C	0.04915	0.1154	0.0004127	rs6635708	chrX	138613729	138413729	138813729	2013
3	GSA-rs72937982	0.000362	0.00058	0.9654	G	0.2628	0.3736	0.0006164	rs72937982	chr3	111189336	110989336	111389336	2013
1	rs11577892	0.0003636	0.0005824	0.9654	G	0.2991	0.1978	0.0008751	rs11577892	chr1	147721870	147521870	147921870	2013
7	GSA-rs76450915	0.0003703	0.0005923	0.9654	A	0.1538	0.07143	0.0002538	rs76450915	chr7	13606112	13406112	13806112	2013
16	rs74549368	0.0003716	0.0005944	0.9654	A	0.08974	0.1676	0.0007201	rs74549368	chr16	22994671	22794671	23194671	2013
6	rs1328388	0.000372	0.000595	0.9654	C	0.4103	0.522	0.001337	rs1328388	chr6	39412077	39212077	39612077	2013
12	rs78225067	0.0003722	0.0005953	0.9654	A	0.08874	0.03039	0.000628	rs78225067	chr12	98618261	98418261	98818261	2013
9	GSA-rs4879635	0.0003733	0.0005969	0.9654	G	0.2382	0.3508	0.0003819	rs4879635	chr9	32899808	32699808	33099808	2013
6	rs116362778	0.0003793	0.0006058	0.9654	T	0.004274	0.03571	0.0007217	rs116362778	chr6	33330930	33130930	33530930	2013
23	rs1883105	0.0003811	0.0006085	0.9654	A	0.2137	0.3297	0.0001676	rs1883105	chrX	129235796	129035796	129435796	2013
6	rs56344665	0.0003825	0.0006106	0.9654	C	0.1902	0.09945	0.0002901	rs56344665	chr6	30018632	29818632	30218632	2013
1	rs75402516	0.0003876	0.0006182	0.9654	T	0.01496	0.05769	0.0006967	rs75402516	chr1	205438886	205238886	205638886	2013
12	rs11178358	0.0003883	0.0006192	0.9654	G	0.2393	0.1511	0.001624	rs11178358	chr12	70673049	70473049	70873049	2013
1	GSA-rs17012576	0.0003884	0.0006195	0.9654	A	0.07479	0.1374	0.003112	rs17012576	chr1	208461074	208261074	208661074	2013
20	rs6083538	0.0003926	0.0006257	0.9654	T	0.1838	0.1016	0.0009319	rs6083538	chr20	2522093	2322093	2722093	2013
19	rs12721649	0.0003951	0.0006295	0.9654	A	0.1432	0.2335	0.0008203	rs12721649	chr19	41009931	40809931	41209931	2013
7	rs12673114	0.0003971	0.0006325	0.9654	A	0.203	0.1071	0.0001906	rs12673114	chr7	78657876	78457876	78857876	2013
11	rs669765	0.000398	0.0006338	0.9654	C	0.2201	0.3324	0.0002903	rs669765	chr11	126988264	126788264	127188264	2013
10	rs1867974	0.0003981	0.0006339	0.9654	A	0.4274	0.3094	0.0005026	rs1867974	chr10	69385478	69185478	69585478	2013
14	rs1152500	0.0003991	0.0006353	0.9654	T	0.3205	0.4313	0.001017	rs1152500	chr14	56349816	56149816	56549816	2013
7	GSA-rs10254379	0.0004	0.0006368	0.9654	G	0.2927	0.3984	0.001409	rs10254379	chr7	125748376	125548376	125948376	2013
12	rs76767665	0.0004048	0.0006439	0.9654	C	0.03205	0.002747	0.002264	rs76767665	chr12	52794270	52594270	52994270	2013
10	rs11599446	0.0004062	0.0006459	0.9654	A	0.03205	0.09341	0.0001921	rs11599446	chr10	12535496	12335496	12735496	2013
23	rs5930219	0.0004099	0.0006514	0.9654	T	0.3326	0.2225	0.0004851	rs5930219	chrX	127984089	127784089	128184089	2013
5	rs2366837	0.0004115	0.0006539	0.9654	G	0.1816	0.2775	0.0009951	rs2366837	chr5	37925136	37725136	38125136	2013
23	exm-rs5943057	0.0004121	0.0006547	0.9654	T	0.1731	0.2802	0.0002145	rs5943057	chrX	110695976	110495976	110895976	2009
23	rs5943057	0.0004121	0.0006547	0.9654	T	0.1731	0.2802	0.0002145	rs5943057	chrX	110695976	110495976	110895976	2013
23	JHU_X.111858321	0.0004145	0.0006583	0.9654	G	0.4209	0.3077	0.0007971	JHU_X.111858321	chrX	111858321	111658321	112058321	2009
12	rs4882972	0.0004161	0.0006607	0.9654	T	0.1603	0.07735	0.0003272	rs4882972	chr12	8968306	8768306	9168306	2013
12	rs7135080	0.0004201	0.0006666	0.9654	C	0.3526	0.2431	0.00068	rs7135080	chr12	62704188	62504188	62904188	2013
8	rs7459520	0.000424	0.0006723	0.9654	G	0.1325	0.2198	0.0008989	rs7459520	chr8	137784474	137584474	137984474	2013
1	GSA-rs75022873	0.000424	0.0006724	0.9654	G	0.03205	0.07967	0.00233	rs75022873	chr1	205447085	205247085	205647085	2013
10	rs399205	0.0004278	0.000678	0.9654	T	0.3291	0.4451	0.0006266	rs399205	chr10	81119566	80919566	81319566	2013
18	rs1917906	0.0004285	0.000679	0.9654	G	0.25	0.3626	0.0004323	rs1917906	chr18	5724506	5524506	5924506	2013
10	rs6601745	0.0004287	0.0006793	0.9654	C	0.2115	0.1209	0.0005849	rs6601745	chr10	3676971	3476971	3876971	2013
2	rs11681484	0.0004365	0.0006909	0.9654	G	0.4124	0.5357	0.0004043	rs11681484	chr2	79741031	79541031	79941031	2013
5	GSA-rs1875017	0.0004401	0.0006962	0.9654	A	0.4188	0.3104	0.001331	rs1875017	chr5	10451041	10251041	10651041	2013
4	rs72672131	0.0004404	0.0006966	0.9654	C	0.0235	0.07418	0.0005148	rs72672131	chr4	129408175	129208175	129608175	2013
15	rs8029334	0.0004417	0.0006985	0.9654	C	0.1239	0.2099	0.0008383	rs8029334	chr15	88747710	88547710	88947710	2013
4	rs4864767	0.0004461	0.0007051	0.9654	G	0.4637	0.3297	9.382e-05	rs4864767	chr4	53500968	53300968	53700968	2013
23	kgp22791887	0.0004474	0.000707	0.9654	C	0.05769	0.01374	0.001073	kgp22791887	chrX	7568619	7368619	7768619	2009
7	rs1859741	0.0004537	0.0007163	0.9654	A	0.1538	0.07967	0.001154	rs1859741	chr7	22351578	22151578	22551578	2013
2	rs28429942	0.0004553	0.0007186	0.9654	A	0.08974	0.1758	0.0002206	rs28429942	chr2	67209490	67009490	67409490	2013
5	GSA-rs34634103	0.0004587	0.0007237	0.9654	C	0.05128	0.1126	0.00107	rs34634103	chr5	91762127	91562127	91962127	2013
11	rs4420262	0.0004602	0.0007259	0.9654	T	0.09829	0.03571	0.0004859	rs4420262	chr11	21472136	21272136	21672136	2013
7	rs2535376	0.0004615	0.0007278	0.9654	G	0.3526	0.239	0.0004061	rs2535376	chr7	83499167	83299167	83699167	2013
7	GSA-rs78238414	0.0004615	0.0007278	0.9654	T	0.04274	0.005495	0.0008963	rs78238414	chr7	101520107	101320107	101720107	2013
23	rs1801187	0.000464	0.0007315	0.9654	T	0.01709	0.05769	0.001539	rs1801187	chrX	32362878	32162878	32562878	2013
23	exm1633338	0.000464	0.0007315	0.9654	T	0.01709	0.05769	0.001539	exm1633338	chrX	32362878	32162878	32562878	2013
3	rs76343500	0.0004667	0.0007354	0.9654	A	0.01496	0.05495	0.001242	rs76343500	chr3	51946219	51746219	52146219	2013
20	20:61300278	0.0004679	0.0007372	0.9654	T	0.002137	0.02747	0.001504	20:61300278	chr20	61300278	61100278	61500278	2009
8	rs60015363	0.0004704	0.0007409	0.9654	A	0.08333	0.02473	0.0003222	rs60015363	chr8	65189220	64989220	65389220	2013
11	rs12361561	0.0004708	0.0007415	0.9654	A	0.1068	0.1951	0.0003427	rs12361561	chr11	45036503	44836503	45236503	2013
6	GSA-rs9356529	0.0004773	0.0007511	0.9654	A	0.2222	0.1374	0.001769	rs9356529	chr6	166857650	166657650	167057650	2013
1	GSA-rs116695592	0.000478	0.0007521	0.9654	C	0	0.02473	0.0006257	rs116695592	chr1	18719406	18519406	18919406	2013
19	rs36118214	0.0004798	0.0007548	0.9654	A	0.1453	0.2361	0.000845	rs36118214	chr19	41013400	40813400	41213400	2013
15	rs11070218	0.0004813	0.0007569	0.9654	A	0.4081	0.3022	0.001609	rs11070218	chr15	39530856	39330856	39730856	2013
6	rs1419055	0.0004814	0.0007572	0.9654	T	0.4551	0.3489	0.001988	rs1419055	chr6	106636835	106436835	106836835	2013
1	rs4845434	0.0004818	0.0007577	0.9654	A	0.004274	0.04121	0.0001872	rs4845434	chr1	152442085	152242085	152642085	2013
6	rs6927091	0.000482	0.000758	0.9654	T	0.01709	0.06319	0.0004971	rs6927091	chr6	25422732	25222732	25622732	2013
3	rs11128716	0.000486	0.0007638	0.9654	T	0.05769	0.01099	0.000418	rs11128716	chr3	14704063	14504063	14904063	2013
19	rs12985029	0.0004864	0.0007644	0.9654	A	0.03205	0.08242	0.001441	rs12985029	chr19	51210108	51010108	51410108	2013
5	rs1500855	0.0004889	0.0007681	0.9654	T	0.1496	0.07143	0.0004654	rs1500855	chr5	174495108	174295108	174695108	2013
1	rs2096210	0.0004894	0.0007689	0.9654	C	0.06624	0.1346	0.0009039	rs2096210	chr1	115858772	115658772	116058772	2013
19	rs3852865	0.0004931	0.0007743	0.9654	A	0.02991	0.07967	0.0013	rs3852865	chr19	51210808	51010808	51410808	2013
6	GSA-rs77446255	0.0004948	0.0007768	0.9654	T	0.01709	0.06593	0.000279	rs77446255	chr6	123242821	123042821	123442821	2013
7	rs77984018	0.0005008	0.0007856	0.9654	T	0.05128	0.01099	0.001388	rs77984018	chr7	101519262	101319262	101719262	2013
23	rs144212373	0.0005037	0.0007899	0.9654	C	0.01709	0.06044	0.0008784	rs144212373	chrX	128334525	128134525	128534525	2013
4	GSA-rs17058676	0.0005147	0.000806	0.9654	G	0.008547	0.0467	0.0004999	rs17058676	chr4	172619619	172419619	172819619	2013
15	exm2264572	0.0005164	0.0008084	0.9654	A	0.4915	0.3599	0.0001456	exm2264572	chr15	36635324	36435324	36835324	2009
7	rs112352459	0.0005182	0.0008112	0.9654	T	0.02778	0.07692	0.001158	rs112352459	chr7	127839207	127639207	128039207	2013
13	rs3742159	0.0005224	0.0008173	0.9654	T	0.132	0.2265	0.0003789	rs3742159	chr13	106493555	106293555	106693555	2013
16	exm2260591	0.0005253	0.0008216	0.9654	G	0.1645	0.2665	0.0003343	exm2260591	chr16	76523792	76323792	76723792	2009
6	GSA-rs9481167	0.0005274	0.0008245	0.9654	G	0.4017	0.2873	0.0006191	rs9481167	chr6	111587678	111387678	111787678	2013
6	rs9294982	0.0005312	0.0008301	0.9654	A	0.3504	0.2431	0.0008532	rs9294982	chr6	169296802	169096802	169496802	2013
12	rs2544038	0.0005351	0.0008357	0.9654	C	0.2863	0.4066	0.0002773	rs2544038	chr12	47821449	47621449	48021449	2013
12	GSA-rs11180523	0.000538	0.0008401	0.9654	C	0.1838	0.2857	0.0005103	rs11180523	chr12	75447986	75247986	75647986	2013
18	rs1607485	0.0005386	0.0008409	0.9654	A	0.3162	0.206	0.000371	rs1607485	chr18	27417645	27217645	27617645	2013
23	rs7884816	0.0005404	0.0008435	0.9654	C	0.1346	0.2253	0.0006269	rs7884816	chrX	146159190	145959190	146359190	2013
4	rs34792444	0.0005418	0.0008455	0.9654	C	0.1068	0.2005	0.0001581	rs34792444	chr4	146230778	146030778	146430778	2013
5	rs73773374	0.0005436	0.0008482	0.9654	C	0.1496	0.07692	0.00126	rs73773374	chr5	91381952	91181952	91581952	2013
20	rs6025518	0.0005463	0.0008521	0.9654	T	0.5299	0.4011	0.0002228	rs6025518	chr20	57378496	57178496	57578496	2013
9	GSA-rs77819017	0.0005499	0.0008575	0.9654	G	0.1845	0.2857	0.0005768	rs77819017	chr9	78452818	78252818	78652818	2013
10	rs902996	0.0005508	0.0008588	0.9654	C	0.1902	0.283	0.001624	rs902996	chr10	103624733	103424733	103824733	2013
2	rs732734	0.0005525	0.0008612	0.9654	T	0.0641	0.01381	0.0003501	rs732734	chr2	2707966	2507966	2907966	2013
20	rs4815273	0.0005537	0.000863	0.9654	T	0.2244	0.1346	0.0009448	rs4815273	chr20	2520224	2320224	2720224	2013
6	GSA-rs73552860	0.0005537	0.0008629	0.9654	C	0.02137	0.06868	0.0007447	rs73552860	chr6	134577222	134377222	134777222	2013
2	GSA-rs116533843	0.0005543	0.0008638	0.9654	T	0.07265	0.01923	0.0004133	rs116533843	chr2	136889277	136689277	137089277	2013
11	GSA-rs72948137	0.0005549	0.0008648	0.9654	C	0	0.02473	0.0006257	rs72948137	chr11	36315091	36115091	36515091	2013
6	rs9261506	0.0005592	0.000871	0.9654	A	0.03419	0.09341	0.0003633	rs9261506	chr6	30144845	29944845	30344845	2013
12	GSA-rs11179928	0.0005635	0.0008773	0.9654	C	0.1688	0.2582	0.001613	rs11179928	chr12	74124047	73924047	74324047	2013
10	rs2342606	0.000566	0.0008808	0.9654	T	0.3184	0.4286	0.001067	rs2342606	chr10	80034406	79834406	80234406	2013
7	rs1029568	0.00057	0.0008867	0.9654	A	0.4615	0.3544	0.001859	rs1029568	chr7	81680188	81480188	81880188	2013
5	rs10073517	0.0005718	0.0008892	0.9654	A	0.4274	0.5467	0.0006296	rs10073517	chr5	76507493	76307493	76707493	2013
2	GSA-rs35459333	0.0005749	0.0008938	0.9654	G	0.02778	0	0.001351	rs35459333	chr2	59629764	59429764	59829764	2013
9	GSA-rs4917360	0.0005858	0.0009096	0.9654	T	0.265	0.1758	0.002291	rs4917360	chr9	134245398	134045398	134445398	2013
23	rs2032468	0.0005872	0.0009117	0.9654	A	0.2628	0.1621	0.000489	rs2032468	chrX	127976472	127776472	128176472	2013
6	rs3025651	0.0005912	0.0009175	0.9654	G	0.09615	0.03297	0.0003448	rs3025651	chr6	29572136	29372136	29772136	2013
10	GSA-rs2804591	0.0006011	0.0009319	0.9654	A	0.2906	0.4093	0.0003431	rs2804591	chr10	112027810	111827810	112227810	2013
11	GSA-rs7112940	0.000607	0.0009404	0.9654	A	0.5427	0.4286	0.001085	rs7112940	chr11	117502716	117302716	117702716	2013
1	rs59531141	0.0006102	0.0009451	0.9654	G	0.25	0.1519	0.0005469	rs59531141	chr1	5735520	5535520	5935520	2013
1	rs12043762	0.0006102	0.0009451	0.9654	G	0.25	0.1519	0.0005469	rs12043762	chr1	5735539	5535539	5935539	2013
12	GSA-rs11051689	0.000611	0.0009462	0.9654	G	0.002137	0.03571	0.0001874	rs11051689	chr12	31931892	31731892	32131892	2013
2	rs1966806	0.0006111	0.0009463	0.9654	T	0.3526	0.25	0.001474	rs1966806	chr2	223186643	222986643	223386643	2013
10	rs928336	0.0006124	0.0009482	0.9654	G	0.4423	0.5632	0.0005412	rs928336	chr10	12792926	12592926	12992926	2013
17	rs8068071	0.0006131	0.0009492	0.9654	A	0.25	0.3544	0.001063	rs8068071	chr17	43705410	43505410	43905410	2013
16	rs201036290	0.0006147	0.0009515	0.9654	A	0	0.02198	0.00127	rs201036290	chr16	75545463	75345463	75745463	2013
3	rs237885	0.0006149	0.0009518	0.9654	T	0.4573	0.5632	0.002434	rs237885	chr3	8753856	8553856	8953856	2013
1	rs59862356	0.0006155	0.0009526	0.9654	A	0.1603	0.08011	0.0005428	rs59862356	chr1	5468115	5268115	5668115	2013
4	kgp20836098	0.0006236	0.0009644	0.9654	T	0.07296	0.1429	0.001043	kgp20836098	chr4	89011660	88811660	89211660	2009
3	rs6778616	0.000626	0.0009679	0.9654	G	0.3632	0.2582	0.001245	rs6778616	chr3	98564112	98364112	98764112	2013
19	rs77851007	0.0006271	0.0009695	0.9654	A	0.0812	0.02762	0.001042	rs77851007	chr19	46813867	46613867	47013867	2013
23	rs62608511	0.0006279	0.0009706	0.9654	G	0.08761	0.1676	0.0004844	rs62608511	chrX	146153098	145953098	146353098	2013
11	rs6484306	0.0006287	0.0009717	0.9654	C	0.391	0.5275	8.71e-05	rs6484306	chr11	27496122	27296122	27696122	2013
1	rs6696790	0.0006307	0.0009746	0.9654	T	0.08478	0.1629	0.0006604	rs6696790	chr1	204711726	204511726	204911726	2013
22	rs136007	0.0006308	0.0009748	0.9654	C	0.1132	0.0522	0.00189	rs136007	chr22	45799092	45599092	45999092	2013
3	rs10934657	0.0006312	0.0009754	0.9654	C	0.1603	0.2665	0.0001744	rs10934657	chr3	124093988	123893988	124293988	2013
7	7:17373351	0.0006319	0.0009764	0.9654	T	0.02778	0.07143	0.003127	7:17373351	chr7	17373351	17173351	17573351	2009
8	GSA-rs4831628	0.0006421	0.0009912	0.9654	A	0.5406	0.4258	0.001019	rs4831628	chr8	14644945	14444945	14844945	2013
17	rs2232483	0.000647	0.0009983	0.9654	T	0.004274	0.03571	0.0007217	rs2232483	chr17	2068821	1868821	2268821	2013
2	rs77519770	0.0006494	0.001002	0.9654	C	0.01288	0.05495	0.0005554	rs77519770	chr2	41875675	41675675	42075675	2013
2	GSA-rs6434862	0.0006519	0.001005	0.9654	A	0.3034	0.2088	0.002075	rs6434862	chr2	196605277	196405277	196805277	2013
2	rs17034835	0.000658	0.001014	0.9654	T	0.3504	0.2308	0.0001817	rs17034835	chr2	68008663	67808663	68208663	2013
4	rs13128530	0.0006671	0.001027	0.9654	C	0.09307	0.03022	0.0002854	rs13128530	chr4	68663529	68463529	68863529	2013
7	rs1881625	0.0006723	0.001035	0.9654	A	0.1325	0.06044	0.0006228	rs1881625	chr7	151833463	151633463	152033463	2013
1	rs2745251	0.0006777	0.001042	0.9654	T	0.2863	0.1896	0.001265	rs2745251	chr1	21347511	21147511	21547511	2013
9	GSA-rs2502921	0.0006788	0.001044	0.9654	A	0.2436	0.3516	0.0006627	rs2502921	chr9	30804873	30604873	31004873	2013
18	GSA-rs11876144	0.0006822	0.001049	0.9654	C	0.0641	0.1346	0.0005777	rs11876144	chr18	5429608	5229608	5629608	2013
7	rs2032583	0.0006846	0.001052	0.9654	G	0.2457	0.1538	0.00114	rs2032583	chr7	87531244	87331244	87731244	2013
7	rs11983225	0.0006846	0.001052	0.9654	C	0.2457	0.1538	0.00114	rs11983225	chr7	87532203	87332203	87732203	2013
7	rs11760837	0.0006846	0.001052	0.9654	C	0.2457	0.1538	0.00114	rs11760837	chr7	87533699	87333699	87733699	2013
23	rs6618898	0.0006857	0.001054	0.9654	G	0.2201	0.3242	0.0007454	rs6618898	chrX	92183750	91983750	92383750	2013
13	rs9578420	0.0006889	0.001059	0.9654	G	0.04915	0.1099	0.001018	rs9578420	chr13	21999560	21799560	22199560	2013
6	rs17141252	0.0006918	0.001063	0.9654	T	0.4869	0.35	8.504e-05	rs17141252	chr6	5766219	5566219	5966219	2013
19	rs12980464	0.0006973	0.001071	0.9654	A	0.2564	0.3654	0.0006997	rs12980464	chr19	15532778	15332778	15732778	2013
17	GSA-rs75976970	0.0007024	0.001078	0.9654	A	0.02991	0.07967	0.0013	rs75976970	chr17	7706263	7506263	7906263	2013
7	rs1557788	0.0007036	0.00108	0.9654	A	0.3761	0.489	0.001106	rs1557788	chr7	84367229	84167229	84567229	2013
6	rs414830	0.0007067	0.001084	0.9654	G	0.4231	0.533	0.001632	rs414830	chr6	5452424	5252424	5652424	2013
2	GSA-rs10211447	0.0007073	0.001085	0.9654	T	0.25	0.1621	0.002069	rs10211447	chr2	195124516	194924516	195324516	2013
7	rs12673844	0.0007098	0.001089	0.9654	C	0.1517	0.2459	0.0006502	rs12673844	chr7	42457428	42257428	42657428	2013
7	rs2235040	0.0007099	0.001089	0.9654	T	0.2158	0.1291	0.00118	rs2235040	chr7	87536433	87336433	87736433	2013
22	GSA-rs113944715	0.0007114	0.001091	0.9654	A	0.09188	0.03297	0.0006918	rs113944715	chr22	49038990	48838990	49238990	2013
2	rs6708740	0.0007115	0.001091	0.9654	C	0.3498	0.4698	0.0004686	rs6708740	chr2	219376551	219176551	219576551	2013
7	rs59408521	0.0007125	0.001092	0.9654	G	0.2799	0.4038	0.0001702	rs59408521	chr7	153126961	152926961	153326961	2013
4	rs2321684	0.0007168	0.001099	0.9654	T	0.5235	0.4066	0.0008055	rs2321684	chr4	140865078	140665078	141065078	2013
10	GSA-rs1983864	0.0007169	0.001099	0.9654	G	0.141	0.06868	0.0009108	rs1983864	chr10	98257695	98057695	98457695	2013
1	rs10159232	0.0007179	0.0011	0.9654	A	0.4808	0.3544	0.0002548	rs10159232	chr1	87586617	87386617	87786617	2013
8	rs2680903	0.0007228	0.001107	0.9654	G	0.1538	0.07967	0.001154	rs2680903	chr8	58599774	58399774	58799774	2013
5	GSA-rs10036951	0.0007249	0.00111	0.9654	C	0.5	0.3846	0.0009032	rs10036951	chr5	127914289	127714289	128114289	2013
23	rs12857107	0.0007257	0.001111	0.9654	A	0.1709	0.2747	0.0003101	rs12857107	chrX	110683481	110483481	110883481	2013
3	rs3755724	0.0007266	0.001113	0.9654	T	0.1688	0.2637	0.0008588	rs3755724	chr3	12159405	11959405	12359405	2013
6	rs67212963	0.0007302	0.001118	0.9654	T	0.1987	0.116	0.001368	rs67212963	chr6	169296883	169096883	169496883	2013
4	GSA-rs4428301	0.0007306	0.001118	0.9654	A	0.02137	0.06593	0.001277	rs4428301	chr4	129366426	129166426	129566426	2013
10	rs4620627	0.0007316	0.00112	0.9654	G	0.1667	0.2597	0.001045	rs4620627	chr10	12475891	12275891	12675891	2013
18	GSA-rs718509	0.0007334	0.001122	0.9654	G	0.3291	0.4278	0.003575	rs718509	chr18	11056775	10856775	11256775	2013
16	GSA-rs17273968	0.0007342	0.001124	0.9654	G	0.1282	0.2253	0.0002226	rs17273968	chr16	13478713	13278713	13678713	2013
2	rs3943682	0.0007346	0.001124	0.9654	G	0.4893	0.3709	0.0006349	rs3943682	chr2	77252427	77052427	77452427	2013
6	rs2497113	0.0007366	0.001127	0.9654	G	0.5171	0.4093	0.002006	rs2497113	chr6	84057432	83857432	84257432	2013
5	rs1105788	0.000739	0.00113	0.9654	G	0.5021	0.3984	0.00287	rs1105788	chr5	160364198	160164198	160564198	2013
7	GSA-rs10256306	0.0007468	0.001141	0.9654	A	0.1469	0.2179	0.008643	rs10256306	chr7	74563246	74363246	74763246	2013
4	GSA-rs6849299	0.000747	0.001142	0.9654	G	0.25	0.3599	0.0005868	rs6849299	chr4	81197841	80997841	81397841	2013
6	rs7773151	0.0007478	0.001143	0.9654	C	0.1453	0.228	0.002132	rs7773151	chr6	142022271	141822271	142222271	2013
13	GSA-rs7325843	0.0007482	0.001144	0.9654	C	0.2906	0.3895	0.00273	rs7325843	chr13	41263018	41063018	41463018	2013
9	GSA-rs817855	0.0007486	0.001144	0.9654	A	0.02137	0.06044	0.003646	rs817855	chr9	107352156	107152156	107552156	2013
4	rs1842178	0.0007491	0.001145	0.9654	G	0.4423	0.3159	0.0002051	rs1842178	chr4	175043029	174843029	175243029	2013
2	exm2261174	0.0007496	0.001146	0.9654	G	0.2885	0.3984	0.0008756	exm2261174	chr2	21881282	21681282	22081282	2009
6	rs2764261	0.0007508	0.001147	0.9654	G	0.1175	0.2088	0.0003362	rs2764261	chr6	108606638	108406638	108806638	2013
3	rs6764193	0.0007529	0.00115	0.9654	A	0.3226	0.2225	0.001399	rs6764193	chr3	65856810	65656810	66056810	2013
6	rs1815170	0.0007537	0.001151	0.9654	T	0.05769	0.01374	0.001073	rs1815170	chr6	37009726	36809726	37209726	2013
18	rs16948118	0.0007547	0.001153	0.9654	C	0.4231	0.533	0.001632	rs16948118	chr18	5410135	5210135	5610135	2013
1	GSA-rs4949967	0.0007562	0.001155	0.9654	G	0.3248	0.2225	0.001119	rs4949967	chr1	95684761	95484761	95884761	2013
4	rs72892486	0.0007585	0.001158	0.9654	G	0.1752	0.2692	0.001086	rs72892486	chr4	112949426	112749426	113149426	2013
1	rs1222067	0.00076	0.00116	0.9654	C	0.1026	0.1823	0.0009318	rs1222067	chr1	96131945	95931945	96331945	2013
8	rs1020740	0.0007632	0.001165	0.9654	C	0.25	0.1538	0.0006982	rs1020740	chr8	132338078	132138078	132538078	2013
12	rs7299497	0.0007644	0.001167	0.9654	T	0.0812	0.02747	0.0009771	rs7299497	chr12	54933729	54733729	55133729	2013
13	rs61946448	0.000765	0.001167	0.9654	T	0.06838	0.1264	0.004411	rs61946448	chr13	23045300	22845300	23245300	2013
17	rs66863998	0.0007713	0.001176	0.9654	C	0.2597	0.3654	0.001039	rs66863998	chr17	4910108	4710108	5110108	2013
23	rs5925618	0.0007778	0.001186	0.9654	G	0.1795	0.1044	0.002385	rs5925618	chrX	22607031	22407031	22807031	2009
4	rs59757351	0.0007838	0.001194	0.9654	A	0.3355	0.2418	0.003262	rs59757351	chr4	134415876	134215876	134615876	2013
11	rs7943283	0.0007843	0.001195	0.9654	G	0.265	0.1731	0.001635	rs7943283	chr11	56897795	56697795	57097795	2013
4	rs17861768	0.0007866	0.001198	0.9654	G	0.09188	0.1648	0.001526	rs17861768	chr4	117344526	117144526	117544526	2013
15	GSA-rs1375229	0.0007868	0.001199	0.9654	G	0.3248	0.4203	0.004552	rs1375229	chr15	94816001	94616001	95016001	2013
2	rs34027347	0.0007873	0.001199	0.9654	A	0.206	0.1236	0.001712	rs34027347	chr2	52669314	52469314	52869314	2013
4	rs12501148	0.0007886	0.001201	0.9654	A	0.4116	0.5331	0.0005126	rs12501148	chr4	7264926	7064926	7464926	2013
11	GSA-rs58040466	0.0007896	0.001203	0.9654	T	0.1218	0.04945	0.0003008	rs58040466	chr11	126119425	125919425	126319425	2013
9	exm2271170	0.000794	0.001209	0.9654	T	0.3846	0.2845	0.002557	exm2271170	chr9	16127905	15927905	16327905	2009
20	rs6083536	0.0007988	0.001216	0.9654	C	0.2244	0.1374	0.001387	rs6083536	chr20	2520985	2320985	2720985	2013
25	kgp22777693	0.0008023	0.001221	0.9654	A	0.01923	0.06319	0.001073	kgp22777693	chrX	1002039	802039	1202039	2009
11	rs11600550	0.0008053	0.001225	0.9654	C	0.1752	0.09615	0.001137	rs11600550	chr11	22891718	22691718	23091718	2013
9	GSA-rs1570304	0.0008125	0.001235	0.9654	C	0.1346	0.2335	0.0002151	rs1570304	chr9	111638892	111438892	111838892	2013
9	rs62638716	0.0008142	0.001238	0.9654	A	0	0.01923	0.002589	rs62638716	chr9	130878561	130678561	131078561	2013
11	GSA-rs2513541	0.0008152	0.001239	0.9654	T	0.1688	0.2707	0.0003783	rs2513541	chr11	131383678	131183678	131583678	2013
14	GSA-rs17182867	0.0008155	0.001239	0.9654	T	0.4359	0.3187	0.0005657	rs17182867	chr14	21874259	21674259	22074259	2013
6	rs335419	0.0008245	0.001252	0.9654	T	0.2222	0.3379	0.000202	rs335419	chr6	155353194	155153194	155553194	2013
1	GSA-rs9435429	0.0008295	0.001259	0.9654	G	0.1731	0.2857	0.0001062	rs9435429	chr1	106984234	106784234	107184234	2013
23	rs5929935	0.0008315	0.001262	0.9654	G	0.07543	0.1464	0.001036	rs5929935	chrX	138537690	138337690	138737690	2013
16	GSA-rs56183253	0.000832	0.001263	0.9654	C	0.1453	0.07692	0.002196	rs56183253	chr16	78372938	78172938	78572938	2013
4	rs1440588	0.0008321	0.001263	0.9654	G	0.2457	0.1547	0.001302	rs1440588	chr4	161842861	161642861	162042861	2013
2	rs448375	0.0008323	0.001263	0.9654	G	0.1218	0.1978	0.002657	rs448375	chr2	225064780	224864780	225264780	2013
23	rs17343164	0.0008331	0.001264	0.9654	G	0.05556	0.01099	0.0006249	rs17343164	chrX	22646768	22446768	22846768	2013
6	GSA-rs811584	0.0008346	0.001267	0.9654	C	0.06838	0.1209	0.009116	rs811584	chr6	119062024	118862024	119262024	2013
6	GSA-rs55810806	0.0008346	0.001267	0.9654	T	0.06838	0.1209	0.009116	rs55810806	chr6	119064878	118864878	119264878	2013
5	rs4976584	0.0008375	0.001271	0.9654	A	0.0641	0.1236	0.002939	rs4976584	chr5	168224274	168024274	168424274	2013
4	rs1441922	0.0008401	0.001274	0.9654	A	0.3782	0.2802	0.00298	rs1441922	chr4	76238546	76038546	76438546	2013
17	rs7217144	0.0008403	0.001275	0.9654	A	0.04701	0.1099	0.000612	rs7217144	chr17	2018940	1818940	2218940	2013
16	rs7498939	0.0008406	0.001275	0.9654	A	0.1944	0.1099	0.0008943	rs7498939	chr16	74115174	73915174	74315174	2013
14	GSA-rs35068665	0.0008426	0.001278	0.9654	G	0.00641	0.04121	0.0006204	rs35068665	chr14	101332049	101132049	101532049	2013
9	rs143503466	0.0008429	0.001278	0.9654	A	0.01496	0.0467	0.006647	rs143503466	chr9	122826777	122626777	123026777	2013
12	GSA-rs4149126	0.000843	0.001278	0.9654	T	0.05128	0.1154	0.0006886	rs4149126	chr12	20864101	20664101	21064101	2013
23	rs2315828	0.0008436	0.001279	0.9654	A	0.5461	0.4205	0.0003986	rs2315828	chrX	97153753	96953753	97353753	2013
4	rs17048841	0.0008449	0.001281	0.9654	C	0.1859	0.1044	0.001099	rs17048841	chr4	116823193	116623193	117023193	2013
3	rs2175184	0.0008453	0.001282	0.9654	G	0.2158	0.3111	0.001871	rs2175184	chr3	87546462	87346462	87746462	2013
2	GSA-rs73913314	0.0008525	0.001292	0.9654	A	0.05983	0.01099	0.000279	rs73913314	chr2	3319445	3119445	3519445	2013
23	kgp22762187	0.0008552	0.001296	0.9654	T	0.02137	0.06593	0.001277	kgp22762187	chrX	91085908	90885908	91285908	2009
9	GSA-rs10964459	0.0008584	0.0013	0.9654	G	0.09615	0.1703	0.001521	rs10964459	chr9	20187934	19987934	20387934	2013
5	rs2133726	0.0008616	0.001305	0.9654	T	0.1795	0.2775	0.0007469	rs2133726	chr5	166336254	166136254	166536254	2013
10	rs2792695	0.0008625	0.001306	0.9654	C	0.2756	0.3901	0.0004739	rs2792695	chr10	112070552	111870552	112270552	2013
23	rs4824312	0.0008709	0.001318	0.9654	T	0.1603	0.08516	0.00127	rs4824312	chrX	147711890	147511890	147911890	2013
22	rs759406	0.0008763	0.001326	0.9654	T	0.359	0.25	0.000758	rs759406	chr22	18930234	18730234	19130234	2013
5	rs6864938	0.0008797	0.00133	0.9654	A	0.06197	0.1291	0.0008518	rs6864938	chr5	156586343	156386343	156786343	2013
2	GSA-rs17035342	0.0008822	0.001334	0.9654	C	0.3889	0.5221	0.0001292	rs17035342	chr2	68351884	68151884	68551884	2013
5	GSA-rs34159951	0.0008826	0.001335	0.9654	A	0	0.03022	0.0001532	rs34159951	chr5	45689344	45489344	45889344	2013
5	GSA-rs72749824	0.0008826	0.001335	0.9654	A	0	0.03022	0.0001532	rs72749824	chr5	50316939	50116939	50516939	2013
7	rs4148739	0.0008827	0.001335	0.9654	C	0.2457	0.1547	0.001302	rs4148739	chr7	87531732	87331732	87731732	2013
6	rs12206652	0.000889	0.001344	0.9654	G	0.1459	0.2335	0.001241	rs12206652	chr6	34098204	33898204	34298204	2013
8	rs187206430	0.0008914	0.001347	0.9654	C	0.08333	0.03571	0.004879	rs187206430	chr8	8318554	8118554	8518554	2013
13	GSA-rs74242792	0.0008917	0.001347	0.9654	C	0.01709	0.05769	0.001539	rs74242792	chr13	40799336	40599336	40999336	2013
17	rs2190723	0.0008925	0.001349	0.9654	A	0.4231	0.3159	0.001552	rs2190723	chr17	11016141	10816141	11216141	2013
8	rs6987301	0.0008934	0.00135	0.9654	A	0.2799	0.1813	0.0009042	rs6987301	chr8	90959745	90759745	91159745	2013
2	rs13428254	0.0008987	0.001357	0.9654	G	0.141	0.07143	0.001496	rs13428254	chr2	2693055	2493055	2893055	2013
19	GSA-rs116515950	0.000899	0.001358	0.9654	A	0.1068	0.03846	0.0002409	rs116515950	chr19	51294530	51094530	51494530	2013
1	rs34099250	0.0009002	0.001359	0.9654	G	0.438	0.5357	0.00515	rs34099250	chr1	235056161	234856161	235256161	2013
12	rs11060239	0.000902	0.001362	0.9654	C	0.1266	0.2143	0.0007347	rs11060239	chr12	129294627	129094627	129494627	2013
11	GSA-rs273585	0.0009039	0.001365	0.9654	G	0.1026	0.04396	0.001649	rs273585	chr11	30866170	30666170	31066170	2013
3	rs34785698	0.0009067	0.001369	0.9654	G	0.04915	0.01099	0.002062	rs34785698	chr3	124666006	124466006	124866006	2013
6	rs9341603	0.0009107	0.001374	0.9654	T	0.203	0.3022	0.0009866	rs9341603	chr6	76825235	76625235	77025235	2013
18	rs73484134	0.000912	0.001376	0.9654	T	0.09615	0.1841	0.0002282	rs73484134	chr18	75310130	75110130	75510130	2013
14	rs733290	0.0009122	0.001376	0.9654	C	0.4915	0.3599	0.0001456	rs733290	chr14	21909030	21709030	22109030	2013
1	1:94513859	0.0009208	0.001389	0.9654	G	0.06197	0.1126	0.009001	1:94513859	chr1	94513859	94313859	94713859	2013
5	rs166278	0.0009273	0.001398	0.9654	T	0.2778	0.3901	0.0006112	rs166278	chr5	82964088	82764088	83164088	2013
1	rs74594071	0.0009348	0.001408	0.9654	T	0	0.01923	0.002589	rs74594071	chr1	19787490	19587490	19987490	2013
8	rs3779998	0.0009356	0.001409	0.9654	C	0.2198	0.3194	0.001281	rs3779998	chr8	58822929	58622929	59022929	2013
1	rs2817642	0.0009364	0.00141	0.9654	C	0.3803	0.4918	0.001277	rs2817642	chr1	11584115	11384115	11784115	2013
22	rs712964	0.0009428	0.00142	0.9654	T	0.1774	0.2857	0.0002035	rs712964	chr22	19168603	18968603	19368603	2013
13	GSA-rs73246381	0.0009515	0.001432	0.9654	G	0	0.02198	0.00127	rs73246381	chr13	83192056	82992056	83392056	2013
3	rs62292971	0.0009518	0.001432	0.9654	T	0.0406	0.0989	0.0007861	rs62292971	chr3	182597086	182397086	182797086	2013
16	rs75061690	0.0009549	0.001437	0.9654	G	0.08974	0.1538	0.004435	rs75061690	chr16	88404667	88204667	88604667	2013
6	rs3734838	0.0009556	0.001438	0.9654	A	0.03632	0.09341	0.0006615	rs3734838	chr6	30112453	29912453	30312453	2013
6	rs9261520	0.0009556	0.001438	0.9654	T	0.03632	0.09341	0.0006615	rs9261520	chr6	30149446	29949446	30349446	2013
6	seq-rs115176581	0.0009556	0.001438	0.9654	A	0.03632	0.09341	0.0006615	rs115176581	chr6	30112553	29912553	30312553	2013
14	rs946630	0.0009588	0.001442	0.9654	G	0.1395	0.2293	0.0008219	rs946630	chr14	33972658	33772658	34172658	2013
7	rs10267374	0.0009614	0.001446	0.9654	T	0.1474	0.2418	0.0005618	rs10267374	chr7	88931112	88731112	89131112	2013
3	rs2243123	0.0009615	0.001446	0.9654	C	0.1474	0.06868	0.0003712	rs2243123	chr3	159991863	159791863	160191863	2013
11	GSA-rs74829505	0.0009661	0.001452	0.9654	A	0.1218	0.1951	0.003667	rs74829505	chr11	95505379	95305379	95705379	2013
4	rs13104530	0.0009694	0.001457	0.9654	A	0.2735	0.3681	0.003555	rs13104530	chr4	189146481	188946481	189346481	2013
13	rs9541854	0.0009751	0.001465	0.9654	T	0.1517	0.2473	0.0005388	rs9541854	chr13	69247158	69047158	69447158	2013
6	rs9487643	0.0009781	0.001469	0.9654	G	0.02137	0.06868	0.0007447	rs9487643	chr6	111433110	111233110	111633110	2013
7	rs496821	0.0009837	0.001477	0.9654	T	0.3013	0.4171	0.0005285	rs496821	chr7	153107887	152907887	153307887	2013
1	rs9660567	0.0009891	0.001485	0.9654	A	0.1538	0.07182	0.0002818	rs9660567	chr1	117198417	116998417	117398417	2013
6	rs3132130	0.0009916	0.001488	0.9654	C	0.04487	0.1016	0.001422	rs3132130	chr6	30059674	29859674	30259674	2013
6	rs9261269	0.0009916	0.001488	0.9654	A	0.04487	0.1022	0.001313	rs9261269	chr6	30062336	29862336	30262336	2013
6	rs3121595	0.0009916	0.001488	0.9654	C	0.04487	0.1016	0.001422	rs3121595	chr6	30065694	29865694	30265694	2013
3	rs482953	0.0009926	0.00149	0.9654	C	0.09402	0.03297	0.0004893	rs482953	chr3	153765169	153565169	153965169	2013
1	rs1173842	0.000996	0.001494	0.9654	A	0.2393	0.3434	0.0009669	rs1173842	chr1	245372559	245172559	245572559	2013
2	rs12998083	0.0009962	0.001495	0.9654	A	0.1218	0.1989	0.002363	rs12998083	chr2	150819659	150619659	151019659	2013
6	rs9486126	0.0009989	0.001498	0.9654	C	0.4038	0.5192	0.0009133	rs9486126	chr6	96394590	96194590	96594590	2013
3	rs522491	0.001	0.0015	0.9654	A	0.5022	0.3883	0.001143	rs522491	chr3	13025548	12825548	13225548	2013
8	rs2979823	0.001001	0.001501	0.9654	G	0.2564	0.1676	0.002065	rs2979823	chr8	25179976	24979976	25379976	2013
17	rs4793018	0.001001	0.001502	0.9654	C	0.2821	0.3819	0.002306	rs4793018	chr17	43703700	43503700	43903700	2013
6	rs9471088	0.001006	0.001509	0.9654	T	0.5363	0.4423	0.00713	rs9471088	chr6	39394198	39194198	39594198	2013
20	20:61301427	0.001008	0.001511	0.9654	G	0.002137	0.02486	0.002921	20:61301427	chr20	61301427	61101427	61501427	2009
6	rs60785820	0.001022	0.00153	0.9654	A	0.04487	0.008242	0.001739	rs60785820	chr6	30367221	30167221	30567221	2013
6	rs7744914	0.001022	0.00153	0.9654	A	0.04487	0.008242	0.001739	rs7744914	chr6	30380469	30180469	30580469	2013
4	rs77641116	0.001022	0.001531	0.9654	A	0.002137	0.03297	0.0003749	rs77641116	chr4	163372693	163172693	163572693	2013
8	GSA-rs10100191	0.001024	0.001534	0.9654	G	0.3803	0.2762	0.001626	rs10100191	chr8	96546933	96346933	96746933	2013
1	rs34408707	0.001024	0.001534	0.9654	A	0.05128	0.01099	0.001388	rs34408707	chr1	203092242	202892242	203292242	2013
11	rs2403587	0.001029	0.00154	0.9654	T	0.2756	0.3819	0.001143	rs2403587	chr11	20382959	20182959	20582959	2013
15	exm2267842	0.001029	0.001541	0.9654	A	0.3205	0.4368	0.0005728	exm2267842	chr15	69100577	68900577	69300577	2009
3	rs11718666	0.00103	0.001542	0.9654	A	0.109	0.04945	0.002012	rs11718666	chr3	152542914	152342914	152742914	2013
1	rs6684566	0.001035	0.001549	0.9654	C	0.1689	0.2574	0.002589	rs6684566	chr1	238060194	237860194	238260194	2013
15	rs12906283	0.001038	0.001553	0.9654	C	0.297	0.2033	0.002123	rs12906283	chr15	94738259	94538259	94938259	2013
10	rs10823129	0.001043	0.001561	0.9654	G	0.3782	0.5055	0.0002378	rs10823129	chr10	51526635	51326635	51726635	2013
13	GSA-rs17058274	0.001046	0.001565	0.9654	A	0.2189	0.3104	0.002813	rs17058274	chr13	60592645	60392645	60792645	2013
11	rs10501729	0.001046	0.001564	0.9654	T	0.1581	0.08516	0.001669	rs10501729	chr11	90643896	90443896	90843896	2013
6	rs7740616	0.001048	0.001568	0.9654	A	0.4487	0.3324	0.0006738	rs7740616	chr6	67167339	66967339	67367339	2013
17	rs56280982	0.001049	0.001569	0.9654	C	0.25	0.1566	0.001015	rs56280982	chr17	5902215	5702215	6102215	2013
7	rs490356	0.001049	0.001568	0.9654	G	0.2854	0.395	0.0009029	rs490356	chr7	153107187	152907187	153307187	2013
16	rs2889517	0.00105	0.00157	0.9654	T	0.359	0.478	0.0005359	rs2889517	chr16	16088098	15888098	16288098	2013
23	rs12853676	0.001051	0.001571	0.9654	G	0.2205	0.3066	0.005167	rs12853676	chrX	116643130	116443130	116843130	2013
17	rs34494368	0.001055	0.001577	0.9654	T	0.3419	0.2363	0.0009273	rs34494368	chr17	73456068	73256068	73656068	2013
1	rs2391467	0.001058	0.001582	0.9654	G	0.3825	0.4863	0.002686	rs2391467	chr1	94384886	94184886	94584886	2013
6	rs996301	0.001058	0.001581	0.9654	T	0.2521	0.1703	0.00447	rs996301	chr6	164910868	164710868	165110868	2013
3	rs9833643	0.001062	0.001587	0.9654	T	0.07479	0.1464	0.0008883	rs9833643	chr3	172840546	172640546	173040546	2013
5	rs2107511	0.001069	0.001597	0.9654	A	0.2949	0.3901	0.003926	rs2107511	chr5	131116232	130916232	131316232	2013
22	GSA-rs55741555	0.001072	0.001601	0.9654	T	0.0235	0.07418	0.0005148	rs55741555	chr22	21721887	21521887	21921887	2013
7	GSA-rs115925323	0.001072	0.0016	0.9654	A	0.0235	0	0.003235	rs115925323	chr7	51689073	51489073	51889073	2013
19	rs2001342	0.001074	0.001603	0.9654	T	0.3782	0.2747	0.001678	rs2001342	chr19	49757510	49557510	49957510	2013
9	GSA-rs955117	0.00108	0.001613	0.9654	A	0.1261	0.2115	0.000942	rs955117	chr9	117976786	117776786	118176786	2013
3	rs1390241	0.001081	0.001614	0.9654	C	0.3391	0.4451	0.00185	rs1390241	chr3	65787335	65587335	65987335	2013
7	rs17333262	0.001082	0.001615	0.9654	T	0.07265	0.1511	0.0002813	rs17333262	chr7	8552472	8352472	8752472	2013
12	rs837957	0.001083	0.001615	0.9654	T	0.2415	0.1566	0.0026	rs837957	chr12	124612483	124412483	124812483	2013
14	rs4982082	0.001086	0.001621	0.9654	G	0.4142	0.3132	0.002789	rs4982082	chr14	33352546	33152546	33552546	2013
23	ilmnseq_exm2268572	0.001089	0.001624	0.9654	A	0.1816	0.2802	0.0007253	exm2268572	chrX	19229652	19029652	19429652	2013
9	GSA-rs12002017	0.00109	0.001626	0.9654	A	0.3419	0.4478	0.001871	rs12002017	chr9	90554538	90354538	90754538	2013
2	rs11688442	0.00109	0.001626	0.9654	G	0.156	0.2582	0.000259	rs11688442	chr2	109081056	108881056	109281056	2013
17	rs4791435	0.001091	0.001628	0.9654	G	0.3825	0.2802	0.001975	rs4791435	chr17	11000015	10800015	11200015	2013
17	rs17806303	0.001092	0.001629	0.9654	C	0.01709	0.05769	0.001539	rs17806303	chr17	32504609	32304609	32704609	2013
11	rs7944619	0.001094	0.001631	0.9654	T	0.3226	0.2198	0.001013	rs7944619	chr11	87804481	87604481	88004481	2013
16	rs885064	0.001095	0.001633	0.9654	T	0.3892	0.2739	0.001192	rs885064	chr16	88561318	88361318	88761318	2013
1	GSA-rs114855850	0.001098	0.001637	0.9654	T	0.006438	0.03846	0.001229	rs114855850	chr1	27800347	27600347	28000347	2013
6	rs6928431	0.001099	0.001639	0.9654	A	0.04526	0.1016	0.001602	rs6928431	chr6	30056606	29856606	30256606	2013
12	rs77604945	0.0011	0.001639	0.9654	A	0.1004	0.1758	0.001509	rs77604945	chr12	101978663	101778663	102178663	2013
6	GSA-rs78050237	0.001107	0.00165	0.9654	C	0.03648	0.07967	0.006965	rs78050237	chr6	118991483	118791483	119191483	2013
7	rs35820472	0.001112	0.001657	0.9654	A	0.1761	0.1006	0.002206	rs35820472	chr7	134848096	134648096	135048096	2013
4	rs79347970	0.001113	0.001658	0.9654	C	0.01709	0.0522	0.004587	rs79347970	chr4	58794118	58594118	58994118	2013
19	rs322129	0.001117	0.001663	0.9654	T	0.3162	0.2143	0.001039	rs322129	chr19	11290428	11090428	11490428	2013
1	rs967244	0.001118	0.001666	0.9654	G	0.2735	0.1731	0.0006332	rs967244	chr1	231812899	231612899	232012899	2013
8	GSA-rs4872291	0.001119	0.001666	0.9654	A	0.1325	0.2115	0.002424	rs4872291	chr8	25141913	24941913	25341913	2013
21	rs2253319	0.001119	0.001666	0.9654	C	0.4209	0.5192	0.004799	rs2253319	chr21	34815748	34615748	35015748	2013
3	rs16824794	0.00112	0.001667	0.9654	T	0.04915	0.1016	0.003681	rs16824794	chr3	155283657	155083657	155483657	2013
10	GSA-rs7093644	0.001124	0.001673	0.9654	T	0.2436	0.1593	0.002912	rs7093644	chr10	70166531	69966531	70366531	2013
3	rs28535432	0.001125	0.001674	0.9654	C	0.3761	0.4725	0.00514	rs28535432	chr3	114647693	114447693	114847693	2013
5	rs4869272	0.001128	0.001678	0.9654	C	0.1517	0.228	0.004929	rs4869272	chr5	96203743	96003743	96403743	2013
9	rs15676	0.001133	0.001685	0.9654	A	0.3162	0.217	0.001437	rs15676	chr9	128809747	128609747	129009747	2013
15	rs75194827	0.001148	0.001706	0.9654	T	0.05128	0.1099	0.001649	rs75194827	chr15	40063724	39863724	40263724	2013
22	GSA-rs16984675	0.00115	0.001709	0.9654	T	0.1197	0.1923	0.003733	rs16984675	chr22	22154038	21954038	22354038	2013
2	GSA-rs1833218	0.001151	0.001711	0.9654	C	0.2885	0.1934	0.001631	rs1833218	chr2	67064808	66864808	67264808	2013
14	rs10147611	0.001152	0.001713	0.9654	G	0.3611	0.4643	0.002647	rs10147611	chr14	53768034	53568034	53968034	2013
16	rs12930291	0.001157	0.001719	0.9654	C	0.1416	0.07692	0.003511	rs12930291	chr16	73432845	73232845	73632845	2013
15	rs2572164	0.001159	0.001722	0.9654	T	0.2564	0.3709	0.0003812	rs2572164	chr15	33494621	33294621	33694621	2013
16	GSA-rs4786939	0.001169	0.001736	0.9654	A	0.3846	0.2747	0.0008756	rs4786939	chr16	6820057	6620057	7020057	2013
3	rs7430346	0.00117	0.001738	0.9654	T	0.5171	0.4093	0.002006	rs7430346	chr3	98544045	98344045	98744045	2013
1	GSA-rs1403243	0.001175	0.001745	0.9654	C	0.2179	0.3104	0.002501	rs1403243	chr1	76865622	76665622	77065622	2013
18	rs4389200	0.001177	0.001746	0.9654	T	0.1688	0.2582	0.001613	rs4389200	chr18	34404427	34204427	34604427	2013
22	rs5993423	0.001179	0.00175	0.9654	G	0.3581	0.25	0.0009124	rs5993423	chr22	18930500	18730500	19130500	2013
23	rs16981043	0.001181	0.001752	0.9654	G	0.2115	0.1264	0.001316	rs16981043	chrX	4646359	4446359	4846359	2013
11	GSA-rs76868057	0.001182	0.001754	0.9654	G	0.05769	0.1154	0.002759	rs76868057	chr11	134922152	134722152	135122152	2013
14	rs1245199	0.001183	0.001755	0.9654	C	0.1395	0.06593	0.000678	rs1245199	chr14	26524751	26324751	26724751	2013
9	GSA-rs10116204	0.001183	0.001755	0.9654	T	0.3953	0.2995	0.004116	rs10116204	chr9	71438061	71238061	71638061	2013
4	rs17490687	0.001183	0.001755	0.9654	T	0.1175	0.1978	0.001403	rs17490687	chr4	96005543	95805543	96205543	2013
16	rs74014121	0.001185	0.001759	0.9654	T	0.02991	0.07967	0.0013	rs74014121	chr16	25843229	25643229	26043229	2013
3	rs9845510	0.001185	0.001759	0.9654	C	0.2179	0.1236	0.0004021	rs9845510	chr3	186477533	186277533	186677533	2013
1	rs6586363	0.001187	0.001761	0.9654	A	0.07511	0.1401	0.002295	rs6586363	chr1	234007428	233807428	234207428	2013
2	rs920094	0.001195	0.001772	0.9654	T	0.3697	0.478	0.001662	rs920094	chr2	178074077	177874077	178274077	2013
18	GSA-rs78832488	0.001198	0.001776	0.9654	G	0.00641	0.03571	0.002264	rs78832488	chr18	76288421	76088421	76488421	2013
18	GSA-rs117842739	0.001198	0.001776	0.9654	G	0.00641	0.03571	0.002264	rs117842739	chr18	76288532	76088532	76488532	2013
11	rs2923084	0.0012	0.001779	0.9654	G	0.3141	0.4176	0.002029	rs2923084	chr11	10367234	10167234	10567234	2013
3	rs7623169	0.001205	0.001785	0.9654	T	0.1432	0.07143	0.001124	rs7623169	chr3	24809054	24609054	25009054	2013
6	rs648396	0.001214	0.001799	0.9654	G	0.4421	0.5495	0.002132	rs648396	chr6	138092131	137892131	138292131	2013
2	rs1527485	0.001215	0.001799	0.9654	T	0.1774	0.25	0.01058	rs1527485	chr2	19201133	19001133	19401133	2013
9	GSA-rs10968823	0.001226	0.001814	0.9654	A	0.3996	0.2912	0.001169	rs10968823	chr9	28912687	28712687	29112687	2013
5	rs78450884	0.001231	0.001822	0.9654	C	0.04292	0.09392	0.003193	rs78450884	chr5	121157218	120957218	121357218	2013
16	GSA-rs115758417	0.001236	0.001828	0.9654	T	0.04701	0.09615	0.005374	rs115758417	chr16	22953792	22753792	23153792	2013
5	GSA-rs966088	0.001242	0.001836	0.9654	C	0.3462	0.4698	0.0003055	rs966088	chr5	153029469	152829469	153229469	2013
8	rs77263196	0.001244	0.00184	0.9654	C	0.0406	0.09615	0.001252	rs77263196	chr8	6590892	6390892	6790892	2013
6	rs4270819	0.001247	0.001844	0.9654	C	0.4338	0.3297	0.002241	rs4270819	chr6	103929780	103729780	104129780	2013
10	rs1577226	0.00125	0.001849	0.9654	T	0.4167	0.5302	0.001126	rs1577226	chr10	104566915	104366915	104766915	2013
13	rs9585460	0.001252	0.001851	0.9654	G	0.344	0.25	0.003415	rs9585460	chr13	100562267	100362267	100762267	2013
23	rs111639388	0.001254	0.001853	0.9654	G	0.4359	0.3324	0.002406	rs111639388	chrX	72358644	72158644	72558644	2013
10	GSA-rs7477555	0.001255	0.001855	0.9654	G	0.04274	0.005495	0.0008963	rs7477555	chr10	19788927	19588927	19988927	2013
14	rs762039	0.001263	0.001866	0.9654	C	0.2094	0.2967	0.003801	rs762039	chr14	20766691	20566691	20966691	2013
5	rs6871123	0.001263	0.001867	0.9654	G	0.2628	0.3571	0.003347	rs6871123	chr5	32032730	31832730	32232730	2013
3	rs141371381	0.001264	0.001867	0.9654	A	0.06197	0.01648	0.001187	rs141371381	chr3	46521578	46321578	46721578	2013
5	rs2163783	0.001264	0.001868	0.9654	T	0.3034	0.4144	0.0009025	rs2163783	chr5	169012470	168812470	169212470	2013
13	rs9576045	0.001265	0.001869	0.9654	T	0.5107	0.3819	0.000214	rs9576045	chr13	31408779	31208779	31608779	2013
9	GSA-rs10125637	0.001265	0.001869	0.9654	G	0.3098	0.217	0.002757	rs10125637	chr9	78920991	78720991	79120991	2013
19	GSA-rs116049570	0.001266	0.00187	0.9654	C	0.235	0.1409	0.0006686	rs116049570	chr19	11463627	11263627	11663627	2013
16	GSA-rs117147010	0.001275	0.001883	0.9654	T	0.09188	0.04121	0.004411	rs117147010	chr16	12503077	12303077	12703077	2013
1	rs112644623	0.001275	0.001883	0.9654	A	0.1389	0.07418	0.00315	rs112644623	chr1	87585077	87385077	87785077	2013
4	rs13113148	0.001276	0.001884	0.9654	C	0.03219	0.07418	0.006172	rs13113148	chr4	59392289	59192289	59592289	2013
1	GSA-rs72655018	0.001279	0.001888	0.9654	T	0	0.02198	0.00127	rs72655018	chr1	27630630	27430630	27830630	2013
2	rs1031264	0.00128	0.001889	0.9654	C	0.1659	0.09392	0.0026	rs1031264	chr2	223181163	222981163	223381163	2013
6	GSA-rs117472494	0.001281	0.001891	0.9654	T	0.02778	0.07143	0.003127	rs117472494	chr6	118734078	118534078	118934078	2013
2	rs4675874	0.001282	0.001892	0.9654	G	0.008547	0.04396	0.0009399	rs4675874	chr2	240880378	240680378	241080378	2013
20	GSA-rs78903417	0.001283	0.001894	0.9654	G	0.1218	0.05525	0.001049	rs78903417	chr20	24089430	23889430	24289430	2013
6	rs745091	0.001285	0.001896	0.9654	G	0.203	0.1264	0.003475	rs745091	chr6	133337160	133137160	133537160	2013
6	rs666769	0.001291	0.001905	0.9654	T	0.438	0.5467	0.001863	rs666769	chr6	138093949	137893949	138293949	2013
12	rs112263913	0.001296	0.001912	0.9654	C	0.5366	0.4423	0.007047	rs112263913	chr12	42804591	42604591	43004591	2013
10	rs2698761	0.001296	0.001912	0.9654	C	0.4551	0.3462	0.001506	rs2698761	chr10	48383674	48183674	48583674	2013
3	rs6769680	0.001297	0.001914	0.9654	A	0.1325	0.2033	0.006137	rs6769680	chr3	64047084	63847084	64247084	2013
1	rs35695590	0.001297	0.001913	0.9654	T	0.02146	0.06354	0.002139	rs35695590	chr1	240763851	240563851	240963851	2013
16	rs2646108	0.001298	0.001914	0.9654	A	0.1987	0.2885	0.002565	rs2646108	chr16	84907457	84707457	85107457	2013
2	rs13020302	0.0013	0.001916	0.9654	C	0.008547	0.04396	0.0009399	rs13020302	chr2	107983253	107783253	108183253	2013
2	rs72947712	0.0013	0.001917	0.9654	T	0.06624	0.1291	0.002022	rs72947712	chr2	216949607	216749607	217149607	2013
18	rs7238197	0.001303	0.001922	0.9654	T	0.07692	0.1429	0.002157	rs7238197	chr18	76367293	76167293	76567293	2013
15	rs28457116	0.001303	0.001921	0.9654	T	0.3376	0.4451	0.001576	rs28457116	chr15	97884175	97684175	98084175	2013
1	rs7548900	0.001304	0.001923	0.9654	A	0.2607	0.3489	0.005843	rs7548900	chr1	17296158	17096158	17496158	2013
5	rs3934571	0.001305	0.001924	0.9654	T	0.118	0.2072	0.0004688	rs3934571	chr5	174802895	174602895	175002895	2013
9	GSA-rs7858319	0.001306	0.001926	0.9654	C	0.2222	0.1319	0.0008203	rs7858319	chr9	5564747	5364747	5764747	2013
1	exm2265017	0.001307	0.001927	0.9654	G	0.3632	0.2624	0.002004	exm2265017	chr1	70750558	70550558	70950558	2013
7	rs2267818	0.001308	0.001928	0.9654	G	0.1688	0.239	0.01194	rs2267818	chr7	74561648	74361648	74761648	2013
7	GSA-rs62452706	0.001311	0.001932	0.9654	G	0.0279	0	0.00136	rs62452706	chr7	46527073	46327073	46727073	2013
1	rs77606680	0.001314	0.001937	0.9654	T	0.02137	0.06593	0.001277	rs77606680	chr1	100732028	100532028	100932028	2013
20	rs6085948	0.001316	0.001939	0.9654	A	0.1902	0.1154	0.003303	rs6085948	chr20	7252702	7052702	7452702	2013
18	rs116983519	0.001317	0.001941	0.9654	A	0.006438	0.03571	0.002335	rs116983519	chr18	76288387	76088387	76488387	2013
1	rs77802745	0.001321	0.001946	0.9654	G	0.1282	0.06319	0.001906	rs77802745	chr1	204360682	204160682	204560682	2013
22	rs1555242	0.001328	0.001956	0.9654	G	0.1631	0.2582	0.0007501	rs1555242	chr22	43383860	43183860	43583860	2013
13	rs1040986	0.001331	0.00196	0.9654	T	0.391	0.5028	0.00132	rs1040986	chr13	27477214	27277214	27677214	2013
5	rs34729826	0.001332	0.001961	0.9654	G	0.2714	0.1758	0.001151	rs34729826	chr5	73894348	73694348	74094348	2013
11	rs61733056	0.001333	0.001963	0.9654	T	0.2585	0.1648	0.001154	rs61733056	chr11	7669641	7469641	7869641	2013
3	rs9872064	0.001333	0.001962	0.9654	G	0.3034	0.2088	0.002075	rs9872064	chr3	26761428	26561428	26961428	2013
2	rs6743414	0.001335	0.001965	0.9654	A	0.2436	0.1511	0.001004	rs6743414	chr2	49196931	48996931	49396931	2013
11	rs2034387	0.001337	0.001968	0.9654	T	0.203	0.3022	0.0009866	rs2034387	chr11	131461124	131261124	131661124	2013
19	rs74690669	0.001345	0.001979	0.9654	A	0.004274	0.03022	0.002757	rs74690669	chr19	50423669	50223669	50623669	2013
6	GSA-rs9355270	0.001347	0.001982	0.9654	T	0.4359	0.5467	0.001511	rs9355270	chr6	157497315	157297315	157697315	2013
12	exm987247	0.001352	0.001988	0.9654	G	0.004274	0.03022	0.002757	exm987247	chr12	14996026	14796026	15196026	2009
17	GSA-rs1800309	0.001352	0.001989	0.9654	A	0.04487	0.01099	0.004512	rs1800309	chr17	80113241	79913241	80313241	2013
17	rs73286795	0.001357	0.001996	0.9654	A	0.2521	0.1575	0.0009129	rs73286795	chr17	33834535	33634535	34034535	2013
6	rs1626392	0.001359	0.001999	0.9654	T	0.2094	0.3214	0.0002504	rs1626392	chr6	29764466	29564466	29964466	2013
12	rs343092	0.001359	0.001999	0.9654	G	0.09402	0.1731	0.0007266	rs343092	chr12	65857159	65657159	66057159	2013
16	rs394293	0.001359	0.001999	0.9654	T	0.188	0.1071	0.001289	rs394293	chr16	84503383	84303383	84703383	2013
1	GSA-rs3916544	0.001361	0.002001	0.9654	T	0.4849	0.3791	0.002326	rs3916544	chr1	14810011	14610011	15010011	2013
2	GSA-rs842760	0.001367	0.002009	0.9654	C	0.2457	0.1648	0.00451	rs842760	chr2	60650997	60450997	60850997	2013
6	rs1736911	0.001371	0.002015	0.9654	T	0.04274	0.0989	0.001338	rs1736911	chr6	29737994	29537994	29937994	2013
6	rs1320552	0.001371	0.002014	0.9654	G	0.547	0.4341	0.001228	rs1320552	chr6	120646914	120446914	120846914	2013
6	GSA-rs4946505	0.001371	0.002014	0.9654	A	0.453	0.5659	0.001228	rs4946505	chr6	120647414	120447414	120847414	2013
6	GSA-rs1933865	0.001371	0.002014	0.9654	T	0.547	0.4341	0.001228	rs1933865	chr6	120657342	120457342	120857342	2013
2	GSA-rs11903779	0.001373	0.002017	0.9654	C	0.05983	0.1154	0.004186	rs11903779	chr2	19318933	19118933	19518933	2013
1	JHU_1.207673413	0.001374	0.002019	0.9654	A	0.09615	0.1648	0.003082	JHU_1.207673413	chr1	207673414	207473414	207873414	2013
4	rs35700784	0.001376	0.002022	0.9654	A	0.1432	0.2335	0.0008203	rs35700784	chr4	114308316	114108316	114508316	2013
2	rs7424403	0.001376	0.002022	0.9654	A	0.2991	0.3984	0.002778	rs7424403	chr2	138213440	138013440	138413440	2013
7	GSA-rs62475243	0.00138	0.002028	0.9654	T	0.09402	0.1593	0.004372	rs62475243	chr7	154707171	154507171	154907171	2013
11	rs12787328	0.001382	0.00203	0.9654	T	0.2393	0.1511	0.001624	rs12787328	chr11	130239405	130039405	130439405	2013
17	rs4795729	0.001384	0.002033	0.9654	A	0.4209	0.5385	0.0007561	rs4795729	chr17	32984857	32784857	33184857	2013
14	rs12590098	0.001385	0.002034	0.9654	A	0.03205	0.07692	0.003729	rs12590098	chr14	101639109	101439109	101839109	2013
18	rs7228847	0.001388	0.002039	0.9654	C	0.04701	0.09341	0.008054	rs7228847	chr18	48943772	48743772	49143772	2013
6	rs35210001	0.00139	0.00204	0.9654	A	0.2756	0.3736	0.002618	rs35210001	chr6	11236176	11036176	11436176	2013
25	JHU_X.178482	0.001396	0.002049	0.9654	C	0.265	0.174	0.001875	JHU_X.178482	chrX	178482	0	378482	2009
7	GSA-rs196617	0.001397	0.002051	0.9654	C	0.4338	0.5522	0.0006967	rs196617	chr7	36300383	36100383	36500383	2013
22	GSA-rs739281	0.001398	0.002052	0.9654	C	0.2308	0.3159	0.005936	rs739281	chr22	25881180	25681180	26081180	2013
7	rs4546608	0.001398	0.002052	0.9654	A	0.1517	0.07967	0.001525	rs4546608	chr7	49599175	49399175	49799175	2013
12	GSA-rs55709943	0.0014	0.002054	0.9654	G	0.1688	0.2418	0.009153	rs55709943	chr12	48394744	48194744	48594744	2013
9	GSA-rs67380957	0.001402	0.002057	0.9654	C	0.1111	0.1841	0.002866	rs67380957	chr9	79235896	79035896	79435896	2013
18	rs8091894	0.001405	0.002062	0.9654	G	0.08974	0.1731	0.0003297	rs8091894	chr18	63473976	63273976	63673976	2013
5	rs331391	0.001405	0.002062	0.9654	T	0.1923	0.2735	0.005684	rs331391	chr5	91713849	91513849	91913849	2013
2	rs2290482	0.001406	0.002062	0.9654	A	0.01073	0.04396	0.002489	rs2290482	chr2	134452563	134252563	134652563	2013
13	rs12864704	0.001407	0.002064	0.9654	C	0	0.02198	0.001301	rs12864704	chr13	83511802	83311802	83711802	2013
1	rs11568032	0.001407	0.002065	0.9654	T	0.01068	0.04121	0.004349	rs11568032	chr1	230710558	230510558	230910558	2013
2	rs10169899	0.001412	0.002071	0.9654	G	0.2735	0.3702	0.002966	rs10169899	chr2	3455970	3255970	3655970	2013
2	GSA-rs112703627	0.001415	0.002075	0.9654	T	0.03632	0.002747	0.0009585	rs112703627	chr2	233096229	232896229	233296229	2013
3	rs9834806	0.001427	0.002092	0.9654	A	0.1752	0.261	0.002708	rs9834806	chr3	161175184	160975184	161375184	2013
11	rs319027	0.001429	0.002095	0.9654	T	0.2393	0.1456	0.000771	rs319027	chr11	89515841	89315841	89715841	2013
15	GSA-rs79650856	0.001434	0.002102	0.9654	T	0.1538	0.2459	0.0008858	rs79650856	chr15	40815356	40615356	41015356	2013
20	GSA-rs6017379	0.001434	0.002102	0.9654	C	0.1346	0.206	0.005999	rs6017379	chr20	44654740	44454740	44854740	2013
10	GSA-rs1977684	0.001434	0.002102	0.9654	T	0.1987	0.2857	0.003408	rs1977684	chr10	59479715	59279715	59679715	2013
3	GSA-rs2922194	0.001438	0.002107	0.9654	A	0.1816	0.272	0.001838	rs2922194	chr3	125613418	125413418	125813418	2013
23	rs5932588	0.001439	0.002109	0.9654	A	0.1261	0.206	0.00185	rs5932588	chrX	129195922	128995922	129395922	2013
4	GSA-rs11947157	0.00144	0.002109	0.9654	C	0.319	0.4176	0.003387	rs11947157	chr4	116874221	116674221	117074221	2013
6	1kg_6_30154757	0.00144	0.00211	0.9654	G	0.06197	0.02198	0.005508	1kg_6_30154757	chr6	30078901	29878901	30278901	2013
2	GSA-rs7577008	0.001441	0.002111	0.9654	C	0.4359	0.3398	0.004948	rs7577008	chr2	227364900	227164900	227564900	2013
12	rs1865159	0.001445	0.002117	0.9654	A	0.3162	0.4258	0.001119	rs1865159	chr12	20918324	20718324	21118324	2013
10	rs7075383	0.001448	0.002121	0.9654	T	0.3556	0.2652	0.005551	rs7075383	chr10	129783831	129583831	129983831	2013
1	GSA-rs72646364	0.001457	0.002133	0.9654	T	0.04487	0.008242	0.001739	rs72646364	chr1	13483643	13283643	13683643	2013
6	rs260255	0.001457	0.002133	0.9654	C	0.141	0.08011	0.006264	rs260255	chr6	42433343	42233343	42633343	2013
2	rs62151333	0.001457	0.002133	0.9654	A	0.1368	0.07143	0.002618	rs62151333	chr2	81436519	81236519	81636519	2013
1	GSA-rs77056073	0.00146	0.002138	0.9654	G	0.03419	0.08242	0.002531	rs77056073	chr1	10063336	9863336	10263336	2013
5	rs12651724	0.00146	0.002137	0.9654	T	0.08333	0.1401	0.008906	rs12651724	chr5	108038982	107838982	108238982	2013
3	GSA-rs7632937	0.001461	0.002138	0.9654	T	0.4124	0.5247	0.001263	rs7632937	chr3	14127578	13927578	14327578	2013
3	rs79698924	0.001461	0.002139	0.9654	T	0.01709	0.04945	0.007791	rs79698924	chr3	29214315	29014315	29414315	2013
9	GSA-rs817846	0.001461	0.002138	0.9654	C	0.0235	0.06319	0.004129	rs817846	chr9	107340695	107140695	107540695	2013
4	rs6841056	0.001461	0.002139	0.9654	T	0.06624	0.1401	0.0003908	rs6841056	chr4	188130981	187930981	188330981	2013
6	rs17189190	0.001469	0.002149	0.9654	G	0.01923	0.0663	0.0005784	rs17189190	chr6	30621636	30421636	30821636	2013
6	GSA-rs72953080	0.001472	0.002153	0.9654	T	0.0812	0.1374	0.008968	rs72953080	chr6	119079119	118879119	119279119	2013
4	rs4455437	0.001472	0.002154	0.9654	G	0.1966	0.1222	0.004198	rs4455437	chr4	121215607	121015607	121415607	2013
9	GSA-rs10961779	0.001476	0.002159	0.9654	T	0.4038	0.5055	0.003448	rs10961779	chr9	14897148	14697148	15097148	2013
10	GSA-rs115229306	0.001478	0.002161	0.9654	T	0.01068	0.04945	0.0007159	rs115229306	chr10	66865189	66665189	67065189	2013
13	rs79962253	0.001482	0.002167	0.9654	C	0.0641	0.1319	0.0008789	rs79962253	chr13	96444099	96244099	96644099	2013
14	rs57672161	0.001482	0.002167	0.9654	T	0.04915	0.1071	0.001577	rs57672161	chr14	101222110	101022110	101422110	2013
2	rs10207028	0.001485	0.002171	0.9654	C	0.2158	0.3022	0.004495	rs10207028	chr2	122203833	122003833	122403833	2013
13	GSA-rs12583207	0.001486	0.002173	0.9654	A	0.01709	0.05769	0.001539	rs12583207	chr13	40796020	40596020	40996020	2013
23	rs1554914	0.001486	0.002173	0.9654	G	0.2286	0.1374	0.0008444	rs1554914	chrX	151710184	151510184	151910184	2013
5	GSA-rs1799575	0.001491	0.00218	0.9654	A	0.3632	0.2637	0.002264	rs1799575	chr5	166355320	166155320	166555320	2013
12	ilmnseq_rs2306283_ilmndup1	0.001492	0.002181	0.9654	A	0.1517	0.2445	0.000754	rs2306283	chr12	21176803	20976803	21376803	2009
12	rs2306283	0.001492	0.002181	0.9654	A	0.1517	0.2445	0.000754	rs2306283	chr12	21176803	20976803	21376803	2013
15	rs12913328	0.001493	0.002182	0.9654	A	0.203	0.2983	0.001528	rs12913328	chr15	24571991	24371991	24771991	2013
13	rs7322914	0.001496	0.002186	0.9654	T	0.3355	0.4558	0.0004186	rs7322914	chr13	106488561	106288561	106688561	2013
2	rs10200750	0.001496	0.002186	0.9654	G	0.297	0.3984	0.002226	rs10200750	chr2	138183205	137983205	138383205	2013
18	rs1945476	0.001497	0.002188	0.9654	G	0.1774	0.2802	0.0004004	rs1945476	chr18	61747014	61547014	61947014	2013
23	rs7876198	0.001499	0.00219	0.9654	G	0.2949	0.1923	0.0007008	rs7876198	chrX	98406824	98206824	98606824	2013
14	GSA-rs17197550	0.00151	0.002205	0.9654	T	0.2927	0.4121	0.0003272	rs17197550	chr14	21888044	21688044	22088044	2013
6	rs9355058	0.00151	0.002205	0.9654	T	0.406	0.511	0.002536	rs9355058	chr6	168254297	168054297	168454297	2013
8	rs28727938	0.001511	0.002207	0.9654	G	0.2286	0.1374	0.0008444	rs28727938	chr8	76566303	76366303	76766303	2013
1	rs76346105	0.001517	0.002215	0.9654	G	0.09829	0.03571	0.0004859	rs76346105	chr1	244292199	244092199	244492199	2013
3	GSA-rs62280642	0.001519	0.002218	0.9654	T	0.1197	0.1951	0.002702	rs62280642	chr3	133858906	133658906	134058906	2013
4	rs56077865	0.001519	0.002218	0.9654	G	0.1538	0.09066	0.006475	rs56077865	chr4	168574650	168374650	168774650	2013
13	GSA-rs2993305	0.00152	0.002219	0.9654	C	0.3397	0.2473	0.003852	rs2993305	chr13	113024515	112824515	113224515	2013
23	rs62601609	0.001522	0.002222	0.9654	A	0.0641	0.1291	0.001326	rs62601609	chrX	146143074	145943074	146343074	2013
6	rs4709517	0.001528	0.00223	0.9654	C	0.4316	0.5385	0.002211	rs4709517	chr6	161418748	161218748	161618748	2013
2	rs971742	0.001531	0.002235	0.9654	T	0.3734	0.489	0.0008243	rs971742	chr2	60573505	60373505	60773505	2013
16	rs3865198	0.001535	0.002239	0.9654	C	0.1132	0.1923	0.001436	rs3865198	chr16	10324913	10124913	10524913	2013
4	GSA-rs76993069	0.001541	0.002247	0.9654	T	0.01282	0.04121	0.009605	rs76993069	chr4	101525012	101325012	101725012	2013
1	rs79433405	0.001544	0.002252	0.9654	A	0.08974	0.1538	0.004435	rs79433405	chr1	93027512	92827512	93227512	2013
8	rs2517237	0.001545	0.002253	0.9654	G	0.203	0.2912	0.003188	rs2517237	chr8	17518449	17318449	17718449	2013
3	GSA-rs74976158	0.001548	0.002258	0.9654	T	0.09402	0.1713	0.0009436	rs74976158	chr3	74866778	74666778	75066778	2013
10	rs3814219	0.001549	0.002258	0.9654	A	0.265	0.1758	0.002291	rs3814219	chr10	103887336	103687336	104087336	2013
5	rs4382150	0.001549	0.002259	0.9654	G	0.3697	0.272	0.002886	rs4382150	chr5	106972306	106772306	107172306	2013
3	rs2169643	0.001549	0.002258	0.9654	A	0.4295	0.5467	0.0007879	rs2169643	chr3	111171126	110971126	111371126	2013
4	rs73229203	0.00155	0.00226	0.9654	T	0.1517	0.08516	0.003693	rs73229203	chr4	32277822	32077822	32477822	2013
17	GSA-rs2716191	0.001555	0.002267	0.9654	T	0.5214	0.4203	0.003797	rs2716191	chr17	69540180	69340180	69740180	2013
7	rs34281859	0.001556	0.002269	0.9654	G	0.05983	0.1209	0.00189	rs34281859	chr7	153154462	152954462	153354462	2013
5	GSA-rs6595073	0.001557	0.00227	0.9654	A	0.1502	0.08242	0.002907	rs6595073	chr5	117925626	117725626	118125626	2013
1	rs1923140	0.001559	0.002272	0.9654	A	0.4295	0.3214	0.001463	rs1923140	chr1	33872102	33672102	34072102	2013
15	rs4238330	0.00156	0.002274	0.9654	T	0.438	0.544	0.002423	rs4238330	chr15	58531216	58331216	58731216	2013
1	rs4649801	0.001561	0.002275	0.9654	G	0.03205	0.09066	0.0003222	rs4649801	chr1	120144551	119944551	120344551	2013
2	rs7558779	0.001565	0.00228	0.9654	G	0.3996	0.3022	0.003635	rs7558779	chr2	12635663	12435663	12835663	2013
1	GSA-rs12751442	0.001567	0.002283	0.9654	T	0.2436	0.3434	0.001596	rs12751442	chr1	89352880	89152880	89552880	2013
2	rs1377407	0.001572	0.00229	0.9654	T	0.235	0.3159	0.009164	rs1377407	chr2	117299194	117099194	117499194	2013
8	rs62522080	0.001574	0.002293	0.9654	A	0.06197	0.1181	0.004257	rs62522080	chr8	139514375	139314375	139714375	2013
9	GSA-rs10965583	0.001576	0.002295	0.9654	T	0.5128	0.4171	0.006164	rs10965583	chr9	23062503	22862503	23262503	2013
13	rs12583161	0.001577	0.002297	0.9654	A	0.1047	0.1796	0.00189	rs12583161	chr13	95629441	95429441	95829441	2013
6	GSA-rs11153336	0.001577	0.002297	0.9654	A	0.2137	0.1346	0.003173	rs11153336	chr6	112091974	111891974	112291974	2013
23	rs5924768	0.00158	0.002302	0.9654	A	0.3098	0.2222	0.004967	rs5924768	chrX	152880007	152680007	153080007	2013
13	GSA-rs17187336	0.001585	0.002308	0.9654	T	0.04274	0.008242	0.002609	rs17187336	chr13	60383083	60183083	60583083	2013
16	GSA-rs11646387	0.00159	0.002315	0.9654	T	0.09227	0.1657	0.001485	rs11646387	chr16	10308902	10108902	10508902	2013
14	rs12586452	0.00159	0.002315	0.9654	A	0.4038	0.3077	0.004192	rs12586452	chr14	53739452	53539452	53939452	2013
5	rs2963945	0.001592	0.002318	0.9654	T	0.04741	0.0989	0.003962	rs2963945	chr5	153654514	153454514	153854514	2013
14	rs1780864	0.001597	0.002324	0.9654	T	0.2308	0.1484	0.002899	rs1780864	chr14	98228246	98028246	98428246	2013
6	GSA-rs114773041	0.0016	0.002329	0.9654	T	0.03632	0.07692	0.01022	rs114773041	chr6	119030554	118830554	119230554	2013
2	rs10497198	0.0016	0.002328	0.9654	A	0.03205	0.005495	0.007231	rs10497198	chr2	158257881	158057881	158457881	2013
4	rs715213	0.001601	0.00233	0.9654	T	0.1154	0.1896	0.002787	rs715213	chr4	20266291	20066291	20466291	2013
12	rs11060780	0.001601	0.002329	0.9654	A	0.3718	0.2665	0.001302	rs11060780	chr12	130217253	130017253	130417253	2013
5	rs4705160	0.001602	0.002331	0.9654	C	0.1923	0.1105	0.0013	rs4705160	chr5	147309864	147109864	147509864	2013
11	rs1873059	0.001605	0.002336	0.9654	G	0.4103	0.3077	0.002306	rs1873059	chr11	45519052	45319052	45719052	2013
6	rs17195446	0.001606	0.002337	0.9654	G	0.02137	0.06868	0.0007447	rs17195446	chr6	30586075	30386075	30786075	2013
6	rs13195066	0.001606	0.002337	0.9654	G	0.02137	0.06868	0.0007447	rs13195066	chr6	30593018	30393018	30793018	2013
2	rs4894101	0.001608	0.002339	0.9654	C	0.1185	0.1994	0.001452	rs4894101	chr2	179484396	179284396	179684396	2013
18	GSA-rs72989849	0.001617	0.002351	0.9654	T	0.04915	0.09066	0.01775	rs72989849	chr18	78221553	78021553	78421553	2013
6	GSA-rs725841	0.001619	0.002354	0.9654	T	0.3825	0.2885	0.004551	rs725841	chr6	39584621	39384621	39784621	2013
3	rs1453733	0.001621	0.002356	0.9654	G	0.4744	0.3681	0.002125	rs1453733	chr3	83613796	83413796	83813796	2013
13	GSA-rs1038739	0.001622	0.002358	0.9654	G	0.1496	0.2225	0.006759	rs1038739	chr13	85274262	85074262	85474262	2013
7	GSA-rs7793467	0.001629	0.002368	0.9654	C	0.3578	0.25	0.0009529	rs7793467	chr7	11782984	11582984	11982984	2013
8	rs12548668	0.001629	0.002368	0.9654	T	0.1474	0.06593	0.0002146	rs12548668	chr8	41120169	40920169	41320169	2013
18	rs7229969	0.001629	0.002368	0.9654	G	0.2094	0.2967	0.003801	rs7229969	chr18	45683107	45483107	45883107	2013
10	GSA-rs286493	0.001629	0.002368	0.9654	T	0.2265	0.1401	0.001582	rs286493	chr10	88261493	88061493	88461493	2013
15	GSA-rs76010310	0.001631	0.002371	0.9654	T	0.1538	0.2445	0.001024	rs76010310	chr15	40807620	40607620	41007620	2013
3	rs11710077	0.001633	0.002374	0.9654	T	0.09188	0.03571	0.001338	rs11710077	chr3	38616407	38416407	38816407	2013
13	rs10467236	0.001647	0.002392	0.9654	A	0.4444	0.3352	0.001391	rs10467236	chr13	88588551	88388551	88788551	2013
1	GSA-rs16829575	0.001647	0.002392	0.9654	C	0.02137	0.07143	0.0004304	rs16829575	chr1	194163905	193963905	194363905	2013
2	rs62185756	0.001651	0.002397	0.9654	T	0.2137	0.3104	0.001511	rs62185756	chr2	220824236	220624236	221024236	2013
19	rs4805763	0.001654	0.002402	0.9654	T	0.04077	0.09341	0.002087	rs4805763	chr19	32510541	32310541	32710541	2013
1	GSA-rs61839743	0.001656	0.002405	0.9654	C	0.08761	0.1456	0.008754	rs61839743	chr1	242710142	242510142	242910142	2013
6	rs9367207	0.001659	0.002409	0.9654	G	0.235	0.1566	0.00507	rs9367207	chr6	44706876	44506876	44906876	2013
14	rs17733808	0.001661	0.002412	0.9654	G	0.05983	0.1133	0.005693	rs17733808	chr14	61289049	61089049	61489049	2013
18	rs8092689	0.001663	0.002413	0.9654	A	0.1944	0.2735	0.007195	rs8092689	chr18	67731176	67531176	67931176	2013
10	GSA-rs79961501	0.001666	0.002418	0.9654	T	0.02564	0.07418	0.001018	rs79961501	chr10	44238034	44038034	44438034	2013
5	rs7706525	0.001667	0.00242	0.9654	C	0.4338	0.5495	0.0009248	rs7706525	chr5	151111189	150911189	151311189	2013
1	rs12032218	0.001669	0.002423	0.9654	T	0.2607	0.1648	0.0009078	rs12032218	chr1	237032805	236832805	237232805	2013
6	rs2074483	0.00167	0.002423	0.9654	A	0.1688	0.275	0.0002265	rs2074483	chr6	30108977	29908977	30308977	2013
10	rs2797988	0.001672	0.002426	0.9654	T	0.3932	0.5055	0.001228	rs2797988	chr10	94142253	93942253	94342253	2013
4	rs2280120	0.001673	0.002427	0.9654	A	0.2457	0.3536	0.0007075	rs2280120	chr4	53549501	53349501	53749501	2013
16	rs142001681	0.001677	0.002433	0.9654	G	0	0.01923	0.002589	rs142001681	chr16	29847960	29647960	30047960	2013
12	GSA-rs17108992	0.001678	0.002435	0.9654	G	0.2393	0.1547	0.002622	rs17108992	chr12	70888341	70688341	71088341	2013
9	GSA-rs4130866	0.001678	0.002434	0.9654	C	0.05128	0.1071	0.002516	rs4130866	chr9	72243201	72043201	72443201	2013
8	rs16895201	0.001678	0.002435	0.9654	C	0.1538	0.09066	0.006475	rs16895201	chr8	121365573	121165573	121565573	2013
7	rs7790504	0.001679	0.002436	0.9654	C	0.3184	0.4258	0.001409	rs7790504	chr7	14590174	14390174	14790174	2013
7	rs60088553	0.001679	0.002435	0.9654	C	0.06197	0.1154	0.00622	rs60088553	chr7	68612968	68412968	68812968	2013
14	GSA-rs1243678	0.001681	0.002438	0.9654	G	0.2897	0.1927	0.001391	rs1243678	chr14	20625542	20425542	20825542	2013
11	GSA-rs11213957	0.001681	0.002438	0.9654	T	0.04915	0.01374	0.004961	rs11213957	chr11	111623015	111423015	111823015	2013
3	GSA-rs35875481	0.001681	0.002439	0.9654	T	0.1987	0.1181	0.001819	rs35875481	chr3	139805919	139605919	140005919	2013
5	rs13190543	0.001685	0.002444	0.9654	C	0.3504	0.2473	0.001347	rs13190543	chr5	160785582	160585582	160985582	2013
1	exm2265073	0.001685	0.002443	0.9654	G	0.5	0.3867	0.001145	exm2265073	chr1	201188328	200988328	201388328	2013
10	rs1536389	0.001688	0.002448	0.9654	G	0.1667	0.2582	0.001213	rs1536389	chr10	120504687	120304687	120704687	2013
17	GSA-rs116169465	0.001692	0.002453	0.9654	C	0.2393	0.1538	0.002315	rs116169465	chr17	35553997	35353997	35753997	2013
7	rs10216184	0.001695	0.002458	0.9654	G	0.3077	0.2143	0.002512	rs10216184	chr7	80633513	80433513	80833513	2013
4	rs2376983	0.0017	0.002465	0.9654	T	0.406	0.5055	0.004204	rs2376983	chr4	188920223	188720223	189120223	2013
17	rs9895544	0.001705	0.002472	0.9654	A	0.1944	0.1154	0.002022	rs9895544	chr17	67655027	67455027	67855027	2013
4	rs983390	0.001707	0.002473	0.9654	G	0.1944	0.1099	0.0008943	rs983390	chr4	55791572	55591572	55991572	2013
1	GSA-rs16844019	0.001707	0.002473	0.9654	A	0.141	0.2225	0.00223	rs16844019	chr1	165396915	165196915	165596915	2013
4	rs9998104	0.001709	0.002477	0.9654	A	0.3739	0.4863	0.00114	rs9998104	chr4	155249206	155049206	155449206	2013
12	ilmnseq_rs2306283_ilmndup3	0.00171	0.002478	0.9654	A	0.1524	0.2445	0.0008399	rs2306283	chr12	21176803	20976803	21376803	2009
7	GSA-rs1406523	0.001714	0.002483	0.9654	T	0.2585	0.1676	0.001641	rs1406523	chr7	151985325	151785325	152185325	2013
7	GSA-rs139981521	0.001716	0.002485	0.9654	T	0.004274	0.03297	0.001412	rs139981521	chr7	480117	280117	680117	2013
7	rs12706964	0.001728	0.002502	0.9654	G	0.08333	0.03846	0.008562	rs12706964	chr7	131155393	130955393	131355393	2013
17	GSA-rs321612	0.001729	0.002503	0.9654	T	0.3718	0.2747	0.003122	rs321612	chr17	35554611	35354611	35754611	2013
9	GSA-rs1805334	0.001729	0.002504	0.9654	G	0.02137	0.05495	0.009962	rs1805334	chr9	107323867	107123867	107523867	2013
9	GSA-rs73513184	0.001731	0.002506	0.9654	G	0.09402	0.03297	0.0004893	rs73513184	chr9	107620830	107420830	107820830	2013
5	rs12110273	0.001734	0.00251	0.9654	T	0.3974	0.2967	0.002567	rs12110273	chr5	4288431	4088431	4488431	2013
13	GSA-rs1107168	0.001739	0.002517	0.9654	A	0.07051	0.1319	0.003061	rs1107168	chr13	27771814	27571814	27971814	2013
1	rs11586865	0.001739	0.002517	0.9654	A	0.08547	0.02747	0.0004797	rs11586865	chr1	29486755	29286755	29686755	2013
23	rs145964372	0.001744	0.002524	0.9654	A	0.05556	0.01374	0.001581	rs145964372	chrX	3789816	3589816	3989816	2013
12	GSA-rs117461582	0.001744	0.002523	0.9654	A	0	0.01923	0.002589	rs117461582	chr12	87694687	87494687	87894687	2013
11	GSA-rs117761182	0.001744	0.002524	0.9654	T	0.02137	0.06044	0.003646	rs117761182	chr11	131398538	131198538	131598538	2013
5	rs13165516	0.001748	0.002529	0.9654	G	0.3406	0.442	0.003057	rs13165516	chr5	73281187	73081187	73481187	2013
8	rs7844593	0.00175	0.002532	0.9654	A	0.4979	0.4011	0.005432	rs7844593	chr8	15121972	14921972	15321972	2013
16	rs12922855	0.001751	0.002533	0.9654	C	0.05983	0.1264	0.0008228	rs12922855	chr16	6134388	5934388	6334388	2013
23	rs6568194	0.001752	0.002534	0.9654	C	0.2876	0.4011	0.0005966	rs6568194	chrX	113643709	113443709	113843709	2013
16	rs2648005	0.001754	0.002538	0.9654	G	0.02564	0.06868	0.002812	rs2648005	chr16	51533128	51333128	51733128	2013
5	rs58307385	0.001756	0.00254	0.9654	T	0.1966	0.1126	0.001047	rs58307385	chr5	44330754	44130754	44530754	2013
2	GSA-rs62161137	0.001758	0.002543	0.9654	T	0.2991	0.3984	0.002778	rs62161137	chr2	138188164	137988164	138388164	2013
14	rs1958333	0.001759	0.002544	0.9654	A	0.3205	0.4199	0.003167	rs1958333	chr14	47889089	47689089	48089089	2013
5	rs1353630	0.00176	0.002545	0.9654	C	0.188	0.1071	0.001289	rs1353630	chr5	2757825	2557825	2957825	2013
8	rs16880226	0.001761	0.002547	0.9654	C	0.453	0.3654	0.01094	rs16880226	chr8	88246017	88046017	88446017	2013
19	rs77368006	0.001762	0.002548	0.9654	T	0.0235	0	0.003235	rs77368006	chr19	9807678	9607678	10007678	2013
10	rs7894921	0.001763	0.00255	0.9654	C	0.2753	0.1796	0.0013	rs7894921	chr10	30542009	30342009	30742009	2013
18	rs1052695	0.001763	0.00255	0.9654	A	0.5193	0.4176	0.003587	rs1052695	chr18	49036414	48836414	49236414	2013
1	rs114476062	0.001765	0.002553	0.9654	T	0.04274	0.005495	0.0008963	rs114476062	chr1	225497779	225297779	225697779	2013
7	GSA-rs10229847	0.001769	0.002558	0.9654	C	0.2621	0.3701	0.00099	rs10229847	chr7	42535526	42335526	42735526	2013
2	GSA-rs7576009	0.001771	0.002561	0.9654	A	0.2137	0.294	0.00788	rs7576009	chr2	30365943	30165943	30565943	2013
9	GSA-rs2416604	0.001772	0.002561	0.9654	C	0.1624	0.25	0.00175	rs2416604	chr9	118033711	117833711	118233711	2013
5	rs11749275	0.001773	0.002562	0.9654	G	0.4188	0.3104	0.001331	rs11749275	chr5	31912320	31712320	32112320	2013
14	GSA-rs7493026	0.001775	0.002565	0.9654	A	0.09615	0.1676	0.002174	rs7493026	chr14	100968917	100768917	101168917	2013
10	rs1927450	0.001776	0.002567	0.9654	T	0.04487	0.09615	0.003404	rs1927450	chr10	29785870	29585870	29985870	2013
11	rs11223579	0.001782	0.002575	0.9654	T	0.2201	0.1346	0.001551	rs11223579	chr11	133749009	133549009	133949009	2013
21	rs2838408	0.001784	0.002578	0.9654	G	0.2201	0.3159	0.001815	rs2838408	chr21	43826540	43626540	44026540	2013
16	rs35207980	0.001786	0.00258	0.9654	A	0.1068	0.1786	0.002939	rs35207980	chr16	85238079	85038079	85438079	2013
23	rs1986959	0.001787	0.002581	0.9654	T	0.1987	0.2967	0.001055	rs1986959	chrX	3717497	3517497	3917497	2013
10	rs10823505	0.001787	0.002582	0.9654	G	0.4081	0.4945	0.01289	rs10823505	chr10	70275299	70075299	70475299	2013
13	rs34229436	0.001789	0.002584	0.9654	A	0.1068	0.1896	0.0007223	rs34229436	chr13	34531461	34331461	34731461	2013
3	rs7633943	0.001789	0.002584	0.9654	T	0.2115	0.1346	0.003999	rs7633943	chr3	145599147	145399147	145799147	2013
4	rs9985504	0.001791	0.002587	0.9654	T	0.4444	0.337	0.001712	rs9985504	chr4	81680902	81480902	81880902	2013
10	rs1014637	0.001793	0.00259	0.9654	T	0.3162	0.228	0.004822	rs1014637	chr10	130731568	130531568	130931568	2013
23	rs5963085	0.001795	0.002593	0.9654	A	0.2073	0.3022	0.001677	rs5963085	chrX	38833251	38633251	39033251	2013
6	GSA-rs76762318	0.001796	0.002594	0.9654	T	0.02778	0.07143	0.003127	rs76762318	chr6	99256568	99056568	99456568	2013
5	GSA-rs114833053	0.001796	0.002595	0.9654	T	0.002137	0.03571	0.0001874	rs114833053	chr5	154222581	154022581	154422581	2013
6	GSA-rs9458504	0.001797	0.002596	0.9654	A	0.3269	0.4258	0.00338	rs9458504	chr6	162304160	162104160	162504160	2013
7	rs6961992	0.001798	0.002597	0.9654	A	0.3953	0.5302	0.0001056	rs6961992	chr7	135771343	135571343	135971343	2013
2	rs16828791	0.001798	0.002597	0.9654	T	0.05556	0.1016	0.01266	rs16828791	chr2	148539317	148339317	148739317	2013
9	GSA-rs12551356	0.001806	0.002607	0.9654	T	0.1856	0.2845	0.0009222	rs12551356	chr9	74698279	74498279	74898279	2013
16	rs7403856	0.001813	0.002618	0.9654	A	0.2436	0.1621	0.004057	rs7403856	chr16	6106324	5906324	6306324	2013
6	rs6915205	0.001818	0.002624	0.9654	T	0.1239	0.06044	0.002058	rs6915205	chr6	30040265	29840265	30240265	2013
5	rs1961191	0.00182	0.002627	0.9654	G	0.4765	0.3764	0.003832	rs1961191	chr5	119005429	118805429	119205429	2013
9	GSA-rs672801	0.001821	0.002629	0.9654	A	0.1368	0.07692	0.006336	rs672801	chr9	71059439	70859439	71259439	2013
17	rs1515754	0.001824	0.002633	0.9654	T	0.02564	0.07692	0.0006033	rs1515754	chr17	47190262	46990262	47390262	2013
5	rs7705778	0.001825	0.002633	0.9654	T	0.2094	0.1319	0.003538	rs7705778	chr5	26348270	26148270	26548270	2013
3	rs965170	0.001826	0.002635	0.9654	T	0.1496	0.2308	0.002776	rs965170	chr3	7172875	6972875	7372875	2013
9	GSA-rs4376557	0.001826	0.002634	0.9654	A	0.1795	0.1126	0.007425	rs4376557	chr9	75145626	74945626	75345626	2013
5	rs7701305	0.001827	0.002635	0.9654	A	0.3803	0.2885	0.005518	rs7701305	chr5	118362783	118162783	118562783	2013
23	rs1921693	0.001832	0.002643	0.9654	G	0.1838	0.1154	0.006693	rs1921693	chrX	8259804	8059804	8459804	2013
1	rs849942	0.001834	0.002646	0.9654	T	0.25	0.1731	0.00761	rs849942	chr1	37068711	36868711	37268711	2013
2	GSA-rs76925199	0.001835	0.002647	0.9654	A	0.04274	0.0989	0.001338	rs76925199	chr2	137003937	136803937	137203937	2013
17	rs28908	0.001839	0.002652	0.9654	A	0.2821	0.3846	0.001756	rs28908	chr17	32992409	32792409	33192409	2013
11	rs7106084	0.001843	0.002657	0.9654	T	0.2778	0.1923	0.004209	rs7106084	chr11	96982097	96782097	97182097	2013
13	rs2734	0.001844	0.002659	0.9654	T	0.1432	0.2182	0.004848	rs2734	chr13	51793070	51593070	51993070	2013
9	GSA-rs7030169	0.001844	0.002659	0.9654	C	0.02146	0.05495	0.01033	rs7030169	chr9	107291786	107091786	107491786	2013
8	rs10105040	0.001845	0.002661	0.9654	G	0.2137	0.3187	0.00061	rs10105040	chr8	93698864	93498864	93898864	2013
18	rs17074052	0.001852	0.002669	0.9654	C	0.06197	0.0221	0.005783	rs17074052	chr18	65009305	64809305	65209305	2013
3	rs6767568	0.001858	0.002678	0.9654	A	0.1132	0.04945	0.001085	rs6767568	chr3	153777312	153577312	153977312	2013
5	rs17069574	0.001859	0.002679	0.9654	A	0.1111	0.0467	0.0008322	rs17069574	chr5	168008968	167808968	168208968	2013
13	rs9546178	0.001863	0.002685	0.9654	G	0.5128	0.4171	0.006164	rs9546178	chr13	82589781	82389781	82789781	2013
10	GSA-rs114080429	0.001869	0.002693	0.9654	C	0.03632	0.005495	0.003145	rs114080429	chr10	94051758	93851758	94251758	2013
2	rs72780049	0.001872	0.002697	0.9654	G	0.07051	0.1291	0.004445	rs72780049	chr2	19305552	19105552	19505552	2013
17	rs12600549	0.001872	0.002697	0.9654	T	0.25	0.3407	0.004238	rs12600549	chr17	43699317	43499317	43899317	2013
5	rs1345823	0.001875	0.0027	0.9654	C	0.4827	0.3709	0.001285	rs1345823	chr5	50511347	50311347	50711347	2013
6	rs3778172	0.001877	0.002703	0.9654	C	0.1132	0.1841	0.003922	rs3778172	chr6	88639718	88439718	88839718	2013
3	rs6437378	0.001877	0.002704	0.9654	C	0.2863	0.384	0.002982	rs6437378	chr3	194346505	194146505	194546505	2013
16	rs1677306	0.001883	0.002711	0.9654	T	0.265	0.3619	0.002687	rs1677306	chr16	77999291	77799291	78199291	2013
9	GSA-rs4144233	0.001884	0.002713	0.9654	G	0.3932	0.5	0.002071	rs4144233	chr9	126651889	126451889	126851889	2013
6	GSA-rs6928280	0.001888	0.002719	0.9654	G	0.07328	0.1389	0.002018	rs6928280	chr6	29639300	29439300	29839300	2013
9	GSA-rs16915452	0.001894	0.002726	0.9654	T	0.1239	0.1923	0.006693	rs16915452	chr9	29959701	29759701	30159701	2013
4	GSA-rs74916737	0.001896	0.002729	0.9654	G	0.01068	0.0442	0.002295	rs74916737	chr4	95561531	95361531	95761531	2013
2	rs1921819	0.001896	0.002729	0.9654	C	0.5279	0.4116	0.0008893	rs1921819	chr2	123991986	123791986	124191986	2013
5	rs75985777	0.001904	0.00274	0.9654	G	0.09188	0.1621	0.002191	rs75985777	chr5	127973293	127773293	128173293	2013
16	rs215066	0.001906	0.002743	0.9654	A	0.2756	0.1868	0.00279	rs215066	chr16	15985259	15785259	16185259	2013
7	GSA-rs59274457	0.001908	0.002745	0.9654	T	0.2778	0.3736	0.003273	rs59274457	chr7	155261392	155061392	155461392	2013
23	rs5959408	0.00191	0.002748	0.9654	G	0.1346	0.2225	0.0008838	rs5959408	chrX	79658773	79458773	79858773	2013
7	rs327708	0.001913	0.002752	0.9654	A	0.2692	0.1786	0.002038	rs327708	chr7	81202184	81002184	81402184	2013
7	rs10280101	0.001915	0.002755	0.9654	C	0.2329	0.1484	0.002301	rs10280101	chr7	87524268	87324268	87724268	2013
4	rs1385513	0.001915	0.002754	0.9654	C	0.3697	0.2665	0.001615	rs1385513	chr4	167229442	167029442	167429442	2013
5	GSA-rs4391137	0.001918	0.002758	0.9654	C	0.4103	0.3049	0.001739	rs4391137	chr5	4776943	4576943	4976943	2013
23	rs1503783	0.001918	0.002758	0.9654	T	0.359	0.2692	0.005896	rs1503783	chrX	51354525	51154525	51554525	2013
13	GSA-rs10161995	0.00192	0.002762	0.9654	T	0.04741	0.1126	0.0004424	rs10161995	chr13	19864794	19664794	20064794	2013
5	rs6868206	0.001923	0.002766	0.9654	G	0.08333	0.1538	0.001511	rs6868206	chr5	23604933	23404933	23804933	2013
6	rs1265311	0.00193	0.002774	0.9654	G	0.1368	0.221	0.001481	rs1265311	chr6	161284481	161084481	161484481	2013
5	rs74885130	0.001932	0.002778	0.9654	A	0.01709	0.05769	0.001539	rs74885130	chr5	66855413	66655413	67055413	2013
23	exm2268572	0.001933	0.002778	0.9654	A	0.1816	0.2762	0.001162	exm2268572	chrX	19229652	19029652	19429652	2013
23	rs5943546	0.001934	0.00278	0.9654	A	0.359	0.261	0.002565	rs5943546	chrX	28775263	28575263	28975263	2013
9	GSA-rs1923431	0.001936	0.002783	0.9654	C	0.07051	0.02198	0.001334	rs1923431	chr9	38360335	38160335	38560335	2013
7	rs77362779	0.00194	0.002788	0.9654	G	0.07265	0.03297	0.01297	rs77362779	chr7	22361182	22161182	22561182	2013
8	rs4391396	0.001944	0.002793	0.9654	A	0.2991	0.4011	0.002129	rs4391396	chr8	93983516	93783516	94183516	2013
3	rs5005702	0.001947	0.002798	0.9654	G	0.2778	0.3736	0.003273	rs5005702	chr3	68536614	68336614	68736614	2013
23	rs2819657	0.001947	0.002798	0.9654	C	0.3376	0.4478	0.001199	rs2819657	chrX	117243412	117043412	117443412	2013
6	rs16873629	0.001952	0.002805	0.9654	T	0.04487	0.01374	0.01045	rs16873629	chr6	45657872	45457872	45857872	2013
20	rs6014232	0.001952	0.002804	0.9654	A	0.1667	0.25	0.003038	rs6014232	chr20	54959678	54759678	55159678	2013
9	rs4740619	0.001955	0.002809	0.9654	C	0.3632	0.4779	0.0008794	rs4740619	chr9	15634327	15434327	15834327	2013
1	rs12117299	0.001957	0.002811	0.9654	G	0.1132	0.1841	0.003922	rs12117299	chr1	100527342	100327342	100727342	2013
1	GSA-rs34121575	0.001963	0.002819	0.9654	G	0.109	0.1758	0.005579	rs34121575	chr1	235045985	234845985	235245985	2013
12	ilmnseq_rs2306283_ilmndup2	0.001964	0.00282	0.9654	A	0.1537	0.2459	0.0009007	rs2306283	chr12	21176803	20976803	21376803	2009
3	rs718162	0.001964	0.002821	0.9654	C	0.1474	0.228	0.002844	rs718162	chr3	22553745	22353745	22753745	2013
23	rs1316520	0.001965	0.002822	0.9654	A	0.4017	0.294	0.001268	rs1316520	chrX	8952036	8752036	9152036	2013
11	GSA-rs74849641	0.001966	0.002823	0.9654	A	0.008547	0.03846	0.003259	rs74849641	chr11	3126239	2926239	3326239	2013
11	GSA-rs78675125	0.001966	0.002823	0.9654	A	0.008547	0.03867	0.003127	rs78675125	chr11	3127388	2927388	3327388	2013
19	GSA-rs4804592	0.001966	0.002823	0.9654	T	0.05128	0.1099	0.001649	rs4804592	chr19	11414718	11214718	11614718	2013
6	rs17839989	0.001968	0.002825	0.9654	C	0.1752	0.0989	0.001748	rs17839989	chr6	30101343	29901343	30301343	2013
8	rs6982326	0.001968	0.002825	0.9654	C	0.2564	0.3489	0.003771	rs6982326	chr8	123002393	122802393	123202393	2013
6	rs574892	0.00197	0.002829	0.9654	T	0.453	0.5522	0.004523	rs574892	chr6	91702821	91502821	91902821	2013
6	GSA-rs2358048	0.00197	0.002828	0.9654	A	0.4509	0.3407	0.001304	rs2358048	chr6	120676796	120476796	120876796	2013
11	rs1836884	0.001975	0.002835	0.9654	G	0.2329	0.1401	0.000754	rs1836884	chr11	89552782	89352782	89752782	2013
1	rs10913603	0.001981	0.002844	0.9654	T	0.1218	0.1951	0.003667	rs10913603	chr1	178676424	178476424	178876424	2013
3	rs9311194	0.001984	0.002847	0.9654	A	0.1346	0.06593	0.001319	rs9311194	chr3	38593580	38393580	38793580	2013
5	GSA-rs9314216	0.001984	0.002847	0.9654	A	0.2265	0.3214	0.002163	rs9314216	chr5	97953926	97753926	98153926	2013
3	rs12630707	0.001987	0.002851	0.9654	A	0.3889	0.4973	0.001768	rs12630707	chr3	113205928	113005928	113405928	2013
4	GSA-rs73876138	0.001989	0.002854	0.9654	A	0.01709	0.05495	0.00267	rs73876138	chr4	185666340	185466340	185866340	2013
10	rs12770412	0.001992	0.002858	0.9654	T	0.4145	0.5275	0.001193	rs12770412	chr10	35581785	35381785	35781785	2013
5	rs13168599	0.001992	0.002858	0.9654	A	0.2842	0.2005	0.005557	rs13168599	chr5	128723656	128523656	128923656	2013
8	GSA-rs12543948	0.001999	0.002868	0.9654	A	0.2457	0.1593	0.00232	rs12543948	chr8	66302717	66102717	66502717	2013
8	rs4909764	0.001999	0.002868	0.9654	C	0.109	0.04945	0.002012	rs4909764	chr8	138243674	138043674	138443674	2013
16	rs148315471	0.002001	0.00287	0.9654	T	0.02991	0.002747	0.003482	rs148315471	chr16	89510504	89310504	89710504	2013
4	rs12509616	0.002006	0.002877	0.9654	G	0.2137	0.3159	0.0008302	rs12509616	chr4	29762868	29562868	29962868	2013
12	rs10860882	0.002007	0.002878	0.9654	C	0.3034	0.2033	0.001084	rs10860882	chr12	102577840	102377840	102777840	2013
1	rs72695115	0.002007	0.002879	0.9654	C	0.0406	0.008242	0.003906	rs72695115	chr1	119600746	119400746	119800746	2013
6	rs6941392	0.002011	0.002884	0.9654	T	0.2692	0.1786	0.002038	rs6941392	chr6	158022007	157822007	158222007	2013
4	GSA-rs79453873	0.002015	0.002889	0.9654	A	0.002137	0.02473	0.003016	rs79453873	chr4	60723358	60523358	60923358	2013
4	rs6824174	0.002022	0.002898	0.9654	T	0.3013	0.2099	0.002981	rs6824174	chr4	45944123	45744123	46144123	2013
5	rs13169504	0.002024	0.0029	0.9654	G	0.2393	0.1511	0.001624	rs13169504	chr5	163072582	162872582	163272582	2013
1	rs112337824	0.002024	0.002901	0.9654	C	0.1517	0.239	0.001448	rs112337824	chr1	167253818	167053818	167453818	2013
23	rs6639885	0.002027	0.002906	0.9654	A	0.3863	0.2912	0.004243	rs6639885	chrX	7578126	7378126	7778126	2013
10	GSA-rs117801660	0.002027	0.002906	0.9654	A	0.05342	0.01374	0.002321	rs117801660	chr10	88638133	88438133	88838133	2013
1	GSA-rs7529169	0.002031	0.00291	0.9654	G	0.07543	0.1484	0.0007725	rs7529169	chr1	106445782	106245782	106645782	2013
6	rs11963560	0.002032	0.002912	0.9654	C	0.406	0.294	0.0008204	rs11963560	chr6	67032826	66832826	67232826	2013
5	rs16886829	0.002033	0.002913	0.9654	G	0.1116	0.05525	0.004318	rs16886829	chr5	57303299	57103299	57503299	2013
10	GSA-rs80214796	0.002037	0.002918	0.9654	A	0.05128	0.01374	0.003399	rs80214796	chr10	88978691	88778691	89178691	2013
1	rs2814779	0.002037	0.002919	0.9654	A	0.3996	0.283	0.0004626	rs2814779	chr1	159128922	158928922	159328922	2013
2	GSA-rs114176273	0.002039	0.002921	0.9654	G	0.002137	0.02542	0.002563	rs114176273	chr2	153713499	153513499	153913499	2013
16	rs8045278	0.00204	0.002922	0.9654	T	0.438	0.3379	0.003372	rs8045278	chr16	12690155	12490155	12890155	2013
10	rs78891629	0.002041	0.002924	0.9654	A	0.03205	0.07143	0.009237	rs78891629	chr10	122525402	122325402	122725402	2013
8	rs1078186	0.002042	0.002925	0.9654	C	0.5299	0.4121	0.0007378	rs1078186	chr8	100613250	100413250	100813250	2013
6	GSA-rs80253774	0.002045	0.002929	0.9654	G	0.07906	0.03297	0.005087	rs80253774	chr6	148468227	148268227	148668227	2013
10	rs72833889	0.002046	0.002931	0.9654	T	0.02564	0.06593	0.004601	rs72833889	chr10	124239855	124039855	124439855	2013
17	rs4790811	0.002048	0.002934	0.9654	A	0.4528	0.5604	0.002085	rs4790811	chr17	1311926	1111926	1511926	2013
14	rs11621493	0.002049	0.002935	0.9654	G	0.3248	0.2293	0.002457	rs11621493	chr14	46692973	46492973	46892973	2013
19	rs11669988	0.002054	0.002941	0.9654	T	0.07082	0.1409	0.0009246	rs11669988	chr19	19144115	18944115	19344115	2013
9	GSA-rs943750	0.002055	0.002942	0.9654	C	0.2607	0.1621	0.0006273	rs943750	chr9	16486143	16286143	16686143	2013
6	GSA-rs6902789	0.002055	0.002943	0.9654	A	0.2597	0.3564	0.002644	rs6902789	chr6	104910316	104710316	105110316	2013
11	rs1954830	0.002058	0.002947	0.9654	C	0.1709	0.2555	0.00287	rs1954830	chr11	90985134	90785134	91185134	2013
18	rs10438931	0.00206	0.00295	0.9654	T	0.2714	0.3626	0.004794	rs10438931	chr18	31558703	31358703	31758703	2013
12	rs10047549	0.002061	0.002951	0.9654	A	0.1645	0.2527	0.001704	rs10047549	chr12	518271	318271	718271	2013
3	rs12163643	0.002064	0.002955	0.9654	T	0.1325	0.2265	0.0003881	rs12163643	chr3	14343572	14143572	14543572	2013
21	rs2824455	0.002064	0.002955	0.9654	T	0.3761	0.4698	0.006537	rs2824455	chr21	17696287	17496287	17896287	2013
15	GSA-rs113724599	0.002064	0.002955	0.9654	T	0.01282	0.0467	0.003105	rs113724599	chr15	63908475	63708475	64108475	2013
8	rs1283651	0.002064	0.002954	0.9654	C	0.3333	0.4282	0.00512	rs1283651	chr8	107353803	107153803	107553803	2013
2	GSA-rs13398870	0.002066	0.002957	0.9654	C	0.08761	0.1593	0.001523	rs13398870	chr2	136949107	136749107	137149107	2013
2	rs72914212	0.002067	0.002959	0.9654	A	0.1282	0.06868	0.004919	rs72914212	chr2	198234197	198034197	198434197	2013
8	GSA-rs1477555	0.00207	0.002963	0.9654	C	0.307	0.2175	0.00433	rs1477555	chr8	67737451	67537451	67937451	2013
12	rs7953873	0.002074	0.002967	0.9654	G	0.3932	0.4835	0.009067	rs7953873	chr12	42794651	42594651	42994651	2013
13	rs876336	0.002074	0.002968	0.9654	A	0	0.02198	0.001301	rs876336	chr13	72536389	72336389	72736389	2013
19	GSA-rs73511194	0.002075	0.002969	0.9654	C	0.156	0.2308	0.006238	rs73511194	chr19	16466470	16266470	16666470	2013
8	rs1283658	0.002076	0.00297	0.9654	A	0.2991	0.3929	0.004649	rs1283658	chr8	107365118	107165118	107565118	2013
10	GSA-rs7911910	0.002078	0.002974	0.9654	A	0.3269	0.4333	0.001699	rs7911910	chr10	124342904	124142904	124542904	2013
1	rs4908507	0.002079	0.002974	0.9654	C	0.3205	0.4176	0.00387	rs4908507	chr1	8678877	8478877	8878877	2013
3	GSA-rs117509503	0.002079	0.002975	0.9654	A	0	0.02198	0.00127	rs117509503	chr3	172290842	172090842	172490842	2013
23	rs2294016	0.002081	0.002977	0.9654	T	0.07692	0.1401	0.003129	rs2294016	chrX	49237060	49037060	49437060	2013
9	GSA-rs55722858	0.002084	0.002982	0.9654	C	0.02991	0.002747	0.003482	rs55722858	chr9	14105286	13905286	14305286	2013
2	rs11678930	0.002086	0.002984	0.9654	T	0.1453	0.07692	0.002196	rs11678930	chr2	222973864	222773864	223173864	2013
3	GSA-rs4256145	0.002092	0.002992	0.9654	A	0.391	0.4725	0.01838	rs4256145	chr3	161992352	161792352	162192352	2013
6	GSA-rs236410	0.002093	0.002993	0.9654	T	0.2244	0.1464	0.004558	rs236410	chr6	36787624	36587624	36987624	2013
12	rs2118433	0.002094	0.002995	0.9654	A	0.3803	0.4945	0.000969	rs2118433	chr12	70105194	69905194	70305194	2013
17	seq-rs8834	0.002098	0.003001	0.9654	C	0.2329	0.3194	0.005456	rs8834	chr17	4897898	4697898	5097898	2013
15	rs114881348	0.002102	0.003006	0.9654	G	0.03205	0.005495	0.007231	rs114881348	chr15	40464570	40264570	40664570	2013
3	rs10049380	0.002103	0.003007	0.9654	C	0.4701	0.3736	0.005276	rs10049380	chr3	124768595	124568595	124968595	2013
12	GSA-rs7300198	0.002103	0.003008	0.9654	C	0.1688	0.1016	0.005535	rs7300198	chr12	131842822	131642822	132042822	2013
6	rs9375543	0.002107	0.003012	0.9654	C	0.3291	0.2253	0.0009859	rs9375543	chr6	127989994	127789994	128189994	2013
10	rs11017927	0.002108	0.003013	0.9654	G	0.3269	0.221	0.0007573	rs11017927	chr10	127409756	127209756	127609756	2013
19	rs2280434	0.002114	0.003022	0.9654	A	0.1496	0.2293	0.003315	rs2280434	chr19	15551920	15351920	15751920	2013
6	GSA-rs1398817	0.002116	0.003024	0.9654	G	0.3262	0.4231	0.004089	rs1398817	chr6	130402321	130202321	130602321	2013
2	rs79356812	0.002117	0.003026	0.9654	G	0	0.01099	0.02301	rs79356812	chr2	35970035	35770035	36170035	2013
2	rs34074851	0.002119	0.003028	0.9654	T	0.5064	0.4088	0.005186	rs34074851	chr2	227573361	227373361	227773361	2013
4	rs6844932	0.00212	0.00303	0.9654	T	0.3355	0.2335	0.001317	rs6844932	chr4	17745399	17545399	17945399	2013
7	rs4148740	0.002133	0.003047	0.9654	G	0.2328	0.15	0.003028	rs4148740	chr7	87522786	87322786	87722786	2013
9	rs493014	0.002133	0.003047	0.9654	T	0.4103	0.4945	0.01532	rs493014	chr9	133320326	133120326	133520326	2013
14	rs145910254	0.002136	0.003052	0.9654	T	0	0.02198	0.00127	rs145910254	chr14	96268430	96068430	96468430	2013
9	GSA-rs648353	0.002136	0.003051	0.9654	C	0.1261	0.2088	0.001325	rs648353	chr9	133957704	133757704	134157704	2013
23	rs72612856	0.002141	0.003058	0.9654	T	0.04274	0.008242	0.002609	rs72612856	chrX	11794160	11594160	11994160	2013
7	rs11980518	0.002141	0.003058	0.9654	C	0.4013	0.5192	0.0007062	rs11980518	chr7	153664093	153464093	153864093	2013
6	GSA-rs12189950	0.002145	0.003064	0.9654	C	0.08333	0.1374	0.01237	rs12189950	chr6	119071285	118871285	119271285	2013
6	GSA-rs12214265	0.002145	0.003064	0.9654	C	0.08333	0.1374	0.01237	rs12214265	chr6	119079768	118879768	119279768	2013
11	rs4757100	0.002146	0.003064	0.9654	T	0.05556	0.01374	0.001581	rs4757100	chr11	13096528	12896528	13296528	2013
6	rs179974	0.002147	0.003066	0.9654	G	0.1838	0.2762	0.001531	rs179974	chr6	16362014	16162014	16562014	2013
1	rs3017627	0.002148	0.003067	0.9654	T	0.08333	0.1566	0.001034	rs3017627	chr1	111973832	111773832	112173832	2013
3	GSA-rs75606336	0.002149	0.003068	0.9654	A	0.1346	0.07143	0.003441	rs75606336	chr3	21233833	21033833	21433833	2013
10	rs670472	0.002149	0.003068	0.9654	T	0.25	0.1676	0.00403	rs670472	chr10	88253431	88053431	88453431	2013
23	JHU_X.10735036	0.00215	0.00307	0.9654	C	0	0.01923	0.002589	JHU_X.10735036	chrX	10735036	10535036	10935036	2009
8	rs12682122	0.00215	0.00307	0.9654	A	0.2876	0.3819	0.004107	rs12682122	chr8	30115904	29915904	30315904	2013
18	rs8087497	0.00215	0.00307	0.9654	A	0.1197	0.06044	0.003648	rs8087497	chr18	30407541	30207541	30607541	2013
6	GSA-rs1737071	0.002151	0.003071	0.9654	T	0.04701	0.1016	0.002319	rs1737071	chr6	29762580	29562580	29962580	2013
10	rs4750265	0.002154	0.003075	0.9654	A	0.04274	0.09615	0.002095	rs4750265	chr10	12797959	12597959	12997959	2013
9	GSA-rs7853484	0.002154	0.003076	0.9654	C	0.1818	0.1044	0.001848	rs7853484	chr9	100629356	100429356	100829356	2013
23	rs6645366	0.002154	0.003075	0.9654	T	0.3782	0.2735	0.001494	rs6645366	chrX	117712670	117512670	117912670	2013
2	rs6741861	0.002154	0.003075	0.9654	A	0.5256	0.4313	0.00692	rs6741861	chr2	191366858	191166858	191566858	2013
10	GSA-rs7089377	0.002155	0.003077	0.9654	G	0.265	0.3599	0.003215	rs7089377	chr10	16848650	16648650	17048650	2013
5	rs140356852	0.002155	0.003077	0.9654	A	0.05983	0.02473	0.01482	rs140356852	chr5	98400116	98200116	98600116	2013
8	rs17609053	0.00216	0.003084	0.9654	C	0.1816	0.1154	0.008403	rs17609053	chr8	15074538	14874538	15274538	2013
21	rs16996589	0.00216	0.003083	0.9654	G	0.297	0.2072	0.003349	rs16996589	chr21	38619221	38419221	38819221	2013
4	rs7683885	0.002166	0.003091	0.9654	T	0.1731	0.2486	0.00762	rs7683885	chr4	96818361	96618361	97018361	2013
2	rs2122013	0.002166	0.003091	0.9654	G	0.3632	0.4613	0.004327	rs2122013	chr2	176500870	176300870	176700870	2013
18	rs1558949	0.002173	0.003101	0.9654	G	0.4316	0.5412	0.001697	rs1558949	chr18	74286122	74086122	74486122	2013
2	GSA-rs11884290	0.002187	0.003119	0.9654	A	0.08974	0.1621	0.001526	rs11884290	chr2	136961640	136761640	137161640	2013
2	rs16827624	0.002187	0.003119	0.9654	A	0.2759	0.1813	0.001433	rs16827624	chr2	186216797	186016797	186416797	2013
23	rs12859513	0.002192	0.003126	0.9654	A	0.3568	0.261	0.003149	rs12859513	chrX	28769205	28569205	28969205	2013
6	rs1206108	0.002199	0.003135	0.9654	G	0.2051	0.2885	0.00534	rs1206108	chr6	96990873	96790873	97190873	2013
6	GSA-rs72846618	0.002201	0.003138	0.9654	T	0.1774	0.0989	0.001344	rs72846618	chr6	29815666	29615666	30015666	2013
6	rs72492273	0.002201	0.003138	0.9654	G	0.1774	0.0989	0.001344	rs72492273	chr6	29816171	29616171	30016171	2013
6	rs2394177	0.002201	0.003138	0.9654	G	0.1774	0.0989	0.001344	rs2394177	chr6	29819591	29619591	30019591	2013
6	GSA-rs3823321	0.002201	0.003138	0.9654	A	0.1774	0.0989	0.001344	rs3823321	chr6	29826689	29626689	30026689	2013
3	GSA-rs1477850	0.002201	0.003138	0.9654	T	0.4081	0.5165	0.001849	rs1477850	chr3	111158183	110958183	111358183	2013
3	rs28741676	0.002205	0.003143	0.9654	C	0.2115	0.1374	0.005637	rs28741676	chr3	9048838	8848838	9248838	2013
1	GSA-rs301806	0.002208	0.003147	0.9654	C	0.2244	0.3297	0.0006925	rs301806	chr1	8422017	8222017	8622017	2013
16	rs79369812	0.002214	0.003155	0.9654	A	0.004274	0.04121	0.0001872	rs79369812	chr16	74469195	74269195	74669195	2013
4	GSA-rs2350064	0.002215	0.003156	0.9654	T	0.1659	0.2514	0.002473	rs2350064	chr4	65843482	65643482	66043482	2013
1	rs1119040	0.002215	0.003157	0.9654	A	0.1631	0.09341	0.003303	rs1119040	chr1	114141796	113941796	114341796	2013
2	GSA-rs114481100	0.002221	0.003164	0.9654	T	0.002137	0.02473	0.003016	rs114481100	chr2	1313021	1113021	1513021	2013
1	rs12127618	0.002221	0.003164	0.9654	T	0.1132	0.06044	0.008327	rs12127618	chr1	90182436	89982436	90382436	2013
8	rs75055719	0.002222	0.003165	0.9654	T	0.02137	0.06319	0.002169	rs75055719	chr8	16123463	15923463	16323463	2013
10	rs7095932	0.002226	0.003171	0.9654	G	0.2671	0.3654	0.00236	rs7095932	chr10	126720080	126520080	126920080	2013
12	rs35989183	0.002226	0.003171	0.9654	T	0.09657	0.1676	0.002352	rs35989183	chr12	131611373	131411373	131811373	2013
3	GSA-rs2622704	0.002226	0.003172	0.9654	C	0.312	0.4203	0.001231	rs2622704	chr3	138071060	137871060	138271060	2013
1	rs11165110	0.002227	0.003173	0.9654	A	0.2051	0.1319	0.005589	rs11165110	chr1	94286912	94086912	94486912	2013
7	GSA-rs36916	0.002229	0.003176	0.9654	G	0.1795	0.2735	0.001199	rs36916	chr7	14963203	14763203	15163203	2013
12	GSA-rs1905144	0.002236	0.003185	0.9654	G	0.2778	0.1768	0.0006519	rs1905144	chr12	84256521	84056521	84456521	2013
11	rs79210094	0.002238	0.003187	0.9654	T	0.08547	0.03315	0.002038	rs79210094	chr11	75100709	74900709	75300709	2013
19	rs34223104	0.002244	0.003195	0.9654	C	0.02564	0.06868	0.002812	rs34223104	chr19	40991223	40791223	41191223	2013
15	rs2271406	0.00225	0.003203	0.9654	C	0.1068	0.0522	0.004582	rs2271406	chr15	57451881	57251881	57651881	2013
6	rs67829690	0.002252	0.003205	0.9654	T	0.2073	0.2967	0.002979	rs67829690	chr6	123532245	123332245	123732245	2013
4	GSA-rs56233332	0.002255	0.00321	0.9654	A	0.1154	0.1868	0.003861	rs56233332	chr4	88029227	87829227	88229227	2013
21	GSA-rs11702422	0.002257	0.003213	0.9654	C	0.2296	0.3287	0.001494	rs11702422	chr21	42316760	42116760	42516760	2013
2	rs17760899	0.00226	0.003217	0.9654	A	0.4466	0.3407	0.001978	rs17760899	chr2	173137900	172937900	173337900	2013
15	rs9708195	0.002261	0.003217	0.9654	A	0.309	0.2222	0.0054	rs9708195	chr15	27370765	27170765	27570765	2013
11	rs7111731	0.002261	0.003217	0.9654	T	0.04915	0.0989	0.005542	rs7111731	chr11	35163450	34963450	35363450	2013
3	rs12630536	0.002262	0.00322	0.9654	T	0.07906	0.1381	0.005875	rs12630536	chr3	195753542	195553542	195953542	2013
23	rs5917513	0.002263	0.00322	0.9654	G	0.3056	0.4176	0.0008055	rs5917513	chrX	37949288	37749288	38149288	2013
3	rs9856915	0.002265	0.003224	0.9654	C	0.3376	0.261	0.01716	rs9856915	chr3	24649258	24449258	24849258	2013
8	rs4840830	0.002266	0.003224	0.9654	A	0.1154	0.1951	0.00142	rs4840830	chr8	6351903	6151903	6551903	2013
4	rs6531533	0.002274	0.003235	0.9654	G	0.265	0.3654	0.00187	rs6531533	chr4	37393890	37193890	37593890	2013
10	exm2267138	0.002277	0.003239	0.9654	G	0.3291	0.4341	0.001912	exm2267138	chr10	126031899	125831899	126231899	2009
15	rs7164972	0.00228	0.003244	0.9654	T	0.4744	0.3626	0.001223	rs7164972	chr15	81416508	81216508	81616508	2013
4	rs7678831	0.002283	0.003247	0.9654	G	0.265	0.1648	0.0005565	rs7678831	chr4	158520386	158320386	158720386	2013
10	GSA-rs17422550	0.002287	0.003253	0.9654	C	0.02778	0	0.001351	rs17422550	chr10	7159638	6959638	7359638	2013
23	rs6614403	0.002288	0.003254	0.9654	T	0.2457	0.1703	0.008384	rs6614403	chrX	51348624	51148624	51548624	2013
11	GSA-rs1938746	0.002288	0.003254	0.9654	T	0.1688	0.2528	0.003022	rs1938746	chr11	56876109	56676109	57076109	2013
23	rs5930646	0.002288	0.003253	0.9654	G	0.3291	0.4505	0.0003469	rs5930646	chrX	126214863	126014863	126414863	2013
11	rs142096921	0.002289	0.003255	0.9654	A	0.01282	0.0467	0.003105	rs142096921	chr11	88722778	88522778	88922778	2013
10	rs34292172	0.00229	0.003256	0.9654	T	0.3269	0.2335	0.003101	rs34292172	chr10	7458331	7258331	7658331	2013
10	GSA-rs72807395	0.00229	0.003257	0.9654	G	0.06624	0.02198	0.002732	rs72807395	chr10	88840642	88640642	89040642	2013
10	GSA-rs34270879	0.00229	0.003257	0.9654	A	0.06624	0.02198	0.002732	rs34270879	chr10	88913289	88713289	89113289	2013
10	rs4880435	0.002291	0.003257	0.9654	C	0.3462	0.25	0.002782	rs4880435	chr10	132835824	132635824	133035824	2013
3	rs2077807	0.002292	0.00326	0.9654	C	0.1282	0.06319	0.001906	rs2077807	chr3	145507322	145307322	145707322	2013
2	rs10171285	0.002292	0.00326	0.9654	T	0.3996	0.2983	0.002514	rs10171285	chr2	164362629	164162629	164562629	2013
11	rs603595	0.002298	0.003268	0.9654	T	0.09615	0.04121	0.002371	rs603595	chr11	31204928	31004928	31404928	2013
18	rs9956106	0.002299	0.003268	0.9654	A	0.406	0.3022	0.001983	rs9956106	chr18	68246482	68046482	68446482	2013
13	rs9588906	0.002303	0.003274	0.9654	T	0.1132	0.1841	0.003922	rs9588906	chr13	90256455	90056455	90456455	2013
9	GSA-rs7024586	0.002304	0.003275	0.9654	G	0.344	0.4423	0.003882	rs7024586	chr9	5579212	5379212	5779212	2013
8	rs12543549	0.002305	0.003277	0.9654	A	0.09402	0.1593	0.004372	rs12543549	chr8	127668753	127468753	127868753	2013
1	rs831750	0.002305	0.003276	0.9654	C	0.1517	0.239	0.001448	rs831750	chr1	201190332	200990332	201390332	2013
20	GSA-rs2184436	0.002306	0.003278	0.9654	G	0.4145	0.511	0.005591	rs2184436	chr20	33325675	33125675	33525675	2013
5	GSA-rs60612037	0.002308	0.00328	0.9654	T	0.141	0.2225	0.00223	rs60612037	chr5	78774496	78574496	78974496	2013
19	rs8107465	0.002309	0.003282	0.9654	A	0.4145	0.5165	0.003417	rs8107465	chr19	13864562	13664562	14064562	2013
11	rs17149775	0.002309	0.003282	0.9654	G	0.06197	0.1291	0.0008518	rs17149775	chr11	69142110	68942110	69342110	2013
11	rs949081	0.002309	0.003281	0.9654	A	0.3526	0.2473	0.001081	rs949081	chr11	79600398	79400398	79800398	2013
16	rs35626	0.002319	0.003295	0.9654	G	0.2318	0.3315	0.001439	rs35626	chr16	16076757	15876757	16276757	2013
19	GSA-rs75842617	0.002323	0.0033	0.9654	G	0.05128	0.01099	0.001388	rs75842617	chr19	21408611	21208611	21608611	2013
5	rs4569864	0.002325	0.003303	0.9654	C	0.1239	0.06044	0.002058	rs4569864	chr5	123673718	123473718	123873718	2013
8	GSA-rs116317154	0.002329	0.003308	0.9654	T	0.1239	0.1833	0.01757	rs116317154	chr8	19112936	18912936	19312936	2013
12	GSA-rs74729359	0.002329	0.003308	0.9654	A	0.006438	0.04121	0.0006435	rs74729359	chr12	130645657	130445657	130845657	2013
23	exm2264764	0.00233	0.003309	0.9654	A	0.3504	0.4615	0.001168	exm2264764	chrX	91428477	91228477	91628477	2013
6	rs6928737	0.002337	0.003319	0.9654	G	0.344	0.4503	0.001858	rs6928737	chr6	165785132	165585132	165985132	2013
8	GSA-rs75533112	0.00234	0.003323	0.9654	G	0.04957	0.1077	0.001644	rs75533112	chr8	24077563	23877563	24277563	2013
11	rs72929313	0.002342	0.003325	0.9654	A	0.09402	0.1621	0.003102	rs72929313	chr11	34549140	34349140	34749140	2013
4	rs7664607	0.002342	0.003326	0.9654	C	0.1239	0.206	0.001345	rs7664607	chr4	59195042	58995042	59395042	2013
23	rs73438828	0.002346	0.00333	0.9654	C	0.2799	0.1868	0.001791	rs73438828	chrX	12766609	12566609	12966609	2013
9	GSA-rs10756424	0.002346	0.003332	0.9654	T	0.1261	0.1951	0.006554	rs10756424	chr9	12908447	12708447	13108447	2013
4	rs56117794	0.002347	0.003332	0.9654	A	0.2918	0.3846	0.004878	rs56117794	chr4	24286807	24086807	24486807	2013
11	rs1792509	0.002348	0.003334	0.9654	T	0.3376	0.2445	0.003547	rs1792509	chr11	56903333	56703333	57103333	2013
14	rs7155416	0.002348	0.003334	0.9654	T	0.08761	0.1401	0.01659	rs7155416	chr14	76485029	76285029	76685029	2013
2	rs1367226	0.002355	0.003343	0.9654	A	0.06197	0.1291	0.0008518	rs1367226	chr2	55862404	55662404	56062404	2013
3	rs9812544	0.002355	0.003343	0.9654	T	0.1816	0.1181	0.0118	rs9812544	chr3	191400077	191200077	191600077	2013
5	rs292969	0.002365	0.003356	0.9654	T	0.07692	0.03297	0.006984	rs292969	chr5	58615876	58415876	58815876	2013

## Sheet: Supplementary table 7
Number	CHR	SNP	UNADJ	GC	BONF	Allele	Freq_Affected	Freq_Unaffected	P_noethnicitycorr	SNPrs	Chrom Pos	chr	200kb-less		Number	200kb more	assembly	Genes							Number										Number
1	9	GSA-rs7024949	7.824e-06	1.613e-05	1	A	0.3739	0.5165	3.904e-05	rs7024949	29198981	chr9	28998981		1	29398982	2013	LINGO2							1										1
2	16	rs3087620	8.272e-06	1.7e-05	1	C	0.1154	0.217	7.22e-05	rs3087620	10529474	chr16	10329474		2	10729475	2013	ATF7IP2	LOC107984877	LINC01290	EMP2	TEKT5	LOC105371079		2										2
3	21	rs1297265	8.433e-06	1.73e-05	1	G	0.4893	0.3297	3.767e-06	rs1297265	15444731	chr21	15244731		3	15644732	2013	LOC105369292	LOC101927745	LOC124905055	LOC105369302	LOC124905056			3										3
4	23	rs1206209	8.464e-06	1.736e-05	1	T	0.3333	0.4918	3.795e-06	rs1206209	137477739	chrX	137277739		4	137677740	2013	LINC02931	ZIC3						4										4
5	15	GSA-rs8042868	1.148e-05	2.307e-05	1	T	0.34	0.1966	6.235e-06	rs8042868	43647443	chr15	43447443		5	43847444	2013	TP53BP1	MAP1A	PPIP5K1	CKMT1B	STRC	LOC124903598	CATSPER2	5	PPIP5K1P1-CATSPER2	CKMT1A	STRCP1	LOC124903599	CATSPER2P1	PDIA3	ELL3	SERF2	SERF2-C15ORF63	5	MIR1282	SERINC4	HYPK	MFAP1	WDR76
6	4	GSA-rs4146476	1.224e-05	2.451e-05	1	A	0.4013	0.5525	1.522e-05	rs4146476	65850854	chr4	65650854		6	66050855	2013	EPHA5	EPHA5-AS1	LOC105377258	LOC105377259	LOC105377260	LOC105377261		6										6
7	12	rs11837546	1.368e-05	2.719e-05	1	T	0.3568	0.511	8.082e-06	rs11837546	96221037	chr12	96021037		7	96421038	2013	LTA4H	LOC124902990	LOC105369923	LINC02452	ELK3	LOC124902991	CDK17	7										7
8	8	rs7827867	3.36e-05	6.293e-05	1	G	0.2821	0.1575	2.189e-05	rs7827867	6278990	chr8	6078990		8	6478991	2013	MCPH1-DT	MCPH1						8										8
9	3	rs7620372	3.376e-05	6.32e-05	1	C	0.3739	0.522	1.963e-05	rs7620372	111189547	chr3	110989547		9	111389548	2013	LOC151760	NECTIN3-AS1	NECTIN3	LOC124909493	LOC105374038	LOC105374039		9										9
10	1	rs1011903	4.311e-05	7.941e-05	1	C	0.2897	0.4176	0.0001212	rs1011903	93678162	chr1	93478162		10	93878163	2013	FNBP1L	BCAR3	BCAR3-AS1	LOC102723480	MIR760	DNTTIP2		10										10
11	3	rs169111	4.982e-05	9.091e-05	1	C	0.1175	0.2198	7.225e-05	rs169111	37474041	chr3	37274041		11	37674042	2013	GOLGA4	APRG1	ITGA9					11										11
12	4	rs6857589	5.032e-05	9.176e-05	1	T	0.2244	0.3544	3.496e-05	rs6857589	95292731	chr4	95092731		12	95492732	2013	BMPR1B	UNC5C	LOC124900736					12										12
13	1	rs72854394	5.226e-05	9.506e-05	1	G	0.3782	0.2473	5.972e-05	rs72854394	6319091	chr1	6119091		13	6519092	2013	CHD5	RPL22	RNF207-AS1	RNF207	ICMT	ICMT-DT	HES3	13	GPR153	ACOT7	HES2	ESPN	MIR4252	TNFRSF25	PLEKHG5	NOL9		13
14	1	GSA-rs72858315	5.226e-05	9.506e-05	1	C	0.3782	0.2473	5.972e-05	rs72858315	6324184	chr1	6124184		14	6524185	2013	CHD5	RPL22	RNF207-AS1	RNF207	ICMT	ICMT-DT	HES3	14	GPR153	ACOT7	HES2	ESPN	MIR4252	TNFRSF25	PLEKHG5	NOL9		14
15	3	rs9871209	5.254e-05	9.552e-05	1	C	0.3846	0.2582	0.0001192	rs9871209	62441255	chr3	62241255		15	62641256	2013	PTPRG	PTPRG-AS1	CEP15	FEZF2	LOC105377647	CADPS		15										15
16	1	rs1148759	5.256e-05	9.556e-05	1	C	0.3974	0.5414	3.664e-05	rs1148759	187343314	chr1	187143314		16	187543315	2013	LINC01036	LOC105371655	LINC01037	LOC105371656				16										16
17	9	GSA-rs7020291	5.498e-05	9.967e-05	1	T	0.103	0.03571	0.0002274	rs7020291	134517617	chr9	134317617		17	134717618	2013	RXRA	MIR4669	LOC105376311	LOC100506532	COL5A1	LOC124902300	COL5A1-AS1	17										17
18	23	rs5976172	5.876e-05	0.0001061	1	T	0.4295	0.5742	3.456e-05	rs5976172	138599306	chrX	138399306		18	138799307	2013	FGF13	MIR504	FGF13-AS1					18										18
19	16	rs12934429	5.892e-05	0.0001063	1	A	0.09829	0.1989	3.859e-05	rs12934429	6125291	chr16	5925291		19	6325292	2013	RBFOX1							19										19
20	10	rs11018230	5.997e-05	0.0001081	1	T	0.4359	0.3104	0.0002185	rs11018230	127620691	chr10	127420691		20	127820692	2013	DOCK1	LOC124902524	NPS	FOXI2				20										20
21	10	rs2494657	6.108e-05	0.00011	1	T	0.3483	0.4973	1.502e-05	rs2494657	99453522	chr10	99253522		21	99653523	2013	HPSE2	CNNM1	GOT1	GOT1-DT	LINC01475	NKX2-3	LOC124902589	21	SLC25A28	SLC25A28-DT	LOC105378450							21
22	11	rs662533	6.904e-05	0.0001233	1	T	0.2799	0.4148	4.531e-05	rs662533	79248310	chr11	79048310		22	79448311	2013	TENM4	MIR708	MIR5579					22										22
23	7	rs4716515	7.006e-05	0.000125	1	G	0.5342	0.3956	7.14e-05	rs4716515	157968382	chr7	157768382		23	158168383	2013	PTPRN2	PTPRN2-AS1	LOC105375613					23										23
24	6	rs4869694	7.558e-05	0.0001342	1	A	0.1325	0.05769	0.0003558	rs4869694	150800091	chr6	150600091		24	151000092	2013	PLEKHG1	LOC124901430	LOC124901431	MTHFD1L	ARL4AP5			24										24
25	3	GSA-rs1444768	7.61e-05	0.000135	1	A	0.1432	0.2555	4.534e-05	rs1444768	124205074	chr3	124005074		25	124405075	2013	KALRN	MIR5002	LOC105374077	MIR6083				25										25
26	8	rs17655231	8.126e-05	0.0001436	1	C	0.1695	0.08791	0.0006082	rs17655231	15059415	chr8	14859415		26	15259416	2013	SGCZ							26										26
27	1	rs2184345	8.91e-05	0.0001565	1	C	0.3868	0.5192	0.0001364	rs2184345	232675364	chr1	232475364		27	232875365	2013	SIPA1L2	LOC124904551	LINC01745	LINC01744	LOC107983960	MAP10	LOC101927711	27										27
28	20	rs6015313	9.168e-05	0.0001607	1	T	0.4081	0.2775	8.968e-05	rs6015313	58591135	chr20	58391135		28	58791136	2013	VAPB	APCDD1L	APCDD1L-DT	LINC01711	LOC107985410	STX16-NPEPL1	STX16	28	NPEPL1	LOC124904942	LOC105372695							28
29	8	rs72651258	9.21e-05	0.0001614	1	T	0.1068	0.03846	0.0002409	rs72651258	64056729	chr8	63856729		29	64256730	2013	LINC01414							29										29
30	15	rs1896195	9.252e-05	0.0001621	1	C	0.5577	0.4148	4.342e-05	rs1896195	26525409	chr15	26325409		30	26725410	2013	LINC02248	LOC105370740	GABRB3	LOC124903578				30										30

## Sheet: Supplementary table 8
Never vs ever infected	Cleared vs chronic	Cleared vs partially/fully chronic
A2M	AARSD1	A1CF
ABCA4	ABCA7	ABCB6
ABCB4	ABCA9	ABHD14A
ABCB6	ABCB5	ABHD14B
ABCC1	ABLIM3	ABHD17B
ABCD3	ABT1	ABHD17C
ABCF1	ACAD8	ABO
ABCG1	ACADVL	ACAT2
ABCG2	ACAT1	ACOT12
ABCG5	ACAT2	ACOT7
ABHD14A	ACKR3	ACP7
ABL1	ACOT12	ACSBG2
ABRAXAS1	ACOT8	ACSL1
ACAN	ACTG1P25	ACTG1P25
ACOT7	ACTN4	ACTL9
ACP6	ACTR8	ACTRT2
ACTN4	ADAD1	ACVR1B
ACTRT1	ADAM10	ACY1
ACY1	ADAM12	ADAM19
ADAM29	ADAM20	ADAM20
ADAT1	ADAM3B	ADAM21P1
ADCY6	ADAMTS16	ADAMTS10
ADGRB3	ADAMTS17	ADAMTS13
ADGRG2	ADAMTS20	ADAMTS16
ADI1	ADAMTS9-AS2	ADGRD1
ADIPOR1	ADCY2	ADH4
ADM	ADGB	ADIPOR1
ADM5	ADGRA2	ADORA1
ADORA1	ADGRB2	ADSS1
ADPRH	ADGRG1	AGBL3
AEN	ADGRL2	AGTR1
AFG1L	ADH4	AHNAK
AGBL3	ADI1	AHNAK2
AGPAT5	ADIPOR1	AIPL1
AGTRAP	ADORA1	AJAP1
AHDC1	AFAP1L1	AKAP1
AHR	AFG3L1P	AKAP10
AHSG	AGL	AKT1
AIFM2	AGMO	ALDH3A1
AKAP8	AHCTF1	ALOX12B
AKT1S1	AIRE	ALOX15P1
ALDH4A1	AK3	ALOX5AP
ALPL	ALCAM	ALOXE3
ALS2CL	ALDH1A2	AMER2
AMOT	ALDH1L1	AMZ2
AMPD3	ALG11	ANGPTL6
ANG	ALG1L1P	ANKDD1A
ANGPT2	ALLC	ANKK1
ANGPTL8	ALOX12	ANKLE2
ANK2	ANAPC1P6	ANKRD13C
ANKRD33B	ANGPTL6	ANKRD23
ANKRD44	ANGPTL7	ANKRD33
ANKRD55	ANKDD1A	ANKRD39
ANKRD63	ANKH	ANKRD55
ANKS1B	ANKK1	ANKZF1
ANKZF1	ANKMY1	AP4B1
ANP32A	ANKRD12	APH1B
ANXA11	ANKRD37	APLP1
AP1M2	AP1B1P1	APRT
AP2A1	AP3M1	ARHGAP11B
AP2S1	AP4B1	ARHGAP21
APAF1	APBB1	ARHGAP27P2
APCDD1L	APOA1	ARHGAP33
APLF	APOH	ARHGAP44
APRG1	APOLD1	ARHGDIG
APTX	AQP12A	ARHGEF1
ARF3	AQP9	ARHGEF37
ARFGEF3	ARAP2	ARID5B
ARFIP1	ARFIP2	ARL4A
ARGLU1	ARG2	ARMC6
ARHGAP29	ARGFX	ARMC9
ARHGAP29-AS1	ARHGAP10	ARMH1
ARHGAP31	ARHGAP45	ARNT2
ARHGAP35	ARHGEF37	ARPP19
ARID4B	ARHGEF40	ARSG
ARL4AP5	ARL15	ASB2
ARRB2	ARMC3	ASB5
ARRDC3	ARMC9	ASCL1
ART3	ARMH1	ASRGL1
ASF1A	ARVCF	ATG9A
ASIC4	ASB2	ATL2
ATF5	ASCL5	ATOSA
ATF7IP2	ASGR1	ATP10A
ATG4D	ASPM	ATP10B
ATG9A	AS-PTPRE	ATP10D
ATP10B	ASTILCS	ATP1A3
ATP13A3	ASTN2	ATP4A
ATP1B2	ATF4	ATP5MK
ATXN10	ATG2B	ATP6V1C2
AUH	ATG4B	ATP6V1E1
B3GALT4	ATM	ATP6V1E2
B4GALT4	ATN1	ATP8B4
BACE1	ATOH1	AURKB
BASP1P1	ATOX1	AURKC
BCAR3	ATP11A	AXIN1
BCL2L12	ATP11AUN	B3GNT7
BCL9	ATP11B	B9D1
BDNF	ATP1B1	BAIAP3
BHLHE41	ATP5F1D	BASP1
BICD1	ATP6V1C1	BASP1P1
BLACAT1	ATP6V1C2	BAX
BMF	ATP6V1E1	BBS9
BMP3	ATP6V1E2	BCAT1
BMP4	ATP7B	BCAT2
BMP7	ATXN3	BCL2L13
BMPR1B	B3GALT1	BCL2L15
BMS1P20	B3GALT4	BCRP3
BMS1P21	B3GLCT	BECN2
BPGM	B3GNT5	BEST4
BRD3	B3GNT7	BFSP2
BUB1B	BAALC	BID
C17orf107	BAALC-AS1	BIRC8
C17orf75	BBS9	BMNCR
C18orf63	BCAP29	BMS1
C19orf84	BCAR4	BNIP5
C1D	BCL2L13	BORCS5
C1GALT1C1L	BCL2L15	BORCS6
C1orf167	BCL6B	BPESC1
C1QTNF2	BDKRB1	BPGM
C22orf39	BEST4	BRD10
C2orf66	BID	BRD2
C3orf20	BLTP1	BRPF3
C6orf89	BLZF1	BTBD19
C8orf88	BNIP2	BTG2
C9orf92	BOC	BTG3
CACNB3	BPHL	BTG4
CADPS	BPIFC	C12orf42
CALD1	BRCA1	C12orf56
CALHM2	BRD10	C17orf100
CAMK1D	BRD2	C19orf18
CAMTA2	BSG	C1QTNF8
CAND1.11	BTBD19	C1QTNF9
CAND2	BTN1A1	C20orf202
CAPN12	BTNL2	C20orf96
CAPN6	BUD13	C21orf91
CAPRIN2	C10orf55	C3
CAPS2	C10orf67	C3P1
CARMIL1	C11orf65	C5orf52
CASQ2	C11orf71	C5orf67
CAST	C12orf57	C6orf132
CATSPER2	C13orf42	C9orf153
CAV3	C14orf132	C9orf57
CCDC116	C15orf62	C9orf85
CCDC122	C16orf78	CA10
CCDC138	C17orf49	CA11
CCDC14	C19orf33	CA12
CCDC150	C19orf54	CAB39L
CCDC158	C1QTNF9	CABCOCO1
CCDC159	C1R	CACFD1
CCDC171	C1S	CACNA1B
CCDC174	C22orf15	CACNA1H
CCDC179	C22orf42	CACNG2-DT
CCDC192	C2CD4C	CADM4
CCDC3	C2orf50	CALB1
CCDC34	C2orf72	CALD1
CCDC65	C3P1	CALHM1
CCER2	C5orf22	CAMK2N1
CCNE2	C6orf132	CAP2
CCNJL	C6orf147	CAPN15
CCR2	C6orf15	CAPS
CCT5	C6orf58	CASC15
CD101	C7orf25	CASP3
CD300LG	C8orf90	CASP7
CD33	C9orf153	CAST
CD68	CABIN1	CBFA2T3
CD80	CACNA1D	CCDC197
CDC37	CACNA1I	CCDC33
CDC42EP4	CACNA1S	CCDC8
CDC42SE2	CACNA2D1	CCDC85A
CDH17	CACNA2D3	CCDC86
CDK17	CADM4	CCDC91
CDK18	CADPS	CCER2
CDK5R1	CALB1	CCK
CDKN2D	CAMK2G	CCN4
CDON	CAMTA1	CCND3
CEACAM18	CAPN10	CCT4
CEP15	CARD8	CD177
CEP162	CARD8-AS1	CD244
CEP164	CASC8	CD27
CEP20	CASP2	CD44
CEP43	CASR	CD48
CEP78	CASZ1	CD5
CFAP58	CATSPERB	CD70
CFAP97D1	CATSPERG	CD79A
CFDP1	CAVIN4	CD84
CHD3	CBARP	CD9
CHD5	CBLB	CD99
CHIT1	CBLL1	CDA
CHPF	CBLN1	CDADC1
CHRDL1	CCAT2	CDC37
CHRNA7	CCDC102A	CDC42P3
CHRNE	CCDC110	CDC5L
CHST1	CCDC112	CDCA4
CHST5	CCDC126	CDH13
CHSY1	CCDC14	CDH18
CIMAP1C	CCDC169	CDH4
CITED1	CCDC181	CDK5RAP2
CKMT1A	CCDC190	CDKL5
CLDN20	CCDC197	CDT1
CLDND1	CCDC198	CEACAM4
CLDND2	CCDC200	CECR2
CLIC6	CCDC25	CEDORA
CLIP2	CCDC3	CELF2
CLTCL1	CCDC70	CEMIP
CLVS2	CCDC85A	CENPJ
CMBL	CCDC96	CENPU
CNDP1	CCHCR1	CEP112
CNNM1	CCND3	CEP170B
CNOT2	CD177	CERS1
CNPPD1	CD200R1	CFAP20DC-DT
CNRIP1	CD52	CFAP418
CNTNAP4	CD86	CFAP65
COL11A2	CDC34	CFAP69
COL26A1	CDC37L1	CGB2
COL2A1	CDH10	CHD3
COL5A1	CDKN2AIP	CHD5
COL9A3	CDRT15P1	CHFR
COMMD9	CDSN	CHI3L1
CORO2B	CDX2	CHIT1
CPHXL	CECR2	CHMP2B
CPNE5	CELF2	CHN2
CPOX	CENPBD1P	CHN2-AS1
CPQ	CENPS-CORT	CHODL
CPSF4L	CEP112	CILP
CPT1C	CEP85	CIMIP1
CRAT37	CERS3	CIMIP3
CRCT1	CETN1	CIMIP4
CRIPTO	CFAP410	CISD3
CRIPTO3	CFAP96	CKMT2
CRMA	CFHR2	CLBA1
CRNN	CHAC1	CLCN3
CROT	CHCHD1	CLEC19A
CRYBG1	CHCHD10	CLEC2L
CRYGS	CHD8	CLPX
CSPG4	CHDH	CMPK2
CSTF2T	CHI3L1	CNBD1
CT69	CHIC2	CNNM3
CT83	CHIT1	CNOT6
CTCFL	CHRNA2	CNOT7
CTNNA2	CHRNA7	CNPPD1
CTU1	CIAPIN1	CNR1
CTU2	CIBAR1P2	CNTLN
CUTA	CIBAR2	CNTROB
CXCL16	CILP	COL4A1
CYB5A	CIMAP1D	COL5A3
CYB5D1	CIMIP3	COLCA1
CYB5R1	CIRBP	COMMD1
CYB5R4	CITED4	COMMD4P1
CYBA	CKMT2	COMMD4P2
CYP2A6	CLCN1	COMMD8
CYP4F12	CLDN22	COMP
CYP7A1	CLEC10A	COPB2
DACT3	CLMAT3	COPE
DAXX	CLPX	COPS9
DCDC1	CLSTN3	COQ7
DCHS1	CLU	COX16
DCPS	CLUL1	COX6B1
DCTN6	CLVS2	COX8A
DCX	CNGA2	CPB1
DDN	CNST	CPNE8
DDX23	COG5	CPPED1
DDX25	COL11A2	CPS1
DEPP1	COL14A1	CPSF2
DES	COL16A1	CPVL
DGCR2	COL4A1	CREB5
DGCR5	COL5A3	CRTC1
DGKG	COLEC11	CRYAA
DHH	COLEC12	CSE1L
DHX8	COMMD9	CSF2RB
DIAPH2	COMT	CSGALNACT2
DIPK1C	COPS8-DT	CSMD1
DIRAS2	COQ8B	CTAGE1
DISC1	COQ9	CTBP1
DISC1FP1	CORT	CTC1
DISP3	COX10	CTD-2154B17.1
DLG1	COX16	CTH
DLGAP1	CPPED1	CTNND2
DMD	CPSF2	CTSB
DNAAF10	CRB1	CTSD
DNAH2	CRIPT	CTU2
DNAJA1	CRYBG2	CWC22
DNAJB11	CSMD1	CWC25
DNAJB2	CSMD3	CXADR
DNAJC25	CSRP1	CYB5R1
DNM1P35	CTDNEP1	CYBA
DNM2	CTNND2	CYFIP2
DNPEP	CTSA	CYP11A1
DNTTIP2	CUL5	CYP11B1
DOCK1	CUTA	CYP1B1
DOCK10	CYB5R1	CYP3A4
DOCK5	CYB5R4	CYTH2
DOCK6	CYFIP1	D21S2088E
DOLK	CYP2A6	DAP
DPH1	CYTH2	DAZL
DPY19L4	D2HGDH	DBP
DRAM1	DAPK1	DCBLD1
DRAXIN	DAXX	DCHS2
DSCAML1	DAZAP1	DCLRE1B
DTNA	DAZL	DDOST
DUSP3	DBH	DDX24
DUSP7	DBNDD1	DDX27
DUXB	DCBLD1	DDX49
DYNC2I2	DCHS1	DECR1
DYNC2LI1	DCLK1	DECR2
DYNLRB2-AS1	DCLRE1B	DEFB127
EBF4	DCTD	DEFB130B
ECE1	DCUN1D1	DEFB132
ECH1	DDOST	DEFB134
ECPAS	DDR1	DERL1
ECT2	DDR2	DGKQ
EDAR	DDT	DHDH
EDDM3A	DDX24	DHRSX
EFNB2	DDX47	DIRC3
EFNB3	DECR1	DIS3L
EGILA	DEF8	DISC1FP1
EGLN3	DENND4A	DLG2
EIF2AK4	DEPTOR	DLGAP1
EIF3K	DERL3	DLGAP2
EIF4A1	DFFA	DMD
EIF4G3	DGCR8	DMRT1
EIPR1	DGKD	DMRTB1
ELAVL3	DHDDS	DMRTC2
ELF1	DHRS12	DNAH9
ELK3	DHRS7B	DNAI2
ELK4	DHX30	DNAJB2
ELL2	DHX32	DNM1L
ELL3	DIAPH2	DNMT1
ELMO1	DIP2C	DNPEP
EMB	DISC1FP1	DOCK9
EMP2	DISP3	DOK7
ENDOG	DLG4	DPH3
ENDOU	DLL4	DPY19L2P4
ENO3	DMAC1	DRD2
EPB41L3	DMD	DSCAM
EPHA5	DNAH11	DUSP16
EPHA7	DNAJB3	DUXA
EPOR	DNAJC17	DYNLT4
ERCC6L	DNAJC18	EDDM13
ESPN	DNHD1	EDN3
ESRP1	DNM1P46	EEF1G
ESS2	DNMT1	EFCAB6
ETAA1	DNMT3L	EFCAB6-DT
ETFB	DNTTIP1	EFEMP1
ETV4	DOCK1	EGF
EVX1	DOCK9	EHD4
EXOSC2	DOK4	EHMT1
EYA3	DOK6	EIF1
F2RL2	DOK7	EIF2B3
F3	DPH3	EIF3G
FABP6	DPP8	EIF4E
FAM118B	DPPA2P3	EIF4G2
FAM184A	DPPA5	ELFN1
FAM200C	DPY19L1	ELOVL6
FAM230E	DRC7	EMP3
FAM240A	DRD2	ENKUR
FAM246C	DROSHA	ENPEP
FAM43A	DSC1	EPAS1
FAM47E	DSEL-AS1	EPHA5
FAM76A	DSTNP2	EPOP
FAM85B	DTX3L	ERAP1
FARS2	DTYMK	ERBB4
FBLN1	DUS4L	ERCC6L2
FBXO2	DUSP28	ERFL
FBXO22	DVL2	ERG
FBXO44	DYNC1I1	ERMP1
FBXO48	DYNLT4	ERO1B
FBXO6	E2F7	ESD
FETUB	EAF2	ETHE1
FEZF2	EBLN3P	ETS1
FGD2	ECE1	ETS2
FGD5	ECRG4	ETV2
FGF13	ECSCR	ETV7
FGR	EDA2R	EXO1
FHDC1	EEA1	EXTL3
FHL5	EFNA2	FABP4
FIBCD1	EGLN2	FAM157B
FIP1L1	EGLN3-AS1	FAM161A
FKBP11	EIF2B3	FAM178B
FKRP	EIF3G	FAM200A
FLG	EIF3K	FAM225A
FMR1-AS1	EIF4E	FAM234A
FNBP1L	EIF4G3	FAM43A
FOXI2	EIPR1	FAM43B
FOXO1	ELAVL2	FAM66D
FOXO3	EMG1	FAM83E
FOXRED1	EMP3	FAM90A27P
FSIP1	ENO2	FAM9C
FSTL5	ENOPH1	FAN1
FUT9	ENOSF1	FBLL1
FUZ	ENTHD1	FBLN2
FXR2	ENTPD4	FBXL12
FYN	EPHA1	FBXL17
GABARAPL2	EPHX2	FBXL22
GABBR1	EQTN	FBXO16
GABRB3	ERCC6L2	FBXO17
GALNT11	ERICH3	FBXO47
GALNTL6	ERLIN2	FBXO5
GAS2	ERMP1	FDFT1
GCLM	ERN1	FDX2
GDNF	ERO1B	FER1L5
GGACT	ERP44	FER1L6
GGT3P	ESCO2	FEZ1
GJA8	ETHE1	FGA
GJE1	ETS1	FGD4
GLB1L	F13B	FGF12
GLI3	FAM124A	FGF21
GLIPR1	FAM131B	FGFRL1
GLTPD2	FAM13A	FGG
GMPPA	FAM157C	FHIT
GNG10	FAM163B	FIGNL2
GNG8	FAM170A	FKBP15
GNL1	FAM174C	FKBP1A
GNPTAB	FAM181A	FKBP1AP1
GOLGA4	FAM221A	FKBP1A-SDCBP2
GOLGA6EP	FAM225A	FLI1
GOLPH3	FAM234B	FLRT1
GOT1	FAM240C	FLT4
GP1BA	FAM241A	FMC1-LUC7L2
GPAM	FAM3B	FMO1
GPAT3	FAM81A	FMOD
GPR15	FAM98C	FNDC3A
GPR153	FAM9C	FNDC9
GPR176	FANCA	FOXL2
GPR62	FANK1	FRGCA
GRIP2	FAT2	FRMPD4
GRM4	FATE1	FSHR
GRPEL1	FBLN5	FSIP1
GSC2	FBXL12	FSTL5
GTF2H5	FBXL7	FTL
GTF2I	FBXO11	FUT1
GTF3C3	FBXO21	FUT2
GVINP1	FBXO40	FUT3
H3-5	FBXO5	FXYD1
HAPLN3	FBXW11	FZD3
HCG17	FBXW8	GABPB1
HCG24	FGF22	GABRB1
HCG4	FGL1	GABRB2
HCG4B	FIGN	GABRG3
HCN1	FKBP15	GACAT2
HCP5B	FLJ20712	GAK
HDAC7	FLJ33534	GALNS
HDAC8	FLRT3	GALNT15
HECW2	FLT3	GALNTL5
HEG1	FMO1	GALP
HELQ	FOXB1	GAPDH
HES2	FOXB2	GAPDHS
HGF	FOXR2	GAPLINC
HIC1	FPGT	GAPT
HINT1	FREM2	GAREM1
HIRA	FRMPD4	GARIN3
HK1	FRRS1	GAS7
HLA-A	FST	GATA4
HMGA1	FSTL3	GATA6
HNRNPL	FUT11	GBGT1
HOTAIRM1	FZD6	GCNT1
HOTTIP	G6PC1	GDA
HOXA1	GABARAP	GDF1
HOXA10	GABRB1	GGT1
HOXA2	GABRE	GGTLC2
HPS1	GABRG3	GIGYF2
HPSE2	GAL3ST2	GJC3
HPYR1	GALNT15	GLB1L
HRG	GALR1	GLIS1
HS3ST2	GAMT	GML
HS3ST4	GAS1	GNPTG
HSALR1	GAS8	GOLGA3
HSD17B8	GATD3	GOLGA6A
HSPC102	GCHFR	GOLGA6FP
HTATIP2	GCNT3	GOLM1
HTR6	GCSIR	GPR108
HYPK	GDNF	GPR132
IAPP	GGN	GPR137B
ICMT	GLB1L2	GPR153
IDH3B	GLCCI1	GPR17
IFFO2	GLIS3	GPR62
IFI6	GLRX5	GRAMD1A
IFITM4P	GMDS-DT	GRASLND
IFT22	GNA14	GRHL3
IGLON5	GNB1L	GRIA3
IKBIP	GOLGB1	GRIN2B
IL12A	GOLM1	GRIN2D
IL17C	GOPC	GRM2
IL4I1	GP1BB	GRPR
IL6ST	GPC1	GRWD1
ILF3	GPHN	GSC
ILK	GPR137B	GUCA1A
IMP3	GPR20	GUCD1
INCA1	GPR35	GUCY2D
INHA	GPR55	GUCY2F
INTS8	GPRC5A	GYG1
IPO8	GPX4	GYPC
IQCF1	GRIA3	GYS1
IQCJ	GRID2	H19
IQGAP2	GRIN2D	HAAO
IQSEC1	GRIP2	HABP2
IRAG1-AS1	GRPEL1	HAS2
IRF3	GRWD1	HAUS5
ISG20	GSC	HAVCR1
ITGA1	GSE1	HBA1
ITGA9	GSG1	HBQ1
ITGB5	GSTA1	HCST
KALRN	GSTK1	HDAC11
KANK2	GSTT1	HDC
KARS1	GSX1	HECW1
KBTBD6	GSX2	HEPHL1
KBTBD7	GTF2A2	HERC1
KCNE4	GTF2E1	HERC2P10
KCNK16	GTF2H4	HES3
KCNQ3	GTPBP8	HES7
KDM6B	GUCA1A	HGFAC
KEAP1	GUCA1B	HIF3A
KIF1C	GUCY1B2	HIPK1
KIF26B	GVINP1	HIPK2
KIF6	GYPC	HLA-DQB1
KIFC1	GZMM	HLTF
KIRREL3	H2BC10	HMGB1
KLF4	H4C8	HMGXB3
KLF6	HACD2	HNRNPL
KLHL12	HACD3	HNRNPM
KLK10	HCG11	HOATZ
KLRG1	HCG21	HOMER3
KMT2D	HCG23	HPF1
KRI1	HCG24	HPN
KRR1	HCG25	HPS3
KRT4	HCG26	HS3ST4
KYAT1	HCG27	HSALR1
LACC1	HCG4	HSBP1
LAMC3	HCG9	HSD17B14
LCE3C	HCLS1	HSF2BP
LDLR	HCN2	HSPB6
LDLRAD3	HCP5	HTR2A
LEMD1	HCP5B	HTR3A
LEPROTL1	HCRTR1	ICAM4
LGALS4	HDAC9	ICE1
LGR4	HEBP1	ICMT
LHFPL1	HECW1	IDUA
LIM2	HEG1	IER5
LIN7C	HEPFAL	IFFO1
LINC00160	HEPH	IFI27
LINC00222	HERC3	IFITM10
LINC00251	HEY1	IFNGR1
LINC00312	HGD	IFNLR1
LINC00331	HGFAC	IFT27
LINC00362	HIGD2AP2	IGF1R
LINC00378	HIPK1	IGF2R
LINC00383	HJURP	IGFL2
LINC00390	HLA-A	IGFLR1
LINC00424	HLA-DPA1	IGSF22
LINC00443	HLA-DRA	IHH
LINC00524	HMGN2	IL17C
LINC00526	HMGN4	IL22RA1
LINC00582	HMGXB3	IL22RA2
LINC00612	HNRNPC	IMPA1
LINC00621	HNRNPD	INA
LINC00659	HP1BP3	INF2
LINC00667	HPX	INPP5D
LINC00678	HRK	INTS1
LINC00696	HSD17B4	INTS9
LINC00857	HSD17B7	IQCF1
LINC00906	HSD17B8	IQSEC1
LINC00941	HSP90AB4P	IRF2
LINC00951	HSPB3	IRGQ
LINC01007	HSPBAP1	IRS2
LINC01010	HSPH1	ISCA1
LINC01015	HTATSF1P2	ISLR
LINC01036	HTR2B	ITK
LINC01095	HTR7P1	ITPRIPL2
LINC01100	ICA1	IWS1
LINC01228	ICAM2	IZUMO1
LINC01242	ICE1	JCAD
LINC01250	ICOSLG	JMJD7
LINC01256	IFI27	KANK1
LINC01290	IFI35	KAZN
LINC01310	IFITM4P	KBTBD13
LINC01311	IFT74	KCNAB2
LINC01338	IGF2R	KCNAB3
LINC01348	IGFN1	KCNB1
LINC01353	IGSF22	KCNF1
LINC01376	IGSF9B	KCNJ14
LINC01378	IL13	KCNJ16
LINC01411	IL17RB	KCNJ2
LINC01414	IL2	KCNJ3
LINC01426	IL4	KCNN2
LINC01465	IL7	KCNN4
LINC01470	ILDR1	KCTD17
LINC01475	ILK	KCTD20
LINC01487	INAVA	KDELR1
LINC01501	ING2	KEAP1
LINC01509	ING5	KIAA0753
LINC01525	INO80	KIAA1614
LINC01532	INTS14	KICS2
LINC01586	INVS	KIF17
LINC01589	IQCB1	KIF26B
LINC01615	IRAK4	KIF2C
LINC01628	IRF1	KIRREL2
LINC01647	IRGC	KLHL12
LINC01649	IRS2	KLRG2
LINC01661	IRX1	KMT2B
LINC01711	IRX2	KRT13
LINC01735	ISCA1	LASP1
LINC01744	ISM1	LAYN
LINC01787	ITGB5	LBH
LINC01799	ITM2C	LCLAT1
LINC01822	ITPKC	LGI4
LINC01828	JAM3	LGR5
LINC01872	JARID2	LHB
LINC01893	KATNB1	LIMASI
LINC01908	KATNBL1P6	LIMS2
LINC01913	KAZN	LIN37
LINC01922	KBTBD13	LINC00052
LINC01950	KCNF1	LINC00102
LINC01968	KCNJ12	LINC00114
LINC01995	KCNJ14	LINC00173
LINC02006	KCNJ16	LINC00235
LINC02009	KCNJ3	LINC00269
LINC02011	KCNK6	LINC00276
LINC02020	KCNQ4	LINC00305
LINC02022	KCNQ5	LINC00313
LINC02031	KDELR1	LINC00322
LINC02052	KHDC1	LINC00324
LINC02107	KIAA0232	LINC00347
LINC02125	KIAA0408	LINC00377
LINC02209	KIF17	LINC00381
LINC02212	KIF1A	LINC00396
LINC02247	KIF21A	LINC00404
LINC02248	KIF21B	LINC00463
LINC02262	KIF2C	LINC00466
LINC02284	KIFC1	LINC00471
LINC02314	KIFC3	LINC00477
LINC02331	KL	LINC00487
LINC02348	KLF15	LINC00528
LINC02354	KLF9	LINC00534
LINC02394	KLHL12	LINC00538
LINC02422	KNL1	LINC00564
LINC02429	KPNA1	LINC00566
LINC02447	L3MBTL3	LINC00621
LINC02452	LAD1	LINC00638
LINC02453	LAMP3	LINC00670
LINC02462	LDC1P	LINC00674
LINC02519	LDLRAD3	LINC00690
LINC02532	LIG1	LINC00703
LINC02544	LIN28A	LINC00861
LINC02567	LIN7A	LINC00904
LINC02569	LINC00032	LINC00955
LINC02574	LINC00111	LINC00964
LINC02594	LINC00301	LINC00974
LINC02607	LINC00311	LINC01028
LINC02612	LINC00390	LINC01036
LINC02619	LINC00396	LINC01043
LINC02620	LINC00423	LINC01053
LINC02621	LINC00437	LINC01058
LINC02636	LINC00471	LINC01060
LINC02639	LINC00479	LINC01070
LINC02669	LINC00484	LINC01085
LINC02684	LINC00511	LINC01121
LINC02685	LINC00525	LINC01141
LINC02687	LINC00528	LINC01150
LINC02697	LINC00534	LINC01151
LINC02711	LINC00536	LINC01182
LINC02714	LINC00543	LINC01204
LINC02718	LINC00561	LINC01216
LINC02735	LINC00575	LINC01219
LINC02769	LINC00641	LINC01230
LINC02790	LINC00671	LINC01264
LINC02821	LINC00673	LINC01269
LINC02829	LINC00690	LINC01298
LINC02852	LINC00698	LINC01353
LINC02857	LINC00700	LINC01391
LINC02859	LINC00824	LINC01422
LINC02865	LINC00861	LINC01467
LINC02882	LINC00922	LINC01483
LINC02888	LINC00955	LINC01515
LINC02894	LINC00970	LINC01522
LINC02898	LINC01011	LINC01529
LINC02931	LINC01017	LINC01538
LINC02949	LINC01028	LINC01603
LINC02971	LINC01033	LINC01613
LINC02972	LINC01118	LINC01639
LINC03002	LINC01149	LINC01676
LINC03017	LINC01162	LINC01679
LINC03108	LINC01163	LINC01712
LINC03117	LINC01181	LINC01732
LINGO2	LINC01206	LINC01739
LMBR1L	LINC01226	LINC01742
LMCD1	LINC01235	LINC01766
LNCATV	LINC01237	LINC01774
LNX1	LINC01267	LINC01794
LOHAN2	LINC01270	LINC01801
LOXL4	LINC01300	LINC01812
LRFN2	LINC01340	LINC01813
LRPPRC	LINC01341	LINC01819
LRRC2	LINC01374	LINC01820
LRRC20	LINC01396	LINC01838
LRRC2-AS1	LINC01422	LINC01864
LRRC37A5P	LINC01447	LINC01873
LRRC4	LINC01448	LINC01878
LRRC69	LINC01483	LINC01895
LRRC8A	LINC01490	LINC01900
LRRN2	LINC01497	LINC01924
LRRTM4	LINC01549	LINC01936
LSG1	LINC01600	LINC01948
LSM6	LINC01605	LINC01950
LTA4H	LINC01607	LINC01954
LTF	LINC01638	LINC01968
LUCAT1	LINC01648	LINC01997
LYRM4	LINC01678	LINC02074
LYRM7	LINC01743	LINC02094
LYVE1	LINC01794	LINC02108
M6PR	LINC01813	LINC02111
MACROH2A2	LINC01815	LINC02141
MAD2L2	LINC01846	LINC02147
MAGI1	LINC01880	LINC02159
MAGI2	LINC01903	LINC02171
MALRD1	LINC01909	LINC02217
MAN1A1	LINC01916	LINC02222
MAN1A2	LINC01925	LINC02223
MAP10	LINC01954	LINC02250
MAP1A	LINC01963	LINC02255
MAP3K15	LINC02003	LINC02264
MAP4K1	LINC02005	LINC02275
MAPK1	LINC02026	LINC02301
MARCHF1	LINC02031	LINC02308
MARCHF6	LINC02038	LINC02344
MAS1L	LINC02040	LINC02353
MBL1P	LINC02044	LINC02362
MBNL1	LINC02047	LINC02375
MBOAT4	LINC02049	LINC02382
MCM9	LINC02098	LINC02400
MCPH1	LINC02107	LINC02406
MCTP2	LINC02114	LINC02411
MDM4	LINC02117	LINC02427
MEAT6	LINC02123	LINC02433
MED11	LINC02139	LINC02434
MED25	LINC02142	LINC02457
MELTF	LINC02151	LINC02506
MEOX1	LINC02162	LINC02508
MFAP1	LINC02171	LINC02568
MFGE8	LINC02226	LINC02583
MFSD4A	LINC02234	LINC02595
MFSD4B	LINC02239	LINC02623
MGAT4FP	LINC02240	LINC02624
MICOS10	LINC02265	LINC02625
MINK1	LINC02279	LINC02649
MIR10397	LINC02283	LINC02740
MIR10525	LINC02316	LINC02752
MIR1-1	LINC02318	LINC02768
MIR1179	LINC02328	LINC02775
MIR1181	LINC02348	LINC02781
MIR1200	LINC02375	LINC02800
MIR12125	LINC02406	LINC02816
MIR12133	LINC02411	LINC02835
MIR1238	LINC02433	LINC02840
MIR1243	LINC02445	LINC02855
MIR1275	LINC02447	LINC02858
MIR1282	LINC02463	LINC02888
MIR1287	LINC02464	LINC02899
MIR1290	LINC02521	LINC02905
MIR1292	LINC02536	LINC02914
MIR130B	LINC02539	LINC02934
MIR132	LINC02554	LINC02954
MIR133A2	LINC02558	LINC02957
MIR135B	LINC02570	LINC02965
MIR146A	LINC02571	LINC03004
MIR1470	LINC02575	LINC03021
MIR153-1	LINC02587	LINC03024
MIR196B	LINC02605	LINC03032
MIR212	LINC02645	LINC03039
MIR219A1	LINC02662	LINC03042
MIR301B	LINC02693	LINC03049
MIR3132	LINC02702	LINC03077
MIR3142	LINC02713	LINC03082
MIR3148	LINC02730	LINC03088
MIR3167	LINC02748	LINC03102
MIR3168	LINC02768	LINGO1
MIR320D1	LINC02834	LIPJ
MIR320E	LINC02840	LL22NC01-81G9.3
MIR3529	LINC02863	LL22NC03-63E9.3
MIR378D2	LINC02872	LMAN2L
MIR3939	LINC02888	LMTK3
MIR3976	LINC02893	LNCRI
MIR3977	LINC02902	LOH12CR2
MIR4252	LINC02903	LOHAN2
MIR4264	LINC02937	LRATD1
MIR4265	LINC02945	LRCH1
MIR4274	LINC02946	LRFN3
MIR4279	LINC02957	LRIT3
MIR4302	LINC03004	LRP1B
MIR4312	LINC03032	LRP6
MIR4313	LINC03091	LRPAP1
MIR4325	LIPC	LRRC75B
MIR4329	LITAF	LRRTM4
MIR4431	LIVAR	LSG1
MIR4439	LMO1	LSP1
MIR4444-2	LMTK3	LTBR
MIR4454	LNC-RHL1	LUC7L
MIR4480	LORICRIN	LUC7L2
MIR4485	LOXL2	LUNAR1
MIR4490	LPCAT3	LY6E
MIR4659A	LRMDA	LY9
MIR4669	LRP1B	LYPD3
MIR4685	LRP2BP	LYPD4
MIR4689	LRPAP1	LYZL1
MIR4695	LRRC19	LYZL4
MIR4722	LRRC23	MACROD1
MIR4748	LRRC3	MAD1L1
MIR4749	LRRC53	MAFK
MIR4753	LRRIQ3	MAGEB17
MIR4757	LSINCT5	MAGI1
MIR4762	LUADT1	MAGI1-IT1
MIR4796	LURAP1L	MAML3
MIR4798	LYAR	MAMSTR
MIR5002	LYPD3	MANCR
MIR5004	LYSMD4	MANSC1
MIR504	LYZL1	MAP1LC3B2
MIR5088	MACROD2	MAP1LC3C
MIR5092	MADCAM1	MAP2K1
MIR5189	MAGEA4	MAP2K4
MIR544B	MAILR	MAP3K2
MIR548B	MAP2K3	MAP3K9
MIR548Q	MAP3K20	MAP4K3
MIR548W	MAP4	MAPK13
MIR5579	MAP4K1	MAPK7
MIR5580	MAP4K3	MAPKBP1
MIR583	MARCHF1	MARK2
MIR587	MARCHF11	MAS1
MIR6083	MARCHF4	MB21D2
MIR6128	MAS1	MBD3L1
MIR6131	MASP1	MBTPS1
MIR621	MATR3	MECOM
MIR632	MBNL1	MED22
MIR638	MBP	MED31
MIR6718	MC1R	MED7
MIR6799	MCCC1	MEGF11
MIR6834	MCF2L2	MEIS1-AS3
MIR6835	MCM10	MEP1B
MIR6841	ME1	METAP1
MIR6864	MECOM	MFAP4
MIR6873	MEF2A	MFFP2
MIR6876	MEGF11	MFFP3
MIR6886	MEOX2	MGA
MIR708	MEP1B	MGAT1
MIR7154	METAP1	MGAT4FP
MIR7156	METTL3	MGC16275
MIR7159	MFFP2	MGC34796
MIR7-2	MFSD14A	MIATNB
MIR760	MGAT3	MICAL2
MIR7849	MGAT4FP	MICAL3
MIR8055	MIA	MICALL2
MIR8074	MIATNB	MIR103A1
MIR8079	MICA	MIR10522
MIR8080	MICAL3	MIR1181
MIR8087	MICB	MIR12121
MIR873	MIDN	MIR12125
MIR892A	MIEF1	MIR1244-4
MIR942	MIER2	MIR1269B
MIR9898	MIF	MIR1295A
MIRLET7I	MINDY2	MIR1307
MLLT3	MIR1183	MIR147A
MME	MIR12128	MIR153-1
MOCS2	MIR1226	MIR1913
MOG	MIR1244-1	MIR216A
MON2	MIR1256	MIR218-2
MPDU1	MIR1295A	MIR22
MPP2	MIR1302-5	MIR221
MRAP2	MIR1302-6	MIR2276
MRGBP	MIR1306	MIR22HG
MRPL17	MIR135A2	MIR3127
MRPL40	MIR141	MIR3131
MRPS12	MIR149	MIR3135B
MRPS18C	MIR185	MIR3150A
MRPS31	MIR195	MIR3155A
MTCH1	MIR1976	MIR3176
MTHFD1L	MIR200C	MIR3198-1
MTMR12	MIR2053	MIR34B
MTRF1	MIR216A	MIR3612
MUC13	MIR217	MIR3681
MUCL1	MIR219A1	MIR3684
MVD	MIR224	MIR378A
MYBPH	MIR2276	MIR3943
MYL10	MIR30C1	MIR4251
MYO1D	MIR3151	MIR4288
MYO9A	MIR3198-1	MIR4298
MYOG	MIR324	MIR4301
MYRFL	MIR3617	MIR4310
NAA16	MIR3618	MIR4311
NAA38	MIR3622A	MIR4314
NAF1	MIR3681	MIR4322
NALCN-AS1	MIR3684	MIR4490
NBL1	MIR378A	MIR4491
NBPF3	MIR3936	MIR4506
NCBP2	MIR4254	MIR4520-1
NCEH1	MIR4301	MIR4521
NCOR2	MIR4428	MIR4642
NDST4	MIR4458	MIR4655
NDUFAF6	MIR4475	MIR4662A
NECAB1	MIR4476	MIR4665
NECTIN3	MIR4490	MIR4712
NEFL	MIR4506	MIR4715
NELL1	MIR4511	MIR4718
NEURL1	MIR452	MIR4722
NEUROD4	MIR4524A	MIR4726
NEUROG3	MIR4540	MIR4773-1
NFASC	MIR4640	MIR4777
NFIL3	MIR4645	MIR4778
NFKBIB	MIR4662A	MIR4783
NHIP	MIR4665	MIR4786
NHLH2	MIR4718	MIR4795
NKG7	MIR4761	MIR5100
NKX2-3	MIR4777	MIR548AA2
NMBR	MIR497	MIR548AE2
NOL4	MIR5004	MIR548D2
NOL9	MIR5093	MIR548X
NOMO3	MIR548F5	MIR549A
NOP56	MIR548N	MIR5584
NOSIP	MIR548V	MIR5587
NOVA1	MIR5584	MIR5589
NOX3	MIR5589	MIR602
NOX5	MIR5699	MIR6084
NPAS3	MIR584	MIR6089
NPEPL1	MIR591	MIR6090
NPFFR1	MIR6072	MIR635
NPHP4	MIR6090	MIR650
NPS	MIR613	MIR6510
NPY1R	MIR617	MIR6747
NR2E3	MIR645	MIR675
NRAD1	MIR6499	MIR6779
NRG4	MIR6717	MIR6791
NRP2	MIR6772	MIR6797
NSMAF	MIR6834	MIR6798
NTM	MIR6842	MIR6836
NTNG1	MIR6843	MIR6869
NTSR1	MIR6844	MIR6881
NUAK2	MIR6873	MIR6883
NUDT3	MIR6880	MIR6887
NUP188	MIR6891	MIR7157
NUP37	MIR6892	MIR744
NUP54	MIR7157	MIR766
NUP62	MIR8079	MIR7847
NUTM2E	MIR887	MIR7848
NXPH1	MIR888	MIR888
OBSL1	MIR890	MIR891A
ODAD3	MIR891A	MIR891B
OGFR	MIR891B	MLANA
OR10A2	MIR892A	MLIP
OR10C1	MITA1	MLLT6
OR10H2	MIURF	MLNR
OR11A1	MKI67	MLYCD
OR1L3	MKRN2	MMP1
OR2AG1	MLANA	MNAT1
OR2D3	MMP11	MPC1
OR2H1	MOB3B	MPPED1
OR5AK2	MPDZ	MPST
OR5C1	MRGPRX1	MR1
OR5K2	MRLN	MRGPRX1
OR6S1	MROH2A	MRLN
OR7E37P	MROH3P	MRM2
OR9G1	MROH5	MRPL18
OR9K2	MRPL17	MRPL23
OSBPL11	MRPL18	MRPL28
OSBPL6	MRPL32	MRPL4
OSR1	MRPS10	MRPL51
OTUD3	MS4A1	MRPS10
OTUD6B	MSANTD3	MRPS12
OVCA2	MSL3P1	MRPS22
OXTR	MSR1	MS4A10
PAK3	MSRB2	MSI2
PAK6	MSX1	MTA3
PARD3B	MTCL1	MTCL1
PARP3	MTCL3	MTFMT
PARPBP	MTFMT	MTMR10
PARVB	MTHFD2P1	MTMR7
PAX7	MTOR	MTRF1L
PBOV1	MTRF1L	MUC16
PCBP4	MTSS1	MUL1
PCCA	MTUS1	MVD
PCDH11X	MTUS1-DT	MYBPH
PCHILR	MUC13	MYCBP2
PCK1	MUC21	MYCT1
PCSK1	MUCL3	MYH1
PCSK6	MX1	MYL12A
PDCD11	MYBPH	MYO1F
PDCL	MYC	MYO5A
PDE11A	MYCT1	MYO7B
PDE3A	MYF5	MYOCD
PDE4A	MYLK	MYOG
PDHA1	MYLK4	MYOM1
PDHA2	MYLK-AS1	MYOM3
PDIA3	MYOG	MYOPARR
PDP1	MZB1	MYOZ2
PDZD2	N4BP2	NAA35
PELI2	NAA30	NAA40
PERP	NAA35	NBAS
PFDN6	NAALADL2	NBAT1
PFN1	NAALADL2-AS1	NBN
PGAP1	NAP1L5	NCAM1
PGLYRP2	NATD1	NCAPD2
PHC1	NAV1	NCCRP1
PHF1	NAV3	NCF4
PHYHD1	NBAS	NCL
PI16	NBN	NDC1
PIEZO1	NBR1	NDRG1
PIEZO2	NCAM1	NDST3
PIGZ	NCAPD3	NDUFA10
PIM1	NCK2	NDUFA11
PIN4	NCL	NDUFAF6
PIP4P2	NCOA3	NEB
PIRT	NCOR2	NECAB2
PKD2	NDRG2	NEIL2
PKDCC	NDST2	NEK1
PKN3	NDUFA4	NEU2
PLA2G2A	NDUFB1	NEURL1
PLAC9	NDUFB4	NFIA
PLCH1	NDUFB9	NFIA-AS1
PLD2	NDUFS4	NFIA-AS2
PLEK	NDUFS7	NFILZ
PLEKHG1	NDUFV2	NFKBIB
PLEKHG5	NEK3	NFKBID
PLEKHH2	NEPRO	NGEF
PLPPR2	NEU4	NHEJ1
PLXDC2	NEURL2	NHLRC4
PNKP	NFYC	NID1
PNO1	NGF	NIPAL4
PNPLA3	NHLRC3	NKAIN2
POC1A	NID1	NKRF
POGLUT1	NIPA1	NLGN1
POLR1H	NKX2-6	NLRP5
POLR1HASP	NLRP14	NME4
POLR2A	NME7	NMI
POM121L15P	NMUR1	NMUR1
PPA1	NNMT	NOL10
PPARG	NOL10	NOL11
PPFIA2	NOS1	NPAS3
PPFIA4	NOTCH4	NPHS1
PPIL1	NPAT	NR4A1
PPIL2	NPS	NRAP
PPIP5K1	NPSR1	NRIR
PPM1F	NPY	NRSN2
PPM1H	NPY1R	NRTN
PPM1K	NQO2	NSFL1C
PPP1R11	NR3C2	NSMCE2
PPP1R8	NR4A3	NTN5
PPP3R1	NR5A2	NUCB1
PRAG1	NRXN3	NUDT1
PRAMENP	NSG1	NUP210
PRANCR	NUMBL	OBP2B
PRDM11	NUS1	OCA2
PRDM12	NXPE2	OLFM1
PRKAG1	ODAD1	OLFM2
PRKAG2	OLFM1	OLFM5P
PRKCSH	OLFM2	OLFML3
PRKD2	OLFML3	OLIG3
PRKG1	OLIG3	ONECUT1
PRKG2	OOEP	OPTC
PRMT1	OPA1	OR10G2
PRMT3	OPRK1	OR2AE1
PRMT6	OPRM1	OR2Y1
PRODH	OPTN	OR2Z1
PRR12	OR10A2	OR4E1
PRR3	OR10AC1	OR52H1
PRR5L	OR2AG1	OR6B2
PRRG2	OR2D2	OSGIN1
PRSS50	OR5AU1	OSGIN2
PSAPL1	OR6A2	OTOS
PSAT1	OSGIN2	OTUB1
PSMB6	OTOP1	OTUB2
PSMD11	OTUB2	OXER1
PSMD7	OTUD7A	OXNAD1
PTCHD1-AS	OTULIN	P2RY11
PTEN	OTULINL	PABPC3
PTGIR	OXNAD1	PABPN1L
PTGR1	P2RY11	PAH
PTGR3	PAFAH1B2P2	PAK4
PTOV1	PAIP2	PAMR1
PTPRG	PALMD	PANCR
PTPRN	PALS2	PANK3
PTPRN2	PAPPA	PANX1
PTPRR	PARP14	PARD3B
PTTG1	PARP16	PARP3
PYROXD2	PARP9	PARVA
PZP	PASD1	PCBP4
QRFP	PAX5	PCDH10
QRSL1	PCCB	PCGF2
QTRT1	PCDH11X	PCGF6
R3HCC1L	PCIF1	PCNAP1
RAB38	PCM1	PCNX1
RAB3D	PCMTD1	PCSK5
RABGAP1	PCNAP1	PDCD11
RAD18	PCSEAT	PDCD7
RAD23B	PCSK6	PDE4A
RAE1	PCYT1B	PDE4D
RAG1	PDCD1	PDE6A
RAN	PDCD7	PDGFRL
RANBP2	PDE6A	PDIA2
RAPGEF3	PDGFRA	PDIA6
RAPGEF5	PDGFRL	PDZRN4
RARB	PDIA6	PER1
RASAL3	PDK3	PEX2
RASSF4	PDLIM3	PFAS
RASSF8	PDS5A	PFKFB3
RBFOX1	PDX1	PGAM5
RBM34	PDZD2	PGAP6
RBM38	PECAM1	PGPEP1L
RBM45	PEF1	PHACTR3
RC3H2	PELATON	PHF11
REELD1	PEX14	PHF14
RESF1	PEX5	PHLDB3
RESP18	PFDN6	PIEZO1
RETREG2	PFKL	PIEZO2
REV3L	PGGT1B	PIF1
RGCC	PGLYRP3	PIGQ
RGL2	PHB2	PIK3CB
RGL3	PHF1	PIMREG
RHBDL3	PHF14	PIN1
RHEBL1	PHF23	PINK1
RIMBP2	PHLDA3	PINLYP
RIMBP3C	PHLDB3	PIP4K2B
RIMKLB	PHYH	PISRT1
RING1	PIGF	PITPNC1
RINL	PIGY	PITPNM3
RIPPLY2	PIN1	PITX2
RNASE1	PINK1	PIWIL3
RNASE11	PINLYP	PJA1
RNASE12	PKD1L1	PKNOX2
RNASE2	PKP1	PKP2
RNASE6	PLA2G4C	PLA2G4A
RNASET2	PLAA	PLA2G4E
RND1	PLAU	PLAUR
RNF141	PLAUR	PLD4
RNF150	PLD5	PLD5
RNF166	PLEKHG7	PLEKHA2
RNF167	PLEKHO2	PLEKHA4
RNF186	PLGLA	PLEKHF2
RNF207	PLK3	PLEKHG6
RNF39	PLPBP	PLEKHO2
RNLS	PLPP2	PLK2
RNU6ATAC	PLPP6	PLK3
ROPN1	PLTP	PLRG1
ROPN1L	PLUT	PMIS2
RPA1	PNLDC1	PML
RPA2	POLQ	PMP2
RPAP3	POLR1H	PNLDC1
RPL22	POLR2C	PNMA8A
RPL29	POLR2E	PNPLA1
RPL29P2	POLRMT	POLE
RPL32	POU5F1	POLR1C
RPP21	POU5F1B	POM121L10P
RPS10-NUDT3	PPAN	POM121L1P
RPS14P3	PPARG	POU1F1
RPS18	PPARGC1B	POU2AF1
RPS4X	PPFIA4	PPAN
RPS6KA2	PPP1R11	PPARGC1B
RPUSD4	PPP1R14D	PPEF1
RRAS	PPP4R4	PPFIA4
RRP8	PRDM1	PPIAP46
RRP9	PRDM7	PPP1R15A
RSPH1	PRIMA1	PPP4R4
RTKN2	PRKCA	PPP5C
RTL4	PROB1	PRADX
RTN4IP1	PROSER1	PRAM1
RTN4RL1	PRPS1L1	PRAME
RTP3	PRPS2	PRDM16
RUNDC3B	PRR29	PRDM2
RUNX1	PRR5L	PRELP
RXRA	PRR9	PRIMPOL
RXRB	PRRG3	PRKAG2
RYR1	PRSS35	PRKAR1A
RYR3	PRSS57	PRKCE
S1PR5	PRUNE2	PRKCQ
SAMM50	PSMA2	PRKG1
SAR1A	PSMB8	PRL
SARAF	PSMD1	PROC
SARS2	PSMD8	PRODH2
SAT2	PSORS1C1	PROX1
SBF2	PSORS1C3	PRPF19
SCAF1	PTCH1	PRPF8
SCARB1	PTCH2	PRPS2
SCARB2	PTF1A	PRR15
SCARNA1	PTGES3L	PRR18
SCARNA18	PTK2B	PRR23A
SCARNA21	PTMA	PRR33
SCFD2	PTP4A2	PRR35
SCHIP1	PTP4A3	PRTFDC1
SCHLAP1	PTPN1	PSD3
SCNN1G	PTPN22	PSENEN
SDC2	PTPN5	PSMB3
SDCBP	PTPN6	PSMB8
SDF2L1	PTPRE	PSMD1
SDK2	PTPRG	PSMF1
SELENOS	PTPRQ	PSMG3
SEMA3A	PTPRT	PTCH1
SENP3	PUS7L	PTCH2
SENP5	PWP2	PTCSC1
SERAC1	PWWP3A	PTGDR2
SERF2	PXDNL	PTH2R
SERINC4	PYURF	PTPN22
SET	RAB11A	PTPN5
SFTPD	RAB2B	PTPRN
SGCD	RAB4B	PVALB
SGCG	RABIF	PXMP2
SGCZ	RABL3	PXT1
SH3BP4	RAD50	RAB11FIP3
SH3GLB2	RAD51	RAB12
SH3PXD2A	RAD51B	RAB3C
SH3RF3	RAF1	RAB8B
SHBG	RAG1	RABAC1
SHISA9	RANBP6	RABIF
SHISAL1	RAPGEF4	RAD21L1
SHOC1	RASGRF2	RAD54L2
SHROOM3	RASGRP4	RALGDS
SIGLEC10	RASL12	RAMACL
SIGLEC11	RBFOX1	RAN
SIGLEC12	RBM7	RANBP3
SIGLEC7	RBP5	RANBP6
SIMALR	RCL1	RANGRF
SIPA1L2	RDH11	RARS1
SIRT2	RDH8	RASGEF1A
SLC10A7	REXO2	RASGRF2
SLC12A2	RFLNA	RASIP1
SLC12A8	RFPL2	RASL12
SLC1A5	RFTN1	RASSF3
SLC22A15	RGL2	RAVER1
SLC24A2	RGPD3	RBCK1
SLC25A1	RGS12	RBM24
SLC25A11	RGS17	RBM42
SLC25A15	RGS4	RBM43
SLC25A3	RHOH	RCBTB1
SLC35F3	RHOQ	RCOR2
SLC37A1	RHOV	RDH8
SLC39A7	RIC1	RESP18
SLC44A2	RIC3	RET
SLC48A1	RIMS3	RETREG2
SLC52A1	RIN2	REXO4
SLC6A14	RIN3	RFK
SLC9A7P1	RING1	RFTN1
SLCO1A2	RIPK1	RFX2
SLCO4A1	RIPOR3	RGS11
SLIT2	RIPPLY2	RGS12
SLIT3	RMDN3	RGS17
SLU7	RMST	RIC1
SMG6	RN7SL832P	RIF1
SMIM2	RNASE7	RILP
SMIM21	RNASEH1	RIMBP2
SMIM29	RNASEH2B	RIN3
SMIM2-IT1	RNASEK	RINL
SMIM40	RND2	RMDN2
SMPDL3B	RNF125	RN7SL832P
SMU1	RNF126	RNF112
SMYD4	RNF138	RNF125
SNAI3	RNF139	RNF144A
SNAR-E	RNF150	RNF150
SND1	RNF220	RNF166
SNORA14B	RNF39	RNF17
SNORA48	RNFT2	RNF207
SNORA51	RNGTT	RNF212
SNORA53	RNPEPL1	RNF220
SNORA67	RNU2-1	RNF227
SNORA7A	RNU5D-1	RNF32-DT
SNORD10	RNU7-1	RNF5P1
SNORD110	ROCK2	RNFT2
SNORD32B	ROPN1B	RNLS
SNORD90	ROS1	RNU5D-1
SNRPA1	RPGRIP1	ROS1
SNRPB	RPL13AP20	RPA1
SNUPN	RPL13P5	RPL18
SNX33	RPL23P8	RPL22
SNX4	RPL27	RPL23
SNX9	RPL37A	RPL29
SORCS2	RPL39L	RPL38
SORCS3	RPS10P7	RPL7A
SOST	RPS15	RPS19
SOX15	RPS18	RPS4Y1
SPAG7	RPS19BP1	RPS6KA2
SPATA16	RPS6KA1	RPS6KC1
SPC24	RPS7	RPS8
SPEG	RPS8	RPSAP9
SPESP1	RRAGB	RRAS2
SPO11	RRP8	RRP9
SPOUT1	RSBN1	RS1
SPP1	RSL1D1	RSAD2
SPTAN1	RTCB	RSBN1
SRP14	RTL10	RTN3
SRPRA	RTP1	RTN4RL1
SSPN	RTP5	RUVBL2
SSUH2	RTTN	S1PR2
ST3GAL6	RUNDC1	S1PR5
ST6GALNAC5	RWDD4	SARS2
STBD1	RXRB	SASH1
STEAP1B	RYR1	SCARF1
STK16	RYR2	SCARNA10
STRC	S100A4	SCARNA14
STRIT1	SALL2	SCEL
STRN4	SAMD3	SCGB1A1
STX12	SARDH	SCGB3A1
STX16	SASS6	SCIN
STX2	SBNO2	SCN1A
SUGT1P3	SCARA3	SCN1B
SUPV3L1	SCARNA12	SCN8A
SV2B	SCARNA13	SCN9A
SV2C	SCCPDH	SCNN1A
SVIP	SCD5	SCUBE1
SWSAP1	SCML4	SCUBE1-AS2
SYN2	SCN4A	SDCBP2
SYNGAP1	SEC24C	SDK2
SYNJ2	SEC63	SEC1P
TACR2	SELENOK	SEC22C
TAF10	SEMA5A	SEC24D
TAPBP	SEMA5A-AS1	SEL1L
TAS1R2	SEPHS1	SEMA4C
TBC1D13	SEPTIN5	SEMA6D
TBC1D17	SERP2	SEMA7A
TBC1D9	SERPINA4	SENCR
TBCCD1	SERPINB9	SEPTIN6
TCFL5	SFTA2	SERPINA10
TDGF1P3	SH2D5	SERPINA4
TDRD3	SH3BGRL3	SERPINA6
TDRG1	SH3TC2	SERPINF1
TEKT5	SHC2	SETDB2
TENM2	SHFL	SFT2D1
TENM4	SIK3	SFT2D3
TERF2IP	SIL1	SH2D3A
TESPA1	SLC12A8	SH2D5
TEX47	SLC15A1	SH2D7
TFB1M	SLC15A2	SH3GL2
TFF1	SLC16A11	SH3PXD2A
TGM3	SLC16A9	SHFL
THBS1	SLC1A1	SIK1
THBS2	SLC22A4	SIK2
THEMIS2	SLC23A1	SIRPB2
THSD4	SLC24A1	SIRT2
THSD7B	SLC24A3	SIVA1
TIAM2	SLC24A4	SLA
TIGD4	SLC25A13	SLAMF1
TIMMDC1	SLC25A18	SLC10A5
TIMP4	SLC25A37	SLC13A5
TIRAP	SLC26A2	SLC15A1
TKTL2	SLC26A3	SLC15A3
TM4SF5	SLC28A3	SLC16A6
TMA16	SLC2A11	SLC16A9
TMC2	SLC31A1	SLC1A2
TMCC2	SLC35A3	SLC23A3
TMCO4	SLC35F4	SLC24A4
TMEM106C	SLC36A1	SLC25A18
TMEM132D	SLC39A2	SLC25A26
TMEM154	SLC39A7	SLC25A35
TMEM167A	SLC41A3	SLC25A3P1
TMEM170A	SLC45A4	SLC25A42
TMEM183A	SLC46A2	SLC25A5
TMEM198	SLC49A4	SLC26A1
TMEM200C	SLC51B	SLC26A2
TMEM205	SLC5A1	SLC27A2
TMEM215	SLC5A4	SLC28A3
TMEM220-AS1	SLC66A3	SLC2A6
TMEM231	SLC6A6	SLC31A2
TMEM238L	SLC7A2	SLC37A2
TMEM254	SLC8A1	SLC38A6
TMEM39A	SLC8A3	SLC38A8
TMEM44	SLITRK2	SLC43A2
TMEM67	SLTM	SLC46A2
TMEM72	SMARCA2	SLC47A1
TMEM88	SMARCAL1	SLC51B
TMIE	SMARCB1	SLC7A2
TMPO	SMARCC1	SLC8A1
TMPRSS11E	SMG9	SLC8A3
TMPRSS3	SMIM2	SLIT3
TMTC4	SMIM23	SLITRK2
TNFRSF25	SMIM33	SLK
TNFSF12	SMIM40	SMARCA2
TOMM20	SMYD3	SMG9
TOP3B	SNAP91	SMIM31
TOX	SNHG10	SMYD3
TP53	SNHG18	SMYD4
TP53BP1	SNHG25	SNAI3
TP53I11	SNHG4	SNAR-G2
TP53INP1	SNN	SNORA10B
TP53TG1	SNORA119	SNORA114
TPP1	SNORA20	SNORA120
TPTE2P5	SNORA50C	SNORA20
TRAF3IP2	SNORA74A	SNORA21
TRAF6	SNORA75	SNORA29
TRAPPC12	SNORD104	SNORA38B
TRDN	SNORD105	SNORA59B
TRIM31	SNORD123	SNORA75
TRIM39	SNORD137	SNORA93
TRIM45	SNORD13E	SNORA99
TRPM3	SNORD141B	SNORC
TSG1	SNORD145	SNORD105
TSHZ1	SNORD146	SNORD118
TSKS	SNORD151	SNORD12
TSNAX	SNORD153	SNORD131
TSPAN11	SNORD160	SNORD145
TSPAN15	SNORD162	SNORD164
TSPAN16	SNORD170	SNORD20
TSPAN18	SNORD173	SNORD24
TSSK2	SNORD20	SNORD38A
TTF2	SNORD38A	SNORD55
TUBA1B	SNORD8	SNORD82
TUBA4A	SNORD82	SNPH
TYSND1	SNORD9	SNRPD3
UBASH3A	SNRPA	SNX13
UBD	SNX13	SNX29
UBE2E3	SNX18	SNX30
UBE2L3	SNX21	SNX8
UBE2Q2	SNX29	SOD2
UBXN2B	SNX30	SOWAHD
UFD1	SOBP	SOX1
UFL1	SOCS5	SOX12
UGT2B15	SOCS6	SOX1-OT
UMODL1	SOD2	SOX30
UMPS	SOGA3-KIAA0408	SP100
UNC5C	SOHLH2	SPACA1
UPK1B	SORBS2	SPACA4
UQCRFS1	SORCS2	SPACA7
USP31	SOX2	SPANXN4
VANGL1	SP4	SPATA13
VAPB	SP8	SPATA4
VDR	SPACA7	SPECC1L
VMO1	SPARC	ADORA2A
VPREB1	SPATA13	SPG21
VPS52	SPATA24	SPHK2
VSIG10L	SPATA25	SPINDOC
VSIG10L2	SPATA3	SPMAP1
VSIG10L-AS1	SPATA31D1	SPOCK1
VTA1	SPATA3-AS1	SPON1
VTCN1	SPATA41	SPON2
WASHC3	SPATA6L	SPP2
WBP4	SPG21	SPRING1
WBSCR23	SPINT1	SPTBN5
WDR27	SPINT2	SQLE
WDR46	SPINT4	SRBD1
WDR5	SPIRE2	SRCIN1
WDR70	SPMAP2	SRGAP1
WDR76	SPOCD1	SRRM5
WIZ	SPOCK1	SRY
WNT1	SPRED3	SSBP2
WNT7B	SPSB2	SSTR5
WRAP53	SPTLC3	STARD13
WSCD1	SRRM5	STAU1
WWC1	SSBP2	STEAP1
WWOX	ST18	STEEP1
XKR8	ST6GAL1	STK16
XRCC4	ST6GAL2	STK24
YDJC	STAG1	STKLD1
YPEL1	STARD13	STMND1
ZBTB14	STING1	STN1
ZBTB20	STK11	STON2
ZBTB22	STK24	STPG1
ZBTB6	STK31	STRA6
ZBTB9	STK33	STX2
ZC3H18	STK39	STX6
ZDHHC12	STMN2	SUGP2
ZER1	STOML3	SULF1
ZFAND2B	STOX2	SULF2
ZFHX3	STX17	SULT2B1
ZFP3	STX18	SULT4A1
ZFP57	STX18-AS1	SURF1
ZFPM1	STX18-IT1	SYCN
ZIC3	STXBP5-AS1	SYCP2
ZMYND15	SULF2	SYK
ZNF148	SUPT16H	SYNE1
ZNF207	SUPT20HL1	SYNGR4
ZNF215	SYK	SYNJ2BP
ZNF22	SYNE1	SYNM
ZNF232	SYNE3	SYNPO2
ZNF343	SYNGAP1	SYT17
ZNF365	SYNGR4	SYT6
ZNF407	SYNJ2BP	SYT8
ZNF469	SYT6	TACC1
ZNF483	TACR3	TAF5
ZNF516	TADA2B	TAF8
ZNF653	TAF10	TAMALIN
ZNF804B	TAF8	TAP1
ZNRD1ASP	TANGO2	TAPBPL
ZP4	TAP1	TBC1D20
	TAPBP	TBC1D2B
	TARS3	TBC1D31
	TAS2R39	TBK1
	TAS2R41	TCL1A
	TASP1	TCP1
	TATDN1	TEAD1
	TBC1D14	TENM2
	TBX1	TEX101
	TBX3	TEX264
	TC2N	TFAMP1
	TCF19	TFAP2B
	TCF25	TG
	TCL1B	TGIF1
	TCP1	THBS1
	TEK	THNSL1
	TENM3	THRB
	TESC	THSD7A
	TEX10	THUMPD2
	TEX101	TIGD6
	TEX2	TINAG
	TEX44	TIPIN
	TFAP2B	TLCD2
	TFB2M	TLR7
	TH2LCRR	TMC7
	THEMIS	TMDD1
	THUMPD2	TMED11P
	THYN1	TMEM107
	TIGD6	TMEM108
	TIMM10B	TMEM109
	TINAGL1	TMEM132C
	TKTL2	TMEM143
	TLE1	TMEM147
	TLR7	TMEM161A
	TM2D3	TMEM175
	TMA16	TMEM178A
	TMEFF1	TMEM183A
	TMEM106A	TMEM184A
	TMEM11	TMEM218
	TMEM117	TMEM225B
	TMEM11-DT	TMEM247
	TMEM128	TMEM44
	TMEM139	TMEM53
	TMEM143	TMEM65
	TMEM14A	TMEM74B
	TMEM14EP	TMEM86A
	TMEM150C	TMPRSS5
	TMEM178A	TMPRSS6
	TMEM183A	TMSB4X
	TMEM200A	TNFAIP6
	TMEM247	TNFRSF1A
	TMEM253	TNFSF9
	TMEM272	TNNI2
	TMEM53	TOP1P1
	TMEM86A	TPM3P9
	TMEM9	TPSAB1
	TMPRSS11E	TPTE2P1
	TMPRSS2	TRAK1
	TMSB4X	TRAPPC1
	TNFSF18	TRAPPC2L
	TNNC2	TRERF1
	TNNI1	TRIB3
	TNNI3K	TRIL
	TNNT2	TRIM22
	TNS3	TRIM4
	TOP1P1	TRIM5
	TOX4	TRIML1
	TPGS1	TRIP10
	TPI1	TRMT5
	TPK1	TRPM1
	TPP1	TRPS1
	TPPP2	TSR3
	TRAF6	TST
	TRAM2	TTC12
	TRAPPC10	TTC21B
	TRAPPC11	TTC23
	TRAPPC12	TTC9
	TRAPPC8	TTYH2
	TRDN	TUBA4A
	TRERF1	TUBB4A
	TRIM3	TUBBP5
	TRIM31	TULP2
	TRIM32	TUNAR
	TRIM36	TUT1
	TRIM40	TUT7
	TRIO	TXNDC17
	TRIP11	TYK2
	TRPM2	TYROBP
	TRPM3	U2AF1
	TRPM8	U2AF1L4
	TRPS1	UBAP1L
	TSBP1	UBE2A
	TSC22D1	UBE2CP5
	TSEN2	UBE2I
	TTC12	UBE2L5
	TUBB3	UBL5
	TUBGCP3	UBQLN3
	TUBGCP5	ULK2
	TUSC3	UNKL
	TUSC8	UPB1
	TUT7	UPF1
	TWF1	UPK1A
	TXNDC11	USP17L2
	TXNRD2	USP28
	TYMS	USP29
	TYRP1	USP3
	UBAP1L	USPL1
	UBE2C	VAMP1
	UBE2Q2P13	VAMP2
	UBIAD1	VAV1
	UBL5	VGLL2
	UBXN11	VIP
	UCMA	VIPR1
	UFSP2	VMAC
	UGT1A6	VN1R2
	UGT2A1	VN2R19P
	UGT2A3	VPS37A
	UGT2B15	VPS37C
	URAD	VWA5B1
	URAHP	VWF
	USP40	WASHC5
	USP5	WDR17
	USP51	WDR33
	UTP14C	WDR81
	UXS1	WIPI1
	VAMP9P	WTAP
	VARS2	WTAPP1
	VAT1	WWC1
	VAV2	WWOX
	VCL	XGY2
	VIP	XPNPEP1
	VPS13A	XPOT
	VPS13A-AS1	XPR1
	VPS18	XRCC1
	VPS26B	XYLT1
	VPS52	YARS2
	VPS9D1	YPEL5
	VTI1B	YTHDC2
	WDFY2	ZBED1
	WDR46	ZBED5
	WDR5B-DT	ZBTB16
	WDR70	ZBTB32
	WFDC10A	ZBTB42
	WRNIP1	ZC3H18
	WSCD1	ZCCHC3
	WTAP	ZCCHC9
	WWC2	ZDHHC2
	XAGE-4	ZFAND2B
	XPNPEP1	ZFAS1
	XRCC1	ZFAT
	XRCC5	ZFHX3
	YIF1B	ZFP37
	ZBTB16	ZFP62
	ZBTB22	ZFTA
	ZBTB41	ZGLP1
	ZBTB49	ZHX2
	ZBTB9	ZIM3
	ZC3H7A	ZMAT4
	ZCCHC7	ZNF134
	ZCCHC9	ZNF18
	ZFP37	ZNF211
	ZFYVE19	ZNF256
	ZFYVE26	ZNF26
	ZMYND11	ZNF264
	ZNF114	ZNF280A
	ZNF141	ZNF30
	ZNF214	ZNF330
	ZNF219	ZNF331
	ZNF276	ZNF347
	ZNF322	ZNF414
	ZNF326	ZNF415
	ZNF330	ZNF418
	ZNF335	ZNF428
	ZNF423	ZNF444
	ZNF428	ZNF460
	ZNF595	ZNF525
	ZNF664-RFLNA	ZNF530
	ZNF683	ZNF542P
	ZNF703	ZNF551
	ZNF718	ZNF558
	ZNF883	ZNF572
	ZPLD2P	ZNF575
	ZPR1	ZNF582
	ZSWIM1	ZNF586
	ZSWIM8	ZNF605
	ZSWIM9	ZNF606
	ZYX	ZNF655
		ZNF665
		ZNF671
		ZNF677
		ZNF705D
		ZNF761
		ZNF776
		ZNF787
		ZNF792
		ZNF805
		ZNF813
		ZNF814
		ZNF818P
		ZNF831
		ZNF84
		ZNF845
		ZNF883
		ZNFX1
		ZP1
		ZSCAN25
		ZSCAN4
		ZSCAN5A
		ZSCAN5B
		ZW10
never vs ever infected	https://maayanlab.cloud/Enrichr/enrich?dataset=0ac24d4c8fce77bcd8d950b4f24f9812
cleared vs chronic	https://maayanlab.cloud/Enrichr/enrich?dataset=87f325200837cd9bd8d495a17fcd0b70
cleared vs partially/fully chronic	https://maayanlab.cloud/Enrichr/enrich?dataset=2313c6f1b5246db8fcfb2394a92f0de2
ALL 3 (4272 genes)	https://maayanlab.cloud/Enrichr/enrich?dataset=ab103c0201a61e5f48b974db5cd93648

## Sheet: Supplementary table 9
Term	Overlap	P-value	Adjusted P-value	Odds Ratio	Combined Score	Genes
PMC5189935-pmed.1002201.s013.xlsx-HR-HER2- Amplification-19P13 2 ERBB2	29/65	2.01051e-16	6.67892e-13	10.3154624499846	372.831466096995	DOCK6;KANK2;SWSAP1;ODAD3;PLPPR2;PRKCSH;SLC44A2;RAB3D;KEAP1;KRI1;ELAVL3;TMEM205;PDE4A;S1PR5;LDLR;AP1M2;CDKN2D;CCDC159;EPOR;DNM2;QTRT1;TSPAN16;ILF3;CDC37;ANGPTL8;RGL3;ZNF653;SPC24;ATG4D
PMC5189935-pmed.1002201.s013.xlsx-HR HER2- Deletion-19P13 2 ERBB2	29/74	1.30801e-14	2.17261e-11	8.24835333948907	263.680735280608	DOCK6;KANK2;SWSAP1;ODAD3;PLPPR2;PRKCSH;SLC44A2;RAB3D;KEAP1;KRI1;ELAVL3;TMEM205;PDE4A;S1PR5;LDLR;AP1M2;CDKN2D;CCDC159;EPOR;DNM2;QTRT1;TSPAN16;ILF3;CDC37;ANGPTL8;RGL3;ZNF653;SPC24;ATG4D
Paraxanthine Levels In Elite Athletes	5/6	1.21293e-05	0.0287235	63.0994550408719	714.278734540217	CYP2A6;CAMK1D;NOX5;BMPR1B;ABCG2
COVID-19 (Hospitalized Vs Not Hospitalized)	17/74	2.04875e-05	0.0287235	3.78337671100829	40.8441860839832	HPSE2;VDR;LINC01250;SFTPD;ACTN4;KALRN;SGCZ;TIAM2;NFASC;ADGRB3;SSPN;PIEZO1;DMD;MALRD1;CTNNA2;ATP13A3;LINC00378
PMC5189935-pmed.1002201.s013.xlsx-HR-HER2- Deletion-5Q33 3 ERBB2	9/24	2.94585e-05	0.0326204	7.58688524590164	79.15039214051	FAM200C;TENM2;C1QTNF2;PTTG1;FABP6;WWC1;ATP10B;SLU7;CCNJL
RNA Nuclease Activity (GO:0004540)	16/70	3.8059e-05	0.0253473	3.7566791224993	38.2293640046518	TSNAX;ENDOG;RNASE11;RNASET2;RNASE6;RNASE12;RNASE2;RNASE1;SND1;SMG6;ENDOU;PPP1R8;ANG;DCPS;EXOSC2;ANKZF1
Conjunctival UV Autofluorescence (CUVAF)	4/5	0.000137943	0.0773583	50.4452008168822	448.390806763539	LINC02354;FKRP;SLC1A5;HDAC7
Diamine Acetyltransferase 2 Levels	4/5	0.000137943	0.0773583	50.4452008168822	448.390806763539	FXR2;TNFSF12;SAT2;SHBG
N6-acetyllysine Levels	4/5	0.000137943	0.0773583	50.4452008168822	448.390806763539	SOX15;SAT2;SHBG;MPDU1
PMC5189935-pmed.1002201.s013.xlsx-HR-HER2- Amplification-19Q13 2 ERBB2	13/55	0.000138855	0.115319	3.9188682322244	34.8076918457415	RYR1;MAP4K1;MRPS12;ECH1;ACTN4;SIRT2;LGALS4;HNRNPL;RINL;SARS2;CAPN12;EIF3K;NFKBIB
Inflammatory Skin Disease	12/49	0.000173621	0.0811389	4.10455630168156	35.5398592592302	QTRT1;GRM4;PTPRN2;REV3L;ELMO1;PDE4A;LINC02429;PRR5L;SLIT3;TGM3;R3HCC1L;MFSD4B
PMC9528698-NIHMS1835045-supplement-Supp Table 54.xlsx-TTN control-Gene TTN	43/330	0.000188111	0.124981	1.91106454521089	16.3940274286746	DGKG;PLEKHH2;ABCD3;FOXO3;PKD2;BICD1;GLI3;FOXO1;PTPRG;PDZD2;SH3PXD2A;TP53INP1;MAPK1;LRRC8A;SHOC1;ANKS1B;KIRREL3;CARMIL1;GABBR1;PLEKHG1;NBPF3;OSBPL6;HEG1;ANKRD44;ITGA1;ANK2;PLXDC2;SORCS2;CORO2B;HS3ST4;HS3ST2;SH3RF3;NDUFAF6;YPEL1;ELMO1;RARB;RGL3;PLCH1;PI16;RBM45;DOCK1;CDC42SE2;ABCG2
Hematopoietic Stem Cell Differentiation (GO:0060218)	5/9	0.000210922	0.746242	15.7723092643052	133.49717731469	LMBR1L;UFL1;MLLT3;MEOX1;TP53
NTRK3 human kinase ARCHS4 coexpression	39/299	0.000358386	0.178476	1.91077405857741	15.1598907195469	SLC24A2;CCDC122;TENM4;NTM;DIRAS2;CHD5;KALRN;NUDT3;RYR3;ELAVL3;SV2C;SV2B;FUT9;LRRTM4;CLVS2;DLGAP1;CTNNA2;PAK3;ANKS1B;ZNF365;PPFIA2;RBFOX1;ZNF483;GABBR1;DTNA;MAGI2;ANK2;ATP1B2;SHISA9;SYN2;CORO2B;NFASC;ADGRB3;MAP1A;KCNQ3;RAPGEF5;FGF13;CAPS2;CDK5R1
TRAIL Levels	9/32	0.00036911	0.123447	4.94583036350677	39.0939048984177	SPATA16;DTNA;NCEH1;KIF26B;NPY1R;CROT;PCSK6;ECT2;NOL4
Myeloid Cell Surface Antigen CD33 Levels	4/6	0.000389572	0.123447	25.2212389380531	197.998348874066	IGLON5;VSIG10L;LINC01872;CD33
F-sweet Food Liking (Derived Food-Liking Factor)	5/10	0.000396228	0.123447	12.6171662125341	98.8368270187541	LINC01414;RARB;TRIM31;EIF4G3;CCDC171
Migraine And/Or Systolic Blood Pressure	6/15	0.00044249	0.124074	8.4153601454215	64.9926107980793	CFDP1;HPSE2;ITGB5;FHL5;HIC1;SMG6
Developmental biology	50/420	0.000529364	0.544612	1.72427874114452	13.0076732509241	NRP2;AP2A1;PCSK6;ARHGAP35;RND1;MED11;RPS6KA2;SPTAN1;CDON;MYOG;ITGA1;UNC5C;ANK2;DNM2;NCOR2;MED25;CACNB3;COL2A1;KCNQ3;DCX;PPARG;IAPP;PFN1;DOCK1;ITGA9;SEMA3A;FOXO3;FOXO1;SDCBP;RXRA;RRAS;AP2S1;ABL1;PAK6;MAPK1;FYN;SLIT3;CTNNA2;SLIT2;PCK1;PAK3;WNT1;KLF4;NFASC;DLG1;COL5A1;GDNF;COL9A3;CDK5R1;NEUROG3
PMC4348661-srep08748-s1.pdf-183-PKDCC PKDCC	7/21	0.000536725	0.297167	6.31412005457026	47.5454800081328	ELK4;NCEH1;UBE2Q2;MDM4;CSPG4;TMCC2;LRPPRC
Sphingomyelin Levels	12/55	0.000547334	0.13952	3.53068143832673	26.5170126220971	DOCK6;SCARB1;GLTPD2;ABCG5;C17ORF107;GPAM;CHRNE;MINK1;CAMTA2;TMPRSS11E;CD300LG;KLRG1
G20210JR	18/105	0.000624115	0.142298	2.62211162460007	19.3490217144198	MAP10;SCARB2;SLC44A2;SLC6A14;PZP;M6PR;BUB1B;ATP1B2;VTCN1;PLXDC2;THBS1;NFASC;GNPTAB;EPB41L3;ADORA1;ST3GAL6;MFGE8;LTF
Histone Methyltransferase Binding (GO:1990226)	5/11	0.000682392	0.227237	10.5137375113533	76.6441537396645	NOP56;PHF1;WIZ;PRDM12;RESF1
Major Depressive Disorder X Sex Interaction	5/11	0.000682392	0.154401	10.5137375113533	76.6441537396645	CAST;WWOX;SNX4;EIPR1;MFGE8
Smoking Status	19/115	0.000715841	0.154401	2.50880473406694	18.1688946731574	NECAB1;ZFHX3;TENM2;PTPRN2;THSD7B;BDNF;NTM;LINC02790;CHD3;SORCS3;IQCJ;SMG6;LINC02607;REV3L;TERF2IP;GALNTL6;TOX;MFSD4B;ANKS1B
PMC9528698-NIHMS1835045-supplement-Supp Table 27 9.xlsx-TTN control-Gene TTN	31/229	0.000740997	0.351656	1.99007761386402	14.3435134310687	DGKG;ANKRD33B;THSD7B;PTEN;FOXO3;KALRN;FOXO1;PTPRG;HIRA;RASSF4;MAN1A1;SHOC1;ARGLU1;CARMIL1;WWOX;ZFHX3;DTNA;ANK2;LHFPL1;PLXDC2;PARD3B;MYO1D;ELF1;NFASC;KCNQ3;YPEL1;PYROXD2;CCDC3;RAPGEF5;AHDC1;CCDC171
PMC6037329 F2	4/7	0.000855859	0.772861	16.8132516451101	118.758812608097	ABCG5;LDLR;CYP7A1;ABCG1
Whole Brain Restricted Isotropic Diffusion (Multivariate Analysis)	28/202	0.000902288	0.180646	2.04384520542497	14.3285346959017	PKDCC;ITGB5;PRKAG2;FNBP1L;IQGAP2;FOXO3;SMG6;PDZD2;DRAM1;POLR2A;LINC01968;DISC1;SLC12A8;WWOX;PLEKHG1;COL26A1;ANGPT2;ACTN4;AMPD3;KIF6;BMP4;PCCA;SLCO1A2;OR11A1;NBL1;LINC01411;ABCG2;MCPH1
Axon guidance	40/325	0.00096906	0.544612	1.78665785188722	12.3979476872466	NRP2;SEMA3A;AP2A1;ARHGAP35;RND1;EFNB2;SDCBP;PPP3R1;EFNB3;RRAS;RPS6KA2;AP2S1;ABL1;PAK6;MAPK1;FYN;SLIT3;SLIT2;PAK3;SPTAN1;EPHA5;NTNG1;EPHA7;ITGA1;ANK2;UNC5C;DNM2;CACNB3;DLG1;NFASC;COL2A1;COL5A1;GDNF;KCNQ3;DCX;COL9A3;PFN1;DOCK1;CDK5R1;ITGA9
Risk-taking Tendency (4-Domain Principal Component Model)	13/67	0.00106323	0.180646	3.04602993404363	20.854487170063	TENM2;ZFHX3;PTPRN2;THSD7B;BDNF;UBE2E3;CADPS;PCCA;TRIM39;LRRTM4;REV3L;TOX;MFSD4B
Smoking Status (Ever Vs Never Smokers)	20/128	0.00108264	0.180646	2.3475057989855	16.0295877433556	ZFHX3;TENM2;THSD7B;BDNF;NTM;LINC02790;ZBTB20;FOXO3;LRPPRC;PTPRG;SMG6;PCCA;ZNF407;REV3L;RARB;TERF2IP;GALNTL6;TOX;MFSD4B;CNTNAP4
Aerodigestive Squamous Cell Cancer (Pleiotropy)	18/110	0.00109522	0.180646	2.47893321380547	16.8983978215912	PDIA3;CARMIL1;RBFOX1;ZFHX3;HELQ;PTPRN2;CATSPER2;XRCC4;PCSK6;GNL1;THSD4;NPAS3;CYP2A6;NDUFAF6;LNX1;OR11A1;POLR1H;TP53
Monoatomic Ion Channel Activity (GO:0005216)	9/37	0.00117209	0.260204	4.06154859484777	27.4112624218893	SCNN1G;ASIC4;CALHM2;CHRNA7;PIEZO2;PIEZO1;LRRC8A;PKD2;TRPM3
TNIK human kinase ARCHS4 coexpression	37/299	0.00133409	0.332188	1.79624540177337	11.8902570016474	GABRB3;SCARB2;RABGAP1;CHD3;FNBP1L;SIPA1L2;KALRN;ARHGAP35;PTPRG;NPAS3;HK1;ELAVL3;EFNB2;FUT9;EPB41L3;FYN;CTNNA2;SPTAN1;CDON;PPFIA2;MAGI1;RBFOX1;GABBR1;DTNA;WSCD1;ANK2;SORCS3;CORO2B;CLIP2;NFASC;CFDP1;ADGRB3;NOVA1;KIF26B;KCNQ3;MRAP2;CDK5R1
PMC7259759-pone.0233978.s007.xlsx-507 genes-AAK1 AAK1	56/505	0.00140954	0.534509	1.59119064870888	10.4453619847215	DOCK5;CPQ;PCDH11X;PRKAG2;LDLRAD3;FARS2;PTPRG;GPR176;PIEZO2;REV3L;DLGAP1;RNF150;SBF2;PRKG1;MAGI1;EPHA5;KIRREL3;EPHA7;EIPR1;MAGI2;ITGA1;UNC5C;SND1;RUNX1;TRDN;RTN4RL1;ADGRB3;ELMO1;RARB;DSCAML1;DOCK1;SEMA3A;NTM;MLLT3;KALRN;NOL4;THSD4;NPAS3;FSTL5;RXRA;SCFD2;DMD;CTNNA2;DISC1;TMEM132D;COL26A1;ZFHX3;PTPRN2;RNLS;PLXDC2;SGCZ;NELL1;ARHGAP31;DIAPH2;NOVA1;PLCH1
PMC10291819-13287 2023 3380 MOESM10 ESM.pdf-2-CAMK2A CAMK2A	8/31	0.0014481	0.534509	4.39329277340852	28.7211738278949	LINGO2;TMEM88;EPB41L3;CADPS;IQGAP2;S1PR5;SGCG;ST6GALNAC5
Skeletal muscle sarcoglycan complex SGC, beta-gamma-delta-zeta (mouse)	3/4	0.00150702	0.27172	37.8081632653061	245.663044212682	SGCD;SGCZ;SGCG
BDP1	3/4	0.00150702	0.0467177	37.8081632653061	245.663044212682	ABL1;FYN;ARHGAP35
Serum Iron Levels	4/8	0.00161191	0.235276	12.6092579986385	81.0817900442542	SLC24A2;NELL1;UNC5C;SHISA9
Chitinase-3-like Protein 1 Levels	4/8	0.00161191	0.235276	12.6092579986385	81.0817900442542	CHIT1;ADORA1;PPFIA4;LINC02898
PMC6761106 F2	4/8	0.00161191	0.772861	12.6092579986385	81.0817900442542	MOG;TRAF6;UBD;ABCF1
Sema4D Mediated Inhibition Of Cell Attachment And Migration R-HSA-416550	4/8	0.00161191	0.631801	12.6092579986385	81.0817900442542	RRAS;RNASE1;ARHGAP35;RND1
PMC9900818-media-2.xlsx-S7-AAK1 AAK1	84/827	0.00162348	0.53932	1.44749701315954	9.29753780902327	ARF3;BCAR3;FKBP11;LMBR1L;SLC48A1;MTCH1;SLC25A3;OR9K2;PTPRR;ABCD3;CPNE5;TRAF3IP2;PLEK;PRKAG1;MYRFL;FNBP1L;PKD2;NUDT3;RND1;ELK3;ENDOU;TUBA1B;GRM4;GNPTAB;SH3PXD2A;NDST4;OTUD6B;PIM1;TMPO;ANKS1B;WASHC3;IKBIP;EPHA5;APAF1;CCDC158;DNTTIP2;ANK2;KCNK16;SORCS3;TMPRSS11E;F3;KIF6;CACNB3;COL2A1;TMEM106C;DOCK1;RAPGEF3;KMT2D;PARPBP;DHH;DDX23;PPM1H;PPM1K;RPAP3;NPAS3;FGD2;HDAC7;DDN;DRAM1;TESPA1;FIP1L1;SCFD2;SPP1;L…
Dialysis-related Mortality	5/13	0.00167815	0.235276	7.88445163487738	50.3821511271483	STEAP1B;ABCA4;GAS2;SH3BP4;SVIP
PTK6 Regulates RHO GTPases, RAS GTPase And MAP Kinases R-HSA-8849471	5/13	0.00167815	0.631801	7.88445163487738	50.3821511271483	SYNGAP1;ELMO1;RNASE1;DOCK1;ARHGAP35
Chronic Obstructive Pulmonary Disease-Related Biomarkers	6/19	0.00185742	0.24801	5.8247601069687	36.6293865296112	TMEM254;NTM;LINC02284;SFTPD;ANXA11;RNF150
Cholestasis WP5238	6/19	0.00185742	0.39378	5.8247601069687	36.6293865296112	SCARB1;ABCG5;RXRA;ABCB4;SLCO1A2;LDLR
PMC3708595-NIHMS474972-supplement-1.pdf-21-PRKG1 PRKG1	10/47	0.00190595	0.575597	3.41578762631394	21.3923104736927	RABGAP1;TRIM39;ESRP1;PTEN;RTL4;TP53;RYR3;PRKG1;PTPRG;RUNX1
Protein Localization To Chromosome (GO:0034502)	9/40	0.00210984	0.965698	3.6679005817028	22.5984632711042	PARP3;XRCC4;MCM9;APLF;RPA1;RPA2;TERF2IP;FAM47E;TPP1
Externalizing Behaviour (Multivariate Analysis)	40/339	0.00213626	0.262739	1.70169464626214	10.4632104157279	WDR27;TENM2;PARPBP;PSMD11;THSD7B;TRAF3IP2;LINC01470;NTM;ZBTB20;DISC1FP1;SLC1A5;SIPA1L2;SMG6;NPAS3;PDE11A;LRRTM4;ZNF407;REV3L;CTNNA2;GGACT;MFSD4B;PRKG1;RBFOX1;ZFHX3;PTPRN2;LRRN2;BDNF;MINK1;MAGI2;SORCS3;IQCJ;SND1;DCDC1;LRFN2;NFASC;LINC02607;ELMO1;LINC01414;TERF2IP;TOX
Phosphatidic Acid Metabolic Process (GO:0046473)	8/33	0.00223435	0.965698	4.04139249146758	24.6678634564623	AGPAT5;DGKG;GPAM;ACP6;PLA2G2A;PNPLA3;GPAT3;PLD2
Response To Paliperidone In Schizophrenia (Negative Marder Score)	8/33	0.00223435	0.262739	4.04139249146758	24.6678634564623	CCDC122;FSTL5;TENM2;RBFOX1;LINC00390;NRAD1;IQGAP2;SGCZ
Nuclear Receptors In Lipid Metabolism And Toxicity WP299	8/33	0.00223435	0.39378	4.04139249146758	24.6678634564623	ABCG5;ABCD3;VDR;ABCB4;RARB;PPARG;CYP7A1;ABCG1
L1CAM Interactions R-HSA-373760	16/99	0.00230323	0.631801	2.44026759060952	14.8208255692152	NRP2;ITGA1;ANK2;AP2A1;RNASE1;DNM2;SDCBP;DLG1;NFASC;RPS6KA2;KCNQ3;DCX;AP2S1;MAPK1;SPTAN1;ITGA9
GUCYC2 Signaling	5/14	0.00245318	0.984226	7.00802300938541	42.120807134783	PTEN;PDE3A;PRKG2;TP53;PRKG1
Striated Muscle Tissue Development (GO:0014706)	5/14	0.00245318	0.965698	7.00802300938541	42.120807134783	SGCD;PRMT1;BMP7;SGCZ;SGCG
Response To Antidepressants (Symptom Improvement)	5/14	0.00245318	0.262739	7.00802300938541	42.120807134783	NEURL1;PIEZO1;DISC1;SORCS2;ITGA9
SEMA3A-Plexin Repulsion Signaling By Inhibiting Integrin Adhesion R-HSA-399955	5/14	0.00245318	0.631801	7.00802300938541	42.120807134783	RRAS;SEMA3A;FYN;RNASE1;RND1
PMC8200445-JCSM-12-629-s002.xlsx-RET Vs disuse-Unnamed 19 RET	5/14	0.00245318	0.679122	7.00802300938541	42.120807134783	SCARB2;RANBP2;ZBTB20;MAPK1;DMD
Abnormal Calcium Handling And Its Effects On Muscle Contraction In DMD WP5343	5/14	0.00245318	0.39378	7.00802300938541	42.120807134783	RYR1;DTNA;SSPN;DMD;TRDN
22Q11 2 Copy Number Variation Syndrome WP4657	18/118	0.00246498	0.39378	2.27962886597938	13.6904774981731	TSKS;SLC25A1;GP1BA;ESS2;ALDH4A1;HIRA;MRPL40;POLR2A;CLTCL1;UFD1;GSC2;PRODH;TP53;TSSK2;C22ORF39;ASF1A;RAN;DGCR2
Stroke	10/49	0.00264522	0.262739	3.2402685034264	19.2309943552536	ILF3;ZFHX3;CRYBG1;PDE3A;CHD3;KALRN;PRKG1;PTPRG;RUNX1;LINC02006
Sarcoglycan-sarcospan-syntrophin-dystrobrevin complex (mouse)	4/9	0.0027327	0.27172	10.0868618107556	59.5373546326829	SGCD;DTNA;SSPN;SGCG
Systolic Blood Pressure And Diastolic Blood Pressure (Bivariate Analysis)	4/9	0.0027327	0.262739	10.0868618107556	59.5373546326829	RBFOX1;TENM4;PTEN;ANK2
Cognitive Function (Delayed Memory) (Longitudinal)	4/9	0.0027327	0.262739	10.0868618107556	59.5373546326829	DIAPH2;WDR5;PDE3A;PPARG
PMC7573235 F3	4/9	0.0027327	0.772861	10.0868618107556	59.5373546326829	TRAF6;PIM1;PTEN;ILK
NR1H2 And NR1H3 Regulate Gene Expression To Control Bile Acid Homeostasis R-HSA-9623433	4/9	0.0027327	0.631801	10.0868618107556	59.5373546326829	NCOR2;RXRB;RXRA;FABP6
Nuclear receptors in lipid metabolism and toxicity	8/34	0.00273607	0.792096	3.88574428983985	22.9306749215407	ABCG5;ABCD3;VDR;ABCB4;RARB;PPARG;CYP7A1;ABCG1
Role Of Nef In HIV-1 Replication And Disease Pathogenesis R-HSA-164952	7/27	0.00277511	0.631801	4.41845156889495	26.0117052928345	AP2S1;ELMO1;AP2A1;FYN;HLA-A;RNASE1;AP1M2
Endonuclease Activity (GO:0004519)	11/58	0.00303934	0.404841	2.95834909916465	17.1469274165167	TSNAX;ENDOU;ENDOG;RNASET2;PNKP;APLF;ANG;SND1;ANKZF1;SMG6;RAG1
Nuclease Activity (GO:0004518)	11/58	0.00303934	0.404841	2.95834909916465	17.1469274165167	ISG20;RNASE11;RNASET2;PNKP;RNASE6;ANG;RNASE12;RNASE2;RNASE1;SND1;RAG1
Nucleocytoplasmic Transport (GO:0006913)	10/50	0.00309237	0.965698	3.15909090909091	18.2558101820126	RANBP2;LSG1;CITED1;NUP188;ANP32A;NUP62;NUP54;RAE1;HTATIP2;NUP37
PMC8656035-40001 2021 613 MOESM2 ESM.docx-64-TTK TTK	10/50	0.00309237	0.771185	3.15909090909091	18.2558101820126	CLDN20;TRAF3IP2;FAM184A;MCM9;REV3L;NOX3;CEP162;FHL5;ARFGEF3;TRDN
ECM-receptor interaction	14/84	0.00315358	0.792096	2.53008910212474	14.5713352353132	ITGB5;LAMC3;SDC2;ITGA1;COL11A2;GP1BA;THBS2;THBS1;COL2A1;SV2C;SV2B;COL5A1;SPP1;ITGA9
PMC3317641 F6	6/21	0.00327098	0.772861	5.04758009543286	28.8856103768284	KLF6;PSAT1;EMP2;ADM;KLF4;THBS1
Intraocular Pressure	30/241	0.0033125	0.262739	1.80469204165887	10.3048854211953	KANK2;PTPRR;WBP4;PRKAG2;KALRN;UBE2L3;SMG6;NPAS3;SH3PXD2A;SCFD2;CHRNE;CAMTA2;BRD3;RBFOX1;EGLN3;ZFHX3;COL26A1;ANGPT2;LINC02052;SYNJ2;PARD3B;TRDN;DNM1P35;NDUFAF6;TSPAN18;ZNF516;NEURL1;RARB;KBTBD7;MCPH1
Dendrite Morphogenesis (GO:0048813)	8/35	0.00332151	0.965698	3.741625584629	21.3547104044223	DOCK10;CHRNA7;SDC2;MINK1;PTEN;CTNNA2;PAK3;ZNF365
A-cell (X-like): Ghrelin and Nesfatin-1 Synthesis	5/15	0.00345853	0.984226	6.30688010899183	35.7405293444523	PCSK1;PPARG;TAS1R2;MBOAT4;RUNX1
Asthma Exacerbations In Inhaled Corticosteroid Treatment	5/15	0.00345853	0.262739	6.30688010899183	35.7405293444523	ACOT7;RPS10-NUDT3;KCNQ3;NUDT3;TRDN
Shellfish Liking	5/15	0.00345853	0.262739	6.30688010899183	35.7405293444523	KIRREL3;ZFHX3;LRRTM4;MAGI2;CCDC171
PMC3632731 F2	5/15	0.00345853	0.772861	6.30688010899183	35.7405293444523	PDIA3;PTPRN;SPP1;RYR3;RAPGEF3
Hematopoietic Progenitor Cell Differentiation (GO:0002244)	7/28	0.00346834	0.965698	4.20782173715325	23.8334386328833	LMBR1L;BMP4;UFL1;PLEK;MLLT3;MEOX1;TP53
PMC9192715-42003 2022 3448 MOESM13 ESM.xlsx-SD10 DM eGFR loci-Unnamed 3 DMPK	7/28	0.00346834	0.771185	4.20782173715325	23.8334386328833	NRG4;PRKAG2;LOXL4;SH3BP4;SHROOM3;PCK1;DCDC1
L1CAM interactions	15/94	0.00352356	0.792096	2.40245871750794	13.5697678089442	NRP2;ITGA1;AP2A1;ANK2;DNM2;SDCBP;DLG1;NFASC;RPS6KA2;DCX;KCNQ3;AP2S1;MAPK1;SPTAN1;ITGA9
Defense Response To Gram-positive Bacterium (GO:0050830)	14/85	0.00352535	0.965698	2.49431889486335	14.0873541376342	PGLYRP2;PPP1R11;RNASE11;PLA2G2A;RNASE6;HLA-A;RNASE12;RNASE2;RNASE1;TIRAP;FGR;LCE3C;IL12A;ANG
PMC8145441-REVISED Supplementary Table 2 Light.Xlsx-F HS HNS 5hmC-Gene MAP3K14	62/595	0.003554	0.771185	1.48342359616149	8.36603576077665	TENM2;PTPRR;MTMR12;PRAG1;CPQ;LAMC3;WWC1;PRKAG1;PRKAG2;CHD5;TTF2;TFB1M;SIPA1L2;PCSK6;WDR46;BICD1;RYR3;PTPRG;HK1;DOCK10;HOXA10;SYNGAP1;SH3PXD2A;RPS6KA2;SLC12A8;BRD3;MAGI1;EIPR1;ATG9A;ANK2;SORCS2;SND1;RUNX1;NCOR2;RNF207;RAPGEF5;WDR27;PELI2;COL11A2;FBLN1;ACAN;ALS2CL;RNF39;NPHP4;ECT2;GABBR1;ZFHX3;WSCD1;KLF4;SGCZ;LYVE1;MYO1D;NCEH1;CAPN12;TSPAN18;SLCO1A2;LNX1;CPSF4L;CEP43;EIF4G3;RGL2;LGR4
Sarcoglycan-sarcospan-complex SG-SPN (mouse)	3/5	0.00356066	0.27172	18.9030612244898	106.571876920898	SGCD;SSPN;SGCG
53BP1-containing complex (human)	3/5	0.00356066	0.27172	18.9030612244898	106.571876920898	RPA1;RPA2;TP53BP1
Gout (Normal Type)	3/5	0.00356066	0.262739	18.9030612244898	106.571876920898	SV2B;HGF;ABCG2
Serum Polyunsaturated Fatty Acid Concentration X Sex Interaction In Metabolic Syndrome	3/5	0.00356066	0.262739	18.9030612244898	106.571876920898	NTM;DNTTIP2;ANKS1B
Carnitine Levels In Elite Athletes	3/5	0.00356066	0.262739	18.9030612244898	106.571876920898	GABRB3;LDLR;SPC24
Migraine Without Aura And/Or Pulse Pressure	3/5	0.00356066	0.262739	18.9030612244898	106.571876920898	ITGB5;FHL5;TP53
Cleft Lip With Or Without Cleft Palate Or Cleft Palate (Pleiotropy)	3/5	0.00356066	0.262739	18.9030612244898	106.571876920898	DLG1;PAX7;SHROOM3
Proline Levels	3/5	0.00356066	0.262739	18.9030612244898	106.571876920898	DGCR5;PRODH;DGCR2
Contactin-2 Levels	3/5	0.00356066	0.262739	18.9030612244898	106.571876920898	NFASC;NUAK2;TMCC2
Teratocarcinoma-derived Growth Factor 1 Levels	3/5	0.00356066	0.262739	18.9030612244898	106.571876920898	FAM240A;LRRC2;LTF
PMC1850774 F5	3/5	0.00356066	0.772861	18.9030612244898	106.571876920898	PTEN;ILK;FYN
PMC7934812 F2	3/5	0.00356066	0.772861	18.9030612244898	106.571876920898	IRF3;TRAF6;TIRAP
PMC2678718 F1	3/5	0.00356066	0.772861	18.9030612244898	106.571876920898	FYN;CD68;CXCL16
PMC2787730 F10	3/5	0.00356066	0.772861	18.9030612244898	106.571876920898	PTEN;ILK;FYN
PMC2787898 F1	3/5	0.00356066	0.772861	18.9030612244898	106.571876920898	IRF3;TRAF6;TIRAP
PMC7210546 F2	3/5	0.00356066	0.772861	18.9030612244898	106.571876920898	IRF3;TRAF6;TIRAP
PMC3726314 F6	3/5	0.00356066	0.772861	18.9030612244898	106.571876920898	IRF3;TRAF6;TIRAP
PMC3795378 F2	3/5	0.00356066	0.772861	18.9030612244898	106.571876920898	GDNF;BDNF;BMP7
PMC7446622 F4	3/5	0.00356066	0.772861	18.9030612244898	106.571876920898	TRAF6;KEAP1;TIRAP
PMC4370503 F1	3/5	0.00356066	0.772861	18.9030612244898	106.571876920898	RXRB;RXRA;VDR
PMC4701041 F7	3/5	0.00356066	0.772861	18.9030612244898	106.571876920898	ABCG5;ABCB4;LDLR
PMC5560156 F1	3/5	0.00356066	0.772861	18.9030612244898	106.571876920898	IRF3;PTEN;LDLR
PMC6606950 F3	3/5	0.00356066	0.772861	18.9030612244898	106.571876920898	TRAF6;PZP;PTEN
NR1H2 And NR1H3 Regulate Gene Expression Linked To Gluconeogenesis R-HSA-9632974	3/5	0.00356066	0.694837	18.9030612244898	106.571876920898	RXRB;RXRA;PCK1
Ephrin Receptor Signaling Pathway (GO:0048013)	9/43	0.00356556	0.965698	3.34371986499518	18.846658464008	EFNB2;EPHA5;EPHA7;EFNB3;FYN;PAK3;KALRN;ANKS1B;CDK5R1
PMC2790753 F1	9/43	0.00356556	0.772861	3.34371986499518	18.846658464008	RXRB;RXRA;PRKAG1;PRKAG2;PPARG;ADIPOR1;PCK1;FOXO1;NFKBIB
PMC9528698-NIHMS1835045-supplement-Supp Table 34 7.xlsx-TTN control-Gene TTN	38/328	0.00371432	0.771185	1.66527934638952	9.31817207058963	DOCK6;DOCK5;IQGAP2;PRDM11;PKD2;KALRN;RINL;PDZD2;SH3PXD2A;RPS6KA2;ZNF407;LRRC8A;FYN;SHOC1;LDLR;GABBR1;ZFHX3;PLEKHG1;LRRN2;IQSEC1;HEG1;IFFO2;EBF4;PARVB;PLXDC2;CORO2B;PARD3B;NCOR2;SH3RF3;CDC42EP4;ZNF516;YPEL1;ELMO1;LNX1;DSCAML1;DOCK1;AHDC1;ITGA9
SSSCA1	12/68	0.0037486	0.954599	2.70915224405984	15.1343357790655	RPS4X;RPUSD4;MYO1D;SENP5;ENDOG;TBCCD1;PKN3;DPH1;POC1A;NPHP4;SNX33;WDR76
Bilateral Cleft Lip	9/44	0.00419512	0.299616	3.2480093676815	17.7790632190702	TMEM132D;NCOR2;WWOX;COL26A1;ADGRB3;SDC2;ADORA1;SHISAL1;PRKG1
SIRT2 Signaling in Aging	6/22	0.00422104	0.984226	4.73185071574642	25.8722120920624	TUBA1B;FOXO3;PCK1;TP53;FOXO1;SIRT2
miRNA Targets In ECM And Membrane Receptors WP2911	6/22	0.00422104	0.539449	4.73185071574642	25.8722120920624	ITGB5;COL5A1;SDC2;ITGA1;THBS2;THBS1
Phosphatidic Acid Biosynthetic Process (GO:0006654)	7/29	0.00428586	0.965698	4.01634007193352	21.8988285159308	AGPAT5;DGKG;GPAM;ACP6;PNPLA3;GPAT3;PLD2
TTC29	4/10	0.00429035	0.954599	8.40526435216701	45.8203437699896	IKBIP;CDK18;LSG1;OBSL1
HSPA6	4/10	0.00429035	0.954599	8.40526435216701	45.8203437699896	NTNG1;POC1A;ILK;PRODH
Tumor Necrosis Factor Receptor Superfamily Member EDAR Levels	4/10	0.00429035	0.299616	8.40526435216701	45.8203437699896	BRD3;EDAR;ZFPM1;RUNX1
PMC7573235 F4	4/10	0.00429035	0.772861	8.40526435216701	45.8203437699896	TRAF6;PIM1;PTEN;ILK
PMC4391727 F5	4/10	0.00429035	0.772861	8.40526435216701	45.8203437699896	BMP4;BMP3;EMP2;BMP7
PMC6042022 F7	4/10	0.00429035	0.772861	8.40526435216701	45.8203437699896	BACE1;PERP;LDLR;ABCG1
PMC6387316 F3	4/10	0.00429035	0.772861	8.40526435216701	45.8203437699896	ACAN;COL2A1;FOXO3;FOXO1
PMC8073382-genes-12-00603.nxml--NTRK2 NTRK2	4/10	0.00429035	0.77642	8.40526435216701	45.8203437699896	PCSK1;PTEN;PPARG;PCK1
Human papillomavirus type 31	4/10	0.00429035	0.128711	8.40526435216701	45.8203437699896	MAGI1;DLG1;FBLN1;TP53
PMC10014068-ACEL-22-e13766-s001.xlsx-HIFA Venn Diagram-PLK4 VS 608 PLK4	11/61	0.00455978	0.77642	2.78039671682627	14.9876742202157	KDM6B;DNAJB2;CDKN2D;EGLN3;PHF1;PIM1;TACR2;ADM;PRR5L;F3;ARFGEF3
Heart Process (GO:0003015)	5/16	0.00472876	0.965698	5.73321773594253	30.6961730093185	SGCD;FYN;SGCZ;SGCG;TRDN
Migraine And/Or Pulse Pressure	5/16	0.00472876	0.299616	5.73321773594253	30.6961730093185	CFDP1;ITGB5;FHL5;HIC1;SMG6
Bitter Non-Alcoholic Beverage Consumption	5/16	0.00472876	0.299616	5.73321773594253	30.6961730093185	RBFOX1;CYP2A6;HPS1;AHR;ZNF365
PMC2742312-1479-7364-3-3-221-S3.PDF-8-RPS6KA1 RPS6KA1	5/16	0.00472876	0.77642	5.73321773594253	30.6961730093185	STX12;THEMIS2;PPP1R8;RPA2;SMPDL3B
PMC3348545-NIHMS263168-supplement-3.pdf-157-MAPK14 MAPK14	10/53	0.00480345	0.77642	2.93821233845714	15.6854112292183	MTCH1;LRFN2;PPIL1;CPNE5;C6ORF89;PIM1;KCNK16;PI16;KIF6;FGD2
PMC5355058-oncotarget-08-12820-s003.xlsx-DM Genes Network analysis-N1xN2 DMPK	9/45	0.00490813	0.77642	3.15761612021858	16.7886084867775	CUTA;ZBTB9;EIF4A1;TRIM39;PHF1;B3GALT4;WDR46;ZFPM1;SERF2
Thyroid Hormones Common Genomic Effects in Hyperthyroidism	7/30	0.00524099	0.984226	3.84150898629812	20.1727076208595	NCOR2;PTTG1;VDR;C1D;PPARG;CYP7A1;TP53
Anorexia Nervosa	7/30	0.00524099	0.299616	3.84150898629812	20.1727076208595	NTNG1;MYO1D;ALDH4A1;WWOX;CAMK1D;ZNF804B;SORCS2
Ischemic Stroke (Cardioembolic)	7/30	0.00524099	0.299616	3.84150898629812	20.1727076208595	DOCK10;RBFOX1;ZFHX3;KCNE4;NEURL1;PCSK6;HK1
Estimated Glomerular Filtration Rate In Diabetes	6/23	0.00536025	0.299616	4.45326596896427	23.2849877775445	CARMIL1;UBE2Q2;SHROOM3;PRKAG2;OR11A1;TRIM31
PMC7607069 F14	6/23	0.00536025	0.772861	4.45326596896427	23.2849877775445	WWOX;ABL1;MDM4;TP53BP1;TP53;NPAS3
Abcg5-Abcg1 complex (mouse)	2/2	0.00542084	0.27172	37054	193329.406878767	ABCG5;ABCG1
Abcg5-Abcg2 complex (mouse)	2/2	0.00542084	0.27172	37054	193329.406878767	ABCG5;ABCG2
ELMO1-DOCK1 complex (human)	2/2	0.00542084	0.27172	37054	193329.406878767	ELMO1;DOCK1
FOXO3-TP53 complex, oxidative stress stimulated (human)	2/2	0.00542084	0.27172	37054	193329.406878767	FOXO3;TP53
PDK4	2/2	0.00542084	0.506849	37054	193329.406878767	PDHA2;PDHA1
PDK3	2/2	0.00542084	0.506849	37054	193329.406878767	PDHA2;PDHA1
Coffee Consumption	13/80	0.00543474	0.299616	2.45328153751789	12.793722632216	LINGO2;BDNF;AHR;SORCS2;SND1;NPAS3;CYP2A6;LINC02607;RARB;LINC02888;LINC01378;RNF166;ABCG2
PMC9528698-NIHMS1835045-supplement-Supp Table 25.xlsx-TTN control-Gene TTN	18/127	0.00548353	0.782776	2.09038115955736	10.8825362891346	GABRB3;SLC12A2;CARMIL1;IQSEC1;PPM1H;FNBP1L;FOXO3;PLXDC2;KALRN;FOXO1;RGCC;AUH;RPS6KA2;KCNQ3;YPEL1;KYAT1;RAPGEF5;RIMKLB
PMC7017485 F4	10/54	0.00551467	0.772861	2.87127943826508	14.9316394306534	SV2B;PRRG2;PIEZO2;PIEZO1;RASSF8;DMD;CTNNA2;BMPR1B;THBS1;AMOT
Transport of mature mRNAs derived from intronless transcripts	8/38	0.00567104	0.999939	3.36691695108077	17.4149857396938	RANBP2;NUP188;NCBP2;NUP62;NUP54;RAE1;RAN;NUP37
Positive Regulation Of Bone Mineralization (GO:0030501)	8/38	0.00567104	0.965698	3.36691695108077	17.4149857396938	RXRB;BMP4;NELL1;PKDCC;RXRA;BMPR1B;BMP7;LTF
Metabolite Levels	90/940	0.00604301	0.299616	1.3533494959806	6.91406374696352	GABRB3;LINC00582;DOCK5;TENM2;CRYBG1;NALCN-AS1;THSD7B;SLC35F3;LINC01470;LDLRAD3;ETFB;SIPA1L2;LRRC2;LRRTM4;LINC01828;LRRC2-AS1;PIEZO2;REV3L;DLGAP1;MAN1A1;DGCR5;TGM3;LINC01787;DGCR2;ZNF365;KIRREL3;RBFOX1;ACOT7;ITGA1;MAGI2;SHROOM3;TM4SF5;SORCS3;SND1;TRDN;RUNX1;GVINP1;COL2A1;NRG4;SLCO4A1;ELMO1;UMPS;DSCAML1;LINC01411;LINC01378;LINC01376;STEAP1B;NTM;PPM1H;MIR544B;TMTC4;PDZD2;SV2B;FAM184A;DMD;TAS1R2;GPAT…
Gut Microbiota (Bacterial Taxa, Hurdle Binary Method)	22/168	0.00604935	0.299616	1.90884888079076	9.75002744369342	KIRREL3;TENM2;LINC02882;CAMK1D;TENM4;C2ORF66;PPM1H;LDLRAD3;PARVB;NR2E3;HS3ST4;TSPAN15;SGCD;MTHFD1L;LRRTM4;GAS2;ZC3H18;NOX5;DLGAP1;MALRD1;DOCK1;LINC01787
PMC9528698-NIHMS1835045-supplement-Supp Table 21 1.Xlsx-Control TTN-Gene TTN	38/338	0.00609796	0.782776	1.60888734030197	8.20500447653034	NRP2;PKDCC;ANKRD33B;KCNE4;ADM;THBS2;TSPAN11;THBS1;DRAM1;SH3PXD2A;CHSY1;PIEZO2;PIM1;DLGAP1;SLIT3;PAK3;TP53I11;LDLR;CDON;KDM6B;CDK18;PTGIR;CCDC34;VDR;HGF;PLA2G2A;SYNJ2;SORCS2;LYVE1;HIC1;RUNX1;ISG20;CLIP2;COL5A1;NOVA1;NEURL1;PPARG;MCTP2
PMC8564895-jciinsight-6-132335-s029.xlsx-Vec sPIF DM CpGs-Unnamed 7 DMPK	198/2275	0.00611066	0.782776	1.22994137472033	6.26989806540172	PGLYRP2;THSD7B;HPSE2;LDLRAD3;CYB5D1;ELK3;SYNGAP1;IGLON5;NDST4;RPS6KA2;PIEZO2;PIEZO1;SLC12A8;ANKS1B;RBFOX1;ACOT7;FIBCD1;ANK2;ACTN4;RNASE2;SND1;RUNX1;TIAM2;SPATA16;HECW2;PRR12;ZFPM1;SET;DHH;IQGAP2;PRDM11;KALRN;NHLH2;WDR70;SCFD2;EPB41L3;NKX2-3;NTSR1;TRPM3;NTNG1;PHC1;PTPRN2;RNASE11;IQSEC1;HNRNPL;PDE3A;RGL3;CCNJL;GABRB3;PCSK1;TENM2;TENM4;ATF7IP2;PRKAG2;PCSK6;LRRC2;RYR3;SMG6;CLDN20;SH3PXD2A;DLGAP1;RNF1…
Raw Vegetable Consumption	5/17	0.00629799	0.299616	5.25516575840145	26.6306790934399	CARMIL1;MAGI2;LINC01414;RARB;CTNNA2
F-seafood Liking (Derived Food-Liking Factor)	5/17	0.00629799	0.299616	5.25516575840145	26.6306790934399	KIRREL3;ZFHX3;LRRTM4;MAGI2;CCDC171
Retinoic Acid Receptor Signaling Pathway (GO:0048384)	4/11	0.00635205	0.965698	7.204123310318	36.4454976817454	RXRB;RXRA;RARB;PPARG
Gut Microbiota Relative Abundance (Faecalibacterium)	4/11	0.00635205	0.299616	7.204123310318	36.4454976817454	WWOX;CAMK1D;HS3ST4;MCPH1
PMC7876385 F4	4/11	0.00635205	0.772861	7.204123310318	36.4454976817454	DHH;PTEN;FOXO3;ABCG2
PMC7506081 F4	4/11	0.00635205	0.772861	7.204123310318	36.4454976817454	SLC25A1;KEAP1;LDLR;FOXO1
PMC7902901 F3	4/11	0.00635205	0.772861	7.204123310318	36.4454976817454	SET;ACY1;TYSND1;RUNX1
PMC4362780 F3	4/11	0.00635205	0.772861	7.204123310318	36.4454976817454	XRCC4;PNKP;APLF;APTX
PMC6679874 F4	4/11	0.00635205	0.772861	7.204123310318	36.4454976817454	MYOG;PAX7;PTEN;FOXO3
PMC6695051 F4	4/11	0.00635205	0.772861	7.204123310318	36.4454976817454	PTEN;ILK;FOXO3;FOXO1
PMC8296534-12885 2021 8309 MOESM1 ESM.docx-0-AKT1 AKT1	15/100	0.00636026	0.782776	2.2321471798596	11.2894991952743	EPHA7;PTEN;CYBA;PCSK6;AMOT;RUNX1;NCOR2;ADAM29;ELF1;SH3PXD2A;MDM4;FYN;TP53BP1;PCK1;PAK3
PMC2263127-pone.0001816.s001.xls-ERBB2 Up Creighton-Symbol ERBB2	113/1220	0.00636211	0.782776	1.30749508475477	6.61251878334897	CHPF;KEAP1;FBXO22;NUDT3;ARHGAP35;PPIP5K1;RPS6KA2;CAST;SH3GLB2;EPHA7;IMP3;ECH1;ATG9A;PTOV1;HLA-A;SND1;RUNX1;CDC37;MAP1A;PRKD2;TP53;ABCG1;SAR1A;KCNE4;SLC1A5;IQGAP2;FOXO3;MACROH2A2;TBC1D17;SERF2;AP1M2;MPDU1;CDK18;SLC37A1;PTPRN2;VDR;B3GALT4;PARVB;ELL2;ISG20;RGCC;TPP1;FGF13;BMPR1B;ARF3;FKBP11;OGFR;PPP1R11;PRKCSH;PHF1;ADM;CHD3;SMG6;HK1;TUBA1B;ZIC3;UQCRFS1;SPTAN1;CNPPD1;DGCR2;ZNF365;ABCC1;DUSP3;ZER1;RIN…
PMC2263127-pone.0001816.s003.xls-ERBB2 Up Creighton-Symbol ERBB2	113/1220	0.00636211	0.782776	1.30749508475477	6.61251878334897	CHPF;KEAP1;FBXO22;NUDT3;ARHGAP35;PPIP5K1;RPS6KA2;CAST;SH3GLB2;EPHA7;IMP3;ECH1;ATG9A;PTOV1;HLA-A;SND1;RUNX1;CDC37;MAP1A;PRKD2;TP53;ABCG1;SAR1A;KCNE4;SLC1A5;IQGAP2;FOXO3;MACROH2A2;TBC1D17;SERF2;AP1M2;MPDU1;CDK18;SLC37A1;PTPRN2;VDR;B3GALT4;PARVB;ELL2;ISG20;RGCC;TPP1;FGF13;BMPR1B;ARF3;FKBP11;OGFR;PPP1R11;PRKCSH;PHF1;ADM;CHD3;SMG6;HK1;TUBA1B;ZIC3;UQCRFS1;SPTAN1;CNPPD1;DGCR2;ZNF365;ABCC1;DUSP3;ZER1;RIN…
COVID-19 (Hospitalized Vs Population)	14/91	0.00657548	0.299616	2.2992086734376	11.5521619484739	RYR1;MAP4K1;RBFOX1;PTPRN2;SFTPD;ACTN4;MLLT3;KALRN;ADGRB3;LINC01828;DMD;MALRD1;CHST5;ANKS1B
Nuclear Transport (GO:0051169)	8/39	0.00668354	0.965698	3.25813057359903	16.3170660272251	RANBP2;ANP32A;CITED1;NUP188;NUP62;NUP54;RAE1;NUP37
Deep White Matter Hyperintensities	6/24	0.00670902	0.299616	4.2056350829357	21.0462717663563	TENM2;EIPR1;AP2S1;AHR;SBF2;ARHGAP35
PMC6692500 F5	6/24	0.00670902	0.772861	4.2056350829357	21.0462717663563	CYP2A6;PPP3R1;LRRN2;BDNF;RARB;AHR
PMC4478584-elife06907s002.xlsx-LUAD EGFR-Unnamed 8 EGFR	6/24	0.00670902	0.795977	4.2056350829357	21.0462717663563	EPHA5;RYR1;ACAN;THSD7B;ADGRB3;KEAP1
Regulation Of Phosphorylation (GO:0042325)	13/82	0.00671562	0.965698	2.38191383760175	11.9174746709964	CDKN2D;ILK;EMP2;THBS1;BMP7;SIRT2;BMP4;SDCBP;NELL1;ROPN1L;ANG;INHA;ROPN1
Sarcoglycan-sarcospan-dystroglycan complex (mouse)	3/6	0.00673175	0.299937	12.6013605442177	63.0183901685683	SGCD;SSPN;SGCG
Axon Extension Involved In Axon Guidance (GO:0048846)	3/6	0.00673175	0.965698	12.6013605442177	63.0183901685683	NELL1;SEMA3A;SLIT2
Cellular Response To Caffeine (GO:0071313)	3/6	0.00673175	0.965698	12.6013605442177	63.0183901685683	RYR1;CASQ2;RYR3
Dendrite Arborization (GO:0140059)	3/6	0.00673175	0.965698	12.6013605442177	63.0183901685683	NELL1;SEMA3A;ZNF365
Neuron Projection Extension Involved In Neuron Projection Guidance (GO:1902284)	3/6	0.00673175	0.965698	12.6013605442177	63.0183901685683	NELL1;SEMA3A;SLIT2
Regulation Of Vitamin D Receptor Signaling Pathway (GO:0070562)	3/6	0.00673175	0.965698	12.6013605442177	63.0183901685683	KANK2;RXRB;RXRA
Release Of Sequestered Calcium Ion Into Cytosol By Sarcoplasmic Reticulum (GO:0014808)	3/6	0.00673175	0.965698	12.6013605442177	63.0183901685683	RYR1;RYR3;TRDN
Response To Caffeine (GO:0031000)	3/6	0.00673175	0.965698	12.6013605442177	63.0183901685683	RYR1;CASQ2;RYR3
Arginine N-methyltransferase Activity (GO:0016273)	3/6	0.00673175	0.741837	12.6013605442177	63.0183901685683	PRMT6;PRMT1;PRMT3
G Alloprevotella Abundance	3/6	0.00673175	0.299616	12.6013605442177	63.0183901685683	EPHA5;FAM240A;ABCA4
Optic Nerve Head Parameters (Multi-Trait Analysis)	3/6	0.00673175	0.299616	12.6013605442177	63.0183901685683	EPB41L3;RARB;KIF6
Aspartate Aminotransferase Levels In Low Dose Methotrexate Treatment	3/6	0.00673175	0.299616	12.6013605442177	63.0183901685683	RIMBP2;THSD4;TMC2
Tripeptidyl-peptidase 1 Levels	3/6	0.00673175	0.299616	12.6013605442177	63.0183901685683	GNPTAB;M6PR;TPP1
Metabolite Levels (5-HIAA)	3/6	0.00673175	0.299616	12.6013605442177	63.0183901685683	WWOX;LINC01036;SMG6
Liver Fibrosis Severity In HIV/hepatitis C Co-Infection	3/6	0.00673175	0.299616	12.6013605442177	63.0183901685683	OXTR;CAV3;SDK2
Vaginal Microbiome MetaCyc Pathway (PWY0-1241|ADP-L-glycero-&beta;-D-manno-heptose Biosynthesis)	3/6	0.00673175	0.299616	12.6013605442177	63.0183901685683	KIRREL3;SPESP1;RARB
N-acylethanolamine-hydrolyzing Acid Amidase Levels	3/6	0.00673175	0.299616	12.6013605442177	63.0183901685683	GNPTAB;ART3;WASHC3
Lysosomal Protective Protein Levels	3/6	0.00673175	0.299616	12.6013605442177	63.0183901685683	GNPTAB;M6PR;WASHC3
Lamb Or Mutton Consumption (UKB Data Field 1379)	3/6	0.00673175	0.299616	12.6013605442177	63.0183901685683	RBFOX1;CADPS;CCDC171
Mannose	3/6	0.00673175	0.727029	12.6013605442177	63.0183901685683	MAN1A2;MAN1A1;HK1
PMC2477698 F1	3/6	0.00673175	0.772861	12.6013605442177	63.0183901685683	BDNF;KEAP1;FOXO3
PMC7682108 F1	3/6	0.00673175	0.772861	12.6013605442177	63.0183901685683	ABCG5;LDLR;ABCG1
PMC2891859 F1	3/6	0.00673175	0.772861	12.6013605442177	63.0183901685683	GDNF;BDNF;FYN
PMC2943133 F2	3/6	0.00673175	0.772861	12.6013605442177	63.0183901685683	IRF3;TRAF6;TIRAP
PMC3555197 F1	3/6	0.00673175	0.772861	12.6013605442177	63.0183901685683	ABCG5;LDLR;ABCG1
PMC4940627 F6	3/6	0.00673175	0.772861	12.6013605442177	63.0183901685683	ABCG5;ABCB4;LDLR
PMC4945843 F1	3/6	0.00673175	0.772861	12.6013605442177	63.0183901685683	LDLR;CYP7A1;ABCG1
PMC5002468 F1	3/6	0.00673175	0.772861	12.6013605442177	63.0183901685683	RYR1;BDNF;RYR3
PMC5085112 F7	3/6	0.00673175	0.772861	12.6013605442177	63.0183901685683	ABCG5;ABCB4;LDLR
PMC5360632 F1	3/6	0.00673175	0.772861	12.6013605442177	63.0183901685683	RXRB;RXRA;VDR
PMC5878942 F3	3/6	0.00673175	0.772861	12.6013605442177	63.0183901685683	PRMT3;PCK1;FOXO1
PMC5966448 F6	3/6	0.00673175	0.772861	12.6013605442177	63.0183901685683	GPR176;ZBTB20;FOXO1
Vitamin A1 And A5 X Pathways WP5397	3/6	0.00673175	0.695561	12.6013605442177	63.0183901685683	RXRB;RXRA;RARB
RNA Metabolic Process (GO:0016070)	16/111	0.00726212	0.965698	2.13063613047719	10.4935615396804	DHX8;RNASET2;RNASE6;DNTTIP2;NOL9;RNASE2;RNASE1;BICD1;NUDT3;HNRNPL;ISG20;SUPV3L1;NOVA1;PPP1R8;ANG;EXOSC2
PMC10025425-mmc3.xlsx-TLK2 CNCR2-gene TLK2	25/202	0.00742482	0.812538	1.78992258950588	8.7758606707293	AP2A1;SRP14;DOCK10;RPS4X;RPS18;EPB41L3;AP2S1;NEFL;TP53BP1;CTNNA2;SPTAN1;PPFIA2;GTF2I;ACOT7;PDHA1;RPL22;ANK2;HLA-A;HNRNPL;CLIP2;ILF3;PCCA;MAP1A;DCX;RPL29
Survival In Pancreatic Cancer	7/32	0.00761831	0.332528	3.53380627557981	17.2350840133067	RBFOX1;IQSEC1;ZNF207;CTNNA2;LIN7C;SBF2;B4GALT4
Energy metabolism	9/48	0.00761961	0.999939	2.91424968474149	14.2128836101768	PPP3R1;RXRA;PRMT1;PRKAG1;PRKAG2;PPARG;FOXO3;TFB1M;FOXO1
PMC4111730-rna-10-1017-s01.pdf-16-RIPK1 RIPK1	9/48	0.00761961	0.812538	2.91424968474149	14.2128836101768	MAGI1;MON2;SYNGAP1;EFNB3;PRKCSH;BMF;TP53BP1;EBF4;ATP1B2
Energy Metabolism WP1541	9/48	0.00761961	0.695561	2.91424968474149	14.2128836101768	PPP3R1;RXRA;PRMT1;PRKAG1;PRKAG2;PPARG;TFB1M;FOXO3;FOXO1
AKT3 human kinase ARCHS4 coexpression	34/299	0.00770994	0.999996	1.62824812828615	7.92182595800563	SLC24A2;RABGAP1;TENM4;TSHZ1;DIRAS2;KALRN;BICD1;NUDT3;SV2B;FUT9;MAN1A2;EPB41L3;CLVS2;DLGAP1;CTNNA2;PAK3;SPTAN1;ZNF365;PPFIA2;RBFOX1;ZNF483;GABBR1;ANK2;SYN2;MYO9A;CORO2B;BACE1;NFASC;ADGRB3;MAP1A;KCNQ3;RAPGEF5;AHDC1;CDK5R1
Endometrial Cancer	8/40	0.00782697	0.332528	3.1561433447099	15.3078614506325	LINGO2;NTM;RNASET2;KIF26B;SSPN;PPARG;RNF150;EIF2AK4
Response To Amphetamines	8/40	0.00782697	0.332528	3.1561433447099	15.3078614506325	PDP1;WWOX;NELL1;PTPRN2;PAX7;LINC01470;ABL1;CNTNAP4
Pancreas Beta Cells	8/40	0.00782697	0.391349	3.1561433447099	15.3078614506325	PCSK1;VDR;DCX;IAPP;SRP14;PAK3;FOXO1;NEUROG3
PMC3348545-NIHMS263168-supplement-3.pdf-250-HIPK3 HIPK3	8/40	0.00782697	0.812538	3.1561433447099	15.3078614506325	COMMD9;TRAF6;TSPAN18;CHST1;LDLRAD3;PRDM11;TP53I11;RAG1
PMC9510835-Table 2.docx-16-SYK SYK	8/40	0.00782697	0.812538	3.1561433447099	15.3078614506325	RXRA;NFIL3;MME;PELI2;GPAT3;ROPN1L;OSBPL11;PLXDC2
MOCOS	5/18	0.00819932	0.954599	4.85066023894362	23.301137887399	DOCK5;IRF3;IQCF1;HSD17B8;HDAC7
Migraine And/Or Diastolic Blood Pressure	5/18	0.00819932	0.341742	4.85066023894362	23.301137887399	NCOR2;CFDP1;HPSE2;ITGB5;FHL5
PMC1592643 F3	5/18	0.00819932	0.772861	4.85066023894362	23.301137887399	ENDOG;APAF1;GAS2;TNFRSF25;TP53
Ephrin Signaling R-HSA-3928664	5/18	0.00819932	0.999865	4.85066023894362	23.301137887399	EFNB2;SDCBP;EFNB3;FYN;RNASE1
PMC10363146-41598 2023 38681 MOESM1 ESM.pdf-422-PAK7 PAK5	5/18	0.00819932	0.825398	4.85066023894362	23.301137887399	ERCC6L;AIFM2;CADPS;ADAT1;PRKG1
Metanephros Development (GO:0001656)	6/25	0.0082876	0.965698	3.98407060596276	19.095628811595	BMP4;CITED1;GDNF;WNT7B;PKD2;BMP7
Moyamoya Disease	6/25	0.0082876	0.341742	3.98407060596276	19.095628811595	CFDP1;MAGI2;SMPDL3B;SBF2;TMEM170A;DOCK1
Smoking Initiation (Ever Regular Vs Never Regular) (MTAG)	43/401	0.00845738	0.343688	1.52609094815799	7.2835976308291	WDR27;LINC02462;TENM2;THSD7B;NTM;TMEM200C;ZBTB20;DISC1FP1;CHD3;FOXO3;NOL4;SMG6;NPAS3;PDE11A;MAN1A2;ZNF407;ZNF207;REV3L;DLGAP1;RNF150;CTNNA2;GGACT;SLIT2;MFSD4B;ANKS1B;RBFOX1;ZFHX3;FKRP;PTPRN2;BDNF;MAGI2;ZNF804B;B3GALT4;SORCS3;ADGRB3;LINC01414;ELMO1;RARB;GALNTL6;TOX;EIF4G3;CNTNAP4;HCN1
EPH-ephrin Mediated Repulsion Of Cells R-HSA-3928665	9/49	0.00873885	0.999865	2.84123975409836	13.4674105682346	EPHA5;EFNB2;EPHA7;EFNB3;CLTCL1;AP2S1;AP2A1;FYN;RNASE1
PMC4951236-oncotarget-07-17608-s003.xlsx-Sheet1-Supplementary Table 2 Binders Of MAPK1 Predicted By OncoBinder Or Coexpression-based Algorithms MAPK1	9/49	0.00873885	0.842706	2.84123975409836	13.4674105682346	PTPRR;EGLN3;GNPTAB;RPS6KA2;ARRB2;TP53BP1;MICOS10;ECT2;TP53
Oxidoreductase Activity, Acting On NAD(P)H, Oxygen As Acceptor (GO:0050664)	4/12	0.00897856	0.741837	6.30326752893125	29.7067707855718	CYB5R4;NOX3;CYBA;NOX5
PMC7751760 F5	4/12	0.00897856	0.772861	6.30326752893125	29.7067707855718	IRF3;TRAF6;FYN;FOXO1
PMC4251064 F4	4/12	0.00897856	0.772861	6.30326752893125	29.7067707855718	PERP;PTEN;MDM4;SDK2
PMC10168183-Data Sheet 2.xlsx-Table S13-Table S13 Overlapping Genes Between The MAPK3 Ppi String Network And The Turquoise WGCNA Co-Expression Module MAPK3	4/12	0.00897856	0.842706	6.30326752893125	29.7067707855718	DUSP3;MAPK1;ARRB2;TP53
Bile Acids Synthesis And Enterohepatic Circulation WP4389	4/12	0.00897856	0.717162	6.30326752893125	29.7067707855718	ABCG5;MAPK1;LDLR;CYP7A1
RNA Endonuclease Activity (GO:0004521)	8/41	0.00911122	0.741837	3.06033715999586	14.3782241705282	TSNAX;ENDOU;ENDOG;RNASET2;ANG;ANKZF1;SND1;SMG6
PMC10055215-media-1.xlsx-Table S1 CMG Variants-Gene Name CASK	26/216	0.00913227	0.842706	1.73412141272324	8.14333126781979	RYR1;DOCK6;KMT2D;TENM2;DNAH2;TENM4;NUP188;LAMC3;PNKP;AKAP8;KALRN;PTPRG;GRM4;CHRNE;TMEM67;KIF1C;NKX2-3;SGCG;ABCA4;MINK1;DISP3;LRFN2;MAP1A;SLCO1A2;DCHS1;RGL3
Vertex-wise Sulcal Depth	58/576	0.0094291	0.373993	1.42505423141466	6.6463877582746	NRP2;LAMC3;PRKAG2;ZBTB20;FNBP1L;PCSK6;BICD1;GLI3;ELK3;SMG6;TRAPPC12;SLC12A8;RBFOX1;SHROOM3;ACTN4;RAD23B;KIF6;SND1;TIAM2;SPATA16;COL2A1;PCCA;PAX7;ZNF516;ELMO1;RARB;PRR12;MCTP2;NBL1;MCPH1;LINC01376;STEAP1B;PKDCC;SEMA3A;FOXO3;MLLT3;THSD4;PDZD2;SCFD2;TP53I11;WWOX;EGLN3;ZFHX3;RNLS;VTA1;CADPS;IFFO2;PLXDC2;SH3RF3;BMP3;DLG1;TSPAN18;KIF26B;PLCH1;CCDC3;SDK2;UMODL1;CCDC171
Neuron Projection Guidance (GO:0097485)	17/124	0.00946987	0.965698	2.00998767587553	9.36581826006747	EPHA5;DRAXIN;EPHA7;BDNF;SEMA3A;UNC5C;KALRN;ARHGAP35;EFNB2;NELL1;NFASC;EFNB3;FYN;EMB;SLIT2;DSCAML1;CDK5R1
Carotid Intima-media Thickness (Mean Of The Maximum cIMT)	17/124	0.00946987	0.373993	2.00998767587553	9.36581826006747	CDK17;TENM2;NALCN-AS1;IQGAP2;LRRC37A5P;TMEM170A;LEMD1;THSD4;PDZD2;COL5A1;CALD1;ELMO1;LINC02735;PDE3A;LNX1;CTNNA2;RAPGEF5
PMC7783806 F8	14/95	0.00957911	0.772861	2.18519364692543	10.1571522164038	MYOG;BHLHE41;PTEN;PTPRG;DNM2;DUSP7;NCOR2;RXRB;RXRA;ABL1;RARB;MAPK1;TP53;PRKG1
Non-coding RNA metabolism	9/50	0.00997832	0.999939	2.77179128348661	12.7705857768727	RANBP2;NUP188;NCBP2;NUP62;NUP54;RAE1;SNUPN;SNRPB;NUP37
RXR/VDR pathway	6/26	0.0101159	0.999939	3.78466257668712	17.3853965346402	RXRB;NCOR2;RXRA;VDR;RARB;PPARG
Dendritic Spine Organization (GO:0097061)	6/26	0.0101159	0.965698	3.78466257668712	17.3853965346402	DOCK10;CHRNA7;PTEN;FYN;PAK3;ZNF365
Signaling events mediated by HDAC Class III Homo sapiens a7191c08-6195-11e5-8ac5-06603eb7f303	6/26	0.0101159	0.991991	3.78466257668712	17.3853965346402	HOXA10;TUBA1B;FOXO3;TP53;FOXO1;SIRT2
Schizophrenia	93/996	0.0102738	0.396512	1.31528720689489	6.02159255956583	TENM2;LINC02882;THSD7B;LINC01470;RTKN2;ZFAND2B;LRRC4;ZBTB20;SIPA1L2;RYR3;PTPRG;SMG6;SYNGAP1;SGCD;LRRTM4;ZNF407;PRKG2;PRKG1;PPFIA2;ANKS1B;ZNF365;KIRREL3;RBFOX1;EIPR1;ANKRD44;MAGI2;NOSIP;ANK2;SORCS3;SHISA9;SND1;C1ORF167;TMC2;NCOR2;IRF3;ADGRB3;HECW2;LINC02829;LINC01414;KCNQ3;CFAP58;CCDC192;RARB;DOCK1;ITGA9;SEMA3A;NTM;PELI2;FOXO3;KALRN;NOL4;NPAS3;FSTL5;PPP3R1;MTHFD1L;FUT9;FAM184A;PRRG2;PAK6;LINC00678…
PMC3930188-813067.f1.pdf-111-PRKACA PRKACA	11/68	0.0104544	0.913936	2.43802049583603	11.119155309348	PRMT6;PRKCSH;PRMT1;PRMT3;PRKAG1;PRKAG2;PRKG2;PRKD2;PRR12;PRODH;PRKG1
PMC5189935-pmed.1002201.s013.xlsx-HR-HER2- Amplification-3P25 1 ERBB2	11/68	0.0104544	0.913936	2.43802049583603	11.119155309348	CAND2;FGD5;RPL32;IQSEC1;RARB;C3ORF20;PPARG;CCDC174;SYN2;TIMP4;GRIP2
Lissencephaly gene (LIS1) in neuronal migration and development	5/19	0.0104643	0.999939	4.50394122226547	20.5370135714116	DCTN6;DNAH2;ABL1;DCX;CDK5R1
Regulation Of Behavior (GO:0050795)	5/19	0.0104643	0.965698	4.50394122226547	20.5370135714116	ZFHX3;HOXA1;EIF2AK4;QRFP;CNTNAP4
tRNA Metabolic Process (GO:0006399)	5/19	0.0104643	0.965698	4.50394122226547	20.5370135714116	KARS1;ADAT1;RPP21;ANG;FARS2
RNA Cap Binding (GO:0000339)	5/19	0.0104643	0.741837	4.50394122226547	20.5370135714116	EIF4A1;NCBP2;DCPS;EIF4G3;SNUPN
Bilateral Cleft Lip And Palate	5/19	0.0104643	0.396512	4.50394122226547	20.5370135714116	CAST;TENM2;PTPRN2;DRAM1;SGCD
Cognitive Performance (Language Ability) (Longitudinal)	5/19	0.0104643	0.396512	4.50394122226547	20.5370135714116	DOCK10;COL26A1;LINC01414;SLIT3;PTPRG
PMC3553975 F8	5/19	0.0104643	0.772861	4.50394122226547	20.5370135714116	NCOR2;DNTTIP2;MAPK1;PPARG;RUNX1
Positive Regulation Of Neuron Death (GO:1901216)	7/34	0.0107094	0.965698	3.27168915163458	14.8424523430077	EFNB2;BACE1;DAXX;EPHA7;FYN;FOXO3;CDK5R1
FXR and LXR regulation of cholesterol metabolism	3/7	0.0111387	0.999939	9.45051020408163	42.5020679866659	RXRA;FABP6;LDLR
Neurofascin interactions	3/7	0.0111387	0.999939	9.45051020408163	42.5020679866659	SDCBP;NFASC;DCX
T Cell Apoptotic Process (GO:0070231)	3/7	0.0111387	0.965698	9.45051020408163	42.5020679866659	LMBR1L;EBF4;GLI3
Release Of Sequestered Calcium Ion Into Cytosol By Endoplasmic Reticulum (GO:1903514)	3/7	0.0111387	0.965698	9.45051020408163	42.5020679866659	RYR1;RYR3;TRDN
Cyclic Nucleotide-Dependent Protein Kinase Activity (GO:0004690)	3/7	0.0111387	0.741837	9.45051020408163	42.5020679866659	PRKAG1;PRKG2;PRKG1
Response To Treatment In Irritable Bowel Syndrome (Symptom Severity)	3/7	0.0111387	0.405622	9.45051020408163	42.5020679866659	SCFD2;CCDC3;LINC02006
Breast Cancer (Estrogen-Receptor Negative, Progesterone-Receptor Negative, And Human Epidermal Growth Factor-Receptor Negative)	3/7	0.0111387	0.405622	9.45051020408163	42.5020679866659	RPS18;MDM4;TP53
Coffee Type: Decaffeinated Coffee (Any Type) (UKB Data Field 1508 1)	3/7	0.0111387	0.405622	9.45051020408163	42.5020679866659	NCOR2;CTNNA2;BICD1
PMC2235195 F1	3/7	0.0111387	0.772861	9.45051020408163	42.5020679866659	RXRB;RXRA;RARB
PMC7918430 F2	3/7	0.0111387	0.772861	9.45051020408163	42.5020679866659	BMP4;BMP3;BMP7
PMC7094289 F1	3/7	0.0111387	0.772861	9.45051020408163	42.5020679866659	IRF3;TRAF6;TIRAP
PMC2930673 F2	3/7	0.0111387	0.772861	9.45051020408163	42.5020679866659	ABCB6;CPOX;ABCG2
PMC3075579 F4	3/7	0.0111387	0.772861	9.45051020408163	42.5020679866659	IRF3;TRAF6;PTEN
PMC7263617 F4	3/7	0.0111387	0.772861	9.45051020408163	42.5020679866659	IRF3;TRAF6;TIRAP
PMC7934812 F1	3/7	0.0111387	0.772861	9.45051020408163	42.5020679866659	IRF3;TRAF6;TIRAP
PMC7435111 F1	3/7	0.0111387	0.772861	9.45051020408163	42.5020679866659	ABCB6;CPOX;ABCG2
PMC3662247 F6	3/7	0.0111387	0.772861	9.45051020408163	42.5020679866659	IRF3;TRAF6;TIRAP
PMC7140515 F1	3/7	0.0111387	0.772861	9.45051020408163	42.5020679866659	PDHA1;PTEN;SIRT2
PMC6943888 F1	3/7	0.0111387	0.772861	9.45051020408163	42.5020679866659	BACE1;SET;BDNF
PMC7714932 F3	3/7	0.0111387	0.772861	9.45051020408163	42.5020679866659	PTEN;HDAC8;FOXO3
PMC4099360 F1	3/7	0.0111387	0.772861	9.45051020408163	42.5020679866659	IRF3;TRAF6;TIRAP
PMC4373479 F1	3/7	0.0111387	0.772861	9.45051020408163	42.5020679866659	IRF3;TRAF6;TIRAP
PMC4438421 F3	3/7	0.0111387	0.772861	9.45051020408163	42.5020679866659	IRF3;TRAF6;TIRAP
PMC4453439 F1	3/7	0.0111387	0.772861	9.45051020408163	42.5020679866659	PAX7;PTEN;FOXO1
PMC5953846 F8	3/7	0.0111387	0.772861	9.45051020408163	42.5020679866659	NPS;ABCC1;ABCG2
PMC6164406 F1	3/7	0.0111387	0.772861	9.45051020408163	42.5020679866659	IRF3;TRAF6;TIRAP
PMC6230871 F3	3/7	0.0111387	0.772861	9.45051020408163	42.5020679866659	SGCD;DMD;SGCG
PMC6415318 F7	3/7	0.0111387	0.772861	9.45051020408163	42.5020679866659	ABCG5;LDLR;CYP7A1
Neurofascin Interactions R-HSA-447043	3/7	0.0111387	0.999865	9.45051020408163	42.5020679866659	SDCBP;NFASC;DCX
HSPA5	12/78	0.0113792	0.954599	2.29743015369299	10.2832292864726	EPHA7;PRSS50;DHH;SIGLEC12;DNAJB11;SIGLEC10;HAPLN3;INHA;B4GALT4;ITGA9;HS3ST2;CCNJL
PMC9528698-NIHMS1835045-supplement-Supp Table 21 10.xlsx-TTN control-Gene TTN	38/352	0.0114936	0.97902	1.53597283561553	6.85959970550872	DOCK5;PLEKHH2;TENM4;ITGB5;IQGAP2;PCSK6;FOXO3;KALRN;MEOX1;BICD1;THSD4;PTPRG;DYNC2LI1;SLC22A15;PDZD2;RPS6KA2;ACP6;RIMKLB;ZNF365;KIRREL3;CARMIL1;ZFHX3;OSBPL6;MME;HEG1;ITGA1;SHROOM3;PLXDC2;SH3RF3;BMP4;MYO1D;ELF1;NFASC;RGCC;NDUFAF6;KCNQ3;PI16;CCDC171
RAC1 GTPase Cycle R-HSA-9013149	22/178	0.0116805	0.999865	1.78551485270989	7.94525173299387	DOCK6;DOCK5;PLEKHG1;PRKCSH;ARHGAP29;CYBA;SLC1A5;IQGAP2;RNASE1;KALRN;ARHGAP35;PLD2;DOCK10;TIAM2;VANGL1;ARHGAP31;FGD5;CDC42EP4;NOX3;ECT2;DOCK1;TMPO
Risk-taking Behavior (Multivariate Analysis)	19/147	0.0116944	0.420397	1.87833670048143	8.35606105220062	EPHA5;RBFOX1;TENM2;THSD7B;BDNF;NTM;CHD3;SORCS3;SND1;LRPPRC;LRFN2;NFASC;PCCA;LRRTM4;REV3L;RARB;DLGAP1;CTNNA2;TOX
COVID-19	17/127	0.0118987	0.422329	1.9548513986014	8.66258345173355	MAGI1;NTNG1;RBFOX1;CHRNA7;MAGI2;ATF7IP2;TYSND1;MYRFL;ANK2;PCSK6;POLR2A;ELMO1;POC1A;POLR1HASP;PRANCR;SDK2;ARFGEF3
XRCC4	4/13	0.0122232	0.954599	5.60260192118599	24.6762127075277	PNKP;APLF;IFFO2;APTX
NUPL1	4/13	0.0122232	0.954599	5.60260192118599	24.6762127075277	OSBPL6;NUP62;NUP54;RNF166
Positive Regulation Of Double-Strand Break Repair Via Nonhomologous End Joining (GO:2001034)	4/13	0.0122232	0.965698	5.60260192118599	24.6762127075277	MAD2L2;PARP3;PNKP;WRAP53
Platelet-derived Growth Factor BB Levels	4/13	0.0122232	0.428423	5.60260192118599	24.6762127075277	DOCK10;RBFOX1;KCNE4;PCSK6
PMC7905242 F4	4/13	0.0122232	0.772861	5.60260192118599	24.6762127075277	SHBG;F3;LDLR;ABCG2
PMC6975221 F5	4/13	0.0122232	0.772861	5.60260192118599	24.6762127075277	RXRA;PTEN;CASQ2;TRDN
PMC3882710 F8	4/13	0.0122232	0.772861	5.60260192118599	24.6762127075277	MYOG;FGR;PNPLA3;ENO3
PMC4398700 F3	4/13	0.0122232	0.772861	5.60260192118599	24.6762127075277	CAST;PIM1;AHR;F3
PMC6088210 F1	4/13	0.0122232	0.772861	5.60260192118599	24.6762127075277	IRF3;CD80;TRAF6;TIRAP
PMC6280669 F2	4/13	0.0122232	0.772861	5.60260192118599	24.6762127075277	IRF3;CD80;TRAF6;TIRAP
PMC6650088 F2	4/13	0.0122232	0.772861	5.60260192118599	24.6762127075277	CHIT1;SET;PTEN;RUNX1
PMC9528698-NIHMS1835045-supplement-Supp Table 58 4.xlsx-TTN control-Gene TTN	14/98	0.0124682	0.999995	2.10680831619831	9.23745072651183	CARMIL1;PLEKHH2;SHROOM3;PCSK6;PLXDC2;KALRN;THSD4;NPAS3;PTPRG;HS3ST2;MYO1D;PDZD2;ZNF407;PI16
HIV factor interactions with host	17/128	0.0128092	0.999939	1.93713493713494	8.44123912342555	RANBP2;PSMD11;NUP188;HMGA1;AP2A1;HLA-A;PSMB6;PSMD7;NUP62;ELMO1;AP2S1;NUP54;FYN;RAE1;AP1M2;RAN;NUP37
TEK human kinase ARCHS4 coexpression	33/299	0.0130346	0.999996	1.57323778195489	6.82808641544096	KANK2;DOCK6;NRP2;ECE1;THBS1;ELK3;PTPRG;EFNB2;FGD5;RPS6KA2;KIF1C;FAM43A;LRRC8A;A2M;HEG1;PLEKHG5;SFTPD;ITGA1;RASSF8;ARHGAP29;LYVE1;ARHGAP31;COL5A1;HECW2;TSPAN18;DCHS1;RAPGEF5;MFGE8;IL6ST;DOCK1;RAPGEF3;F2RL2;ITGA9
COVID-19 (Hospitalized Vs Tested, Not Hospitalized)	10/61	0.01305	0.443318	2.47624408615121	10.7443488274288	RYR1;WWOX;RBFOX1;EIF3K;ADGRB3;LINC01828;DMD;MLLT3;KALRN;ANKS1B
Negative Regulation Of Phosphate Metabolic Process (GO:0045936)	5/20	0.0131225	0.965698	4.20345140781108	18.215360780693	CDKN2D;BMP4;PLEK;INHA;BMP7
Mammographic Density (Dense Area)	5/20	0.0131225	0.443318	4.20345140781108	18.215360780693	LINC01376;MAGI2;SSPN;PPARG;PRKG1
Platelet Aggregation	5/20	0.0131225	0.443318	4.20345140781108	18.215360780693	NEURL1;CCDC3;ESS2;SGCZ;TSSK2
PMC6322547 F1	5/20	0.0131225	0.772861	4.20345140781108	18.215360780693	ILK;FYN;SLIT3;SLIT2;BMP7
Hereditary Leiomyomatosis And Renal Cell Carcinoma Pathway WP4206	5/20	0.0131225	0.931695	4.20345140781108	18.215360780693	PDHA2;PDHA1;PRKAG1;KEAP1;TP53
PMC3432194 F2	12/80	0.0137993	0.772861	2.22961710351492	9.54975300107143	SLC24A2;WDR27;ADAM29;WWOX;CAV3;EPB41L3;ELMO1;ABL1;CTNNA2;RNASE1;SORCS2;DCDC1
Interactions of HIV Vpr protein with host cellular proteins	8/44	0.0139077	0.999939	2.80485400075844	11.9916252601561	RANBP2;NUP188;NUP62;HMGA1;NUP54;RAE1;RAN;NUP37
Positive Regulation Of Osteoblast Differentiation (GO:0045669)	8/44	0.0139077	0.965698	2.80485400075844	11.9916252601561	BMP4;NELL1;HGF;WNT7B;BMPR1B;IL6ST;BMP7;LTF
PMC8145441-REVISED Supplementary Table 2 Light.Xlsx-D HS HNS BS-Gene MAP3K14	203/2388	0.0142751	0.999995	1.19549036919584	5.07992426705443	CPNE5;HPSE2;LDLRAD3;IL4I1;GOLGA4;SYNGAP1;RPS6KA2;PIEZO2;PIEZO1;ROPN1L;SLC12A8;ANKS1B;GABARAPL2;RBFOX1;ENDOG;ACOT7;ANK2;ACTN4;SND1;RUNX1;HECW2;PRR12;NBL1;ZFPM1;ABCB4;IQGAP2;PDCD11;EPB41L3;ST3GAL6;SLC10A7;ICMT;PTPRN2;DTNA;IQSEC1;TNFSF12;SIGLEC11;ABCA4;RASSF8;IFFO2;NCEH1;NOX5;CCNJL;FKBP11;CLIC6;NRP2;CITED1;TENM4;SLC44A2;MRPS12;PRKAG2;KRI1;WDR46;PTPRG;SMG6;AUH;SH3PXD2A;DLGAP1;EMB;CD33;ZNF365;MYOG;MME…
PMC5189935-pmed.1002201.s013.xlsx-HR-HER2- Amplification-12P11 23 ERBB2	9/53	0.0144938	0.999995	2.58238636363636	10.9339149111523	IPO8;SLCO1A2;CAPRIN2;BHLHE41;PDE3A;SSPN;RASSF8;IAPP;TSPAN11
Nef in HIV-1 replication and disease pathogenesis	6/28	0.0145983	0.999939	3.4402305261201	14.5413418777734	AP2S1;ELMO1;AP2A1;FYN;HLA-A;AP1M2
Aspartate Aminotransferase Levels In Low Alcohol Consumption	6/28	0.0145983	0.443355	3.4402305261201	14.5413418777734	TMEM132D;SLC25A3;CFDP1;ABCA4;PIEZO1;KALRN
Neuropeptide Receptor Activity (GO:0008188)	7/36	0.0146218	0.804829	3.04572611375076	12.8689260185009	NPFFR1;NPY1R;TACR2;NMBR;SORCS3;SORCS2;NTSR1
Protein Kinase C Binding (GO:0005080)	7/36	0.0146218	0.804829	3.04572611375076	12.8689260185009	HINT1;PRKCSH;PLEK;DACT3;PRKD2;ADCY6;TIRAP
Lifetime Smoking (Without Educational Attainment)	7/36	0.0146218	0.443355	3.04572611375076	12.8689260185009	TENM2;BDNF;LINC02790;REV3L;GALNTL6;MFSD4B;SMG6
Host Interactions Of HIV Factors R-HSA-162909	17/130	0.0147938	0.999865	1.90264271127103	8.01687321379394	RANBP2;PSMD11;NUP188;HMGA1;AP2A1;HLA-A;RNASE1;PSMB6;PSMD7;NUP62;ELMO1;AP2S1;NUP54;FYN;AP1M2;RAN;NUP37
PMC7346436 F8	12/81	0.0151473	0.772861	2.19718477516888	9.20605130741502	NCOR2;SET;BHLHE41;PTEN;ABL1;MAPK1;ARFIP1;SLIT2;PKD2;PTPRG;CDON;DNM2
PMC9528698-NIHMS1835045-supplement-Supp Table 28 6.xlsx-TTN control-Gene TTN	21/172	0.0153715	0.999995	1.76005692080346	7.34865561216823	GABRB3;SLC12A2;CARMIL1;IQSEC1;PPM1H;PIGZ;FNBP1L;FOXO3;PLXDC2;KALRN;FOXO1;NPAS3;PARD3B;NFASC;NDUFAF6;RPS6KA2;KCNQ3;YPEL1;RARB;RAPGEF5;RIMKLB
ITGA9-ITGB1-SPP1 complex (human)	2/3	0.0154651	0.310075	25.1883072739633	105.014321269172	SPP1;ITGA9
Smooth muscle sarcoglycan complex SGC, beta-delta-zeta (mouse)	2/3	0.0154651	0.310075	25.1883072739633	105.014321269172	SGCD;SGCZ
Daxx-Axin-p53 complex (human)	2/3	0.0154651	0.310075	25.1883072739633	105.014321269172	DAXX;TP53
DNA ligase IV-XRCC4-PNK complex (human)	2/3	0.0154651	0.310075	25.1883072739633	105.014321269172	XRCC4;PNKP
RPA complex (human)	2/3	0.0154651	0.310075	25.1883072739633	105.014321269172	RPA1;RPA2
ELMO1-DOCK1-RAC1 complex (human)	2/3	0.0154651	0.310075	25.1883072739633	105.014321269172	ELMO1;DOCK1
ELMO1-DOCK1-CRKII complex (human)	2/3	0.0154651	0.310075	25.1883072739633	105.014321269172	ELMO1;DOCK1
ILK-PARVB-ARHGEF6 complex (human)	2/3	0.0154651	0.310075	25.1883072739633	105.014321269172	ILK;PARVB
Snurportin-CRM1-RanGTP complex (human)	2/3	0.0154651	0.310075	25.1883072739633	105.014321269172	SNUPN;RAN
Smrt-Sin3A-Hdac7 complex (mouse)	2/3	0.0154651	0.310075	25.1883072739633	105.014321269172	NCOR2;HDAC7
ITGAV-ITGB5-SPP1 complex (human)	2/3	0.0154651	0.310075	25.1883072739633	105.014321269172	ITGB5;SPP1
PDK2	2/3	0.0154651	0.684731	25.1883072739633	105.014321269172	PDHA2;PDHA1
PDP1	2/3	0.0154651	0.159806	25.1883072739633	105.014321269172	PDHA2;PDHA1
PDP2	2/3	0.0154651	0.159806	25.1883072739633	105.014321269172	PDHA2;PDHA1
Cottontail rabbit papillomavirus (strain Kansas)	2/3	0.0154651	0.231976	25.1883072739633	105.014321269172	MAGI1;DLG1
Vitamins A And D Action Mechanisms WP4342	2/3	0.0154651	0.963706	25.1883072739633	105.014321269172	RXRA;VDR
EPH-Ephrin Signaling R-HSA-2682334	13/91	0.0156932	0.999865	2.1060502283105	8.74964180036121	EPHA5;EPHA7;SDC2;AP2A1;RNASE1;KALRN;EFNB2;SDCBP;SYNGAP1;EFNB3;CLTCL1;AP2S1;FYN
Pneumonia	8/45	0.0158536	0.443355	2.72889954801218	11.309543581675	MAN1A2;AIFM2;ITGA1;UNC5C;MALRD1;HLA-A;TOX;RPAP3
ABC transporters	8/45	0.0158536	0.999995	2.72889954801218	11.309543581675	ABCC1;ABCG5;ABCD3;ABCB6;ABCB4;ABCA4;ABCG1;ABCG2
Age Of Smoking Initiation (MTAG)	15/111	0.0160938	0.443355	1.97520147462277	8.15623844359153	TENM2;BDNF;NTM;TMEM200C;ZBTB20;SORCS3;IQCJ;NPAS3;PCCA;REV3L;LINC01414;TERF2IP;TOX;MFSD4B;HCN1
PMC9528698-NIHMS1835045-supplement-Supp Table 44 15.Xlsx-Control TTN-Gene TTN	15/111	0.0160938	0.999995	1.97520147462277	8.15623844359153	NRP2;XRCC4;IQSEC1;HEG1;PLEK;PRKAG1;PRR5L;THBS1;IL4I1;EPB41L3;PIM1;SPP1;ATF5;FSIP1;EIF4G3
Sema3A-plexin repulsion signaling by inhibiting integrin adhesion	4/14	0.0161312	0.999939	5.04206943498979	20.808618787948	RRAS;SEMA3A;FYN;RND1
ODF1	4/14	0.0161312	0.954599	5.04206943498979	20.808618787948	PSMD11;PSMD7;PDCL;CCT5
PDIA5	4/14	0.0161312	0.954599	5.04206943498979	20.808618787948	CUTA;MUCL1;RNASET2;TRDN
Ascending Aorta Strain	4/14	0.0161312	0.443355	5.04206943498979	20.808618787948	CFDP1;KALRN;THSD4;SMG6
Tinnitus (Chronic, Bothersome)	4/14	0.0161312	0.443355	5.04206943498979	20.808618787948	CTU1;KRT4;APAF1;RASSF8
Nontraumatic Osteonecrosis Of The Femoral Head	4/14	0.0161312	0.443355	5.04206943498979	20.808618787948	RBFOX1;ZNF804B;SORCS2;SYN2
Mammographic Density (Non-Dense Area)	4/14	0.0161312	0.443355	5.04206943498979	20.808618787948	CSTF2T;PPARG;PRKG1;ZNF365
Logical Memory (Delayed Recall) In Normal Cognition	4/14	0.0161312	0.443355	5.04206943498979	20.808618787948	LINC02331;KCNE4;LRRTM4;PRKG1
F-small Fish Liking (Derived Food-Liking Factor)	4/14	0.0161312	0.443355	5.04206943498979	20.808618787948	KIRREL3;LRRTM4;POLR1HASP;CCDC171
F-fish Liking (Derived Food-Liking Factor)	4/14	0.0161312	0.443355	5.04206943498979	20.808618787948	KIRREL3;ZFHX3;LRRTM4;CCDC171
THUMPD3	5/21	0.0162011	0.954599	3.94052282016349	16.2455090754571	CTU2;CTU1;EFNB3;FXR2;ESRP1
CBWD3	5/21	0.0162011	0.954599	3.94052282016349	16.2455090754571	PRSS50;DNAJB11;CHRDL1;ART3;B4GALT4
Proteins Involved in Autistic Disorder and Aggression	5/21	0.0162011	0.984226	3.94052282016349	16.2455090754571	OXTR;BDNF;HGF;PTEN;MAPK1
Peptide Catabolic Process (GO:0043171)	5/21	0.0162011	0.965698	3.94052282016349	16.2455090754571	MME;CPQ;ECE1;TPP1;LTA4H
Dietary Macronutrient Intake (Multi-Trait Analysis)	5/21	0.0162011	0.443355	3.94052282016349	16.2455090754571	ZFHX3;APLF;RARB;CTNNA2;CCDC171
Cognitive Performance (Visuoconstruction) (Longitudinal)	5/21	0.0162011	0.443355	3.94052282016349	16.2455090754571	LINC02452;BPGM;FHDC1;THBS2;PARD3B
PMC2924916 F3	5/21	0.0162011	0.772861	3.94052282016349	16.2455090754571	DAXX;PTPRR;RRAS;BDNF;TRAF6
PMC7862665 F2	5/21	0.0162011	0.772861	3.94052282016349	16.2455090754571	TRAF6;PTEN;FYN;KBTBD7;ETV4
PMC3594312 F5	5/21	0.0162011	0.772861	3.94052282016349	16.2455090754571	TRAF3IP2;TRAF6;AHR;KLF4;BMPR1B
Regulation Of Lipid Metabolic Process (GO:0019216)	9/54	0.0162896	0.965698	2.52486338797814	10.3954373867991	DISP3;C1QTNF2;PSAPL1;ANGPTL8;PRKAG2;PPARG;CCDC3;ADIPOR1;PCK1
PMC5189935-pmed.1002201.s013.xlsx-HR HER2- Deletion-15Q24 2 ERBB2	26/227	0.0166135	0.999995	1.63823591097725	6.71273676099486	ANP32A;SPESP1;SNX33;PCSK6;HAPLN3;FBXO22;NR2E3;THSD4;ACAN;SV2B;CHSY1;UBE2Q2;IMP3;CIMAP1C;AEN;MYO9A;CORO2B;SNUPN;ISG20;SELENOS;NRG4;NOX5;CSPG4;SNRPA1;MFGE8;MCTP2
Sema4D-mediated inhibition of cell attachment and migration	3/8	0.0168548	0.999939	7.56	30.8683950584452	RRAS;ARHGAP35;RND1
Shuttle for transfer of acetyl groups from mitochondria to the cytosol	3/8	0.0168548	0.999939	7.56	30.8683950584452	SLC25A1;PDHA1;SLC25A11
Threonine-Type Peptidase Activity (GO:0070003)	3/8	0.0168548	0.804829	7.56	30.8683950584452	BACE1;PRSS50;GGT3P
Relative Carbohydrate Intake	3/8	0.0168548	0.443355	7.56	30.8683950584452	ZFHX3;RARB;CCDC171
Lamb Consumption	3/8	0.0168548	0.443355	7.56	30.8683950584452	KIRREL3;RBFOX1;CCDC171
Alpha-hydroxyisovalerate Levels In Elite Athletes	3/8	0.0168548	0.443355	7.56	30.8683950584452	CARMIL1;PTPRR;DYNLRB2-AS1
Alanine Levels In Elite Athletes	3/8	0.0168548	0.443355	7.56	30.8683950584452	ANGPT2;SCFD2;MCPH1
Body Mass Index In Physically Inactive Individuals	3/8	0.0168548	0.443355	7.56	30.8683950584452	DGKG;BDNF;RARB
Response To Cyclophosphamide In Systemic Lupus Erythematosus With Lupus Nephritis	3/8	0.0168548	0.443355	7.56	30.8683950584452	LINC02331;SCARB1;CAMK1D
Lipoprotein (A) - Cholesterol Levels	3/8	0.0168548	0.443355	7.56	30.8683950584452	SNX9;SERAC1;DSCAML1
Conotruncal Heart Defects With Normally Related Great Vessels	3/8	0.0168548	0.443355	7.56	30.8683950584452	NFASC;LAMC3;CORO2B
Human Milk Oligosaccharide Concentration (lacto-N-fucopentaose III) In Secretors	3/8	0.0168548	0.443355	7.56	30.8683950584452	OXTR;CAV3;FARS2
Descending Aorta Distensibility (MTAG)	3/8	0.0168548	0.443355	7.56	30.8683950584452	LRRC69;CFDP1;SMG6
Sulfur relay system	3/8	0.0168548	0.999995	7.56	30.8683950584452	CTU2;CTU1;MOCS2
Phenylalanine	3/8	0.0168548	0.910158	7.56	30.8683950584452	IL4I1;GOT1;FARS2
Pyruvate metabolism Homo sapiens P02772	3/8	0.0168548	0.995506	7.56	30.8683950584452	PDHA2;PDHA1;PCK1
PMC6349487 F3	3/8	0.0168548	0.772861	7.56	30.8683950584452	IRF3;TRAF6;TIRAP
PMC3139189 F2	3/8	0.0168548	0.772861	7.56	30.8683950584452	ILK;FYN;BMF
PMC3287012 F1	3/8	0.0168548	0.772861	7.56	30.8683950584452	HGF;CDC37;PTEN
PMC7082927 F1	3/8	0.0168548	0.772861	7.56	30.8683950584452	PTEN;PPARG;TP53
PMC7797784 F6	3/8	0.0168548	0.772861	7.56	30.8683950584452	KEAP1;GCLM;LDLR
PMC7247696 F1	3/8	0.0168548	0.772861	7.56	30.8683950584452	IRF3;TRAF6;TIRAP
PMC3673972 F10	3/8	0.0168548	0.772861	7.56	30.8683950584452	TRAF6;PTEN;TIRAP
PMC7952883 F3	3/8	0.0168548	0.772861	7.56	30.8683950584452	ABCC1;PKD2;ABCG2
PMC3860520 F3	3/8	0.0168548	0.772861	7.56	30.8683950584452	IRF3;TRAF6;TIRAP
PMC3890408 F2	3/8	0.0168548	0.772861	7.56	30.8683950584452	PTEN;MDM4;BMF
PMC4044302 F1	3/8	0.0168548	0.772861	7.56	30.8683950584452	FOXO3;LDLR;CYP7A1
PMC4532404 F7	3/8	0.0168548	0.772861	7.56	30.8683950584452	PTEN;ILK;FYN
PMC4713514 F5	3/8	0.0168548	0.772861	7.56	30.8683950584452	PTEN;ILK;FYN
PMC4831128 F6	3/8	0.0168548	0.772861	7.56	30.8683950584452	RXRA;PPARG;ABCG1
PMC5326762 F2	3/8	0.0168548	0.772861	7.56	30.8683950584452	KEAP1;ADM;EPOR
PMC5355173 F3	3/8	0.0168548	0.772861	7.56	30.8683950584452	PTEN;TP53;GLI3
PMC5407862 F1	3/8	0.0168548	0.772861	7.56	30.8683950584452	HGF;PTEN;MAPK1
PMC5476461 F4	3/8	0.0168548	0.772861	7.56	30.8683950584452	MTHFD1L;PSAT1;GCLM
PMC6057898 F3	3/8	0.0168548	0.772861	7.56	30.8683950584452	ACAN;COL2A1;NFIL3
PMC6209233 F10	3/8	0.0168548	0.772861	7.56	30.8683950584452	PTEN;ILK;FYN
Nef And Signal Transduction R-HSA-164944	3/8	0.0168548	0.999865	7.56	30.8683950584452	ELMO1;FYN;RNASE1
Negative Regulation Of Smooth Muscle Cell Proliferation (GO:0048662)	7/37	0.0169183	0.965698	2.94404274670305	12.0098032784463	BMP4;PTGIR;PTEN;IL12A;ANG;PPARG;PRKG1
Monoatomic Cation Transmembrane Transporter Activity (GO:0008324)	7/37	0.0169183	0.804829	2.94404274670305	12.0098032784463	SLC12A2;CALHM2;CHRNE;PIEZO2;PIEZO1;PKD2;TRPM3
Cardioembolic Stroke (MTAG)	7/37	0.0169183	0.443355	2.94404274670305	12.0098032784463	NCOR2;ZFHX3;POLR2A;TNFSF12;NEURL1;LINC01426;PPFIA4
PMC8291445-nwz006 Supplemental file.docx-5-PRPF4B PRPF4B	7/37	0.0169183	0.999995	2.94404274670305	12.0098032784463	RYR1;SCARB1;PTPRN;SEMA3A;SPEG;RYR3;RUNX1
Receptor-Mediated Endocytosis (GO:0006898)	16/122	0.0172441	0.965698	1.9083927947061	7.74861419597011	SCARB2;LMBR1L;MAGI2;SFTPD;M6PR;LDLRAD3;ADM;AP2A1;ARRB2;FNBP1L;CXCL16;DNM2;CLTCL1;AP2S1;SNX9;LDLR
PSMC4	6/29	0.0172885	0.954599	3.29047746065618	13.3518172562961	MYO1D;PSMD11;PSMD7;GPAM;ZFAND2B;TTF2
Carotid Intima Media Thickness	6/29	0.0172885	0.44886	3.29047746065618	13.3518172562961	CFDP1;PRAG1;LOXL4;LDLR;MCPH1;NEUROG3
PMC5302293 F1	6/29	0.0172885	0.772861	3.29047746065618	13.3518172562961	APAF1;XRCC4;CCNE2;PTEN;FOXO3;TP53
Regulation Of Neuron Projection Development (GO:0010975)	21/174	0.0173181	0.965698	1.73686058445417	7.04471023006054	SCARB2;NTNG1;CAMK1D;PRAG1;BDNF;SEMA3A;MAGI2;PTEN;ATP1B2;ARHGAP35;ADCY6;EFNB2;FUT9;RTN4RL1;CTNNA2;RTN4IP1;TOX;PAK3;PPFIA2;ZNF365;CDK5R1
Ubiquitin-Dependent ERAD Pathway (GO:0030433)	11/73	0.0173825	0.965698	2.24079917038083	9.08037727000051	DNAJB2;SELENOS;FBXO2;TMEM67;UFD1;FBXO6;MAN1A1;FBXO44;ANKZF1;MARCHF6;ECPAS
Trunk Fat Mass	8/46	0.0179887	0.462755	2.65694269804203	10.6756253864775	MARCHF1;SLC35F3;CADPS;ELMO1;ZC3H18;DLGAP1;THSD4;CCDC171
PMC5041507 F1	9/55	0.018243	0.772861	2.46984141126158	9.88917733085374	TRAF6;TP53INP1;PTEN;PIM1;ARID4B;FOXO3;TP53;FOXO1;EPOR
LGALS8	13/93	0.0185652	0.954599	2.05317636986301	8.18491503273105	SLC12A2;ABCC1;HEG1;ATG9A;ITGA1;ECE1;ADCY6;PTPRG;SDCBP;LRRC8A;CSPG4;EMB;ATP13A3
Gout	11/74	0.0191031	0.482568	2.20511150196513	8.72762494379396	CARMIL1;RBFOX1;UBE2Q2;VDR;HGF;PNPLA3;PRKAG2;RARB;PKD2;ABCG1;ABCG2
Optic Disc Size	11/74	0.0191031	0.482568	2.20511150196513	8.72762494379396	BMP4;VANGL1;BMP3;RBFOX1;LINC01376;PDZD2;WNT7B;RARB;KIF6;DCDC1;UBE2L3
PMC10247733-41408 2023 863 MOESM2 ESM.pdf-402-PRKD1 PRKD1	7/38	0.019458	0.999995	2.84891959688421	11.2233035262116	PRMT6;PRMT1;PRMT3;PRKG2;PRKD2;PRODH;PRKG1
Nephrin interactions	5/22	0.0197246	0.999939	3.70852700753326	14.5592640269127	KIRREL3;MAGI2;FYN;ACTN4;SPTAN1
Myocarditis, Acute Viral Overiew	5/22	0.0197246	0.984226	3.70852700753326	14.5592640269127	SGCD;ABL1;DMD;FYN;SGCG
Oligosaccharide Biosynthetic Process (GO:0009312)	5/22	0.0197246	0.965698	3.70852700753326	14.5592640269127	FUT9;B3GALT4;ST3GAL6;ST6GALNAC5;MPDU1
Heart Rate	5/22	0.0197246	0.492646	3.70852700753326	14.5592640269127	TMEM132D;RBFOX1;PDE11A;CPNE5;ACTN4
PMC5374451 F3	5/22	0.0197246	0.772861	3.70852700753326	14.5592640269127	BMP4;GDNF;SEMA3A;SLIT2;BMP7
PMC5683310 F2	5/22	0.0197246	0.772861	3.70852700753326	14.5592640269127	MYOG;FLG;MYBPH;PPARG;KLF4
Nephrin Family Interactions R-HSA-373753	5/22	0.0197246	0.999865	3.70852700753326	14.5592640269127	KIRREL3;MAGI2;FYN;ACTN4;SPTAN1
PMC6255815-41598 2018 35791 MOESM8 ESM.xlsx-???1-ABL1 ABL1	5/22	0.0197246	0.999995	3.70852700753326	14.5592640269127	TRAF6;MAPK1;FBXO6;ARRB2;TP53
PI3K AKT mTOR Vitamin D3 Signaling WP4141	5/22	0.0197246	0.963706	3.70852700753326	14.5592640269127	PDHA1;RXRA;VDR;CD80;IL12A
Whole Brain Free Water Diffusion (Multivariate Analysis)	16/124	0.0198534	0.492646	1.87284882686393	7.34040279040186	PLEKHG1;COL26A1;PRKAG2;FBLN1;ACTN4;AMPD3;FNBP1L;IQGAP2;KIF6;SMG6;SH3PXD2A;PCCA;DISC1;NBL1;SLC12A8;MCPH1
Retinoic acid receptor-mediated signaling	6/30	0.0203004	0.999939	3.15320381731425	12.2884011555461	RXRB;NCOR2;RXRA;VDR;MAPK1;RARB
PMC10243915-uxad037 Suppl Supplementary Table s1a.pdf-98-EIF2AK4 EIF2AK4	6/30	0.0203004	0.999995	3.15320381731425	12.2884011555461	LRFN2;PIM1;PRKD2;STX2;SCAF1;ELK3
ABC transporters	8/47	0.0203222	0.999939	2.58867594294215	10.0855915918264	ABCC1;ABCG5;ABCD3;ABCB6;ABCB4;ABCA4;ABCG1;ABCG2
PMC7299312-pgen.1008601.s017.xlsx-Normal DM DE association-Unnamed 10 DMPK	8/47	0.0203222	0.999995	2.58867594294215	10.0855915918264	ENDOU;SLC37A1;NOVA1;HPS1;TMCC2;DCPS;ARFGEF3;RUNX1
Peptide Metabolic Process (GO:0006518)	9/56	0.0203611	0.965698	2.41716079525637	9.41273142781397	BACE1;PCSK1;DNPEP;MME;CPQ;DMD;TPP1;LTA4H;GGT3P
11P11 2 Copy Number Variation Syndrome WP5348	9/56	0.0203611	0.963706	2.41716079525637	9.41273142781397	VANGL1;SDCBP;TSPAN18;CHST1;PRDM11;TP53;TP53I11;GLI3;B4GALT4
Cortical Thickness	41/401	0.0206691	0.492826	1.44484598075729	5.60472689647835	NRP2;LINC01376;RABGAP1;PKDCC;ITGB5;LAMC3;SEMA3A;PRKAG2;FOXO3;GLI3;THSD4;SMG6;EFNB2;PDZD2;CHSY1;LINC01968;RPS6KA2;A2M;SLC12A8;WWOX;EGLN3;PLEKHG1;MON2;RNLS;CADPS;SHROOM3;ACTN4;TMEM170A;KIF6;SND1;SH3RF3;BMP4;SPATA16;PCCA;PAX7;SLCO1A2;CD68;NBL1;LGR4;MCPH1;CCDC171
PARP1	4/15	0.0207395	0.954599	4.5834519462838	17.7641630943648	APLF;RPA2;WDR76;RNF166
CHRNA7 -> CREB Signaling	4/15	0.0207395	0.984226	4.5834519462838	17.7641630943648	CHRNA7;MAPK1;FYN;ADCY6
Dendritic Spine Morphogenesis (GO:0060997)	4/15	0.0207395	0.965698	4.5834519462838	17.7641630943648	DOCK10;PTEN;PAK3;ZNF365
Keratan Sulfate Biosynthetic Process (GO:0018146)	4/15	0.0207395	0.965698	4.5834519462838	17.7641630943648	CHST1;ST3GAL6;CHST5;B4GALT4
Regulation Of Amyloid Fibril Formation (GO:1905906)	4/15	0.0207395	0.965698	4.5834519462838	17.7641630943648	CHRNA7;IAPP;LDLR;PFDN6
Triglyceride Change In Response To Fenofibrate In Statin-Treated Type 2 Diabetes	4/15	0.0207395	0.492826	4.5834519462838	17.7641630943648	LINC01010;LINGO2;LRFN2;BCL9
Metastasis In Stage I-III Microsatellite Instability Low/Stable Colorectal Cancer (Time To Event)	4/15	0.0207395	0.492826	4.5834519462838	17.7641630943648	SGCD;POLR2A;SCFD2;HAPLN3
Glucagon Levels In Response To Oral Glucose Tolerance Test (Fasting)	4/15	0.0207395	0.492826	4.5834519462838	17.7641630943648	TIAM2;LINC02882;SLC35F3;MELTF
Parkinson's Disease Progression (Cognitive)	4/15	0.0207395	0.492826	4.5834519462838	17.7641630943648	WWOX;POLR2A;IQCJ;RYR3
PMC3629228 F2	4/15	0.0207395	0.772861	4.5834519462838	17.7641630943648	DAXX;PERP;PTEN;THBS1
PMC4948960 F6	4/15	0.0207395	0.772861	4.5834519462838	17.7641630943648	SCARB1;CLIP2;MEOX1;RUNX1
PMC6482944 F2	4/15	0.0207395	0.772861	4.5834519462838	17.7641630943648	BMP4;GDNF;PTEN;BMP7
PMC6610579 F3	4/15	0.0207395	0.772861	4.5834519462838	17.7641630943648	LAMC3;SPP1;PAK6;FOXO1
PMC5189935-pmed.1002201.s013.xlsx-HR HER2- Amplification-8Q21 3 ERBB2	4/15	0.0207395	0.999995	4.5834519462838	17.7641630943648	LRRC69;NECAB1;PIP4P2;OTUD6B
PMC4081098-supp Gku498 nar-02440-y-2013-File009.xlsx-Supp Table 6-Supplementary Table 6 List Of Ephrin Ligands And EPH Receptors Identified By Either The LIMMA Or Correlation Analysis EPHA1	4/15	0.0207395	0.999995	4.5834519462838	17.7641630943648	EPHA5;EFNB2;EPHA7;EFNB3
PMC6647091-13148 2019 697 MOESM5 ESM.xlsx-q 0 15 DM P 0 05 DE-UCSC RefGene Name DMPK	4/15	0.0207395	0.999995	4.5834519462838	17.7641630943648	ANKRD33B;PPP1R11;SLC39A7;PRDM11
OSX And miRNAs In Tooth Development WP3971	4/15	0.0207395	0.963706	4.5834519462838	17.7641630943648	ALPL;SOST;KLF4;BMP7
Axonogenesis (GO:0007409)	22/188	0.0208985	0.965698	1.67704034608454	6.48692200662955	EPHA5;NTNG1;DRAXIN;EPHA7;BDNF;SEMA3A;PTEN;UNC5C;KALRN;ARHGAP35;EFNB2;NELL1;NFASC;EFNB3;MAP1A;FYN;EMB;CTNNA2;SLIT2;PAK3;DSCAML1;CDK5R1
PMC9528698-NIHMS1835045-supplement-Supp Table 34 2.xlsx-TTN control-Gene TTN	33/310	0.0211055	0.999995	1.50985258724428	5.82534251823971	DOCK6;CCDC122;DOCK5;PRDM11;PKD2;KALRN;FGD5;RXRA;PDZD2;SH3PXD2A;RPS6KA2;STX2;ARGLU1;LDLR;TMPO;GABBR1;ZFHX3;PLEKHG1;IQSEC1;HEG1;IFFO2;CORO2B;SND1;PARD3B;NCOR2;SH3RF3;CDC42EP4;ZNF516;ELMO1;LNX1;DSCAML1;AHDC1;ITGA9
Focal Adhesion WP306	23/199	0.0211141	0.963706	1.65389106583072	6.38040815888035	CAV3;ITGB5;LAMC3;HGF;ITGA1;PTEN;ILK;EMP2;ACTN4;PARVB;THBS2;THBS1;ARHGAP35;FGR;COL2A1;SPP1;MYL10;PAK6;MAPK1;FYN;PAK3;DOCK1;ITGA9
ABL1 human kinase ARCHS4 coexpression	32/299	0.0213744	0.999996	1.51871229665209	5.8403032603259	KANK2;NUP188;CHPF;ITGB5;PRKCSH;WIZ;ECE1;SNX33;SLC1A5;ARHGAP35;STRN4;HK1;HIRA;SH3PXD2A;PIEZO1;SH3BP4;SLC39A7;ABCC1;MINK1;ACTN4;SCAF1;RAD23B;SENP3;SND1;HNRNPL;NCOR2;ILF3;COL5A1;KIFC1;AKT1S1;PRR12;MFGE8
EPHA4 human kinase ARCHS4 coexpression	32/299	0.0213744	0.999996	1.51871229665209	5.8403032603259	NECAB1;TENM4;TMEM200C;C2ORF66;KALRN;PTPRG;CAPN6;SV2B;FUT9;NDST4;CLVS2;DLGAP1;TP53BP1;CTNNA2;SLIT2;RIMKLB;SPTAN1;CDON;ANKS1B;ZNF365;MAGI1;RBFOX1;ANK2;SYN2;CORO2B;KBTBD6;NOVA1;MAP1A;FGF13;SDK2;CDK5R1;HCN1
Inhibition of THBS1 Activates Angiogenesis in Cancer	7/39	0.0222525	0.984226	2.75974164392906	10.5016509561906	APAF1;HGF;FYN;THBS2;THBS1;TP53;PRKG1
Synthesis Of PA R-HSA-1483166	7/39	0.0222525	0.999865	2.75974164392906	10.5016509561906	AGPAT5;GPAM;PRKCSH;ACP6;PLA2G2A;GPAT3;PLD2
LRRK2 activemutant 159 GSE36321	32/300	0.0222973	0.999964	1.51296259852714	5.75423284435428	TRAF3IP2;ITGB5;SDC2;BHLHE41;IFI6;KEAP1;BUB1B;ADM;FBLN1;IQGAP2;PCSK6;HK1;PSMB6;GLIPR1;DRAM1;FAM184A;SH3BP4;LMCD1;LDLR;EGLN3;DTNA;ECH1;ANXA11;DOLK;SYNJ2;BMP7;SLC25A15;COL5A1;ELMO1;UMPS;FGF13;NBL1
LRRK2 mutant 33 GDS4401	32/300	0.0222973	0.999964	1.51296259852714	5.75423284435428	TRAF3IP2;ITGB5;SDC2;BHLHE41;IFI6;KEAP1;BUB1B;ADM;FBLN1;IQGAP2;PCSK6;HK1;PSMB6;GLIPR1;DRAM1;FAM184A;SH3BP4;LMCD1;LDLR;EGLN3;DTNA;ECH1;ANXA11;DOLK;SYNJ2;BMP7;SLC25A15;COL5A1;ELMO1;UMPS;FGF13;NBL1
RNA Catabolic Process (GO:0006401)	9/57	0.0226509	0.965698	2.36667520491803	8.96391610113837	SUPV3L1;ISG20;LSM6;RNASET2;PPP1R8;RNASE6;RNASE2;EXOSC2;SND1
Vertex-wise Cortical Surface Area	43/427	0.0228381	0.523906	1.42072588869464	5.36938538585241	LINC01376;STEAP1B;PKDCC;ITGB5;LAMC3;PRKAG2;FNBP1L;IQGAP2;FOXO3;GLI3;THSD4;ELK3;SMG6;EFNB2;PDZD2;SCFD2;SLC12A8;WWOX;PLEKHG1;MON2;ZFHX3;RNLS;CADPS;NOSIP;SHROOM3;ACTN4;RAD23B;KIF6;SND1;PARD3B;SH3RF3;SPATA16;ARHGAP31;COL2A1;PCCA;PAX7;KIF26B;PRKD2;CCDC3;ATXN10;MCTP2;NBL1;MCPH1
COVID-19 (Covid Respiratory Support Vs Population)	8/48	0.0228627	0.523906	2.52382252559727	9.5356294237454	NCOR2;NFASC;SV2C;NTM;PPM1H;PIEZO2;PAK6;MALRD1
Testosterone Levels	21/179	0.0230304	0.523906	1.68143895805001	6.34060511157271	PRMT6;MBNL1;PGAP1;DNAH2;TNFSF12;MCM9;ANK2;SENP3;WDR76;ADCY6;EFNB3;FXR2;NPEPL1;SH3PXD2A;POLR2A;MAP1A;DLGAP1;SHBG;TP53;MPDU1;WRAP53
PMC4304881-MOL2-9-527-s010.xls-Sheet2-PLK1 PLK1	15/116	0.0231956	0.999995	1.87690991321354	7.06429690460661	WNT7B;BUB1B;SNX33;PLXDC2;AMOT;RRP9;PLD2;TUBA1B;PDCD11;GRPEL1;MTHFD1L;SNRPA1;ECT2;CCT5;RAN
Vitamine D Deficite and Dentin Formation	6/31	0.0236491	0.984226	3.02691206543967	11.334057447726	NCOR2;VDR;SPP1;MAPK1;ALPL;RAPGEF3
Antiviral And Anti Inflammatory Effects Of Nrf2 On SARS CoV 2 Pathway WP5113	6/31	0.0236491	0.995023	3.02691206543967	11.334057447726	RXRA;IRF3;KEAP1;PRKG2;IL12A;GCLM
Regulation Of Myotube Differentiation (GO:0010830)	5/23	0.0237147	0.965698	3.5023085074175	13.1044475902197	MYOG;BDNF;BHLHE41;PIEZO1;FBXO22
Primary Sclerosing Cholangitis	5/23	0.0237147	0.523906	3.5023085074175	13.1044475902197	CRAT37;MME;PRKD2;UBASH3A;HDAC7
PMC2785769 F7	5/23	0.0237147	0.772861	3.5023085074175	13.1044475902197	HMGA1;SPP1;CHST1;RAN;CCR2
PMC4041745 F5	5/23	0.0237147	0.772861	3.5023085074175	13.1044475902197	PTEN;ILK;MAPK1;DOCK1;EIF4G3
PMC5189935-pmed.1002201.s013.xlsx-HR HER2- Deletion-3P14 3 ERBB2	92/1019	0.0237781	0.999995	1.26481521840169	4.72913414436439	DGKG;CEP15;OXTR;RTP3;POGLUT1;ITGB5;ACY1;RPL32;SCHIP1;CD80;OR5K2;PIGZ;ZBTB20;CPOX;GPR62;OSBPL11;LRRC2;PTPRG;RRP9;GOLGA4;UPK1B;SENP5;TMEM44;MUC13;IL12A;FEZF2;LMCD1;SLC12A8;TIMP4;CCR2;MAGI1;MBNL1;PARP3;TBCCD1;MME;NCBP2;AHSG;HEG1;SSUH2;ABHD14A;CRIPTO;IQCF1;SYN2;IQCJ;GRIP2;DUSP7;SPATA16;LSG1;DNAJB11;ADPRH;FETUB;RARB;C3ORF20;PPARG;RPL29;UMPS;ROPN1;B4GALT4;ITGA9;LTF;CLDND1;KALRN;CAND2;SNX4;FGD5;ALS2CL;P…
Cycling of Ran in nucleocytoplasmic transport Homo sapiens h ranPathway	3/9	0.0239158	0.948896	6.29965986394558	23.5179812444523	RANBP2;NUP62;RAN
AngiopoietinR -> FOXO Signaling	3/9	0.0239158	0.984226	6.29965986394558	23.5179812444523	ANGPT2;FOXO3;FOXO1
Cellular Response To Purine-Containing Compound (GO:0071415)	3/9	0.0239158	0.965698	6.29965986394558	23.5179812444523	RYR1;CASQ2;RYR3
Negative Regulation Of Cell-Cell Adhesion Mediated By Cadherin (GO:2000048)	3/9	0.0239158	0.965698	6.29965986394558	23.5179812444523	MAD2L2;RGCC;PPM1F
Regulation Of Protein Localization To Centrosome (GO:1904779)	3/9	0.0239158	0.965698	6.29965986394558	23.5179812444523	UBXN2B;NUP62;BICD1
G-rich Strand Telomeric DNA Binding (GO:0098505)	3/9	0.0239158	0.982896	6.29965986394558	23.5179812444523	RPA1;RPA2;TERF2IP
Urinary Microalbumin Levels	3/9	0.0239158	0.523906	6.29965986394558	23.5179812444523	MON2;TIMMDC1;PPM1H
Alanine Aminotransferase Levels In Non-Alcoholic Fatty Liver Disease	3/9	0.0239158	0.523906	6.29965986394558	23.5179812444523	PNPLA3;DISC1;RESF1
RBC Levels Of 11-HETE.1	3/9	0.0239158	0.523906	6.29965986394558	23.5179812444523	WWOX;DDX25;PIEZO1
Heart Rate Response To Beta Blockers (Atenolol Add-On Therapy)	3/9	0.0239158	0.523906	6.29965986394558	23.5179812444523	GABRB3;EGLN3;MARCHF1
Vaginal Microbiome Relative Abundance (S Dialister Micraerophilus)	3/9	0.0239158	0.523906	6.29965986394558	23.5179812444523	KIRREL3;RARB;DYNLRB2-AS1
Maximum Measurement Of Hepatic Fat	3/9	0.0239158	0.523906	6.29965986394558	23.5179812444523	SAMM50;PNPLA3;PARVB
PMC2440498 F1	3/9	0.0239158	0.772861	6.29965986394558	23.5179812444523	IRF3;TRAF6;TIRAP
PMC6895808 F1	3/9	0.0239158	0.772861	6.29965986394558	23.5179812444523	PTEN;PPARG;TP53
PMC2709856 F1	3/9	0.0239158	0.772861	6.29965986394558	23.5179812444523	IRF3;TRAF6;TIRAP
PMC2739756 F4	3/9	0.0239158	0.772861	6.29965986394558	23.5179812444523	VDR;HGF;CYP7A1
PMC2783241 F2	3/9	0.0239158	0.772861	6.29965986394558	23.5179812444523	BMP4;GDNF;HGF
PMC7090203 F2	3/9	0.0239158	0.772861	6.29965986394558	23.5179812444523	IRF3;TRAF6;TIRAP
PMC3103528 F5	3/9	0.0239158	0.772861	6.29965986394558	23.5179812444523	BMP3;DAXX;THBS1
PMC6971376 F4	3/9	0.0239158	0.772861	6.29965986394558	23.5179812444523	PTEN;DOCK1;FOXO1
PMC7666984 F1	3/9	0.0239158	0.772861	6.29965986394558	23.5179812444523	IRF3;TRAF6;TIRAP
PMC6990114 F3	3/9	0.0239158	0.772861	6.29965986394558	23.5179812444523	IRF3;FOXO3;FOXO1
PMC7392626 F2	3/9	0.0239158	0.772861	6.29965986394558	23.5179812444523	IRF3;CD80;RAE1
PMC3290818 F1	3/9	0.0239158	0.772861	6.29965986394558	23.5179812444523	IRF3;TRAF6;TIRAP
PMC7019324 F6	3/9	0.0239158	0.772861	6.29965986394558	23.5179812444523	IRF3;TRAF6;TIRAP
PMC3425429 F1	3/9	0.0239158	0.772861	6.29965986394558	23.5179812444523	HGF;PTEN;FOXO1
PMC3645912 F1	3/9	0.0239158	0.772861	6.29965986394558	23.5179812444523	CD80;AHR;FOXO3
PMC3653888 F4	3/9	0.0239158	0.772861	6.29965986394558	23.5179812444523	RXRB;VDR;PPARG
PMC3899934 F2	3/9	0.0239158	0.772861	6.29965986394558	23.5179812444523	ABCG5;LDLR;CYP7A1
PMC4703580 F1	3/9	0.0239158	0.772861	6.29965986394558	23.5179812444523	TRAF6;FOXO1;TIRAP
PMC4918253 F1	3/9	0.0239158	0.772861	6.29965986394558	23.5179812444523	IRF3;TRAF6;TIRAP
PMC4981436 F4	3/9	0.0239158	0.772861	6.29965986394558	23.5179812444523	RXRA;RARB;PPARG
PMC5482964 F3	3/9	0.0239158	0.772861	6.29965986394558	23.5179812444523	IRF3;TRAF6;TIRAP
PMC5679442 F1	3/9	0.0239158	0.772861	6.29965986394558	23.5179812444523	BMP4;HGF;BMP7
PMC5713305 F2	3/9	0.0239158	0.772861	6.29965986394558	23.5179812444523	RXRA;KEAP1;GCLM
PMC5925582 F7	3/9	0.0239158	0.772861	6.29965986394558	23.5179812444523	IRF3;TRAF6;TIRAP
PMC5975105 F1	3/9	0.0239158	0.772861	6.29965986394558	23.5179812444523	OSBPL6;LDLR;ABCG1
PMC6059364 F2	3/9	0.0239158	0.772861	6.29965986394558	23.5179812444523	PTEN;KLF4;TP53
PMC6752947 F6	3/9	0.0239158	0.772861	6.29965986394558	23.5179812444523	MYOG;PAX7;HGF
PMC6862675 F4	3/9	0.0239158	0.772861	6.29965986394558	23.5179812444523	IFI6;ADM;FYN
Carbohydrate metabolism	26/235	0.0246212	0.999939	1.57484053792205	5.83343993667192	SLC25A1;HPSE2;CHPF;NUP188;SDC2;ENO3;HK1;ACAN;CHSY1;NDST4;NUP62;ST3GAL6;PCK1;RAE1;RANBP2;GOT1;LYVE1;HS3ST4;HS3ST2;CHST1;CSPG4;NUP54;CHST5;SLC25A11;B4GALT4;NUP37
PMC9528698-NIHMS1835045-supplement-Supp Table 30.xlsx-TTN control-Gene TTN	44/441	0.0247329	0.999995	1.40613735274884	5.20217558123716	DOCK6;SCARB1;DOCK5;WWC1;PELI2;PIGZ;PRDM11;MLLT3;PKD2;KALRN;GLI3;FGD5;PDZD2;SH3PXD2A;RPS6KA2;EPB41L3;SLIT3;STX2;LDLR;TMPO;NTNG1;CARMIL1;PLEKHG1;GABBR1;ZFHX3;LRRN2;IQSEC1;HEG1;IFFO2;EBF4;PARVB;ELL2;CORO2B;PARD3B;NCOR2;SH3RF3;CDC42EP4;ZNF516;YPEL1;ELMO1;LNX1;DSCAML1;AHDC1;ITGA9
Free Cholesterol To Total Lipids Ratio In Very Large HDL	9/58	0.0251189	0.54597	2.31825025092004	8.54074364695422	DOCK6;SCARB1;GPAM;ANGPTL8;PNPLA3;SYN2;CD300LG;SLC12A8;UBE2L3
Human alphaherpesvirus 1 DNA replication origin-binding helicase (gene: UL9)	9/58	0.0251189	0.998493	2.31825025092004	8.54074364695422	EIF4A1;ABCB4;UBD;DDX23;ARRB2;STX2;RAD23B;TP53;EIF4G3
Dendritic Spine Morphogenesis and Stabilization	7/40	0.0253124	0.984226	2.67596841539543	9.83809006977427	SYNGAP1;BDNF;DCX;PAK3;KALRN;SPTAN1;GRIP2
Trauma Exposure	7/40	0.0253124	0.54597	2.67596841539543	9.83809006977427	LINGO2;NRP2;TENM2;ZFHX3;SGCD;SORCS3;NPAS3
PMC4023701 F5	7/40	0.0253124	0.772861	2.67596841539543	9.83809006977427	MME;CALD1;SDC2;ITGA1;SPP1;SLIT3;SLIT2
PMC9744938-DataSheet1.PDF-2-MAPK3 MAPK3	7/40	0.0253124	0.999995	2.67596841539543	9.83809006977427	ELF1;GRM4;DUSP3;UBASH3A;NKX2-3;DUSP7;CDK5R1
Axon Guidance (GO:0007411)	18/149	0.0259165	0.965698	1.73724718659007	6.34594862100569	EPHA5;DRAXIN;EPHA7;BDNF;SEMA3A;UNC5C;KALRN;ARHGAP35;EFNB2;NELL1;NFASC;EFNB3;GDNF;FYN;EMB;SLIT2;DSCAML1;CDK5R1
DNA-PK pathway in nonhomologous end joining	4/16	0.0260764	0.999939	4.20127070569548	15.3208821666768	XRCC4;PNKP;APLF;APTX
CELA1	4/16	0.0260764	0.954599	4.20127070569548	15.3208821666768	CEP164;SIPA1L2;DISC1;GLI3
HSPA2	4/16	0.0260764	0.954599	4.20127070569548	15.3208821666768	ILK;PRODH;FOXRED1;THSD4
Gluconeogenesis Impairment in non-Alcoholic Fatty Liver Disease	4/16	0.0260764	0.984226	4.20127070569548	15.3208821666768	PPARG;PCK1;LDLR;FOXO1
Tamoxifen Induced Endometrial Cancer	4/16	0.0260764	0.984226	4.20127070569548	15.3208821666768	PTEN;ILK;FOXO3;TP53
Establishment Of Protein Localization To Endoplasmic Reticulum (GO:0072599)	4/16	0.0260764	0.965698	4.20127070569548	15.3208821666768	ZFAND2B;SRPRA;MAN1A1;SRP14
Bitter Beverage Consumption	4/16	0.0260764	0.54976	4.20127070569548	15.3208821666768	CYP2A6;MAGI2;AHR;ABCG2
Depression (Age Of Onset)	4/16	0.0260764	0.54976	4.20127070569548	15.3208821666768	SH3PXD2A;RPS6KA2;SGCZ;FARS2
Alcohol Dependence (Codominant Genetic Model)	4/16	0.0260764	0.54976	4.20127070569548	15.3208821666768	RBFOX1;LINC01470;TRAPPC12;LINC01036
DNA-PK pathway in nonhomologous end joining Homo sapiens 8dc10ede-6191-11e5-8ac5-06603eb7f303	4/16	0.0260764	0.991991	4.20127070569548	15.3208821666768	XRCC4;PNKP;APLF;APTX
PMC7917964 F10	4/16	0.0260764	0.772861	4.20127070569548	15.3208821666768	VDR;PPARG;AHR;TP53
PMC8014416 F6	4/16	0.0260764	0.772861	4.20127070569548	15.3208821666768	DAXX;RXRA;PTEN;THSD4
PMC4377021 F5	4/16	0.0260764	0.772861	4.20127070569548	15.3208821666768	ITGB5;SDC2;SPP1;HTATIP2
PMC6861914 F6	4/16	0.0260764	0.772861	4.20127070569548	15.3208821666768	APAF1;AIFM2;PERP;PTEN
Human adenovirus 2	4/16	0.0260764	0.260764	4.20127070569548	15.3208821666768	MAD2L2;DAXX;TP53;RAN
Axon guidance	21/182	0.0270936	0.999995	1.6498383039885	5.95337273638158	EPHA5;NTNG1;EPHA7;SEMA3A;LRRC4;ILK;UNC5C;BMP7;RND1;EFNB2;PPP3R1;EFNB3;RRAS;ABL1;MAPK1;PAK6;FYN;SLIT3;SLIT2;BMPR1B;PAK3
Lifetime Smoking	11/78	0.0272604	0.568665	2.07301386365028	7.4676618647335	TENM2;ZFHX3;BDNF;NTM;LINC02790;REV3L;RARB;GALNTL6;SORCS3;MFSD4B;SMG6
Beta-Tubulin Binding (GO:0048487)	6/32	0.0273486	0.982896	2.9103350637093	10.4745626200904	GABARAPL2;VAPB;FGF13;CCT5;LRPPRC;CDK5R1
Thrombin Signaling Thru Proteinase Activated Receptors (PARs) R-HSA-456926	6/32	0.0273486	0.999865	2.9103350637093	10.4745626200904	GNG10;GNG8;MAPK1;ARRB2;TTF2;F2RL2
PMC4640865-pone.0142693.s006.docx-0-PIK3CB PIK3CB	6/32	0.0273486	0.999995	2.9103350637093	10.4745626200904	EPHA5;ITGB5;ITGA1;PRKAG2;KALRN;DOCK1
R-warfarin Levels	13/98	0.0274621	0.568665	1.93187751813054	6.94499780302524	ICMT;ANK2;DISC1FP1;IQGAP2;SGCZ;TDRD3;FARS2;EDAR;ELMO1;PRKG2;RARB;GALNTL6;BMPR1B
ECM-receptor interaction	12/88	0.027536	0.999995	1.99405598184373	7.16316949549158	COL2A1;SV2C;ITGB5;SV2B;LAMC3;ITGA1;SPP1;GP1BA;COL9A3;THBS2;THBS1;ITGA9
PMC9528698-NIHMS1835045-supplement-Supp Table 21 3.Xlsx-Control TTN-Gene TTN	28/260	0.0277648	0.999995	1.52803961341129	5.47647352677595	DGKG;EIF4A1;PGAP1;ANKRD33B;SEMA3A;FBLN1;THBS2;THBS1;CYB5D1;SH3PXD2A;MTHFD1L;NFIL3;CHSY1;TMEM88;PIM1;SLIT3;DISC1;LDLR;ABCF1;KDM6B;PTGIR;PLA2G2A;RUNX1;NCOR2;COL5A1;NOVA1;CDC42EP4;GCLM
Free Cholesterol Levels In Very Large HDL	9/59	0.0277717	0.568665	2.27176229508197	8.14140136313494	SCARB1;CARMIL1;ABCG5;GPAM;PDE3A;PPARG;TP53BP1;SBF2;CD300LG
Smoking Initiation (Ever Regular Vs Never Regular)	27/249	0.0280517	0.568665	1.53961534148256	5.50213521221451	TENM2;THSD7B;NTM;ZBTB20;CHD3;FOXO3;NOL4;PTPRG;SMG6;ZNF407;REV3L;ZNF207;CTNNA2;MFSD4B;RBFOX1;GABBR1;ZFHX3;BDNF;LINC02790;MAGI2;ZNF804B;SORCS3;PCCA;ADGRB3;LINC01414;TERF2IP;TOX
Chronic Obstructive Pulmonary Disease Liability (Machine Learning-Based Score)	27/249	0.0280517	0.568665	1.53961534148256	5.50213521221451	NRP2;TENM4;SDC2;NTM;PRDM11;THSD4;SMG6;NPAS3;DOCK10;SH3PXD2A;FAM184A;CALD1;PIEZO1;TEKT5;WWOX;RBFOX1;SLC10A7;TNFSF12;SFTPD;ITGA1;AMPD3;DNM2;BMP4;BCL9;CFDP1;NOVA1;RARB
Synaptic Potentiation by PKMZ in LTP Maintenance - Active State	5/24	0.0281899	0.984226	3.31779721784024	11.8405274894503	EPHA5;EFNB2;IQSEC1;WWC1;GRIP2
Amyloid beta Traffic and Degradation in Extracellular Matrix in Alzheimer's Disease	5/24	0.0281899	0.984226	3.31779721784024	11.8405274894503	BACE1;MME;CHRNA7;ECE1;A2M
Lipid Translocation (GO:0034204)	5/24	0.0281899	0.965698	3.31779721784024	11.8405274894503	ABCC1;ABCB4;ABCA4;ATP10B;SLC52A1
Depression Severity X Hours Spent Watching Television Interaction	5/24	0.0281899	0.568665	3.31779721784024	11.8405274894503	RBFOX1;EGLN3;SGCD;USP31;CD80
RXR and RAR heterodimerization with other nuclear receptor Homo sapiens 6ce0a11e-6195-11e5-8ac5-06603eb7f303	5/24	0.0281899	0.991991	3.31779721784024	11.8405274894503	NCOR2;RXRA;VDR;RARB;PPARG
PMC3778921 F4	5/24	0.0281899	0.772861	3.31779721784024	11.8405274894503	KDM6B;BCL2L12;PERP;MDM4;TP53
RHO GTPases Activate NADPH Oxidases R-HSA-5668599	5/24	0.0281899	0.999865	3.31779721784024	11.8405274894503	PDZD2;NOX3;MAPK1;CYBA;RNASE1
U251 Nuclear N2 30609389	20/172	0.0283425	0.999943	1.66398014996197	5.92941209150998	RANBP2;ZFHX3;PHF1;HMGA1;AKAP8;WIZ;PRDM11;RRP9;SMU1;NFIL3;POLR2A;FIP1L1;MFAP1;TRIM39;ZC3H18;NUP54;ZNF148;RAE1;RAD18;TMPO
PMC9538189-Table2.DOCX-0-KIT KIT	21/183	0.0285622	0.999995	1.63956484032242	5.8297514475163	SLC25A1;CYB5A;OXTR;ENDOG;SET;VDR;ANXA11;ACTN4;EIF2AK4;SORCS2;RYR3;CXCL16;HK1;DNM2;BMP4;LYRM4;TP53INP1;PDE4A;NEFL;FYN;ABCG2
Negative Regulation Of Cell Projection Organization (GO:0031345)	8/50	0.0285977	0.965698	2.40338046481391	8.54264792410915	EFNB2;PRAG1;RTN4RL1;SEMA3A;PTEN;FYN;ADCY6;ZNF365
Positive Regulation Of Ossification (GO:0045778)	7/41	0.028648	0.965698	2.59712302383436	9.22672745193397	RXRB;BMP4;NELL1;PKDCC;RXRA;BMPR1B;BMP7
Stem Cell Differentiation (GO:0048863)	7/41	0.028648	0.965698	2.59712302383436	9.22672745193397	LMBR1L;UFL1;PSMD11;MLLT3;MEOX1;TP53;ELL3
PMC3702285-cddis2013211x6.pdf-225-GSK3A GSK3A	7/41	0.028648	0.999995	2.59712302383436	9.22672745193397	EIF4A1;ABCB6;MME;EIPR1;RPL22;RPP21;IAPP
IRF3-CBP complex (human)	2/4	0.0294232	0.395381	12.5934738273283	44.4042257083095	CITED1;IRF3
Skeletal muscle sarcoglycan complex SGC, alpha-beta-gamma-delta (mouse)	2/4	0.0294232	0.395381	12.5934738273283	44.4042257083095	SGCD;SGCG
Skeletal muscle sarcoglycan complex SGC, epsilon-beta-gamma-delta (mouse)	2/4	0.0294232	0.395381	12.5934738273283	44.4042257083095	SGCD;SGCG
Pax7-HMT complex (mouse)	2/4	0.0294232	0.395381	12.5934738273283	44.4042257083095	PAX7;WDR5
Polycomb repressive complex (human)	2/4	0.0294232	0.395381	12.5934738273283	44.4042257083095	PHC1;RING1
DAXX-Axin-p53-HIPK2 complex (human)	2/4	0.0294232	0.395381	12.5934738273283	44.4042257083095	DAXX;TP53
EPHB2	2/4	0.0294232	0.684731	12.5934738273283	44.4042257083095	EFNB2;RRAS
Cortical Surface Area	49/506	0.0299858	0.592446	1.36059240773978	4.77163799460219	ITGB5;TMEM167A;LAMC3;WWC1;PRKAG2;FNBP1L;GLI3;ELK3;SMG6;UBE2L3;SLC12A8;PLEKHG1;NOSIP;SHROOM3;UNC5C;ACTN4;RAD23B;KIF6;PARD3B;SPATA16;COL2A1;PCCA;PAX7;PRKD2;MCTP2;NBL1;MCPH1;LINC01376;PKDCC;IQGAP2;FOXO3;THSD4;EFNB2;PDZD2;SCFD2;LINC02331;LRRC69;WWOX;ZFHX3;RNLS;CADPS;PLXDC2;SH3RF3;ARHGAP31;KIF26B;PDE3A;CCDC3;ATXN10;FSIP1
PMC6251785-mmc5.xls-DM-ID DMPK	72/784	0.0303627	0.999995	1.28587926761783	4.49355670539075	SLC25A1;ZMYND15;DGKG;RYR1;MTCH1;MOCS2;ANKRD33B;SLC44A2;WWC1;DIRAS2;PIGZ;PRKAG2;ZBTB20;CHD3;OSBPL11;AMOT;ENDOU;PPIP5K1;RASSF4;RPS6KA2;PHYHD1;KIF1C;PDE4A;ZNF483;PARP3;MME;SFTPD;MINK1;SORCS3;SHISA9;SORCS2;TUBA4A;DUSP7;PCCA;CHST1;DOCK1;NECAB1;ANKRD55;CHRNA7;ATP10B;FBXO44;KALRN;THSD4;DNAJB2;ASIC4;PDZD2;TESPA1;CLTCL1;LRRC8A;CAMTA2;LINGO2;EGLN3;COL26A1;GOT1;SNAI3;FHDC1;LHFPL1;MYO9A;LYVE1;EPOR;HS3ST2;NEL…
Glycosaminoglycan Metabolism R-HSA-1630316	15/120	0.0303932	0.999865	1.80501665686851	6.30589367696052	CHPF;HPSE2;SDC2;HS3ST4;LYVE1;HS3ST2;ACAN;CHSY1;GLB1L;NDST4;CHST1;ST3GAL6;CSPG4;CHST5;B4GALT4
RAGE pathway	9/60	0.0306153	0.999939	2.22709739633558	7.76423324967647	BACE1;BMP4;ANGPT2;CYBA;MFGE8;F3;LDLR;BMP7;ABCG1
Glycosaminoglycan metabolism	14/110	0.0311706	0.999939	1.84225782499429	6.38946763288481	CHPF;HPSE2;SDC2;HS3ST4;LYVE1;HS3ST2;ACAN;CHSY1;NDST4;CHST1;ST3GAL6;CSPG4;CHST5;B4GALT4
PMC6962646-mmc2.xlsx-StemCell Genesets 2018-CDK1 CDK1	14/110	0.0311706	0.999995	1.84225782499429	6.38946763288481	KANK2;OXTR;HGF;AKAP8;THBS1;VPREB1;SELENOS;ESRP1;TMCC2;MAN1A1;FGF13;S1PR5;ABCG2;CCR2
NEK1	79/871	0.0312278	0.99952	1.26902544092286	4.39901053280117	ARF3;BCAR3;SCARB2;OGFR;DOCK5;SLC44A2;PLEK;CPOX;ILK;ECE1;ARHGAP35;DOCK10;TUBA1B;PPIP5K1;SH3PXD2A;PTTG1;ZNF407;SPEG;SBF2;TGM3;PRKG1;MAP4K1;RING1;MINK1;SHROOM3;NOSIP;ANK2;SENP3;TUBA4A;TIRAP;ELF1;CDC42EP4;MAP1A;KCNQ3;TERF2IP;SNRPA1;PRR12;TP53;MCPH1;PELI2;PRR5L;PLD2;HDAC7;EFNB2;NUAK2;RRAS;PAK6;LRRC8A;TP53BP1;ECT2;AP1M2;SLC12A2;RANBP2;GPR15;OSBPL6;DTNA;XRCC4;VDR;EYA3;RPA1;MYBPH;RASSF8;RPA2;EIF2AK4;PARV…
Dentin Formation Disruption	6/33	0.0314109	0.984226	2.80239339544043	9.6979598658174	BMP4;EDAR;TRAF6;SPP1;MAPK1;BMP7
Negative Regulation Of Epithelial Cell Migration (GO:0010633)	6/33	0.0314109	0.965698	2.80239339544043	9.6979598658174	PTPRR;PTEN;SLIT2;ADIPOR1;THBS1;PTPRG
Pulmonary Function (Smoking Interaction)	6/33	0.0314109	0.592446	2.80239339544043	9.6979598658174	WWOX;CFDP1;MOG;ITGA1;RARB;THSD4
PMC7443001 F3	6/33	0.0314109	0.772861	2.80239339544043	9.6979598658174	ELK4;DAXX;TRAF6;MAPK1;ARRB2;TP53
PMC5526991 F5	6/33	0.0314109	0.772861	2.80239339544043	9.6979598658174	LAMC3;PTEN;SPP1;COL9A3;THBS2;THBS1
Keratan Sulfate/Keratin Metabolism R-HSA-1638074	6/33	0.0314109	0.999865	2.80239339544043	9.6979598658174	ACAN;GLB1L;CHST1;ST3GAL6;CHST5;B4GALT4
Signaling events mediated by HDAC class I	10/70	0.0317192	0.999939	2.10378218272955	7.25980223329161	NCOR2;RANBP2;NUP62;PPARG;CHD3;HDAC8;ZFPM1;SIRT2;RAN;HDAC7
Regulation Of Substrate Adhesion-Dependent Cell Spreading (GO:1900024)	8/51	0.0318074	0.965698	2.34736090165886	8.09383573744879	DOCK5;CARMIL1;NELL1;ILK;FBLN1;ACTN4;MELTF;DOCK1
Ischemic Stroke	8/51	0.0318074	0.592446	2.34736090165886	8.09383573744879	ILF3;ZFHX3;MARCHF1;SH3PXD2A;PDE3A;CHD3;PTPRG;DNM2
Bile secretion	12/90	0.0321412	0.999995	1.94271573737693	6.67831107632995	SCARB1;ABCG5;RXRA;NCEH1;ABCB4;UGT2B15;SLCO1A2;ATP1B2;CYP7A1;LDLR;ADCY6;ABCG2
Chaperonin-mediated Protein Folding R-HSA-390466	12/90	0.0321412	0.999865	1.94271573737693	6.67831107632995	NOP56;TUBA1B;GNG10;CCNE2;PDCL;GNG8;FBXO6;TP53;TUBA4A;PFDN6;CCT5;WRAP53
LIG3	4/17	0.032162	0.954599	3.87788657904383	13.3281745165122	APLF;RPA2;WDR76;RNF166
RGPD8	4/17	0.032162	0.954599	3.87788657904383	13.3281745165122	TSKS;TSNAX;ESRP1;RAN
CHRNA7 -> NOS1 Production	4/17	0.032162	0.984226	3.87788657904383	13.3281745165122	CHRNA7;MAPK1;FYN;ADCY6
Dexamethasone Induced Neurotoxicity	4/17	0.032162	0.984226	3.87788657904383	13.3281745165122	TUBA1B;SOST;TP53;SIRT2
PI3K/AKT/MTOR Signaling Activation in Cancer	4/17	0.032162	0.984226	3.87788657904383	13.3281745165122	PTEN;FOXO3;TP53;FOXO1
Carbohydrate Derivative Catabolic Process (GO:1901136)	4/17	0.032162	0.965698	3.87788657904383	13.3281745165122	FBXO2;FBXO6;BPGM;FBXO44
Keratan Sulfate Metabolic Process (GO:0042339)	4/17	0.032162	0.965698	3.87788657904383	13.3281745165122	CHST1;ST3GAL6;CHST5;B4GALT4
mRNA Cis Splicing, Via Spliceosome (GO:0045292)	4/17	0.032162	0.965698	3.87788657904383	13.3281745165122	NCBP2;DDX23;WBP4;DCPS
Mesenchyme Development (GO:0060485)	4/17	0.032162	0.965698	3.87788657904383	13.3281745165122	BMP4;PKD2;BMP7;MEOX1
Negative Regulation Of Vascular Associated Smooth Muscle Cell Proliferation (GO:1904706)	4/17	0.032162	0.965698	3.87788657904383	13.3281745165122	BMP4;PTEN;PPARG;PRKG1
Triglyceride Biosynthetic Process (GO:0019432)	4/17	0.032162	0.965698	3.87788657904383	13.3281745165122	GPAM;PNPLA3;GPAT3;PCK1
Aspartate Aminotransferase Levels In Excessive Alcohol Consumption	4/17	0.032162	0.592446	3.87788657904383	13.3281745165122	MAGI1;PNPLA3;CTNNA2;ITGA9
Percent Mammographic Density	4/17	0.032162	0.592446	3.87788657904383	13.3281745165122	LINC01376;PPARG;PRKG1;ZNF365
Chronic Obstructive Pulmonary Disease Or High Blood Pressure (Pleiotropy)	4/17	0.032162	0.592446	3.87788657904383	13.3281745165122	CFDP1;SLC35F3;HDAC7;GTF2I
Attention Deficit Hyperactivity Disorder And Conduct Disorder	4/17	0.032162	0.592446	3.87788657904383	13.3281745165122	KIRREL3;RBFOX1;MYRFL;PRANCR
Sphingomyelin (D32:2) Levels	4/17	0.032162	0.592446	3.87788657904383	13.3281745165122	SLC48A1;CACNB3;VDR;RAPGEF3
Vaginal Microbiome Relative Abundance (S Aerococcus Christensenii)	4/17	0.032162	0.592446	3.87788657904383	13.3281745165122	KIRREL3;TENM2;LINC01509;RARB
PMC5112273 F2	4/17	0.032162	0.772861	3.87788657904383	13.3281745165122	SYNGAP1;BDNF;PTEN;ELMO1
PMC5217378 F7	4/17	0.032162	0.772861	3.87788657904383	13.3281745165122	NOP56;TUBA1B;RAD23B;SND1
PMC5831574 F8	4/17	0.032162	0.772861	3.87788657904383	13.3281745165122	LRRC4;ELMO1;MAPK1;THBS2
FOXO-mediated Transcription Of Cell Cycle Genes R-HSA-9617828	4/17	0.032162	0.999865	3.87788657904383	13.3281745165122	PCBP4;FOXO3;KLF4;FOXO1
Formation Of Senescence-Associated Heterochromatin Foci (SAHF) R-HSA-2559584	4/17	0.032162	0.999865	3.87788657904383	13.3281745165122	HIRA;HMGA1;TP53;ASF1A
PMC2496917-1471-2164-9-348.nxml--BT-474 Breast Cancer Cell Line RPS6KB1-suppressed RPS6KB1	4/17	0.032162	0.999995	3.87788657904383	13.3281745165122	COL5A1;SOX15;ST3GAL6;VTCN1
Hexose transport	7/42	0.0322683	0.999939	2.52278308321965	8.66240172014333	RANBP2;NUP188;NUP62;NUP54;RAE1;HK1;NUP37
B3GNT1	7/42	0.0322683	0.954599	2.52278308321965	8.66240172014333	RNF167;CNNM1;FKRP;MAN1A2;TMEM39A;HAPLN3;ADCY6
Transport Of Mature mRNA Derived From An Intronless Transcript R-HSA-159231	7/42	0.0322683	0.999865	2.52278308321965	8.66240172014333	RANBP2;NUP188;FIP1L1;NCBP2;NUP62;NUP54;NUP37
PMC9528698-NIHMS1835045-supplement-Supp Table 45 5.xlsx-TTN control-Gene TTN	7/42	0.0322683	0.999995	2.52278308321965	8.66240172014333	DOCK5;RPS6KA2;PDE3A;ELMO1;MAN1A1;A2M;PTPRG
MPP6	3/10	0.0323268	0.954599	5.39941690962099	18.5300401112345	MPP2;DMD;LIN7C
HNRNPK	3/10	0.0323268	0.954599	5.39941690962099	18.5300401112345	SNX9;SNX33;FNBP1L
MARK2	3/10	0.0323268	0.954599	5.39941690962099	18.5300401112345	NUAK2;CAV3;TMCC2
UGCG	3/10	0.0323268	0.954599	5.39941690962099	18.5300401112345	PTGIR;MRAP2;TMEM231
Dystrophin-sarcoglycan-syntrophin complex, skeletal muscle (mouse)	3/10	0.0323268	0.395381	5.39941690962099	18.5300401112345	SGCD;DMD;SGCG
T Cell Chemotaxis (GO:0010818)	3/10	0.0323268	0.965698	5.39941690962099	18.5300401112345	SLC12A2;CCR2;CXCL16
Phosphate Ion Transmembrane Transport (GO:0035435)	3/10	0.0323268	0.965698	5.39941690962099	18.5300401112345	SLC25A3;SLC37A1;SLC25A11
Sarcoplasmic Reticulum Calcium Ion Transport (GO:0070296)	3/10	0.0323268	0.965698	5.39941690962099	18.5300401112345	RYR1;RYR3;TRDN
Steroid Hormone Mediated Signaling Pathway (GO:0043401)	3/10	0.0323268	0.965698	5.39941690962099	18.5300401112345	BMP4;MAPK1;BMP7
Protein-Arginine N-methyltransferase Activity (GO:0016274)	3/10	0.0323268	0.982896	5.39941690962099	18.5300401112345	PRMT6;PRMT1;PRMT3
Response To Treatment In Irritable Bowel Syndrome (Pain Frequency)	3/10	0.0323268	0.592446	5.39941690962099	18.5300401112345	NELL1;CHRNA7;LINC02006
Cerebellum Cortex Volume	3/10	0.0323268	0.592446	5.39941690962099	18.5300401112345	WWC1;VSIG10L2;LINC01501
Celiac Disease Or Rheumatoid Arthritis	3/10	0.0323268	0.592446	5.39941690962099	18.5300401112345	ELMO1;UBASH3A;YDJC
Response To Cytidine Analogues (Gemcitabine)	3/10	0.0323268	0.592446	5.39941690962099	18.5300401112345	ANGPT2;DOCK1;MCPH1
F-cake/biscuits Liking (Derived Food-Liking Factor)	3/10	0.0323268	0.592446	5.39941690962099	18.5300401112345	LINC01414;RARB;CCDC171
Oxaloacetic Acid	3/10	0.0323268	0.917094	5.39941690962099	18.5300401112345	IL4I1;GOT1;PCK1
PMC1698511 F3	3/10	0.0323268	0.772861	5.39941690962099	18.5300401112345	IRF3;TRAF6;TIRAP
PMC2674015 F2a	3/10	0.0323268	0.772861	5.39941690962099	18.5300401112345	IRF3;TRAF6;TIRAP
PMC7600388 F1	3/10	0.0323268	0.772861	5.39941690962099	18.5300401112345	ANGPTL8;PNPLA3;LDLR
PMC2733081 F4	3/10	0.0323268	0.772861	5.39941690962099	18.5300401112345	ELK4;PTPRR;MAPK1
PMC7796397 F2	3/10	0.0323268	0.772861	5.39941690962099	18.5300401112345	RANBP2;NUP62;RAE1
PMC7248557 F1	3/10	0.0323268	0.772861	5.39941690962099	18.5300401112345	IRF3;TRAF6;TIRAP
PMC6889380 F2	3/10	0.0323268	0.772861	5.39941690962099	18.5300401112345	ABCB6;CPOX;ABCG2
PMC3216306 F1	3/10	0.0323268	0.772861	5.39941690962099	18.5300401112345	IRF3;TRAF6;TIRAP
PMC8056044 F6	3/10	0.0323268	0.772861	5.39941690962099	18.5300401112345	PRKCSH;BDNF;PFN1
PMC3653888 F3	3/10	0.0323268	0.772861	5.39941690962099	18.5300401112345	RXRB;VDR;PPARG
PMC3815777 F2	3/10	0.0323268	0.772861	5.39941690962099	18.5300401112345	IRF3;TRAF6;TIRAP
PMC3834158 F3	3/10	0.0323268	0.772861	5.39941690962099	18.5300401112345	SCARB1;LDLR;ABCG1
PMC4393718 F2	3/10	0.0323268	0.772861	5.39941690962099	18.5300401112345	RRAS;ILK;FYN
PMC4404318 F1	3/10	0.0323268	0.772861	5.39941690962099	18.5300401112345	IRF3;TRAF6;TIRAP
PMC4826512 F4	3/10	0.0323268	0.772861	5.39941690962099	18.5300401112345	SDC2;FYN;RND1
PMC4997072 F2	3/10	0.0323268	0.772861	5.39941690962099	18.5300401112345	IRF3;TRAF6;TIRAP
PMC5006394 F2	3/10	0.0323268	0.772861	5.39941690962099	18.5300401112345	PTEN;FOXO3;FOXO1
PMC5070717 F1	3/10	0.0323268	0.772861	5.39941690962099	18.5300401112345	IRF3;TRAF6;TIRAP
PMC5105987 F11	3/10	0.0323268	0.772861	5.39941690962099	18.5300401112345	WWOX;RXRA;GNPTAB
PMC5178148 F2	3/10	0.0323268	0.772861	5.39941690962099	18.5300401112345	PTEN;FOXO3;FOXO1
PMC5316362 F2	3/10	0.0323268	0.772861	5.39941690962099	18.5300401112345	HOXA10;DAXX;TP53
PMC5480880 F6	3/10	0.0323268	0.772861	5.39941690962099	18.5300401112345	CAST;EPHA7;PTEN
PMC5524794 F1	3/10	0.0323268	0.772861	5.39941690962099	18.5300401112345	ABCB6;CPOX;ABCG2
PMC5649420 F2	3/10	0.0323268	0.772861	5.39941690962099	18.5300401112345	TRAF6;PTEN;FYN
PMC5666340 F4	3/10	0.0323268	0.772861	5.39941690962099	18.5300401112345	IRF3;TRAF6;TIRAP
PMC5677537 F1	3/10	0.0323268	0.772861	5.39941690962099	18.5300401112345	IRF3;TRAF6;TIRAP
PMC6753331 F1	3/10	0.0323268	0.772861	5.39941690962099	18.5300401112345	APAF1;IRF3;TRAF6
PMC6820234 F1	3/10	0.0323268	0.772861	5.39941690962099	18.5300401112345	ABCB6;CPOX;ABCG2
PMC6843432 F4	3/10	0.0323268	0.772861	5.39941690962099	18.5300401112345	BMP4;TRAF6;ALPL
PMC8782566-Table 1.xlsx-DDR hubgenes-Unnamed 1 DDR1	3/10	0.0323268	0.999995	5.39941690962099	18.5300401112345	MUCL1;MUC13;TFF1
PMC5189935-pmed.1002201.s013.xlsx-HR HER2- Amplification-1Q21 2 ERBB2	3/10	0.0323268	0.999995	5.39941690962099	18.5300401112345	BCL9;ACP6;GJA8
Vitamin D Metabolism WP1531	3/10	0.0323268	0.995023	5.39941690962099	18.5300401112345	RXRB;RXRA;VDR
Liver X Receptor Pathway WP2874	3/10	0.0323268	0.995023	5.39941690962099	18.5300401112345	ABCG5;RXRA;CYP7A1
TCA Cycle In Senescence WP5050	3/10	0.0323268	0.995023	5.39941690962099	18.5300401112345	PDHA1;GOT1;TP53
Carbohydrate Biosynthetic Process (GO:0016051)	5/25	0.0331655	0.965698	3.15173705722071	10.7355915977152	FUT9;B3GALT4;ST3GAL6;ST6GALNAC5;MPDU1
Positive Regulation Of Interleukin-2 Production (GO:0032743)	5/25	0.0331655	0.965698	3.15173705722071	10.7355915977152	CD80;TRAF6;PRKD2;CCR2;RUNX1
Juvenile Idiopathic Arthritis (Oligoarticular Or Rheumatoid Factor-Negative Polyarticular)	5/25	0.0331655	0.599974	3.15173705722071	10.7355915977152	TIMMDC1;ANKRD55;PRR5L;UBE2L3;RUNX1
Fresh Fruit Consumption	5/25	0.0331655	0.599974	3.15173705722071	10.7355915977152	DGKG;CAST;ZFHX3;SND1;FARS2
PMC5587804 F4	5/25	0.0331655	0.772861	3.15173705722071	10.7355915977152	BMP4;PTEN;CHD5;BMP7;TP53
PMC6901278 F3	5/25	0.0331655	0.772861	3.15173705722071	10.7355915977152	SEMA3A;WNT7B;PTEN;SLIT3;NPAS3
PMC10363146-41598 2023 38681 MOESM1 ESM.pdf-419-STK3 STK3	5/25	0.0331655	0.999995	3.15173705722071	10.7355915977152	NAF1;SYNJ2;THBS1;LYVE1;RESF1
PMC3470785-NIHMS377161-supplement-12.pdf-178-PTK2 PTK2	5/25	0.0331655	0.999995	3.15173705722071	10.7355915977152	PSMB6;HINT1;ATXN10;TAPBP;SNRPB
Regulation Of PTEN Gene Transcription R-HSA-8943724	9/61	0.0336554	0.999865	2.18415037831021	7.40772391874253	PHC1;RING1;GDNF;PTEN;MAPK1;PPARG;CHD3;TP53;HDAC7
NEK4	78/862	0.0336706	0.99952	1.26541035769146	4.29117135606593	ARF3;BCAR3;OGFR;DGKG;DOCK5;ANKRD33B;PPP1R11;PRAG1;SLC44A2;PHF1;PLEK;BUB1B;ILK;ECE1;ARHGAP35;DOCK10;TUBA1B;GOLGA4;PPIP5K1;SH3PXD2A;PTTG1;SBF2;SLC12A8;TGM3;PRKG1;MAP4K1;DAXX;RING1;SHROOM3;CYBA;SENP3;TIRAP;ELF1;ILF3;CDC42EP4;MAP1A;KCNQ3;TERF2IP;TP53;PELI2;PRR5L;PPM1K;RASAL3;FOXO1;PLD2;EFNB2;NUAK2;RRAS;PAK6;LRRC8A;TP53BP1;ECT2;AP1M2;MPP2;GABBR1;OSBPL6;DTNA;XRCC4;VDR;EYA3;MYBPH;RASSF8;PARVB;FHDC1;APTX…
CDC42BPB human kinase ARCHS4 coexpression	31/299	0.0339841	0.999996	1.46466609394084	4.95329847027444	ARF3;SCARB2;MTCH1;CHPF;ITGB5;PRKCSH;WIZ;ECE1;SNX33;CHD3;ARHGAP35;STRN4;DNAJB2;SH3PXD2A;ABL1;PIEZO1;KIF1C;SH3BP4;SLC39A7;SPTAN1;SH3GLB2;PLEKHG5;MINK1;ACTN4;SCAF1;RAD23B;SENP3;NCOR2;CLIP2;PRR12;DOCK1
Fragile X Syndrome WP4549	15/122	0.0345519	0.995023	1.77108572747202	5.96022227404231	EIF4A1;ABCD3;DUSP3;BDNF;PTEN;AP2A1;GRIP2;DNM2;SYNGAP1;CLTCL1;AKT1S1;AP2S1;MAPK1;FYN;HCN1
Regulation Of Double-Strand Break Repair Via Homologous Recombination (GO:0010569)	10/71	0.0345763	0.965698	2.06918189661934	6.96194213576113	MAD2L2;PARPBP;HELQ;MRGBP;TERF2IP;RPA2;TP53BP1;SENP3;ZNF365;WRAP53
PMC3708595-NIHMS474972-supplement-1.pdf-9-PIK3CA PIK3CA	10/71	0.0345763	0.999995	2.06918189661934	6.96194213576113	RIPPLY2;RABGAP1;PTEN;RIMBP2;PRKD2;PKD2;RYR3;PRKG1;PTPRG;RUNX1
PMC7368985-12885 2020 7100 MOESM7 ESM.xlsx-ER HER2--Unnamed 6 ERBB2	11/81	0.0348407	0.999995	1.98384795778777	6.6597138708738	DOCK5;C1QTNF2;ZFHX3;SYNGAP1;DRAM1;SCFD2;PIEZO1;HSD17B8;ST6GALNAC5;PTPRG;FARS2
PMC7031046 F6	8/52	0.0352545	0.772861	2.29388768228359	7.67342808518017	FLG;KMT2D;ZFHX3;RPL22;PTEN;PIM1;TP53;ARHGAP35
Metabolism Of Non-Coding RNA R-HSA-194441	8/52	0.0352545	0.999865	2.29388768228359	7.67342808518017	RANBP2;NUP188;NCBP2;NUP62;NUP54;SNUPN;SNRPB;NUP37
ATM knockdown 18 GDS1852	31/300	0.0353309	0.999646	1.45914132065646	4.87790449249147	CUTA;PHF1;PRR3;KEAP1;MRPL17;RXRB;NHLH2;SNX4;CYB5R4;PSMD7;FXR2;MRPL40;MAN1A2;ZNF207;ABL1;SLIT2;MPDU1;ABCF1;SPAG7;SDF2L1;PDHA1;NCBP2;TAF10;RPA1;RC3H2;GTF2H5;DNM2;VAPB;TPP1;RGL2;NSMAF
PMC9528698-NIHMS1835045-supplement-Supp Table 12 10.xlsx-TTN control-Gene TTN	25/232	0.0357608	0.999995	1.5280113166253	5.08965611177224	DOCK5;ANKRD33B;PRAG1;ECE1;PPM1K;FOXO3;PKD2;BICD1;PDZD2;RASSF4;CALD1;RPS6KA2;FYN;PPFIA4;CARMIL1;EPHA7;OSBPL6;HEG1;ARRDC3;TBC1D9;DLG1;NOVA1;ZNF516;ATP13A3;RNF141
CRYL1	6/34	0.035847	0.954599	2.70216184633363	8.99413413138185	CEP164;EIF2AK4;PKD2;MYO9A;PLD2;WRAP53
PMC4979518 F6a	6/34	0.035847	0.772861	2.70216184633363	8.99413413138185	RXRA;PRMT1;AKT1S1;MAPK1;PCK1;ENO3
PMC6044387 F5	6/34	0.035847	0.772861	2.70216184633363	8.99413413138185	SET;PTEN;MAPK1;MDM4;FOXO3;TP53
Nuclear Import Of Rev Protein R-HSA-180746	6/34	0.035847	0.999865	2.70216184633363	8.99413413138185	RANBP2;NUP188;NUP62;NUP54;RAN;NUP37
Hepatocyte Growth Factor Receptor Signaling WP313	6/34	0.035847	0.995023	2.70216184633363	8.99413413138185	MAP4K1;HGF;ITGA1;PTEN;MAPK1;DOCK1
UV Response Dn	17/144	0.0360937	0.902342	1.69161547114303	5.61893405616296	ABCC1;BDNF;SDC2;SCHIP1;MAGI2;PTEN;MRPS31;SYNJ2;KALRN;F3;RUNX1;DLG1;RXRA;PPARG;FYN;LDLR;CDON
Positive Regulation Of Biomineral Tissue Development (GO:0070169)	7/43	0.0361818	0.965698	2.45257313930574	8.14057601387346	RXRB;BMP4;NELL1;PKDCC;RXRA;BMPR1B;BMP7
Regulation Of Cell-Cell Adhesion (GO:0022407)	7/43	0.0361818	0.965698	2.45257313930574	8.14057601387346	MAGI1;PTPRR;EPHA7;FUT9;MINK1;WNT1;PTPRG
Regulation Of Primary Metabolic Process (GO:0080090)	7/43	0.0361818	0.965698	2.45257313930574	8.14057601387346	C1QTNF2;PSAPL1;ANGPTL8;PPARG;ADIPOR1;LDLR;CNDP1
Transport Of Mature mRNAs Derived From Intronless Transcripts R-HSA-159234	7/43	0.0361818	0.999865	2.45257313930574	8.14057601387346	RANBP2;NUP188;FIP1L1;NCBP2;NUP62;NUP54;NUP37
PMC9528698-NIHMS1835045-supplement-Supp Table 20 5.xlsx-TTN control-Gene TTN	21/188	0.0368228	0.999995	1.59004305438709	5.24974763826704	CARMIL1;DOCK5;PLEKHH2;HEG1;SHROOM3;FOXO3;PCSK6;PLXDC2;KALRN;MEOX1;FOXO1;NPAS3;DYNC2LI1;MYO1D;PDZD2;SLC22A15;NDUFAF6;PI16;TBC1D17;ARGLU1;SPTAN1
PMC9528698-NIHMS1835045-supplement-Supp Table 44 10.Xlsx-Control TTN-Gene TTN	11/82	0.0376679	0.999995	1.95580046627233	6.41296651010485	SH3RF3;SPP1;PPARG;TOX;MCTP2;FGF13;FSIP1;THBS1;LYVE1;EIF4G3;HS3ST2
PMC9528698-NIHMS1835045-supplement-Supp Table 12 13.Xlsx-Control TTN-Gene TTN	14/113	0.0380247	0.999995	1.78614105413283	5.83982192348209	STEAP1B;SEMA3A;PLA2G2A;CCDC179;GP1BA;IQGAP2;BMP7;LRRTM4;AGBL3;FAM43A;SLIT3;GALNTL6;A2M;DISC1
WNT7A	5/26	0.0386535	0.954599	3.00149214999351	9.76421051035475	SDF2L1;WNT7B;FBLN1;LDLR;TUBA4A
CORO1A	5/26	0.0386535	0.954599	3.00149214999351	9.76421051035475	RABGAP1;TMEM205;POC1A;RASSF8;TMCC2
GUCY2C Signaling in Colorectal Cancer	5/26	0.0386535	0.984226	3.00149214999351	9.76421051035475	HGF;PTEN;MAPK1;TP53;PRKG1
Regulation Of Potassium Ion Transmembrane Transporter Activity (GO:1901016)	5/26	0.0386535	0.965698	3.00149214999351	9.76421051035475	DLG1;CAV3;CASQ2;ANK2;ATP1B2
Smoking Initiation	105/1205	0.0389218	0.614009	1.21599880382775	3.94737674507764	NALCN-AS1;THSD7B;TRAF3IP2;LINC01470;TMEM200C;ZBTB20;DISC1FP1;NDST4;LINC02714;DUXB;SBF2;LINC00378;ANKS1B;EPHA5;MAGI1;RBFOX1;EPHA7;LINC02790;MAGI2;SND1;KCNQ3;ELMO1;PRKD2;TOX;NSMAF;LINC02462;NECAB1;PSMD11;NTM;FOXO3;KALRN;NPAS3;TMTC4;SDCBP;ASIC4;LINC02619;LINC00678;TRPM3;ZFHX3;SLC10A7;OSBPL6;PTPRN2;BDNF;IQSEC1;LRRN2;INCA1;RASSF8;DCDC1;LRFN2;NCEH1;SSPN;GALNTL6;EIF4G3;PCSK1;TENM2;C17ORF75;CHD3;SIPA1L2;…
Glycoprotein Metabolic Process (GO:0009100)	8/53	0.0389453	0.965698	2.2427910504361	7.27919851016036	GOLPH3;PRKCSH;MAN1A2;FBXO2;FBXO6;MAN1A1;PCSK6;FBXO44
BL7009 (ZNF768)	8/53	0.0389453	0.999929	2.2427910504361	7.27919851016036	RPS4X;C17ORF75;IPO8;SET;RPS18;PNKP;SHROOM3;TMPO
DDX51	4/18	0.0390085	0.954599	3.60070018477098	11.6805809070857	CASQ2;RBM34;RRP8;NEUROG3
PRKAR1B	4/18	0.0390085	0.954599	3.60070018477098	11.6805809070857	VAPB;NOX5;ETFB;RAPGEF5
ZKSCAN1	4/18	0.0390085	0.954599	3.60070018477098	11.6805809070857	ZNF232;STX12;ZNF483;PRKG1
Branching Involved In Ureteric Bud Morphogenesis (GO:0001658)	4/18	0.0390085	0.965698	3.60070018477098	11.6805809070857	BMP4;CITED1;GDNF;PKD2
Regulation Of Adaptive Immune Response (GO:0002819)	4/18	0.0390085	0.965698	3.60070018477098	11.6805809070857	IL4I1;AHR;EIF2AK4;IL6ST
Ureteric Bud Development (GO:0001657)	4/18	0.0390085	0.965698	3.60070018477098	11.6805809070857	BMP4;SLIT2;PKD2;BMP7
Ureteric Bud Morphogenesis (GO:0060675)	4/18	0.0390085	0.965698	3.60070018477098	11.6805809070857	BMP4;CITED1;GDNF;PKD2
Familial Lung Adenocarcinoma	4/18	0.0390085	0.614009	3.60070018477098	11.6805809070857	RNLS;NTM;C1D;MALRD1
B-cell Malignancies (Chronic Lymphocytic Leukemia, Hodgkin Lymphoma Or Multiple Myeloma) (Pleiotropy)	4/18	0.0390085	0.614009	3.60070018477098	11.6805809070857	LINC02882;BMF;ELL2;LINC00378
Axon guidance mediated by Slit/Robo Homo sapiens P00008	4/18	0.0390085	0.995506	3.60070018477098	11.6805809070857	NTNG1;ABL1;SLIT3;SLIT2
PMC7880612 F1	4/18	0.0390085	0.772861	3.60070018477098	11.6805809070857	PTEN;PTOV1;SPP1;TFF1
PMC6885362 F3	4/18	0.0390085	0.772861	3.60070018477098	11.6805809070857	IRF3;CD80;TRAF6;TIRAP
LDL Clearance R-HSA-8964038	4/18	0.0390085	0.999865	3.60070018477098	11.6805809070857	NCEH1;AP2S1;AP2A1;LDLR
Focal adhesion	22/201	0.0403081	0.999995	1.55414297209784	4.99066862997403	CAV3;ITGB5;LAMC3;HGF;ITGA1;PTEN;ILK;ACTN4;PARVB;THBS2;THBS1;ARHGAP35;COL2A1;SPP1;MYL10;PAK6;MAPK1;COL9A3;FYN;PAK3;DOCK1;ITGA9
Neuron Projection Morphogenesis (GO:0048812)	17/146	0.0403859	0.965698	1.66520785416134	5.3441073487555	NTNG1;BDNF;SDC2;MINK1;PTEN;EIF2AK4;BMP7;ARHGAP35;DNM2;DOCK10;MAP1A;EPB41L3;CTNNA2;PAK3;NBL1;DSCAML1;ZNF365
Cellular Response To Ketone (GO:1901655)	7/44	0.0403959	0.965698	2.3861583274953	7.65724862871942	MAP4K1;SCNN1G;GOLPH3;SPP1;AHR;PCK1;ADCY6
Nucleobase-Containing Compound Catabolic Process (GO:0034655)	7/44	0.0403959	0.965698	2.3861583274953	7.65724862871942	ISG20;SUPV3L1;RNASET2;PPP1R8;RNASE6;RNASE2;EXOSC2
Regulation Of Transport (GO:0051049)	7/44	0.0403959	0.965698	2.3861583274953	7.65724862871942	DNAJA1;DISP3;NELL1;PTPRN2;PTPRN;WWC1;PLD2
S-7-hydroxywarfarin Levels	7/44	0.0403959	0.614009	2.3861583274953	7.65724862871942	ZER1;SEMA3A;LINC01828;SHROOM3;LINC01036;SBF2;LINC02422
Total Phospholipid Levels In Lipoprotein Particles	7/44	0.0403959	0.614009	2.3861583274953	7.65724862871942	DOCK6;SCARB1;GPAM;TMPRSS11E;TRIM31;CD300LG;UBE2L3
LGALS3	11/83	0.0406514	0.954599	1.92853207174343	6.17655368384282	SLC12A2;RNF167;HEG1;ATG9A;ITGA1;ECE1;CSPG4;EMB;ATP13A3;ADCY6;SDK2
Pork Consumption	6/35	0.0406657	0.614009	2.60884281785488	8.35447818960715	KIRREL3;CARMIL1;LRRTM4;LRRN2;LINC01414;TOX
Cognitive Function (Generalized Correlation Coefficient)	6/35	0.0406657	0.614009	2.60884281785488	8.35447818960715	MAGI1;MARCHF1;CFDP1;THSD7B;PRMT3;RIMBP2
Alanine Aminotransferase (ALT) Levels After Remission Induction Therapy In Actute Lymphoblastic Leukemia (ALL)	6/35	0.0406657	0.614009	2.60884281785488	8.35447818960715	CAST;TMEM132D;PLEKHG1;PNPLA3;AHR;LINC01411
PMC2683871 F6	6/35	0.0406657	0.772861	2.60884281785488	8.35447818960715	KLF6;CCNE2;PERP;TP53INP1;ZNF148;TP53
NEP/NS2 Interacts With Cellular Export Machinery R-HSA-168333	6/35	0.0406657	0.999865	2.60884281785488	8.35447818960715	RANBP2;NUP188;NUP62;NUP54;RAN;NUP37
Rev-mediated Nuclear Export Of HIV RNA R-HSA-165054	6/35	0.0406657	0.999865	2.60884281785488	8.35447818960715	RANBP2;NUP188;NUP62;NUP54;RAN;NUP37
Transport Of SLBP Independent Mature mRNA R-HSA-159227	6/35	0.0406657	0.999865	2.60884281785488	8.35447818960715	RANBP2;NUP188;NCBP2;NUP62;NUP54;NUP37
Vpr-mediated Nuclear Import Of PICs R-HSA-180910	6/35	0.0406657	0.999865	2.60884281785488	8.35447818960715	RANBP2;NUP188;NUP62;HMGA1;NUP54;NUP37
IgG Glycosylation	23/213	0.0417929	0.614009	1.53085662431942	4.86051515599644	MAGI1;TMEM132D;LINGO2;CDK18;PTPRR;MON2;LINC00331;ZNF804B;CADPS;ARHGAP29;PARVB;ELL2;SGCZ;GLI3;ARHGAP29-AS1;LRRTM4;ELMO1;RARB;PLCH1;PRKG1;LINC02006;NSMAF;UMODL1
PMC5189935-pmed.1002201.s013.xlsx-HR HER2- Deletion-1P36 12 ERBB2	26/247	0.0418528	0.999995	1.48835318508882	4.72343382728137	STX12;IFI6;ECE1;MICOS10;HTR6;PPP1R8;TAS1R2;NBPF3;EYA3;PLA2G2A;IFFO2;RPA2;TMCO4;XKR8;ALDH4A1;FGR;THEMIS2;PAX7;ALPL;FAM76A;RNF186;SMPDL3B;NBL1;EIF4G3;AHDC1;OTUD3
Mechanism of protein import into the nucleus	3/11	0.0420673	0.999939	4.72423469387755	14.968663474914	RANBP2;NUP62;RAN
C4BPB	3/11	0.0420673	0.954599	4.72423469387755	14.968663474914	DCTN6;SLC25A15;VPS52
CUTA	3/11	0.0420673	0.954599	4.72423469387755	14.968663474914	ZER1;CLTCL1;PRKAG1
SLC10A7	3/11	0.0420673	0.954599	4.72423469387755	14.968663474914	MME;DPY19L4;IQCF1
SNRPD1	3/11	0.0420673	0.954599	4.72423469387755	14.968663474914	LSM6;DDX23;SNRPA1
WDR44	3/11	0.0420673	0.954599	4.72423469387755	14.968663474914	PDP1;VAPB;KBTBD7
CIRH1A	3/11	0.0420673	0.954599	4.72423469387755	14.968663474914	NECAB1;GOLGA4;CNRIP1
RAB3GAP1	3/11	0.0420673	0.954599	4.72423469387755	14.968663474914	DOCK5;VAPB;SIRT2
CDK16	3/11	0.0420673	0.954599	4.72423469387755	14.968663474914	CDK17;CDK18;NUP54
Ganglion Development (GO:0061548)	3/11	0.0420673	0.965698	4.72423469387755	14.968663474914	NELL1;SEMA3A;UNC5C
Negative Regulation Of Amyloid Fibril Formation (GO:1905907)	3/11	0.0420673	0.965698	4.72423469387755	14.968663474914	IAPP;LDLR;PFDN6
Negative Regulation Of Release Of Sequestered Calcium Ion Into Cytosol (GO:0051280)	3/11	0.0420673	0.965698	4.72423469387755	14.968663474914	CASQ2;PKD2;TRDN
Negative Regulation Of Ryanodine-Sensitive Calcium-Release Channel Activity (GO:0060315)	3/11	0.0420673	0.965698	4.72423469387755	14.968663474914	CASQ2;PKD2;TRDN
pre-mRNA Cleavage Required For Polyadenylation (GO:0098789)	3/11	0.0420673	0.965698	4.72423469387755	14.968663474914	NCBP2;CSTF2T;CPSF4L
Regulation Of Cell Cycle Checkpoint (GO:1901976)	3/11	0.0420673	0.965698	4.72423469387755	14.968663474914	ETAA1;RPA2;WDR76
Regulation Of Cilium Movement (GO:0003352)	3/11	0.0420673	0.965698	4.72423469387755	14.968663474914	CRNN;CCDC65;CYB5D1
Single-Stranded Telomeric DNA Binding (GO:0043047)	3/11	0.0420673	0.982896	4.72423469387755	14.968663474914	RPA1;RPA2;TERF2IP
Oral Cavity And Pharyngeal Cancer	3/11	0.0420673	0.614009	4.72423469387755	14.968663474914	HELQ;LAMC3;CCDC192
Dental Caries (Decayed, Missing And Filled Teeth)	3/11	0.0420673	0.614009	4.72423469387755	14.968663474914	C3ORF20;CCDC150;THSD4
Lipoprotein Phospholipase A2 Activity In Cardiovascular Disease	3/11	0.0420673	0.614009	4.72423469387755	14.968663474914	SCARB1;TP53BP1;LDLR
Amyotrophic Lateral Sclerosis (Age Of Onset)	3/11	0.0420673	0.614009	4.72423469387755	14.968663474914	CNOT2;CCDC192;ANKS1B
Hearing Function	3/11	0.0420673	0.614009	4.72423469387755	14.968663474914	RBFOX1;SV2C;LRRN2
Response To Cytadine Analogues (Cytosine Arabinoside)	3/11	0.0420673	0.614009	4.72423469387755	14.968663474914	EPHA7;ZNF215;CTCFL
Vaginal Microbiome MetaCyc Pathway (PWY-7373|superpathway Of Demethylmenaquinol-6 Biosynthesis II)	3/11	0.0420673	0.614009	4.72423469387755	14.968663474914	BCAR3;C3ORF20;BMPR1B
Vaginal Microbiome MetaCyc Pathway (PWY-6749|CMP-legionaminate Biosynthesis I)	3/11	0.0420673	0.614009	4.72423469387755	14.968663474914	WWOX;SLCO1A2;PDE3A
Minimum Measurement Of Hepatic Fat	3/11	0.0420673	0.614009	4.72423469387755	14.968663474914	SAMM50;PNPLA3;PARVB
CDK9	3/11	0.0420673	0.684731	4.72423469387755	14.968663474914	POLR2A;PPARG;TP53
PMC1064894 F3	3/11	0.0420673	0.772861	4.72423469387755	14.968663474914	IRF3;TRAF6;TIRAP
PMC2674123 F10	3/11	0.0420673	0.772861	4.72423469387755	14.968663474914	CDC37;PTEN;ILK
PMC2679904 F1	3/11	0.0420673	0.772861	4.72423469387755	14.968663474914	IRF3;TRAF6;TIRAP
PMC2721684 F1	3/11	0.0420673	0.772861	4.72423469387755	14.968663474914	IRF3;TRAF6;TIRAP
PMC7905024 F1	3/11	0.0420673	0.772861	4.72423469387755	14.968663474914	IRF3;TRAF6;TIRAP
PMC2909662 F1	3/11	0.0420673	0.772861	4.72423469387755	14.968663474914	IRF3;TRAF6;TIRAP
PMC7830297 F1	3/11	0.0420673	0.772861	4.72423469387755	14.968663474914	IRF3;TRAF6;TIRAP
PMC3053440 F1	3/11	0.0420673	0.772861	4.72423469387755	14.968663474914	IRF3;TRAF6;TIRAP
PMC7904555 F1	3/11	0.0420673	0.772861	4.72423469387755	14.968663474914	IRF3;TRAF6;TIRAP
PMC7848207 F2	3/11	0.0420673	0.772861	4.72423469387755	14.968663474914	KEAP1;FOXO1;HIC1
PMC3570673 F6	3/11	0.0420673	0.772861	4.72423469387755	14.968663474914	NHLH2;BDNF;RARB
PMC7258707 F7	3/11	0.0420673	0.772861	4.72423469387755	14.968663474914	IRF3;TRAF6;TIRAP
PMC3726361 F4	3/11	0.0420673	0.772861	4.72423469387755	14.968663474914	PTEN;ILK;FYN
PMC3794382 F1	3/11	0.0420673	0.772861	4.72423469387755	14.968663474914	DAXX;SET;TRAF6
PMC3819657 F3	3/11	0.0420673	0.772861	4.72423469387755	14.968663474914	PIM1;ARRB2;RUNX1
PMC3932036 F5	3/11	0.0420673	0.772861	4.72423469387755	14.968663474914	CDC37;PTEN;ILK
PMC3944192 F1	3/11	0.0420673	0.772861	4.72423469387755	14.968663474914	BMP4;WNT7B;BMP7
PMC4325931 F6	3/11	0.0420673	0.772861	4.72423469387755	14.968663474914	APAF1;PERP;TP53
PMC4799985 F1	3/11	0.0420673	0.772861	4.72423469387755	14.968663474914	IRF3;TRAF6;TIRAP
PMC5664350 F3	3/11	0.0420673	0.772861	4.72423469387755	14.968663474914	IRF3;TRAF6;TIRAP
PMC5664350 F4	3/11	0.0420673	0.772861	4.72423469387755	14.968663474914	IRF3;TRAF6;TIRAP
PMC5748601 F1	3/11	0.0420673	0.772861	4.72423469387755	14.968663474914	IRF3;TRAF6;TIRAP
PMC5852877 F1	3/11	0.0420673	0.772861	4.72423469387755	14.968663474914	IRF3;TRAF6;TIRAP
PMC6013028 F2	3/11	0.0420673	0.772861	4.72423469387755	14.968663474914	ABCG5;LDLR;CYP7A1
PMC6126176 F6	3/11	0.0420673	0.772861	4.72423469387755	14.968663474914	APAF1;BDNF;MAGI2
PMC6714139 F2	3/11	0.0420673	0.772861	4.72423469387755	14.968663474914	IRF3;TRAF6;TIRAP
PMC5189935-pmed.1002201.s013.xlsx-HR HER2- Deletion-12P11 21 ERBB2	3/11	0.0420673	0.999995	4.72423469387755	14.968663474914	H3-5;BICD1;RESF1
PMC6352339-12858 2019 105 MOESM1 ESM.docx-0-TGFBR1 TGFBR1	3/11	0.0420673	0.999995	4.72423469387755	14.968663474914	TNFRSF25;THBS1;TP53
Human adenovirus D8 protease (gene: L3)	3/11	0.0420673	0.998493	4.72423469387755	14.968663474914	UBD;AP2A1;PCK1
NAD Metabolism Sirtuins And Aging WP3630	3/11	0.0420673	0.995023	4.72423469387755	14.968663474914	PPARG;FOXO3;FOXO1
PMC9528698-NIHMS1835045-supplement-Supp Table 21 4.xlsx-TTN control-Gene TTN	17/147	0.042665	0.999995	1.65230874894336	5.21200436922747	CARMIL1;DOCK5;PLEKHH2;TENM4;SHROOM3;IQGAP2;FOXO3;PCSK6;PLXDC2;KALRN;FOXO1;ELF1;PDZD2;RGCC;RPS6KA2;SHOC1;PI16
Waist Circumference	18/158	0.0428787	0.614009	1.62477172312224	5.11702540590785	DGKG;LINGO2;LINC01242;RBFOX1;KCNE4;SEMA3A;TBC1D9;ACTN4;FOXO3;TDRG1;RPS6KA2;LINC01822;LINC00678;PPARG;DMD;ATXN10;DISC1;ANKS1B
Negative Regulation Of Neuron Projection Development (GO:0010977)	8/54	0.0428854	0.965698	2.19391601127764	6.90913370328909	EFNB2;EFNB3;PRAG1;RTN4RL1;SEMA3A;PTEN;ADCY6;ZNF365
PMC6621974-Table 4.xlsx-Sheet1-Table S4 Genes Related To Lipid And Steroid Signaling Altered In MEC1 JVM2 Or ATR	8/54	0.0428854	0.999995	2.19391601127764	6.90913370328909	AGPAT5;ACOT7;ACP6;MVD;PRKD2;LTA4H;SYNJ2;HSD17B8
PMC5189935-pmed.1002201.s013.xlsx-HR-HER2- Deletion-15Q22 31 ERBB2	51/543	0.0436435	0.999995	1.31468474494872	4.11719900518072	GABRB3;BUB1B;PCSK6;SRP14;HAPLN3;FBXO22;NR2E3;RYR3;GPR176;PPIP5K1;UBE2Q2;PDIA3;IMP3;AEN;WDR76;SELENOS;NRG4;MAP1A;SNRPA1;MFGE8;MCTP2;CATSPER2;ANP32A;SPESP1;CHRNA7;SNX33;THBS1;THSD4;ACAN;SV2B;CHSY1;PAK6;BMF;TP53BP1;SERF2;CKMT1A;CIMAP1C;EIF2AK4;CORO2B;MYO9A;SNUPN;ELL3;HYPK;ISG20;MFAP1;STRC;NOX5;CSPG4;ANKRD63;FSIP1;SERINC4
Axon Guidance R-HSA-422475	49/519	0.0437824	0.999865	1.32200723165192	4.13593083213059	NRP2;RPL32;AP2A1;ARHGAP35;RND1;RPS4X;PSMD7;SYNGAP1;RPS6KA2;HOXA2;SPTAN1;EPHA5;EPHA7;NCBP2;RPL22;ITGA1;UNC5C;ANK2;RNASE1;DNM2;CACNB3;KCNQ3;DCX;RPL29;PFN1;DSCAML1;DOCK1;ITGA9;PSMD11;SEMA3A;SDC2;KALRN;PSMB6;EFNB2;SDCBP;EFNB3;RRAS;CLTCL1;AP2S1;ABL1;MAPK1;FYN;SLIT3;SLIT2;NFASC;DLG1;GDNF;COL9A3;CDK5R1
PMC4882864-40478 2016 323 MOESM17 ESM.xlsx-3 De-regulated Genes DM CpG-De-regulated Gene Expression Between Infratentorial Pilocytic Astrocytomas PA And Normal Brain Adult And Foetal Cerebellum DMPK	11/84	0.0437945	0.999995	1.90201075651669	5.94995794409456	SLC24A2;MBNL1;ELF1;ADORA1;LDLRAD3;ZNF469;HLA-A;IL6ST;THBS2;BMP7;RUNX1
PMC9528698-NIHMS1835045-supplement-Supp Table 21 7.Xlsx-Control TTN-Gene TTN	37/376	0.0439032	0.999995	1.38239620052424	4.32105002807487	KANK2;BCAR3;PKDCC;ANKRD33B;SLC44A2;KCNE4;PHF1;ZFAND2B;ADM;FBLN1;CHD3;HK1;PLAC9;DNPEP;AIFM2;FAM184A;PIM1;POC1A;SLIT3;DISC1;LDLR;TP53I11;TRPM3;CDON;MPDU1;CYB5A;PTGIR;ABCC1;CAMK1D;FBXO2;HGF;PLA2G2A;F3;HIC1;NOVA1;CDC42EP4;PPARG
Complement Factor H-related Protein 3 Levels	9/64	0.0440073	0.614009	2.06467958271237	6.44881754470911	EDAR;SH3RF3;MED11;ACAN;WWOX;FUT9;CCDC14;LUCAT1;KALRN
Activation Of NMDA Receptors And Postsynaptic Events R-HSA-442755	10/74	0.0442114	0.999865	1.97186859193438	6.14981019403074	MPP2;DLG1;RPS6KA2;PRKAG1;PRKAG2;NEFL;MAPK1;LIN7C;RNASE1;PPM1F
RHOG GTPase Cycle R-HSA-9013408	10/74	0.0442114	0.999865	1.97186859193438	6.14981019403074	VANGL1;DOCK5;PRKCSH;VAPB;STBD1;IQGAP2;DOCK1;KALRN;ARHGAP35;TMPO
Arrhythmogenic Right Ventricular Cardiomyopathy WP2118	10/74	0.0442114	0.995023	1.97186859193438	6.14981019403074	CACNB3;SGCD;DES;ITGB5;ITGA1;DMD;ACTN4;CTNNA2;SGCG;ITGA9
Smoking Status (Standard GWA)	5/27	0.0446626	0.614009	2.86490587069606	8.90590000011131	TENM2;ZFHX3;SYNGAP1;PTPRN2;NTM
Coronary Artery Calcified Atherosclerotic Plaque Score In Type 2 Diabetes	5/27	0.0446626	0.614009	2.86490587069606	8.90590000011131	MAGI1;FSTL5;LINC02619;ABL1;ELL2
Facial Wrinkles	5/27	0.0446626	0.614009	2.86490587069606	8.90590000011131	LINGO2;GPAM;MAGI2;CMBL;LINC02422
Nonsyndromic Orofacial Cleft X Sex Interaction	5/27	0.0446626	0.614009	2.86490587069606	8.90590000011131	CRAT37;ZFHX3;IGLON5;SSPN;KIF6
CREB1 Phosphorylation Thru NMDA Receptor-Mediated Activation Of RAS Signaling R-HSA-442742	5/27	0.0446626	0.999865	2.86490587069606	8.90590000011131	MPP2;DLG1;RPS6KA2;MAPK1;NEFL
Postmitotic Nuclear Pore Complex (NPC) Reformation R-HSA-9615933	5/27	0.0446626	0.999865	2.86490587069606	8.90590000011131	NUP188;NUP62;NUP54;RAN;NUP37
1Q21 1 Copy Number Variation Syndrome WP4905	5/27	0.0446626	0.995023	2.86490587069606	8.90590000011131	BCL9;ACP6;PRKAG1;PRKAG2;GJA8
ADAM33	6/36	0.0458745	0.954599	2.52174505794138	7.77162793915136	SDF2L1;ITGB5;TMEM67;FBXO2;HLA-A;DGCR2
Thiazide-induced Adverse Metabolic Effects In Hypertensive Patients	6/36	0.0458745	0.614009	2.52174505794138	7.77162793915136	NELL1;ZFHX3;VTA1;PIEZO2;ARHGAP29;THSD4
PMC6337789 F2	6/36	0.0458745	0.772861	2.52174505794138	7.77162793915136	POLR2A;RING1;CALD1;AKT1S1;ABL1;MAPK1
PMC6462501 F5	6/36	0.0458745	0.772861	2.52174505794138	7.77162793915136	GOLPH3;ABL1;RPA1;MAPK1;RPA2;TP53
Export Of Viral Ribonucleoproteins From Nucleus R-HSA-168274	6/36	0.0458745	0.999865	2.52174505794138	7.77162793915136	RANBP2;NUP188;NUP62;NUP54;RAN;NUP37
Transport Of SLBP Dependant Mature mRNA R-HSA-159230	6/36	0.0458745	0.999865	2.52174505794138	7.77162793915136	RANBP2;NUP188;NCBP2;NUP62;NUP54;NUP37
PMC10359957-jamanetwopen-e2324380-s001.pdf-25-PAK1 PAK1	6/36	0.0458745	0.999995	2.52174505794138	7.77162793915136	PDP1;PCSK1;PDHA1;PCCA;PAK3;PCK1
PMC3702285-cddis2013211x6.pdf-329-PRKACA PRKACA	6/36	0.0458745	0.999995	2.52174505794138	7.77162793915136	DOCK5;STK16;PPP1R8;IDH3B;F3;MFSD4B
Positive Regulation Of Epithelial Cell Migration (GO:0010634)	12/95	0.0460138	0.965698	1.82518987654932	5.61942170479549	BMP4;DOCK5;SCARB1;NELL1;RRAS;IQSEC1;ABL1;PRKD2;PFN1;DOCK1;THBS1;PPM1F
PMC9528698-NIHMS1835045-supplement-Supp Table 58 9.xlsx-TTN control-Gene TTN	12/95	0.0460138	0.999995	1.82518987654932	5.61942170479549	SH3RF3;PDZD2;PTPRN2;SPESP1;ITGA1;YPEL1;RARB;LRRC8A;FOXO3;HS3ST4;SLC12A8;PTPRG
PTEN-dependent cell cycle arrest and apoptosis	4/19	0.0466203	0.999939	3.36047197640118	10.302260487893	PTEN;ILK;MAPK1;FOXO3
SNW1	4/19	0.0466203	0.954599	3.36047197640118	10.302260487893	PPIL1;DHX8;ZC3H18;SNRPA1
PRKAB1	4/19	0.0466203	0.954599	3.36047197640118	10.302260487893	CUTA;PRKAG1;PRKAG2;TUBA4A
N-glycan Processing (GO:0006491)	4/19	0.0466203	0.965698	3.36047197640118	10.302260487893	GNPTAB;PRKCSH;MAN1A2;MAN1A1
Glycosphingolipid Biosynthetic Process (GO:0006688)	4/19	0.0466203	0.965698	3.36047197640118	10.302260487893	FUT9;B3GALT4;B4GALT4;ST6GALNAC5
Insulin Secretion (GO:0030073)	4/19	0.0466203	0.965698	3.36047197640118	10.302260487893	CYB5R4;PTPRN2;PTPRN;KLRG1
Regulation Of Cellular Response To Growth Factor Stimulus (GO:0090287)	4/19	0.0466203	0.965698	3.36047197640118	10.302260487893	FSTL5;NELL1;SLIT2;PCSK6
Superoxide Anion Generation (GO:0042554)	4/19	0.0466203	0.965698	3.36047197640118	10.302260487893	SH3PXD2A;NOX3;CYBA;NOX5
Response To Paliperidone In Schizophrenia (Multivariate)	4/19	0.0466203	0.614009	3.36047197640118	10.302260487893	CCDC122;COL26A1;SGCD;IQGAP2
PMC7899014 F10	4/19	0.0466203	0.772861	3.36047197640118	10.302260487893	IRF3;TRAF6;FYN;CCR2
PMC2739389 F2	4/19	0.0466203	0.772861	3.36047197640118	10.302260487893	HGF;PTEN;MAPK1;FOXO1
PMC7290051 F5	4/19	0.0466203	0.772861	3.36047197640118	10.302260487893	ABCC1;ABCB6;CPOX;ABCG2
PMC7999074 F2	4/19	0.0466203	0.772861	3.36047197640118	10.302260487893	GOT1;PSAT1;SLC1A5;HK1
PMC3852044 F3	4/19	0.0466203	0.772861	3.36047197640118	10.302260487893	DAXX;BDNF;TRAF6;RAN
PMC4469326 F2	4/19	0.0466203	0.772861	3.36047197640118	10.302260487893	IRF3;CD80;TRAF6;TIRAP
PMC4877005 F2	4/19	0.0466203	0.772861	3.36047197640118	10.302260487893	EPB41L3;ANK2;ACTN4;SPTAN1
PMC6349186 F5	4/19	0.0466203	0.772861	3.36047197640118	10.302260487893	BDNF;PTEN;ILK;FYN
PMC6388629 F6	4/19	0.0466203	0.772861	3.36047197640118	10.302260487893	DAXX;TNFSF12;GAS2;SPTAN1
PMC9537286-41598 2022 21159 MOESM2 ESM.docx-10-AURKA AURKA	4/19	0.0466203	0.999995	3.36047197640118	10.302260487893	HMGA1;RPA1;TP53;SNRPB
Basic mechanism of action of PPARa, PPARb(d) and PPARg and effects on gene expression Homo sapiens h pparPathway	2/5	0.046665	0.948896	8.39519601178337	25.7292747138916	RXRA;PPARG
Cycling of Ran in nucleocytoplasmic transport	2/5	0.046665	0.999939	8.39519601178337	25.7292747138916	RANBP2;RAN
Flap intermediate removal from the telomere lagging strand (C-strand)	2/5	0.046665	0.999939	8.39519601178337	25.7292747138916	RPA1;RPA2
N-glycan trimming and elongation in the cis-Golgi	2/5	0.046665	0.999939	8.39519601178337	25.7292747138916	MAN1A2;MAN1A1
Phenylalanine, tyrosine and tryptophan biosynthesis	2/5	0.046665	0.999939	8.39519601178337	25.7292747138916	IL4I1;GOT1
TNF-alpha/NF-kappa B signaling complex 9 (human)	2/5	0.046665	0.395381	8.39519601178337	25.7292747138916	CDC37;NFKBIB
CRM1-RAN-PHAX-CBC complex (cap binding complex) (human)	2/5	0.046665	0.395381	8.39519601178337	25.7292747138916	NCBP2;RAN
RPA-MSH4-BLM complex (mouse)	2/5	0.046665	0.395381	8.39519601178337	25.7292747138916	RPA1;RPA2
HGFR -> FOXO3A Signaling	2/5	0.046665	0.984226	8.39519601178337	25.7292747138916	HGF;FOXO3
TLR -> ARRB2/NF-kB Signaling	2/5	0.046665	0.984226	8.39519601178337	25.7292747138916	TRAF6;ARRB2
RNA Decapping (GO:0110154)	2/5	0.046665	0.965698	8.39519601178337	25.7292747138916	DCPS;NUDT3
acetyl-CoA Biosynthetic Process From Pyruvate (GO:0006086)	2/5	0.046665	0.965698	8.39519601178337	25.7292747138916	PDHA2;PDHA1
Bradykinin Catabolic Process (GO:0010815)	2/5	0.046665	0.965698	8.39519601178337	25.7292747138916	MME;ECE1
Cell-Cell Signaling Involved In Cardiac Conduction (GO:0086019)	2/5	0.046665	0.965698	8.39519601178337	25.7292747138916	RNF207;CASQ2
Cellular Response To Cold (GO:0070417)	2/5	0.046665	0.965698	8.39519601178337	25.7292747138916	EIF2AK4;FOXO1
Cerebral Cortex Cell Migration (GO:0021795)	2/5	0.046665	0.965698	8.39519601178337	25.7292747138916	HTR6;FGF13
Cholesterol Import (GO:0070508)	2/5	0.046665	0.965698	8.39519601178337	25.7292747138916	SCARB1;LDLR
Determination Of Liver Left/Right Asymmetry (GO:0071910)	2/5	0.046665	0.965698	8.39519601178337	25.7292747138916	ZIC3;PKD2
Heterocycle Catabolic Process (GO:0046700)	2/5	0.046665	0.965698	8.39519601178337	25.7292747138916	CYP2A6;PRODH
Induction Of Bacterial Agglutination (GO:0043152)	2/5	0.046665	0.965698	8.39519601178337	25.7292747138916	SFTPD;RNASE2
interleukin-17A-mediated Signaling Pathway (GO:0038173)	2/5	0.046665	0.965698	8.39519601178337	25.7292747138916	TRAF3IP2;TRAF6
Negative Regulation Of Cell Size (GO:0045792)	2/5	0.046665	0.965698	8.39519601178337	25.7292747138916	CAV3;PTEN
Negative Regulation Of Monocyte Chemotaxis (GO:0090027)	2/5	0.046665	0.965698	8.39519601178337	25.7292747138916	SLIT2;NBL1
Plasma Membrane Raft Assembly (GO:0044854)	2/5	0.046665	0.965698	8.39519601178337	25.7292747138916	CAV3;EMP2
Positive Regulation Of Extrinsic Apoptotic Signaling Pathway Via Death Domain Receptors (GO:1902043)	2/5	0.046665	0.965698	8.39519601178337	25.7292747138916	PTEN;THBS1
Positive Regulation Of Focal Adhesion Disassembly (GO:0120183)	2/5	0.046665	0.965698	8.39519601178337	25.7292747138916	DUSP3;IQSEC1
Positive Regulation Of Hemoglobin Biosynthetic Process (GO:0046985)	2/5	0.046665	0.965698	8.39519601178337	25.7292747138916	PRMT1;KLF4
Positive Regulation Of Receptor Binding (GO:1900122)	2/5	0.046665	0.965698	8.39519601178337	25.7292747138916	NELL1;BDNF
Postsynaptic Density Assembly (GO:0097107)	2/5	0.046665	0.965698	8.39519601178337	25.7292747138916	PTEN;ZDHHC12
Proline Metabolic Process (GO:0006560)	2/5	0.046665	0.965698	8.39519601178337	25.7292747138916	ALDH4A1;PRODH
Protein Localization To Site Of Double-Strand Break (GO:1990166)	2/5	0.046665	0.965698	8.39519601178337	25.7292747138916	PARP3;XRCC4
Pteridine-Containing Compound Metabolic Process (GO:0042558)	2/5	0.046665	0.965698	8.39519601178337	25.7292747138916	MTHFD1L;PRKG2
Regulation Of cGMP-mediated Signaling (GO:0010752)	2/5	0.046665	0.965698	8.39519601178337	25.7292747138916	PDE11A;THBS1
Regulation Of Focal Adhesion Disassembly (GO:0120182)	2/5	0.046665	0.965698	8.39519601178337	25.7292747138916	DUSP3;IQSEC1
Regulation Of Retinal Ganglion Cell Axon Guidance (GO:0090259)	2/5	0.046665	0.965698	8.39519601178337	25.7292747138916	NELL1;SLIT2
Regulation Of Thymocyte Apoptotic Process (GO:0070243)	2/5	0.046665	0.965698	8.39519601178337	25.7292747138916	BMP4;TP53
Renal System Process Involved In Regulation Of Blood Volume (GO:0001977)	2/5	0.046665	0.965698	8.39519601178337	25.7292747138916	EMP2;CYP4F12
Retinal Ganglion Cell Axon Guidance (GO:0031290)	2/5	0.046665	0.965698	8.39519601178337	25.7292747138916	NELL1;SLIT2
Short-Chain Fatty Acid Catabolic Process (GO:0019626)	2/5	0.046665	0.965698	8.39519601178337	25.7292747138916	PCCA;PCK1
Telencephalon Cell Migration (GO:0022029)	2/5	0.046665	0.965698	8.39519601178337	25.7292747138916	HTR6;FGF13
Xenobiotic Transport Across Blood-Brain Barrier (GO:1990962)	2/5	0.046665	0.965698	8.39519601178337	25.7292747138916	ABCC1;ABCG2
LBD Domain Binding (GO:0050693)	2/5	0.046665	0.982896	8.39519601178337	25.7292747138916	RXRA;PPARG
[Heparan Sulfate]-Glucosamine 3-Sulfotransferase 1 Activity (GO:0008467)	2/5	0.046665	0.982896	8.39519601178337	25.7292747138916	HS3ST4;HS3ST2
Carnitine O-acyltransferase Activity (GO:0016406)	2/5	0.046665	0.982896	8.39519601178337	25.7292747138916	CROT;CPT1C
deSUMOylase Activity (GO:0016929)	2/5	0.046665	0.982896	8.39519601178337	25.7292747138916	SENP5;SENP3
HDL Cholesterol And Triglyceride Levels (Pleiotropy)	2/5	0.046665	0.614009	8.39519601178337	25.7292747138916	LRFN2;GALNTL6
Disease Severity In Uveal Melanoma (TNM Stage 3 Or 4 Vs TNM Stage 1 Or 2)	2/5	0.046665	0.614009	8.39519601178337	25.7292747138916	MAGI1;WDR70
Non(never)-lesional Skin FLG Expression Levels In Childhood Atopic Dermatitis	2/5	0.046665	0.614009	8.39519601178337	25.7292747138916	NTM;RNF150
Mitral Valve Prolapse After Mitral Valve Surgery	2/5	0.046665	0.614009	8.39519601178337	25.7292747138916	LMCD1;SMG6
Betaine Levels In Elite Athletes	2/5	0.046665	0.614009	8.39519601178337	25.7292747138916	RPS6KA2;GALNTL6
Kininogen-1 Levels	2/5	0.046665	0.614009	8.39519601178337	25.7292747138916	TBCCD1;DNAJB11
Androstenediol (3Alpha, 17Alpha) Monosulfate (3) Levels In Elite Athletes	2/5	0.046665	0.614009	8.39519601178337	25.7292747138916	RBFOX1;TMPRSS11E
Phosphatidylinositol (16:0 16:1) Levels	2/5	0.046665	0.614009	8.39519601178337	25.7292747138916	SCARB2;FAM47E
Proteinuria In Preeclampsia	2/5	0.046665	0.614009	8.39519601178337	25.7292747138916	RARB;SMG6
Brain-derived Neurotrophic Factor Levels	2/5	0.046665	0.614009	8.39519601178337	25.7292747138916	BRD3;RUNX1
Cortex Volume Change Rate	2/5	0.046665	0.614009	8.39519601178337	25.7292747138916	LRRTM4;MAGI2
Metabolite Peak Levels (QI9680)	2/5	0.046665	0.614009	8.39519601178337	25.7292747138916	GPAM;PYROXD2
Gut Microbiota Relative Abundance (Bacteroides)	2/5	0.046665	0.614009	8.39519601178337	25.7292747138916	CTNNA2;LINC01411
Prepulse Inhibition Of The Startle Response	2/5	0.046665	0.614009	8.39519601178337	25.7292747138916	BMPR1B;LINC01411
Urinary Potassium Excretion	2/5	0.046665	0.614009	8.39519601178337	25.7292747138916	PPP3R1;AHR
Normalized Brain Volume	2/5	0.046665	0.614009	8.39519601178337	25.7292747138916	FOXO3;BICD1
Metabolite Levels (HVA/5-HIAA Ratio)	2/5	0.046665	0.614009	8.39519601178337	25.7292747138916	ANKS1B;PTPRG
Insulin-like Growth Factors	2/5	0.046665	0.614009	8.39519601178337	25.7292747138916	FOXO3;SORCS2
Depressive And Manic Episodes In Bipolar Disorder	2/5	0.046665	0.614009	8.39519601178337	25.7292747138916	RNLS;SORCS2
Response To Bupropion And Depression	2/5	0.046665	0.614009	8.39519601178337	25.7292747138916	BHLHE41;SSPN
Adiponectin Levels X Mediterranean Diet Adherence Interaction	2/5	0.046665	0.614009	8.39519601178337	25.7292747138916	PDE11A;SLIT2
Interferon Alpha Levels In Systemic Lupus Erythematosus	2/5	0.046665	0.614009	8.39519601178337	25.7292747138916	ANKRD44;PRKG1
Incident Atrial Fibrillation	2/5	0.046665	0.614009	8.39519601178337	25.7292747138916	ZFHX3;NEURL1
Residual Cognition	2/5	0.046665	0.614009	8.39519601178337	25.7292747138916	UNC5C;AHR
Glycosyl Ceramide (D18:2/24:1, D18:1/24:2) Levels In Elite Athletes	2/5	0.046665	0.614009	8.39519601178337	25.7292747138916	SV2B;PRKG1
Salicylate Levels In Elite Athletes	2/5	0.046665	0.614009	8.39519601178337	25.7292747138916	EIPR1;RARB
1,3-Dimethylurate Levels In Elite Athletes	2/5	0.046665	0.614009	8.39519601178337	25.7292747138916	SLIT2;ABCG2
Lamb Liking	2/5	0.046665	0.614009	8.39519601178337	25.7292747138916	KIRREL3;CCDC171
Vaginal Microbiome Relative Abundance (G Dialister)	2/5	0.046665	0.614009	8.39519601178337	25.7292747138916	KIRREL3;RARB
Fetuin-B Levels	2/5	0.046665	0.614009	8.39519601178337	25.7292747138916	FETUB;HRG
Cathepsin Z Levels	2/5	0.046665	0.614009	8.39519601178337	25.7292747138916	GNPTAB;WASHC3
Dementia In APOE E4+ Carriers	2/5	0.046665	0.614009	8.39519601178337	25.7292747138916	PPIL2;RPS6KA2
pyruvate decarboxylation to acetyl CoA Homo sapiens PYRUVDEHYD-PWY	2/5	0.046665	0.805606	8.39519601178337	25.7292747138916	PDHA2;PDHA1
PELP1	2/5	0.046665	0.957565	8.39519601178337	25.7292747138916	NOL9;SENP3
PRKAB1	2/5	0.046665	0.957565	8.39519601178337	25.7292747138916	PRKAG1;PRKAG2
CSPP1	2/5	0.046665	0.957565	8.39519601178337	25.7292747138916	CCDC138;CCDC14
PMC1280267 F7	2/5	0.046665	0.772861	8.39519601178337	25.7292747138916	SEMA3A;FYN
PMC1828075 F2	2/5	0.046665	0.772861	8.39519601178337	25.7292747138916	BMP4;BMP7
PMC8014260 F1	2/5	0.046665	0.772861	8.39519601178337	25.7292747138916	IRF3;TRAF6
PMC1965265 F6	2/5	0.046665	0.772861	8.39519601178337	25.7292747138916	BMP4;BMP7
PMC7226887 F1	2/5	0.046665	0.772861	8.39519601178337	25.7292747138916	PTEN;FOXO3
PMC7432778 F6	2/5	0.046665	0.772861	8.39519601178337	25.7292747138916	FLG;TRAF6
PMC7720132 F6	2/5	0.046665	0.772861	8.39519601178337	25.7292747138916	TRAF6;ATG9A
PMC7186465 F1	2/5	0.046665	0.772861	8.39519601178337	25.7292747138916	TRAF6;TFF1
PMC7387847 F10	2/5	0.046665	0.772861	8.39519601178337	25.7292747138916	KEAP1;GCLM
PMC2769250 F3a	2/5	0.046665	0.772861	8.39519601178337	25.7292747138916	ABCB6;CPOX
PMC2775047 F1	2/5	0.046665	0.772861	8.39519601178337	25.7292747138916	TRAF6;TIRAP
PMC7470069 F5	2/5	0.046665	0.772861	8.39519601178337	25.7292747138916	PTEN;KEAP1
PMC7504460 F1	2/5	0.046665	0.772861	8.39519601178337	25.7292747138916	ADIPOR1;SHBG
PMC2810075 F6	2/5	0.046665	0.772861	8.39519601178337	25.7292747138916	PTEN;FOXO3
PMC8006404 F7	2/5	0.046665	0.772861	8.39519601178337	25.7292747138916	BMP4;PAX7
PMC2905406 F10	2/5	0.046665	0.772861	8.39519601178337	25.7292747138916	GDNF;FYN
PMC6526672 F2	2/5	0.046665	0.772861	8.39519601178337	25.7292747138916	SIRT2;HK1
PMC2955448 F1	2/5	0.046665	0.772861	8.39519601178337	25.7292747138916	PTEN;MAPK1
PMC7506081 F2	2/5	0.046665	0.772861	8.39519601178337	25.7292747138916	LDLR;ABCG1
PMC3031497 F7	2/5	0.046665	0.772861	8.39519601178337	25.7292747138916	VAPB;RAE1
PMC3039708 F2	2/5	0.046665	0.772861	8.39519601178337	25.7292747138916	TRAF6;PTEN
PMC3101043 F2	2/5	0.046665	0.772861	8.39519601178337	25.7292747138916	TRAF6;TIRAP
PMC3126159 F4	2/5	0.046665	0.772861	8.39519601178337	25.7292747138916	APAF1;IRF3
PMC7492540 F1	2/5	0.046665	0.772861	8.39519601178337	25.7292747138916	WNT7B;PTEN
PMC7369905 F4	2/5	0.046665	0.772861	8.39519601178337	25.7292747138916	CD80;FOXO1
PMC7809757 F1	2/5	0.046665	0.772861	8.39519601178337	25.7292747138916	EDAR;TRAF6
PMC3179880 F2	2/5	0.046665	0.772861	8.39519601178337	25.7292747138916	GDNF;BDNF
PMC3182762 F1	2/5	0.046665	0.772861	8.39519601178337	25.7292747138916	TRAF6;TIRAP
PMC3185611 F1	2/5	0.046665	0.772861	8.39519601178337	25.7292747138916	IRF3;TRAF6
PMC3278537 F2	2/5	0.046665	0.772861	8.39519601178337	25.7292747138916	BDNF;PTEN
PMC7108857 F10	2/5	0.046665	0.772861	8.39519601178337	25.7292747138916	IRF3;TRAF6
PMC7854028 F3	2/5	0.046665	0.772861	8.39519601178337	25.7292747138916	PTEN;ABL1
PMC3341446 F1	2/5	0.046665	0.772861	8.39519601178337	25.7292747138916	PTEN;FOXO3
PMC7408991 F4	2/5	0.046665	0.772861	8.39519601178337	25.7292747138916	KEAP1;FOXO3
PMC3426219 F2	2/5	0.046665	0.772861	8.39519601178337	25.7292747138916	HGF;CSPG4
PMC7189493 F7	2/5	0.046665	0.772861	8.39519601178337	25.7292747138916	CAV3;CD33
PMC3446651 F2	2/5	0.046665	0.772861	8.39519601178337	25.7292747138916	IRF3;TRAF6
PMC3502106 F5	2/5	0.046665	0.772861	8.39519601178337	25.7292747138916	BMP4;WNT7B
PMC7141137 F3	2/5	0.046665	0.772861	8.39519601178337	25.7292747138916	ZBTB14;EVX1
PMC3545532 F2	2/5	0.046665	0.772861	8.39519601178337	25.7292747138916	PTEN;FYN
PMC7281113 F1	2/5	0.046665	0.772861	8.39519601178337	25.7292747138916	PTEN;TFF1
PMC7803547 F2	2/5	0.046665	0.772861	8.39519601178337	25.7292747138916	CD80;KEAP1
PMC3594407 F8	2/5	0.046665	0.772861	8.39519601178337	25.7292747138916	IRF3;PTEN
PMC3606047 F1	2/5	0.046665	0.772861	8.39519601178337	25.7292747138916	ADORA1;AHR
PMC7926305 F5	2/5	0.046665	0.772861	8.39519601178337	25.7292747138916	RRAS;MAPK1
PMC7464720 F3	2/5	0.046665	0.772861	8.39519601178337	25.7292747138916	RYR1;RYR3
PMC3656004 F11	2/5	0.046665	0.772861	8.39519601178337	25.7292747138916	RYR1;PTEN
PMC3678733 F1	2/5	0.046665	0.772861	8.39519601178337	25.7292747138916	NPHP4;AMOT
PMC7229175 F7	2/5	0.046665	0.772861	8.39519601178337	25.7292747138916	ARF3;TIRAP
PMC6488418 F4	2/5	0.046665	0.772861	8.39519601178337	25.7292747138916	KEAP1;FYN
PMC3708280 F1	2/5	0.046665	0.772861	8.39519601178337	25.7292747138916	BMP4;WNT1
PMC7017171 F1	2/5	0.046665	0.772861	8.39519601178337	25.7292747138916	PTEN;PCK1
PMC7055192 F3	2/5	0.046665	0.772861	8.39519601178337	25.7292747138916	LDLR;ABCG1
PMC3742659 F2	2/5	0.046665	0.772861	8.39519601178337	25.7292747138916	SEMA3A;PTEN
PMC3773342 F9	2/5	0.046665	0.772861	8.39519601178337	25.7292747138916	BMP4;GDNF
PMC3787923 F2	2/5	0.046665	0.772861	8.39519601178337	25.7292747138916	PTEN;MAPK1
PMC3791171 F2	2/5	0.046665	0.772861	8.39519601178337	25.7292747138916	PTEN;FOXO3
PMC5830900 F1	2/5	0.046665	0.772861	8.39519601178337	25.7292747138916	BMP4;HGF
PMC3813872 F7	2/5	0.046665	0.772861	8.39519601178337	25.7292747138916	PTEN;ABL1
PMC7796017 F1	2/5	0.046665	0.772861	8.39519601178337	25.7292747138916	PTEN;FOXO1
PMC7918973 F1	2/5	0.046665	0.772861	8.39519601178337	25.7292747138916	KEAP1;GCLM
PMC3861374 F4	2/5	0.046665	0.772861	8.39519601178337	25.7292747138916	HGF;PTEN
PMC7695496 F2	2/5	0.046665	0.772861	8.39519601178337	25.7292747138916	IRF3;KLF4
PMC4085347 F4	2/5	0.046665	0.772861	8.39519601178337	25.7292747138916	FGR;FYN
PMC4110478 F1	2/5	0.046665	0.772861	8.39519601178337	25.7292747138916	PTEN;ADM
PMC4151049 F2	2/5	0.046665	0.772861	8.39519601178337	25.7292747138916	PTEN;FYN
PMC4174300 F2	2/5	0.046665	0.772861	8.39519601178337	25.7292747138916	IRF3;TRAF6
PMC4174300 F3	2/5	0.046665	0.772861	8.39519601178337	25.7292747138916	IRF3;TRAF6
PMC4181723 F7	2/5	0.046665	0.772861	8.39519601178337	25.7292747138916	IRF3;TRAF6
PMC4300671 F1	2/5	0.046665	0.772861	8.39519601178337	25.7292747138916	M6PR;ACTN4
PMC4393236 F4	2/5	0.046665	0.772861	8.39519601178337	25.7292747138916	ICMT;MVD
PMC4452063 F2	2/5	0.046665	0.772861	8.39519601178337	25.7292747138916	BCL9;SOST
PMC4490154 F1	2/5	0.046665	0.772861	8.39519601178337	25.7292747138916	SET;PTEN
PMC4546755 F1	2/5	0.046665	0.772861	8.39519601178337	25.7292747138916	KEAP1;AHR
PMC4589430 F2	2/5	0.046665	0.772861	8.39519601178337	25.7292747138916	CD68;CD33
PMC4628872 F1	2/5	0.046665	0.772861	8.39519601178337	25.7292747138916	KEAP1;GCLM
PMC4632302 F9	2/5	0.046665	0.772861	8.39519601178337	25.7292747138916	ENDOG;APAF1
PMC4657516 F5	2/5	0.046665	0.772861	8.39519601178337	25.7292747138916	PTEN;KEAP1
PMC4714567 F6	2/5	0.046665	0.772861	8.39519601178337	25.7292747138916	KLF6;AHR
PMC4715152 F3	2/5	0.046665	0.772861	8.39519601178337	25.7292747138916	WWOX;HGF
PMC4720504 F1	2/5	0.046665	0.772861	8.39519601178337	25.7292747138916	APAF1;ATG4D
PMC4777846 F7	2/5	0.046665	0.772861	8.39519601178337	25.7292747138916	NCEH1;ABCG1
PMC4810129 F2	2/5	0.046665	0.772861	8.39519601178337	25.7292747138916	DLG1;PTEN
PMC4841712 F1	2/5	0.046665	0.772861	8.39519601178337	25.7292747138916	PIM1;HDAC8
PMC4878851 F5	2/5	0.046665	0.772861	8.39519601178337	25.7292747138916	CAV3;FOXO1
PMC4923163 F3	2/5	0.046665	0.772861	8.39519601178337	25.7292747138916	BDNF;PTEN
PMC5003773 F1	2/5	0.046665	0.772861	8.39519601178337	25.7292747138916	PTEN;FOXO1
PMC5039077 F23	2/5	0.046665	0.772861	8.39519601178337	25.7292747138916	IRF3;TRAF6
PMC5209581 F5	2/5	0.046665	0.772861	8.39519601178337	25.7292747138916	PTEN;FOXO1
PMC5214845 F3	2/5	0.046665	0.772861	8.39519601178337	25.7292747138916	IRF3;TRAF6
PMC5289082 F5	2/5	0.046665	0.772861	8.39519601178337	25.7292747138916	IRF3;TRAF6
PMC5292650 F1	2/5	0.046665	0.772861	8.39519601178337	25.7292747138916	CD68;CD33
PMC5357236 F1	2/5	0.046665	0.772861	8.39519601178337	25.7292747138916	CYP7A1;ABCG1
PMC5357299 F8	2/5	0.046665	0.772861	8.39519601178337	25.7292747138916	TRAF6;TIRAP
PMC5357501 F4	2/5	0.046665	0.772861	8.39519601178337	25.7292747138916	BACE1;RARB
PMC5382886 F1	2/5	0.046665	0.772861	8.39519601178337	25.7292747138916	TRAF6;TIRAP
PMC5393948 F6	2/5	0.046665	0.772861	8.39519601178337	25.7292747138916	FOXO3;FOXO1
PMC5541270 F8	2/5	0.046665	0.772861	8.39519601178337	25.7292747138916	TRAF6;MUC13
PMC5615147 F2	2/5	0.046665	0.772861	8.39519601178337	25.7292747138916	KEAP1;AHR
PMC5679221 F1	2/5	0.046665	0.772861	8.39519601178337	25.7292747138916	ILK;FYN
PMC5696504 F7	2/5	0.046665	0.772861	8.39519601178337	25.7292747138916	BCL9;SOST
PMC5764779 F4	2/5	0.046665	0.772861	8.39519601178337	25.7292747138916	PLEK;THSD4
PMC5772162 F2	2/5	0.046665	0.772861	8.39519601178337	25.7292747138916	BDNF;M6PR
PMC5800892 F7	2/5	0.046665	0.772861	8.39519601178337	25.7292747138916	TRAF6;CD80
PMC5824910 F1	2/5	0.046665	0.772861	8.39519601178337	25.7292747138916	PTEN;AMOT
PMC5944465 F3	2/5	0.046665	0.772861	8.39519601178337	25.7292747138916	APAF1;TRAF6
PMC6026538 F1	2/5	0.046665	0.772861	8.39519601178337	25.7292747138916	LDLR;ABCG1
PMC6106977 F2	2/5	0.046665	0.772861	8.39519601178337	25.7292747138916	PTEN;RPA1
PMC6128059 F1	2/5	0.046665	0.772861	8.39519601178337	25.7292747138916	GDNF;FYN
PMC6134416 F3	2/5	0.046665	0.772861	8.39519601178337	25.7292747138916	HGF;PTEN
PMC6192633 F8	2/5	0.046665	0.772861	8.39519601178337	25.7292747138916	TRAF6;TIRAP
PMC6266939 F1	2/5	0.046665	0.772861	8.39519601178337	25.7292747138916	ILK;AMOT
PMC6278507 F6	2/5	0.046665	0.772861	8.39519601178337	25.7292747138916	PTEN;ILK
PMC6287621 F1	2/5	0.046665	0.772861	8.39519601178337	25.7292747138916	HGF;BMP7
PMC6319021 F5	2/5	0.046665	0.772861	8.39519601178337	25.7292747138916	SEMA3A;FYN
PMC6412963 F1	2/5	0.046665	0.772861	8.39519601178337	25.7292747138916	ABCG5;LDLR
PMC6457004 F5	2/5	0.046665	0.772861	8.39519601178337	25.7292747138916	WNT7B;SOST
PMC6491684 F8	2/5	0.046665	0.772861	8.39519601178337	25.7292747138916	BDNF;DCX
PMC6492940 F5	2/5	0.046665	0.772861	8.39519601178337	25.7292747138916	ENDOG;APAF1
PMC6509151 F4	2/5	0.046665	0.772861	8.39519601178337	25.7292747138916	FOXO1;RAG1
PMC6529190 F10	2/5	0.046665	0.772861	8.39519601178337	25.7292747138916	PTEN;ADIPOR1
PMC6562915 F2	2/5	0.046665	0.772861	8.39519601178337	25.7292747138916	FYN;FOXO1
PMC6584916 F7	2/5	0.046665	0.772861	8.39519601178337	25.7292747138916	SLIT3;SLIT2
PMC6591367 F7	2/5	0.046665	0.772861	8.39519601178337	25.7292747138916	PTEN;FOXO1
PMC6608078 F2	2/5	0.046665	0.772861	8.39519601178337	25.7292747138916	PTEN;IL6ST
PMC6712945 F5	2/5	0.046665	0.772861	8.39519601178337	25.7292747138916	NPS;CCR2
PMC6770264 F1	2/5	0.046665	0.772861	8.39519601178337	25.7292747138916	BMP4;HGF
PMC6854988 F11	2/5	0.046665	0.772861	8.39519601178337	25.7292747138916	RXRA;AHR
PMC6858087 F1	2/5	0.046665	0.772861	8.39519601178337	25.7292747138916	IRF3;TRAF6
PMC6888217 F3	2/5	0.046665	0.772861	8.39519601178337	25.7292747138916	CD80;CD68
Activated NTRK2 Signals Thru CDK5 R-HSA-9032845	2/5	0.046665	0.999865	8.39519601178337	25.7292747138916	RNASE1;CDK5R1
MECP2 Regulates Transcription Factors R-HSA-9022707	2/5	0.046665	0.999865	8.39519601178337	25.7292747138916	RBFOX1;PPARG
N-glycan Trimming And Elongation In cis-Golgi R-HSA-964739	2/5	0.046665	0.999865	8.39519601178337	25.7292747138916	MAN1A2;MAN1A1
NR1H2 And NR1H3 Regulate Gene Expression Linked To Triglyceride Lipolysis In Adipose R-HSA-9031528	2/5	0.046665	0.999865	8.39519601178337	25.7292747138916	RXRB;RXRA
NR1H2 And NR1H3 Regulate Gene Expression To Limit Cholesterol Uptake R-HSA-9031525	2/5	0.046665	0.999865	8.39519601178337	25.7292747138916	RXRB;RXRA
Toxicity Of Botulinum Toxin Type D (botD) R-HSA-5250955	2/5	0.046665	0.999865	8.39519601178337	25.7292747138916	SV2C;SV2B
Toxicity Of Botulinum Toxin Type F (botF) R-HSA-5250981	2/5	0.046665	0.999865	8.39519601178337	25.7292747138916	SV2C;SV2B
Phosphatidylcholine Levels	8/55	0.0470798	0.614009	2.14712076101953	6.56140930960538	DOCK6;SCARB1;COL5A1;GPAM;POLR1HASP;TMPRSS11E;CD300LG;UBE2L3
Visceral Fat	8/55	0.0470798	0.614009	2.14712076101953	6.56140930960538	CARMIL1;CRYBG1;SV2C;CAV3;PSAT1;MAGI2;SGCZ;RAD18
PMC6241693-copd-13-3733.nxml--PIK3CA PIK3CA	8/55	0.0470798	0.999995	2.14712076101953	6.56140930960538	ELF1;KLF6;HMGA1;HOXA2;HOXA1;EVX1;FOXO3;FOXO1
Calcium Levels	31/308	0.0476038	0.617968	1.4163791765348	4.31265194709698	DNAH2;PKN3;RAB3D;PRKAG2;ECE1;HAPLN3;SCFD2;CHRNE;PRKG1;KIRREL3;SLC12A2;MBNL1;ZFHX3;PTPRN2;TBCCD1;CAMK1D;AHSG;HGF;HPS1;SND1;TIRAP;MAP1A;DNAJB11;PDE3A;RARB;PPARG;RAB38;PYROXD2;MELTF;ZFPM1;SLC25A11
Arrhythmogenic right ventricular cardiomyopathy (ARVC)	10/75	0.0477906	0.999939	1.94142699405857	5.90373652856005	CACNB3;SGCD;DES;ITGB5;ITGA1;DMD;ACTN4;CTNNA2;SGCG;ITGA9
PMC7057487 F4	9/65	0.0478838	0.772861	2.02770052693208	6.16213869577826	PTPRR;LAMC3;NRG4;ADORA1;PRKG2;MAPK1;THBS2;GLI3;ITGA9
PMC4918128 F7	9/65	0.0478838	0.772861	2.02770052693208	6.16213869577826	RANBP2;HNRNPL;MAGI2;PTEN;FBLN1;TP53;THBS1;KALRN;LRPPRC
Hematocrit	52/559	0.0484394	0.618659	1.3006369656616	3.93760136526233	SPO11;CEP164;PRKAG2;ZBTB20;CHD3;FBXO22;NR2E3;UBE2L3;HK1;UBE2Q2;PIEZO1;SBF2;MBNL1;PLEKHG1;UBE2E3;ITGA1;NOSIP;SHROOM3;AMPD3;YDJC;RUNX1;NCOR2;NRG4;CCDC192;LUCAT1;PPARG;PRR12;ZFPM1;PKDCC;DNAH2;STX16;LINC01290;MLLT3;KALRN;DYNC2LI1;FGD5;RXRA;LINC01968;CALD1;PRRG2;TP53BP1;PCK1;WWOX;EGLN3;RNLS;BDNF;WNT7B;MYO9A;DCDC1;NDUFAF6;PNPLA3;BMPR1B
Severe COVID-19 Infection	40/415	0.048956	0.618659	1.35116073505466	4.07622734082601	LINC01010;TENM2;MARCHF1;SEMA3A;PCDH11X;PRKAG2;PRR5L;OSBPL11;PCSK6;SIPA1L2;THSD4;FARS2;SNX4;PDZD2;MTHFD1L;RPS6KA2;DLGAP1;DMD;MALRD1;HTATIP2;MAGI1;KIRREL3;WWOX;RBFOX1;EPHA7;ZFHX3;HELQ;VTA1;MAGI2;SFTPD;CADPS;SYNJ2;NMBR;PLXDC2;SORCS2;HS3ST4;NFASC;DIAPH2;GAS2;RIMBP2
Brain Morphology (MOSTest)	44/463	0.0491907	0.618659	1.33069005312726	4.0081057192132	NRP2;RABGAP1;PKDCC;SEMA3A;WWC1;PRKAG2;FOXO3;BICD1;GLI3;THSD4;ARHGAP35;SMG6;UBE2L3;TUBA1B;DRAM1;SH3PXD2A;AP2S1;REV3L;CRMA;SLC12A8;MFSD4B;MPDU1;WWOX;COL26A1;GABBR1;ZFHX3;RNLS;CADPS;SHROOM3;ACTN4;AMPD3;KIF6;IQCJ;SND1;DCDC1;SH3RF3;COL2A1;PCCA;PAX7;KIF26B;SHBG;NBL1;ABCG2;MCPH1
Protein Folding R-HSA-391251	12/96	0.0492168	0.999865	1.80336364525276	5.43086491863776	NOP56;TUBA1B;GNG10;CCNE2;PDCL;GNG8;FBXO6;TP53;TUBA4A;PFDN6;CCT5;WRAP53
Syndecan 1 pathway	7/46	0.0497501	0.999939	2.26354636722986	6.79232179036348	SDCBP;COL2A1;COL5A1;HGF;COL11A2;MAPK1;COL9A3
Syndecan-1-mediated signaling events Homo sapiens f957cc16-6195-11e5-8ac5-06603eb7f303	7/46	0.0497501	0.991991	2.26354636722986	6.79232179036348	SDCBP;COL2A1;COL5A1;HGF;COL11A2;MAPK1;COL9A3
NR1H2 And NR1H3-mediated Signaling R-HSA-9024446	7/46	0.0497501	0.999865	2.26354636722986	6.79232179036348	RXRB;NCOR2;ABCG5;RXRA;FABP6;PCK1;ABCG1
PMC9528698-NIHMS1835045-supplement-Supp Table 20 2.xlsx-TTN control-Gene TTN	41/428	0.0505564	0.999995	1.3420452412917	4.00555766474398	DOCK5;PLEKHH2;ITGB5;TENM4;NTM;PIGZ;FOXO3;MLLT3;PCSK6;KALRN;GLI3;THSD4;NPAS3;DYNC2LI1;FGD5;SLC22A15;PDZD2;TP53INP1;SHOC1;RIMKLB;KIRREL3;CARMIL1;ZFHX3;OSBPL6;MME;HEG1;MAGI2;ITGA1;SHROOM3;PLXDC2;PARD3B;MYO1D;SH3RF3;BMP4;ELF1;RGCC;NDUFAF6;YPEL1;KCNQ3;PI16;CCDC171
LDL (Standard GWA)	11/86	0.0505723	0.618659	1.85108983128135	5.52430257904129	DYNC2LI1;TSPAN16;CARMIL1;ABCG5;GABBR1;SGCD;PKN3;TMPRSS11E;SPC24;DNM2;FAM118B
PMC8351524-CTM2-11-e522-s024.docx-0-KIT KIT	11/86	0.0505723	0.999995	1.85108983128135	5.52430257904129	PDP1;DISP3;GPAM;ABCB4;ANGPTL8;PRKAG2;MVD;PPARG;ADIPOR1;LDLR;RAN
BL1860 (TRIP6)	13/107	0.0507193	0.999929	1.74605800058292	5.20578339973509	FLG;WIZ;TUBA4A;RXRB;DNAJA1;ILF3;ELF1;KIFC1;CNOT2;VPS52;TP53BP1;CCT5;GTF2I
Recycling pathway of cell adhesion molecule L1	5/28	0.0511983	0.999939	2.74019665916361	8.14399686938788	RPS6KA2;AP2S1;MAPK1;AP2A1;DNM2
MTOR/TP53 Regulates Cell Metabolism	5/28	0.0511983	0.984226	2.74019665916361	8.14399686938788	PDHA1;PCK1;CPT1C;TP53;FOXO1
Glutamine in Cancer Metabolism	5/28	0.0511983	0.984226	2.74019665916361	8.14399686938788	GOT1;PSAT1;SLC1A5;GCLM;TP53
Regulation Of Cardiac Muscle Cell Action Potential (GO:0098901)	5/28	0.0511983	0.965698	2.74019665916361	8.14399686938788	DLG1;CAV3;ANK2;FGF13;HCN1
Coffee Consumption (Cups Per Day)	5/28	0.0511983	0.618659	2.74019665916361	8.14399686938788	CYP2A6;LINC02888;AHR;FOXO3;ABCG2
Epstein-Barr Virus Copy Number In Lymphoblastoid Cell Lines	5/28	0.0511983	0.618659	2.74019665916361	8.14399686938788	WWOX;SLC22A15;SLC35F3;CPQ;FAM184A
Retinoic acid receptors-mediated signaling Homo sapiens 5797691b-6195-11e5-8ac5-06603eb7f303	5/28	0.0511983	0.991991	2.74019665916361	8.14399686938788	NCOR2;RXRA;VDR;MAPK1;RARB
PMC6896028 F1	5/28	0.0511983	0.772861	2.74019665916361	8.14399686938788	PSAT1;KEAP1;PTGR1;GCLM;ABCG2
PMC4770718 F1	5/28	0.0511983	0.772861	2.74019665916361	8.14399686938788	IRF3;TRAF6;ILK;MAPK1;ARRB2
PMC6431671 F7	5/28	0.0511983	0.772861	2.74019665916361	8.14399686938788	LSM6;ABL1;A2M;HRG;TP53
Keratan Sulfate Biosynthesis R-HSA-2022854	5/28	0.0511983	0.999865	2.74019665916361	8.14399686938788	ACAN;CHST1;ST3GAL6;CHST5;B4GALT4
Recycling Pathway Of L1 R-HSA-437239	5/28	0.0511983	0.999865	2.74019665916361	8.14399686938788	RPS6KA2;AP2S1;MAPK1;AP2A1;DNM2
PMC3470785-NIHMS377161-supplement-12.pdf-102-PLK3 PLK3	5/28	0.0511983	0.999995	2.74019665916361	8.14399686938788	SSPN;EMP2;ATF5;AHDC1;CDK5R1
Bovine papillomavirus type 1	5/28	0.0511983	0.276187	2.74019665916361	8.14399686938788	MAGI1;RANBP2;DLG1;RPA1;FBLN1
TNFRSF19	6/37	0.051479	0.954599	2.44026650834488	7.23925087797668	FLG;NOP56;CRNN;KLK10;LGR4;PLD2
Cognitive Decline Rate In Late Mild Cognitive Impairment	6/37	0.051479	0.618659	2.44026650834488	7.23925087797668	TMEM132D;HIRA;RBFOX1;CADPS;EIF4G3;C22ORF39
Shingles	6/37	0.051479	0.618659	2.44026650834488	7.23925087797668	NFASC;MARCHF1;HCP5B;TRIM39;OR11A1;PRKG1
PMC2790076 F5	6/37	0.051479	0.772861	2.44026650834488	7.23925087797668	IRF3;CD80;TRAF6;SPP1;MAPK1;TIRAP
Interactions Of Rev With Host Cellular Proteins R-HSA-177243	6/37	0.051479	0.999865	2.44026650834488	7.23925087797668	RANBP2;NUP188;NUP62;NUP54;RAN;NUP37
Genetic Causes Of Porto Sinusoidal Vascular Disease WP5269	6/37	0.051479	0.995023	2.44026650834488	7.23925087797668	DOCK6;ARHGAP31;NOX3;MAPK1;CYBA;GTF2I
PMC3556652-gm377.pdf-7-NTRK2 NTRK2	8/56	0.0515329	0.999995	2.10227531285552	6.2343689062431	TENM2;SDC2;PTEN;PIEZO2;PLCH1;SLIT2;KALRN;ST6GALNAC5
PMC7796526-12917 2020 2707 MOESM3 ESM.xlsx-Sheet1-ACVR2A ACVR2A	8/56	0.0515329	0.999995	2.10227531285552	6.2343689062431	NCOR2;BDNF;B3GALT4;M6PR;IL6ST;KLF4;BMPR1B;TP53
PMC9528698-NIHMS1835045-supplement-Supp Table 28 10.xlsx-TTN control-Gene TTN	10/76	0.0515592	0.999995	1.91190786884567	5.66885248445219	CARMIL1;NFASC;RPS6KA2;KCNQ3;PPM1H;RAPGEF5;FOXO3;PLXDC2;KALRN;FOXO1
Vertex-wise Cortical Thickness	39/405	0.0519105	0.618659	1.34950385257334	3.99214946563948	PKDCC;ITGB5;LAMC3;PRKAG2;FNBP1L;FOXO3;GLI3;THSD4;ARHGAP35;SMG6;PDZD2;SH3PXD2A;CHSY1;LINC01968;SLC12A8;WWOX;EGLN3;PLEKHG1;RNLS;ABCA4;CADPS;SHROOM3;ACTN4;PLXDC2;TMEM170A;KIF6;SND1;DCDC1;SH3RF3;BMP4;SPATA16;PCCA;SLCO1A2;PLCH1;CD68;EIF4G3;NBL1;MCPH1;CCDC171
Beta-1 integrin cell surface interactions	9/66	0.0519796	0.999939	1.99201898188093	5.89020812622363	COL2A1;COL5A1;ITGA1;COL11A2;SPP1;CSPG4;THBS2;THBS1;ITGA9
Beta1 integrin cell surface interactions Homo sapiens 2fd0bc63-618d-11e5-8ac5-06603eb7f303	9/66	0.0519796	0.991991	1.99201898188093	5.89020812622363	COL2A1;COL5A1;ITGA1;COL11A2;SPP1;CSPG4;THBS2;THBS1;ITGA9
Signaling events mediated by HDAC Class I Homo sapiens 97e84126-6195-11e5-8ac5-06603eb7f303	9/66	0.0519796	0.991991	1.99201898188093	5.89020812622363	NCOR2;RANBP2;PPARG;CHD3;HDAC8;ZFPM1;SIRT2;RAN;HDAC7
EPHB4 human kinase ARCHS4 coexpression	30/299	0.0523718	0.999996	1.41109367875167	4.16186110485437	DOCK6;CHPF;ITGB5;PRKCSH;WIZ;ECE1;SNX33;SLC1A5;STRN4;ABL1;WDR5;PIEZO1;KIF1C;SLC39A7;GTF2I;ICMT;PRMT1;ACTN4;SCAF1;RAD23B;SENP3;SND1;HNRNPL;VANGL1;NCOR2;ILF3;AKT1S1;MFGE8;OBSL1;DOCK1
PMC8009959-41598 2021 86683 MOESM1 ESM.xlsx-XP-CLR LR-gene Name DCLK3	17/151	0.0527046	0.999995	1.60263756765622	4.71664800879299	DOCK5;ANK2;SHISAL1;PARVB;DCDC1;FARS2;DOCK10;EDAR;ELF1;NFASC;RSPH1;ZNF516;KCNQ3;SH3BP4;UBASH3A;DOCK1;ITGA9
Mechanism of Protein Import into the Nucleus Homo sapiens h npcPathway	3/12	0.0530969	0.948896	4.19909297052154	12.3270107251112	RANBP2;NUP62;RAN
ERK inactivation	3/12	0.0530969	0.999939	4.19909297052154	12.3270107251112	DUSP3;MAPK1;DUSP7
LIMS1	3/12	0.0530969	0.954599	4.19909297052154	12.3270107251112	RABGAP1;ILK;PARVB
PDP1	3/12	0.0530969	0.954599	4.19909297052154	12.3270107251112	BMP4;PLEKHG5;SNUPN
PRKAA1	3/12	0.0530969	0.954599	4.19909297052154	12.3270107251112	CUTA;PRKAG1;PRKAG2
FAM116A	3/12	0.0530969	0.954599	4.19909297052154	12.3270107251112	EFNB2;EFNB3;PRKCSH
KLRAQ1	3/12	0.0530969	0.954599	4.19909297052154	12.3270107251112	KBTBD6;KBTBD7;THBS2
V(D)J Recombination	3/12	0.0530969	0.984226	4.19909297052154	12.3270107251112	XRCC4;DNTTIP2;RAG1
IL7R -> FOXO/NF-kB Signaling	3/12	0.0530969	0.984226	4.19909297052154	12.3270107251112	FYN;FOXO3;FOXO1
mRNA Cleavage Involved In mRNA Processing (GO:0098787)	3/12	0.0530969	0.965698	4.19909297052154	12.3270107251112	NCBP2;CSTF2T;CPSF4L
Negative Regulation Of Cardiac Muscle Hypertrophy (GO:0010614)	3/12	0.0530969	0.965698	4.19909297052154	12.3270107251112	CAV3;PPARG;FOXO1
Negative Regulation Of Cell Cycle Phase Transition (GO:1901988)	3/12	0.0530969	0.965698	4.19909297052154	12.3270107251112	RGCC;PTEN;ATF5
Regulation Of T Cell Differentiation In Thymus (GO:0033081)	3/12	0.0530969	0.965698	4.19909297052154	12.3270107251112	BMP4;TESPA1;TOX
Regulation Of Vascular Associated Smooth Muscle Cell Migration (GO:1904752)	3/12	0.0530969	0.965698	4.19909297052154	12.3270107251112	BMP4;DOCK5;PRKG1
GTPase Inhibitor Activity (GO:0005095)	3/12	0.0530969	0.982896	4.19909297052154	12.3270107251112	RNF167;SLIT2;IQGAP2
BMI In Smokers	3/12	0.0530969	0.618659	4.19909297052154	12.3270107251112	DGKG;BDNF;RARB
Emotional Recognition	3/12	0.0530969	0.618659	4.19909297052154	12.3270107251112	MYO1D;ANKRD33B;GLI3
Brain Amyloid Deposition (PET Imaging)	3/12	0.0530969	0.618659	4.19909297052154	12.3270107251112	RYR1;RBFOX1;SHOC1
Help-seeking From A GP	3/12	0.0530969	0.618659	4.19909297052154	12.3270107251112	PPIL1;POLR1HASP;SORCS3
Influenza A (H1N1) Infection	3/12	0.0530969	0.618659	4.19909297052154	12.3270107251112	LINGO2;PTPRR;DMD
IgA Levels	3/12	0.0530969	0.618659	4.19909297052154	12.3270107251112	ANKRD55;CD68;ELL2
Facial Morphology (Factor 6, Height Of Vermillion Lower Lip)	3/12	0.0530969	0.618659	4.19909297052154	12.3270107251112	RBFOX1;DLGAP1;NXPH1
DNA Methylation GrimAge Acceleration	3/12	0.0530969	0.618659	4.19909297052154	12.3270107251112	THSD7B;APRG1;RPS6KA2
Intercellular Adhesion Molecule 1 Levels	3/12	0.0530969	0.618659	4.19909297052154	12.3270107251112	PDE4A;S1PR5;ATG4D
LGALS8	3/12	0.0530969	0.957565	4.19909297052154	12.3270107251112	ATG9A;ATP13A3;ADCY6
PMC6914886 F6	3/12	0.0530969	0.772861	4.19909297052154	12.3270107251112	RXRB;TRAF6;FOXO1
PMC2691965 F2	3/12	0.0530969	0.772861	4.19909297052154	12.3270107251112	IRF3;TRAF6;TIRAP
PMC2739295 F6	3/12	0.0530969	0.772861	4.19909297052154	12.3270107251112	SPP1;WNT1;PTPRG
PMC7076893 F8	3/12	0.0530969	0.772861	4.19909297052154	12.3270107251112	RXRA;MAPK1;PPARG
PMC7065375 F7	3/12	0.0530969	0.772861	4.19909297052154	12.3270107251112	PTEN;ILK;FYN
PMC3180377 F9	3/12	0.0530969	0.772861	4.19909297052154	12.3270107251112	IRF3;TRAF6;TIRAP
PMC7037830 F4	3/12	0.0530969	0.772861	4.19909297052154	12.3270107251112	IRF3;TRAF6;TIRAP
PMC3427795 F1	3/12	0.0530969	0.772861	4.19909297052154	12.3270107251112	PTEN;FOXO3;FOXO1
PMC7456554 F3	3/12	0.0530969	0.772861	4.19909297052154	12.3270107251112	IRF3;TRAF6;TIRAP
PMC3537922 F1	3/12	0.0530969	0.772861	4.19909297052154	12.3270107251112	IRF3;TRAF6;TIRAP
PMC7590701 F6	3/12	0.0530969	0.772861	4.19909297052154	12.3270107251112	BMP4;KLF4;RUNX1
PMC3627353 F2	3/12	0.0530969	0.772861	4.19909297052154	12.3270107251112	BMP4;GDNF;SLIT2
PMC3661706 F1	3/12	0.0530969	0.772861	4.19909297052154	12.3270107251112	IRF3;TRAF6;TIRAP
PMC7866155 F1	3/12	0.0530969	0.772861	4.19909297052154	12.3270107251112	PTEN;MDM4;TP53
PMC3928694 F2	3/12	0.0530969	0.772861	4.19909297052154	12.3270107251112	IRF3;TRAF6;TIRAP
PMC4310697 F4	3/12	0.0530969	0.772861	4.19909297052154	12.3270107251112	IRF3;TRAF6;TIRAP
PMC4405319 F2	3/12	0.0530969	0.772861	4.19909297052154	12.3270107251112	IRF3;TRAF6;TIRAP
PMC4816652 F8	3/12	0.0530969	0.772861	4.19909297052154	12.3270107251112	MINK1;ILK;PAK3
PMC4941807 F4	3/12	0.0530969	0.772861	4.19909297052154	12.3270107251112	HGF;A2M;TP53
PMC5332883 F1	3/12	0.0530969	0.772861	4.19909297052154	12.3270107251112	PTEN;MAPK1;TP53
PMC5623081 F7	3/12	0.0530969	0.772861	4.19909297052154	12.3270107251112	TRAF6;FYN;TIRAP
PMC5677515 F3	3/12	0.0530969	0.772861	4.19909297052154	12.3270107251112	RRAS;ILK;FYN
PMC5779628 F11	3/12	0.0530969	0.772861	4.19909297052154	12.3270107251112	RXRA;BDNF;PPARG
PMC5807041 F11	3/12	0.0530969	0.772861	4.19909297052154	12.3270107251112	MME;EIF4G3;NKX2-3
PMC5876695 F3	3/12	0.0530969	0.772861	4.19909297052154	12.3270107251112	KMT2D;PTEN;FOXO3
PMC5995256 F5	3/12	0.0530969	0.772861	4.19909297052154	12.3270107251112	CDC37;PTEN;ILK
PMC6025837 F6	3/12	0.0530969	0.772861	4.19909297052154	12.3270107251112	RXRB;RXRA;PTEN
PMC6273696 F29	3/12	0.0530969	0.772861	4.19909297052154	12.3270107251112	CDC37;PTEN;ILK
PMC6412338 F3	3/12	0.0530969	0.772861	4.19909297052154	12.3270107251112	PTEN;FOXO3;FOXO1
CD28 Dependent Vav1 Pathway R-HSA-389359	3/12	0.0530969	0.999865	4.19909297052154	12.3270107251112	CD80;FYN;RNASE1
Platelet Adhesion To Exposed Collagen R-HSA-75892	3/12	0.0530969	0.999865	4.19909297052154	12.3270107251112	ITGA1;FYN;GP1BA
PMC3369932-pgen.1002751.s015.pdf-0-BMPR2 BMPR2	3/12	0.0530969	0.999995	4.19909297052154	12.3270107251112	CALD1;CAPRIN2;NPAS3
PMC3369932-pgen.1002751.s015.pdf-0-JAK1 JAK1	3/12	0.0530969	0.999995	4.19909297052154	12.3270107251112	ARID4B;ELK3;RUNX1
PMC2841545-gzq003.nxml--Specificity Screen SHC1 LYN LYN	3/12	0.0530969	0.999995	4.19909297052154	12.3270107251112	BCAR3;ABL1;FYN
PMC9528698-NIHMS1835045-supplement-Supp Table 48.Xlsx-Control TTN-Gene TTN	3/12	0.0530969	0.999995	4.19909297052154	12.3270107251112	RTN4RL1;PLA2G2A;RASSF8
PMC9528698-NIHMS1835045-supplement-Supp Table 59 3.Xlsx-Control TTN-Gene TTN	3/12	0.0530969	0.999995	4.19909297052154	12.3270107251112	ZNF804B;THBS2;MEOX1
PMC9290470-AJMG-185-1266-s001.docx-0-NEK8 NEK8	3/12	0.0530969	0.999995	4.19909297052154	12.3270107251112	RSPH1;NPHP4;PKD2
PMC4590705-13062 2015 86 MOESM1 ESM.xlsx-Gene A - ATM-Unnamed 8 ATM	3/12	0.0530969	0.999995	4.19909297052154	12.3270107251112	EPHA5;SLC10A7;EVX1
MAPK And NFkB Signaling Pathways Inhibited By Yersinia YopJ WP3849	3/12	0.0530969	0.995023	4.19909297052154	12.3270107251112	RRAS;TRAF6;MAPK1
RAC2 GTPase Cycle R-HSA-9013404	11/87	0.0542124	0.999865	1.8266343869249	5.32435610823215	DOCK10;VANGL1;SAMM50;VAPB;STBD1;CDC42EP4;CYBA;DOCK1;ARHGAP35;TMPO;PLD2
SUMOylation R-HSA-2990846	19/174	0.0547539	0.999865	1.54886630873674	4.499312407763	RANBP2;DAXX;PHC1;NUP188;XRCC4;RING1;VDR;CHD3;HIC1;HDAC7;NCOR2;SENP5;RXRA;NUP62;NUP54;PPARG;TP53BP1;TP53;NUP37
PMC3815156-pone.0079298.s006.xlsx-Sheet1-Supplement Table 4 List Of 199 Transcripts That Are Differentially And Uniquely Spliced In HER2 Tumors Compared To Other Tumors ERBB2	14/119	0.0548352	0.999995	1.68352753027188	4.88799117580716	SLC25A1;ACOT7;SET;UBE2E3;PLA2G2A;HDAC8;RAD23B;HOXA10;BACE1;UBE2Q2;STK16;ABL1;FYN;RBM34
TRIM11	7/47	0.0549	0.954599	2.20683833560709	6.40478048492346	LINGO2;RABGAP1;EFNB3;PSMD7;PCBP4;RPS6KA2;PRKAG1
Phosphoglycerides Levels	7/47	0.0549	0.618659	2.20683833560709	6.40478048492346	DOCK6;SCARB1;GPAM;POLR1HASP;TMPRSS11E;CD300LG;UBE2L3
SUMOylation Of RNA Binding Proteins R-HSA-4570464	7/47	0.0549	0.999865	2.20683833560709	6.40478048492346	RANBP2;PHC1;NUP188;RING1;NUP62;NUP54;NUP37
Lissencephaly gene (LIS1) in neuronal migration and development Homo sapiens h Lis1Pathway	4/20	0.0549948	0.948896	3.1502722940776	9.13741606389667	DCTN6;DCX;ABL1;CDK5R1
FLYWCH2	4/20	0.0549948	0.954599	3.1502722940776	9.13741606389667	RXRB;PPARG;BPGM;HDAC7
EPHB4	4/20	0.0549948	0.954599	3.1502722940776	9.13741606389667	EFNB2;MME;TMPRSS3;MRAP2
FKBP6	4/20	0.0549948	0.954599	3.1502722940776	9.13741606389667	PPIL2;PRMT3;PDE4A;FAM118B
ARSG	4/20	0.0549948	0.954599	3.1502722940776	9.13741606389667	DPH1;QRSL1;YDJC;TUBA4A
G99966GV	4/20	0.0549948	0.97601	3.1502722940776	9.13741606389667	ITGA1;PZP;ST3GAL6;THBS1
Cilium-Dependent Cell Motility (GO:0060285)	4/20	0.0549948	0.965698	3.1502722940776	9.13741606389667	CRNN;DNAH2;CCDC65;TEKT5
Alanine Transaminase Levels	4/20	0.0549948	0.618659	3.1502722940776	9.13741606389667	GPAM;ABCB4;PNPLA3;SHROOM3
Exacerbations Requiring Hospitalisation In Asthma	4/20	0.0549948	0.618659	3.1502722940776	9.13741606389667	TENM2;RPS6KA2;SSUH2;LINC01036
PMC3324922 F4	4/20	0.0549948	0.772861	3.1502722940776	9.13741606389667	ELF1;ACTN4;THBS1;DNM2
PMC3398465 F4	4/20	0.0549948	0.772861	3.1502722940776	9.13741606389667	BMP4;EDAR;SEMA3A;GLI3
PMC6627153 F3	4/20	0.0549948	0.772861	3.1502722940776	9.13741606389667	VDR;RPAP3;SPC24;RUNX1
PMC6818723 F14	4/20	0.0549948	0.772861	3.1502722940776	9.13741606389667	NTM;AEN;FYN;TP53
Nef-mediated Downmodulation Of Cell Surface Receptors By Recruitment To Clathrin Adapters R-HSA-164938	4/20	0.0549948	0.999865	3.1502722940776	9.13741606389667	AP2S1;AP2A1;HLA-A;AP1M2
Syndecan Interactions R-HSA-3000170	4/20	0.0549948	0.999865	3.1502722940776	9.13741606389667	ITGB5;SDC2;FGF13;THBS1
Imatinib And Chronic Myeloid Leukemia WP3640	4/20	0.0549948	0.995023	3.1502722940776	9.13741606389667	ABL1;PIM1;FOXO3;ABCG2
Negative Regulation Of Intracellular Signal Transduction (GO:1902532)	24/231	0.0554252	0.965698	1.46587851691821	4.24037872697161	DGKG;ENDOG;DUSP3;CAV3;WWC1;RTKN2;MAGI2;PLEK;PTEN;ARRB2;ADIPOR1;BMP7;THBS1;DUSP7;PDE11A;NUAK2;TRIM39;AKT1S1;PDE3A;SH3BP4;PPARG;SLIT2;TSSK2;OTUD3
RNA Splicing (GO:0008380)	12/98	0.0560722	0.965698	1.76123394298267	5.07431914810701	SMU1;MBNL1;LSM6;DHX8;NCBP2;PRMT1;NOVA1;DDX23;WBP4;SNRPA1;SLU7;SNRPB
PSMC5	8/57	0.0562484	0.954599	2.05926029114718	5.92650567731062	IKBIP;PSMD7;PSMD11;TRAF6;ZFAND2B;VPS52;PDCL;PRKG1
SUMOylation Of Chromatin Organization Proteins R-HSA-4551638	8/57	0.0562484	0.999865	2.05926029114718	5.92650567731062	RANBP2;PHC1;NUP188;RING1;NUP62;NUP54;CHD3;NUP37
Alzheimer's Disease	9/67	0.0562981	0.984226	1.95756783493499	5.63210723095775	BACE1;ENDOG;MME;CHRNA7;MAPK1;ECE1;TP53;RYR3;CDK5R1
PR Interval In Tripanosoma Cruzi Seropositivity	9/67	0.0562981	0.618659	1.95756783493499	5.63210723095775	NELL1;COL26A1;SV2C;PPIL2;PNO1;LINC01470;MAGI2;RUNDC3B;KALRN
PMC7299312-pgen.1008601.s017.xlsx-Normal DM DE association-Unnamed 3 DMPK	9/67	0.0562981	0.999995	1.95756783493499	5.63210723095775	PTPRR;GOLGA4;MBNL1;RBFOX1;PDE11A;MOG;FAM184A;NOX3;FNBP1L
PMC9528698-NIHMS1835045-supplement-Supp Table 23.xlsx-TTN control-Gene TTN	59/651	0.0568946	0.999995	1.26410245995642	3.62361989902206	DGKG;CCDC122;DOCK5;ANKRD33B;PIGZ;FHL5;BICD1;RESF1;PTPRG;DNAAF10;AUH;RASSF4;RPS6KA2;PHYHD1;MAN1A1;ZNF483;HEG1;SHROOM3;PTGR1;PARD3B;ELF1;KCNQ3;ELMO1;PPARG;RAPGEF5;PELI2;PPM1H;PPM1K;IQGAP2;FOXO3;KALRN;FOXO1;NPAS3;EFNB2;CLTCL1;TP53INP1;LRRC8A;SHOC1;ARGLU1;CRYGS;CARMIL1;GABBR1;ZFHX3;OSBPL6;DTNA;SLC10A7;IQSEC1;PLXDC2;SH3RF3;NFASC;NDUFAF6;CAPRIN2;YPEL1;KYAT1;PYROXD2;NAA16;CCDC3;LGR4;CCDC171
Signaling events mediated by HDAC class II	6/38	0.0574829	0.999939	2.36388036809816	6.75187578371264	RANBP2;NCOR2;TUBA1B;NUP62;RAN;HDAC7
Signaling of hepatocyte growth factor receptor	6/38	0.0574829	0.999939	2.36388036809816	6.75187578371264	MAP4K1;HGF;ITGA1;PTEN;MAPK1;DOCK1
PMC5555610 F2	6/38	0.0574829	0.772861	2.36388036809816	6.75187578371264	SYNGAP1;RRAS;MAPK1;RGL3;RASAL3;RGL2
Association Of TriC/CCT With Target Proteins During Biosynthesis R-HSA-390471	6/38	0.0574829	0.999865	2.36388036809816	6.75187578371264	NOP56;CCNE2;FBXO6;TP53;CCT5;WRAP53
Interactions Of Vpr With Host Cellular Proteins R-HSA-176033	6/38	0.0574829	0.999865	2.36388036809816	6.75187578371264	RANBP2;NUP188;NUP62;HMGA1;NUP54;NUP37
Proteins Involved in Glioma	29/290	0.05763	0.984226	1.40550938750385	4.01091931366019	LRRC4;PTEN;ILK;ADM;AHR;BCL2L12;GLIPR1;RRAS;SPP1;MAPK1;ECT2;EPHA5;ANGPT2;VDR;HGF;HMGA1;BMP7;SIRT2;BMP4;ELMO1;DCX;LNX1;PPARG;CSPG4;ANG;ATF5;TP53;DOCK1;ST6GALNAC5
Thyroid cancer	5/29	0.0582629	0.999939	2.62587988192552	7.46482489829329	RXRB;RXRA;MAPK1;PPARG;TP53
G27391WQ	5/29	0.0582629	0.97601	2.62587988192552	7.46482489829329	COL5A1;PRKCSH;AHSG;SPP1;CSPG4
Response To Antipsychotic Treatment	5/29	0.0582629	0.618659	2.62587988192552	7.46482489829329	KIRREL3;ATF7IP2;CTNNA2;SHISA9;ANKS1B
Psychosis In Alzheimer's Disease	5/29	0.0582629	0.618659	2.62587988192552	7.46482489829329	EGILA;CAMK1D;ARID4B;ANG;RBM34
PMC1327675 F3	5/29	0.0582629	0.772861	2.62587988192552	7.46482489829329	MME;GDNF;CYBA;A2M;SHBG
PMC1435944 F6	5/29	0.0582629	0.772861	2.62587988192552	7.46482489829329	MME;VDR;AGTRAP;CYBA;PPARG
PMC7247521 F6	5/29	0.0582629	0.772861	2.62587988192552	7.46482489829329	RXRB;DES;VDR;CKMT1A;RARB
PMC4364658 F6	5/29	0.0582629	0.772861	2.62587988192552	7.46482489829329	TIAM2;PLEKHG5;ARHGAP29;KALRN;FGD2
PMC6563994 F6	5/29	0.0582629	0.772861	2.62587988192552	7.46482489829329	PDHA1;BPGM;PCK1;RRP8;HK1
PMC9528698-NIHMS1835045-supplement-Supp Table 21 8.xlsx-TTN control-Gene TTN	53/579	0.0591128	0.999995	1.27731617843946	3.61264379156882	DOCK5;MTMR12;ITGB5;TENM4;ZBTB20;LDLRAD3;FNBP1L;PCSK6;BICD1;MEOX1;GLI3;RYR3;PTPRG;SLC22A15;LRRTM4;NDST4;RNF150;MALRD1;ANKS1B;ZNF365;MME;HEG1;ITGA1;SHROOM3;TBC1D9;ELF1;KCNQ3;RAPGEF5;DOCK1;DIPK1C;PLEKHH2;IQGAP2;FOXO3;MLLT3;KALRN;THSD4;NPAS3;DYNC2LI1;PDZD2;TESPA1;RIMKLB;CARMIL1;ZFHX3;OSBPL6;PLXDC2;MYO9A;MYO1D;SH3RF3;BMP4;RGCC;YPEL1;PI16;CCDC171
Common Executive Function	10/78	0.0596761	0.618659	1.85547424711511	5.23025545942269	SLC24A2;RBFOX1;SYNGAP1;THSD7B;LINC02607;LINC01414;SMYD4;ANKS1B;TMTC4;NPAS3
Focal adhesion	24/233	0.0600282	0.999939	1.45169247228744	4.0835262289088	CAV3;ITGB5;LAMC3;HGF;COL11A2;ITGA1;PTEN;ILK;ACTN4;PARVB;THBS2;THBS1;ARHGAP35;FGR;COL2A1;COL5A1;SPP1;MYL10;PAK6;MAPK1;FYN;PAK3;DOCK1;ITGA9
PMC4736761 F4	7/48	0.0603697	0.772861	2.15289654942934	6.04375614926177	BCAR3;KLF6;SET;MME;TRAF6;CSPG4;ZFPM1
PMC5911724 F5	7/48	0.0603697	0.772861	2.15289654942934	6.04375614926177	RXRA;CDC37;PTEN;MAPK1;FOXO3;PCK1;TP53
Response To Lipid (GO:0033993)	13/110	0.0608152	0.965698	1.69178082191781	4.73684199835623	CDKN2D;CITED1;FOXO3;OVCA2;FOXO1;TIRAP;RXRB;RXRA;SPP1;ALPL;IL12A;PPARG;ABCG1
PMC7092503 F7	9/68	0.060842	0.772861	1.92428452347874	5.386986863468	SLC25A3;ILF3;ACOT7;PDHA1;KARS1;ECH1;IDH3B;ETFB;TP53
Educational Attainment (MTAG)	67/753	0.0610742	0.618659	1.23932314238437	3.46473329451487	GABRB3;BCAR3;TENM2;TENM4;LINC01470;MCM9;TMEM200C;PRKAG2;ZBTB22;DISC1FP1;BICD1;GLI3;DOCK10;SH3PXD2A;RPS6KA2;SPEG;SCHLAP1;PRKG1;ANKS1B;GTF2I;MAGI1;EPHA5;RBFOX1;CAMK1D;LINC02790;SORCS3;SND1;PCCA;ADGRB3;ZNF516;RARB;RAB38;PRR12;LINC01378;CNTNAP4;WDR27;NECAB1;NTM;COL11A2;FOXO3;KALRN;NPAS3;TMTC4;DDN;PDE11A;FUT9;LINC01525;CTNNA2;TRPM3;WWOX;SLC37A1;PTPRN2;RNLS;BDNF;LRRN2;CADPS;ADAT1;PLXDC2;SGCZ;SMU1;LRFN2…
Glycosaminoglycan Biosynthetic Process (GO:0006024)	8/58	0.0612291	0.965698	2.01796587030717	5.63644639778063	SLC10A7;CHPF;CHSY1;CHST1;ST3GAL6;CHST5;B4GALT4;HS3ST2
Regulation Of Bone Mineralization (GO:0030500)	8/58	0.0612291	0.965698	2.01796587030717	5.63644639778063	RXRB;BMP4;NELL1;PKDCC;RXRA;AHSG;BMPR1B;BMP7
PMC10350897-j biol-2022-0528-S1.pdf-125-POMK POMK	8/58	0.0612291	0.999995	2.01796587030717	5.63644639778063	PPIL1;PPIL2;PPIP5K1;PPA1;PPARG;PPFIA4;PPM1F;PPFIA2
PMC10350897-j biol-2022-0528-S1.pdf-128-PRKCZ PRKCZ	8/58	0.0612291	0.999995	2.01796587030717	5.63644639778063	PRMT6;PRMT1;PRR3;PRRG2;PRKG2;PRKD2;PRR5L;PRODH
PMC9528698-NIHMS1835045-supplement-Supp Table 28 12.xlsx-TTN control-Gene TTN	8/58	0.0612291	0.999995	2.01796587030717	5.63644639778063	CARMIL1;ELF1;RAPGEF5;FOXO3;PLXDC2;KALRN;FOXO1;RESF1
PMC9528698-NIHMS1835045-supplement-Supp Table 34 12.xlsx-TTN control-Gene TTN	34/351	0.0616375	0.999995	1.35727799054285	3.78203436836706	NRP2;THSD7B;PRAG1;ITGB5;LAMC3;PPM1H;PRDM11;FOXO3;PKD2;KALRN;BICD1;PDZD2;SV2B;RPS6KA2;EPB41L3;RNF150;LMCD1;CD300LG;DTNA;LRRN2;SHROOM3;UNC5C;PLXDC2;ELL2;CORO2B;SH3RF3;BMP4;RGCC;ELMO1;LNX1;RGL3;PPARG;MRAP2;RAPGEF3
Aspartate Aminotransferase Levels	42/447	0.0618496	0.618659	1.31329036933509	3.65495199820378	PTPRR;RABGAP1;STEAP1B;DNAH2;HPSE2;PRAG1;ABCB4;WBP4;KEAP1;CROT;IQGAP2;SRP14;ARHGAP35;SMG6;SDCBP;CNNM1;SAMM50;ZC3H18;WASHC3;BRD3;CARMIL1;MBNL1;OSBPL6;FKRP;GOT1;BDNF;TNFSF12;ARHGAP29;SHROOM3;HLA-A;PARVB;SND1;ELF1;GPAM;PDE3A;PNPLA3;PRKD2;PPARG;TMCC2;HRG;TP53;NUP37
ERAD Pathway (GO:0036503)	11/89	0.0620072	0.965698	1.77960468623943	4.94820008083189	DNAJB2;SELENOS;FBXO2;TMEM67;UFD1;FBXO6;MAN1A1;FBXO44;ANKZF1;MARCHF6;ECPAS
Glucose Metabolism R-HSA-70326	11/89	0.0620072	0.999865	1.77960468623943	4.94820008083189	SLC25A1;RANBP2;SLC37A1;NUP188;NUP62;NUP54;BPGM;PCK1;ENO3;SLC25A11;NUP37
HIV infection	21/200	0.0636348	0.999939	1.48247841543931	4.08362659961985	RANBP2;PSMD11;XRCC4;NUP188;NCBP2;TAF10;HMGA1;AP2A1;HLA-A;PSMB6;PSMD7;POLR2A;NUP62;AP2S1;ELMO1;NUP54;FYN;RAE1;AP1M2;RAN;NUP37
Negative Regulation Of Cell-Substrate Adhesion (GO:0010812)	6/39	0.0638884	0.965698	2.2921236908967	6.30475461407506	FBLN1;ACTN4;MELTF;WNT1;THBS1;CORO2B
Pentosyltransferase Activity (GO:0016763)	6/39	0.0638884	0.982896	2.2921236908967	6.30475461407506	QTRT1;LACC1;PARP3;UMPS;ART3;SIRT2
Phospholipids To Total Lipids Ratio In Small HDL	6/39	0.0638884	0.618659	2.2921236908967	6.30475461407506	DOCK6;SCARB1;GPAM;ANGPTL8;PCSK6;LDLR
PMC7510089 F4	6/39	0.0638884	0.772861	2.2921236908967	6.30475461407506	POLR2A;BDNF;ALPL;PPARG;FOXO3;FOXO1
PMC4392212-gutjnl-2013-306620-s9.pdf-10-PRKAA1 PRKAA1	6/39	0.0638884	0.999995	2.2921236908967	6.30475461407506	ABCB4;CADPS;LOXL4;FYN;INTS8;CTCFL
Cercopithecine alphaherpesvirus 2 helicase-primase helicase subunit (gene: UL5)	6/39	0.0638884	0.998493	2.2921236908967	6.30475461407506	ABCB4;UBD;AP2A1;ARRB2;RAD23B;TP53
Regulation Of Cyclin-Dependent Protein Serine/Threonine Kinase Activity (GO:0000079)	10/79	0.064029	0.965698	1.82848425411354	5.02544091910794	CDKN2D;RGCC;CCNE2;CDC37;INCA1;PTEN;PKD2;CNPPD1;CCNJL;CDK5R1
Hypoxia and p53 in the Cardiovascular system Homo sapiens h p53hypoxiaPathway	4/21	0.0641228	0.948896	2.96480198614504	8.14417974031297	RPA1;TP53;HIC1;NFKBIB
FKBP14	4/21	0.0641228	0.954599	2.96480198614504	8.14417974031297	PRSS50;DHH;FUT9;A2M
Negative Regulation Of Double-Strand Break Repair Via Homologous Recombination (GO:2000042)	4/21	0.0641228	0.965698	2.96480198614504	8.14417974031297	MAD2L2;PARPBP;TP53BP1;SENP3
Telomerase RNA Binding (GO:0070034)	4/21	0.0641228	0.982896	2.96480198614504	8.14417974031297	PTEN;SMG6;SNRPB;WRAP53
Ephrin Receptor Binding (GO:0046875)	4/21	0.0641228	0.982896	2.96480198614504	8.14417974031297	EFNB2;EFNB3;FYN;ANKS1B
Non-glioblastoma Glioma	4/21	0.0641228	0.618659	2.96480198614504	8.14417974031297	HPSE2;POLR2A;MDM4;TP53
Plasma Parathyroid Hormone Levels	4/21	0.0641228	0.618659	2.96480198614504	8.14417974031297	CLIP2;B3GALT4;IFFO2;WDR46
Tenofovir Clearance In HIV Infection	4/21	0.0641228	0.618659	2.96480198614504	8.14417974031297	PRKAG2;KCNK16;UNC5C;LINC01036
PMC2640456 F1a	4/21	0.0641228	0.772861	2.96480198614504	8.14417974031297	PDIA3;DNAJA1;EIF4A1;MAPK1
PMC4052347 F5	4/21	0.0641228	0.772861	2.96480198614504	8.14417974031297	PPARG;HDAC8;HDAC7;NFKBIB
PMC4450051 F4	4/21	0.0641228	0.772861	2.96480198614504	8.14417974031297	IRF3;CD80;TRAF6;TIRAP
PMC4530307 F1	4/21	0.0641228	0.772861	2.96480198614504	8.14417974031297	PTTG1;THBS1;TP53;HTATIP2
PMC5996766 F1	4/21	0.0641228	0.772861	2.96480198614504	8.14417974031297	VDR;TRAF6;RARB;AHR
PMC6035094 F3	4/21	0.0641228	0.772861	2.96480198614504	8.14417974031297	IRF3;TRAF6;MAPK1;TIRAP
Negative Regulation Of NMDA Receptor-Mediated Neuronal Transmission R-HSA-9617324	4/21	0.0641228	0.999865	2.96480198614504	8.14417974031297	MPP2;DLG1;NEFL;PPM1F
COVID-19 (Covid Vs Negative)	16/144	0.0647453	0.618659	1.5785003431709	4.3208201874371	KIRREL3;NTNG1;LINC01376;CHRNA7;MAGI2;PPM1H;ANK2;SH3PXD2A;SCFD2;KCNQ3;SSPN;POC1A;DMD;LINC00378;PRKG1;RAG1
PMC9528698-NIHMS1835045-supplement-Supp Table 35 11.xlsx-TTN control-Gene TTN	15/133	0.0649696	0.999995	1.60502545860361	4.38787573986372	DTNA;PRAG1;ADM;PARVB;FNBP1L;PLXDC2;KALRN;CORO2B;PDZD2;RGCC;SV2B;RPS6KA2;CDC42EP4;LNX1;LMCD1
C5orf34	3/13	0.065359	0.954599	3.77897959183673	10.3085254100501	DOCK5;IRF3;IQCF1
ARRB1	3/13	0.065359	0.954599	3.77897959183673	10.3085254100501	ALDH4A1;LYRM7;ARRB2
RAI14	3/13	0.065359	0.954599	3.77897959183673	10.3085254100501	NECAB1;CAV3;VAPB
NDUFAB1	3/13	0.065359	0.954599	3.77897959183673	10.3085254100501	LYRM4;LYRM7;ETFB
SRRM1	3/13	0.065359	0.954599	3.77897959183673	10.3085254100501	ZC3H18;ZNF22;RBM34
BICD2	3/13	0.065359	0.954599	3.77897959183673	10.3085254100501	CPNE5;CAPN6;NEFL
Cellular Modified Amino Acid Catabolic Process (GO:0042219)	3/13	0.065359	0.965698	3.77897959183673	10.3085254100501	ALDH4A1;GGACT;PRODH
Cytoplasmic Sequestering Of Transcription Factor (GO:0042994)	3/13	0.065359	0.965698	3.77897959183673	10.3085254100501	KEAP1;PKD2;NFKBIB
Outer Mitochondrial Membrane Organization (GO:0007008)	3/13	0.065359	0.965698	3.77897959183673	10.3085254100501	MTCH1;SAMM50;TOMM20
Plasma Membrane Tubulation (GO:0097320)	3/13	0.065359	0.965698	3.77897959183673	10.3085254100501	SNX9;SNX33;FNBP1L
Positive Regulation Of Histone Deacetylation (GO:0031065)	3/13	0.065359	0.965698	3.77897959183673	10.3085254100501	C6ORF89;PRKD2;RRP8
Protein Insertion Into Mitochondrial Outer Membrane (GO:0045040)	3/13	0.065359	0.965698	3.77897959183673	10.3085254100501	MTCH1;SAMM50;TOMM20
Regulation Of Cellular Ketone Metabolic Process (GO:0010565)	3/13	0.065359	0.965698	3.77897959183673	10.3085254100501	NCOR2;PRKAG2;CYP7A1
Regulation Of Nitrogen Compound Metabolic Process (GO:0051171)	3/13	0.065359	0.965698	3.77897959183673	10.3085254100501	SELENOS;LDLR;CNDP1
Ubiquitin-Ubiquitin Ligase Activity (GO:0034450)	3/13	0.065359	0.982896	3.77897959183673	10.3085254100501	PPIL2;TRAF6;PELI2
Heparan Sulfate Sulfotransferase Activity (GO:0034483)	3/13	0.065359	0.982896	3.77897959183673	10.3085254100501	NDST4;HS3ST4;HS3ST2
Percent Liver Fat	3/13	0.065359	0.618659	3.77897959183673	10.3085254100501	GPAM;LINC01007;PNPLA3
Primary Tooth Development (Time To First Tooth Eruption)	3/13	0.065359	0.618659	3.77897959183673	10.3085254100501	BMP4;VSIG10L2;CDON
Response To Serotonin Reuptake Inhibitors In Major Depressive Disorder	3/13	0.065359	0.618659	3.77897959183673	10.3085254100501	MTMR12;DGCR5;TRPM3
Conotruncal Heart Defects (Maternal Effects)	3/13	0.065359	0.618659	3.77897959183673	10.3085254100501	AHR;IQCJ;ZNF343
Borderline Personality Disorder	3/13	0.065359	0.618659	3.77897959183673	10.3085254100501	CAMK1D;SNX9;TRDN
Bisoprolol Clearance In non-ST Elevation Acute Coronary Syndrome	3/13	0.065359	0.618659	3.77897959183673	10.3085254100501	CFDP1;CCDC34;LDLRAD3
Vaginal Microbiome MetaCyc Pathway (FUCCAT-PWY|fucose Degradation)	3/13	0.065359	0.618659	3.77897959183673	10.3085254100501	VANGL1;MINK1;PRKG1
F-savoury Food Liking (Derived Food-Liking Factor)	3/13	0.065359	0.618659	3.77897959183673	10.3085254100501	LRRTM4;RARB;CCDC171
PMC1236700 F2	3/13	0.065359	0.772861	3.77897959183673	10.3085254100501	DAXX;CDC37;BMF
PMC1375233 F2	3/13	0.065359	0.772861	3.77897959183673	10.3085254100501	IRF3;TRAF6;TIRAP
PMC1508148 F1	3/13	0.065359	0.772861	3.77897959183673	10.3085254100501	RXRA;VDR;SPP1
PMC2234434 F3	3/13	0.065359	0.772861	3.77897959183673	10.3085254100501	CAST;PTEN;SAT2
PMC2573957 F1	3/13	0.065359	0.772861	3.77897959183673	10.3085254100501	IRF3;TRAF6;TIRAP
PMC2633625 F2	3/13	0.065359	0.772861	3.77897959183673	10.3085254100501	IRF3;TRAF6;TIRAP
PMC2670612 F2	3/13	0.065359	0.772861	3.77897959183673	10.3085254100501	ABCC1;PTEN;ABCG2
PMC2716750 F1	3/13	0.065359	0.772861	3.77897959183673	10.3085254100501	BMP4;GDNF;SLIT2
PMC2917144 F1	3/13	0.065359	0.772861	3.77897959183673	10.3085254100501	IRF3;TRAF6;TIRAP
PMC2963142 F1	3/13	0.065359	0.772861	3.77897959183673	10.3085254100501	IRF3;TRAF6;TIRAP
PMC8105803 F6	3/13	0.065359	0.772861	3.77897959183673	10.3085254100501	AIFM2;PERP;PTEN
PMC2974170 F1	3/13	0.065359	0.772861	3.77897959183673	10.3085254100501	IRF3;TRAF6;TIRAP
PMC7210546 F1	3/13	0.065359	0.772861	3.77897959183673	10.3085254100501	IRF3;TRAF6;TIRAP
PMC7829348 F2	3/13	0.065359	0.772861	3.77897959183673	10.3085254100501	IRF3;TRAF6;TIRAP
PMC7938465 F5	3/13	0.065359	0.772861	3.77897959183673	10.3085254100501	AIFM2;PERP;PTEN
PMC3390257 F2	3/13	0.065359	0.772861	3.77897959183673	10.3085254100501	PTEN;FOXO3;FOXO1
PMC7450969 F4	3/13	0.065359	0.772861	3.77897959183673	10.3085254100501	SDCBP;PTEN;ABL1
PMC3594740 F1	3/13	0.065359	0.772861	3.77897959183673	10.3085254100501	IRF3;TRAF6;TIRAP
PMC7672575 F5	3/13	0.065359	0.772861	3.77897959183673	10.3085254100501	IRF3;TRAF6;TIRAP
PMC3774987 F3	3/13	0.065359	0.772861	3.77897959183673	10.3085254100501	IRF3;TRAF6;TIRAP
PMC3785471 F2	3/13	0.065359	0.772861	3.77897959183673	10.3085254100501	RANBP2;DAXX;UBE2E3
PMC7760708 F6	3/13	0.065359	0.772861	3.77897959183673	10.3085254100501	PTEN;ILK;FYN
PMC3887856 F1	3/13	0.065359	0.772861	3.77897959183673	10.3085254100501	PTEN;SH3BP4;SLC1A5
PMC4002811 F2	3/13	0.065359	0.772861	3.77897959183673	10.3085254100501	IRF3;TRAF6;PELI2
PMC4019000 F1	3/13	0.065359	0.772861	3.77897959183673	10.3085254100501	RXRA;BDNF;PTEN
PMC4387772 F1	3/13	0.065359	0.772861	3.77897959183673	10.3085254100501	PTEN;FOXO3;FOXO1
PMC4402595 F2	3/13	0.065359	0.772861	3.77897959183673	10.3085254100501	PTEN;MDM4;TP53
PMC4533772 F3	3/13	0.065359	0.772861	3.77897959183673	10.3085254100501	RYR1;AGTRAP;TP53
PMC4586477 F5	3/13	0.065359	0.772861	3.77897959183673	10.3085254100501	CDC37;PTEN;ILK
PMC4655423 F1	3/13	0.065359	0.772861	3.77897959183673	10.3085254100501	NFIL3;AHR;TOX
PMC4661210 F3	3/13	0.065359	0.772861	3.77897959183673	10.3085254100501	KEAP1;GCLM;ABCG2
PMC4709508 F3	3/13	0.065359	0.772861	3.77897959183673	10.3085254100501	IRF3;TRAF6;TIRAP
PMC4935960 F6	3/13	0.065359	0.772861	3.77897959183673	10.3085254100501	RING1;UBE2Q2;PTEN
PMC5382464 F2	3/13	0.065359	0.772861	3.77897959183673	10.3085254100501	RXRA;CDC37;PTEN
PMC5571607 F2	3/13	0.065359	0.772861	3.77897959183673	10.3085254100501	IRF3;TRAF6;TIRAP
PMC5702629 F5	3/13	0.065359	0.772861	3.77897959183673	10.3085254100501	IRF3;TRAF6;TIRAP
PMC5794649 F2	3/13	0.065359	0.772861	3.77897959183673	10.3085254100501	PTEN;PAK3;SIRT2
PMC5951297 F4	3/13	0.065359	0.772861	3.77897959183673	10.3085254100501	ABL1;MAPK1;TP53
PMC6085908 F1	3/13	0.065359	0.772861	3.77897959183673	10.3085254100501	SYNGAP1;BDNF;PTEN
PMC6521881 F2	3/13	0.065359	0.772861	3.77897959183673	10.3085254100501	BDNF;MAPK1;TP53
ERKs Are Inactivated R-HSA-202670	3/13	0.065359	0.999865	3.77897959183673	10.3085254100501	DUSP3;MAPK1;DUSP7
Nitric Oxide Metabolism In Cystic Fibrosis WP4947	3/13	0.065359	0.995023	3.77897959183673	10.3085254100501	PRMT6;PRMT1;PRMT3
Leukotriene Metabolic Pathway WP5171	3/13	0.065359	0.995023	3.77897959183673	10.3085254100501	ABCC1;LTA4H;PTGR1
Positive Regulation Of Phosphate Metabolic Process (GO:0045937)	5/30	0.0658554	0.965698	2.52070844686649	6.85706771725549	SDCBP;NELL1;ILK;ANG;THBS1
Breast Size	5/30	0.0658554	0.618659	2.52070844686649	6.85706771725549	OSBPL6;CADPS;ELMO1;CDON;ZNF365
Endometriosis Or Migraine	5/30	0.0658554	0.618659	2.52070844686649	6.85706771725549	CAMK1D;POLR2A;LINC01828;FHL5;SBF2
Netrin-mediated signaling events Homo sapiens 716a3d34-6194-11e5-8ac5-06603eb7f303	5/30	0.0658554	0.991991	2.52070844686649	6.85706771725549	ELMO1;MAPK1;FYN;UNC5C;DOCK1
PMC6428271 F5	5/30	0.0658554	0.772861	2.52070844686649	6.85706771725549	DAXX;CDC37;GAS2;ILK;SPTAN1
MAPK Targets/ Nuclear Events Mediated By MAP Kinases R-HSA-450282	5/30	0.0658554	0.999865	2.52070844686649	6.85706771725549	DUSP3;GDNF;RPS6KA2;MAPK1;DUSP7
PMC7299312-pgen.1008601.s017.xlsx-Endo I DM DE association-Unnamed 10 DMPK	5/30	0.0658554	0.999995	2.52070844686649	6.85706771725549	OSBPL6;FIP1L1;DLGAP1;ANK2;LGR4
PMC6662592-fgene-10-00623.nxml--HER2 Enriched ERBB2	5/30	0.0658554	0.999995	2.52070844686649	6.85706771725549	BMP4;BMPR1B;THBS1;BMP7;TP53
PMC7871366 F3	7/49	0.0661616	0.772861	2.10152341973624	5.70701257284168	LACC1;SDF2L1;TRAF3IP2;KEAP1;AHR;IL6ST;RNF186
PMC6590191 F3	7/49	0.0661616	0.772861	2.10152341973624	5.70701257284168	TMEM132D;ADAM29;COL5A1;IQSEC1;RPS6KA2;ECE1;NXPH1
Netrin-1 Signaling R-HSA-373752	7/49	0.0661616	0.999865	2.10152341973624	5.70701257284168	UNC5C;FYN;SLIT3;SLIT2;RNASE1;DOCK1;DSCAML1
PMC4608219-12920 2015 141 MOESM2 ESM.xlsx-Supp10 IR Signalling-Insulin Receptor Signalling 5 INSR	7/49	0.0661616	0.999995	2.10152341973624	5.70701257284168	PPP1R11;RRAS;PRKAG1;PTEN;PRKAG2;MAPK1;FOXO3
High Myopia	11/90	0.0661657	0.618659	1.75698280489705	4.77124961291293	CAST;SH3RF3;BMP3;RBFOX1;PDE11A;NFASC;ZER1;OSBPL6;HPSE2;NECTIN3;ANKS1B
Phospholipid Transport (GO:0015914)	8/59	0.0664773	0.965698	1.97829083851971	5.36293739726255	SCARB2;SCARB1;ABCC1;ABCB4;ABCA4;ATP10B;LDLR;ABCG1
Markers Of Kidney Cell Lineage WP5236	8/59	0.0664773	0.995023	1.97829083851971	5.36293739726255	BMP4;EGLN3;DES;CITED1;GDNF;OSR1;RARB;BMP7
Multi-Drug Resistance Factors Homo sapiens h mrpPathway	2/6	0.0666316	0.948896	6.29605710401088	17.0533513537682	ABCC1;ABCB4
Methionine salvage pathway	2/6	0.0666316	0.999939	6.29605710401088	17.0533513537682	GOT1;ADI1
Multi-drug resistance factors	2/6	0.0666316	0.999939	6.29605710401088	17.0533513537682	ABCC1;ABCB4
RSK activation	2/6	0.0666316	0.999939	6.29605710401088	17.0533513537682	RPS6KA2;MAPK1
ASF1-interacting protein complex (human)	2/6	0.0666316	0.395381	6.29605710401088	17.0533513537682	HIRA;ASF1A
BLM complex II (human)	2/6	0.0666316	0.395381	6.29605710401088	17.0533513537682	RPA1;RPA2
Endogenous Peptide Antigen Presentation	2/6	0.0666316	0.984226	6.29605710401088	17.0533513537682	PDIA3;TAPBP
Bone Mineralization Impairement in Osteoporosis	2/6	0.0666316	0.984226	6.29605710401088	17.0533513537682	SPP1;ALPL
Oxidative Stress Protection via AHR-NFE2L2-NQO1 Signaling in Keratinocytes	2/6	0.0666316	0.984226	6.29605710401088	17.0533513537682	KEAP1;AHR
G71838YU	2/6	0.0666316	0.97601	6.29605710401088	17.0533513537682	SPP1;LDLR
Amino-Acid Betaine Metabolic Process (GO:0006577)	2/6	0.0666316	0.965698	6.29605710401088	17.0533513537682	CROT;CPT1C
Cellular Response To Hepatocyte Growth Factor Stimulus (GO:0035729)	2/6	0.0666316	0.965698	6.29605710401088	17.0533513537682	NELL1;HGF
Cellular Response To Histamine (GO:0071420)	2/6	0.0666316	0.965698	6.29605710401088	17.0533513537682	GABRB3;DHX8
Cleavage Furrow Formation (GO:0036089)	2/6	0.0666316	0.965698	6.29605710401088	17.0533513537682	SNX9;SNX33
Dense Core Granule Cytoskeletal Transport (GO:0099519)	2/6	0.0666316	0.965698	6.29605710401088	17.0533513537682	KIF1C;PPFIA2
Hepatocyte Growth Factor Receptor Signaling Pathway (GO:0048012)	2/6	0.0666316	0.965698	6.29605710401088	17.0533513537682	NELL1;HGF
Insulin Secretion Involved In Cellular Response To Glucose Stimulus (GO:0035773)	2/6	0.0666316	0.965698	6.29605710401088	17.0533513537682	PTPRN2;PTPRN
Metanephric Nephron Tubule Development (GO:0072234)	2/6	0.0666316	0.965698	6.29605710401088	17.0533513537682	WNT7B;PKD2
Negative Regulation Of Blood Vessel Endothelial Cell Proliferation Involved In Sprouting Angiogenesis (GO:1903588)	2/6	0.0666316	0.965698	6.29605710401088	17.0533513537682	IL12A;THBS1
Positive Regulation Of Protein Localization To Centrosome (GO:1904781)	2/6	0.0666316	0.965698	6.29605710401088	17.0533513537682	NUP62;BICD1
rDNA Heterochromatin Formation (GO:0000183)	2/6	0.0666316	0.965698	6.29605710401088	17.0533513537682	RRP8;SIRT2
Regulation Of Cardiac Muscle Hypertrophy In Response To Stress (GO:1903242)	2/6	0.0666316	0.965698	6.29605710401088	17.0533513537682	PPARG;FOXO1
Regulation Of Hemoglobin Biosynthetic Process (GO:0046984)	2/6	0.0666316	0.965698	6.29605710401088	17.0533513537682	PRMT1;KLF4
Regulation Of Skeletal Muscle Contraction (GO:0014819)	2/6	0.0666316	0.965698	6.29605710401088	17.0533513537682	CAV3;DMD
Regulation Of Striated Muscle Tissue Development (GO:0016202)	2/6	0.0666316	0.965698	6.29605710401088	17.0533513537682	SOX15;SIRT2
Response To Hepatocyte Growth Factor (GO:0035728)	2/6	0.0666316	0.965698	6.29605710401088	17.0533513537682	NELL1;HGF
Substrate-Dependent Cell Migration, Cell Extension (GO:0006930)	2/6	0.0666316	0.965698	6.29605710401088	17.0533513537682	NELL1;SDCBP
Calcium-Dependent Protein Serine/Threonine Phosphatase Activity (GO:0004723)	2/6	0.0666316	0.982896	6.29605710401088	17.0533513537682	PPP3R1;PPM1F
Mannosyl-Oligosaccharide 1,2-Alpha-Mannosidase Activity (GO:0004571)	2/6	0.0666316	0.982896	6.29605710401088	17.0533513537682	MAN1A2;MAN1A1
Mannosyl-Oligosaccharide Mannosidase Activity (GO:0015924)	2/6	0.0666316	0.982896	6.29605710401088	17.0533513537682	MAN1A2;MAN1A1
Morphogen Activity (GO:0016015)	2/6	0.0666316	0.982896	6.29605710401088	17.0533513537682	WNT1;NBL1
BMI At Adiposity Rebound X Sex Interaction	2/6	0.0666316	0.618659	6.29605710401088	17.0533513537682	EGLN3;LYRM4
OTU99 132 (Bacteroidales) Abundance	2/6	0.0666316	0.618659	6.29605710401088	17.0533513537682	LYVE1;IRAG1-AS1
Hexadecenedioate (C16:1-Dc) (X-11905) Levels	2/6	0.0666316	0.618659	6.29605710401088	17.0533513537682	SLCO1A2;IAPP
Response To Lamotrigine And Valproic Acid In Genetic Generalized Epilepsy	2/6	0.0666316	0.618659	6.29605710401088	17.0533513537682	LRRTM4;MAGI2
Nicotine Metabolite Ratio In Current Smokers	2/6	0.0666316	0.618659	6.29605710401088	17.0533513537682	CYP2A6;TMPRSS11E
2-Hydroxy-3-Methylvalerate Levels In Elite Athletes	2/6	0.0666316	0.618659	6.29605710401088	17.0533513537682	PTPRR;RASAL3
Accrued Duration Of Remission In Mepolizumab-Treated Eosinophilic Granulomatosis With Polyangiitis	2/6	0.0666316	0.618659	6.29605710401088	17.0533513537682	CTNNA2;NFKBIB
1-arachidonoyl-GPC (20:4N6) Levels In Elite Athletes	2/6	0.0666316	0.618659	6.29605710401088	17.0533513537682	RYR1;RUNDC3B
Dietary Macronutrient Intake	2/6	0.0666316	0.618659	6.29605710401088	17.0533513537682	TENM2;RARB
Autism And Major Depressive Disorder (MTAG)	2/6	0.0666316	0.618659	6.29605710401088	17.0533513537682	RBFOX1;SORCS3
Evening Vs. Morning Chronotype (sMEQ Score)	2/6	0.0666316	0.618659	6.29605710401088	17.0533513537682	RBFOX1;PTPRG
Parkinson's Disease Progression (Motor)	2/6	0.0666316	0.618659	6.29605710401088	17.0533513537682	MCTP2;THSD4
Glomerular Filtration Rate In Diabetes	2/6	0.0666316	0.618659	6.29605710401088	17.0533513537682	THSD7B;PRKAG2
Cerebellum White Matter Volume Change Rate	2/6	0.0666316	0.618659	6.29605710401088	17.0533513537682	AIFM2;MACROH2A2
Pallidum Volume Change Rate X Age Interaction (1Df)	2/6	0.0666316	0.618659	6.29605710401088	17.0533513537682	TBC1D9;SORCS2
Vaginal Microbiome MetaCyc Pathway (PYRIDNUCSAL-PWY|NAD Salvage Pathway I)	2/6	0.0666316	0.618659	6.29605710401088	17.0533513537682	RARB;DYNLRB2-AS1
Beta-glucuronidase Levels	2/6	0.0666316	0.618659	6.29605710401088	17.0533513537682	CATSPER2;GNPTAB
Microtubule-associated Proteins 1A/1B Light Chain 3B Levels	2/6	0.0666316	0.618659	6.29605710401088	17.0533513537682	TERF2IP;CPHXL
Optic Nerve Measurement (Cup-To-Disc Ratio)	2/6	0.0666316	0.618659	6.29605710401088	17.0533513537682	UNC5C;RAPGEF3
Transverse Temporal Cortex Volume	2/6	0.0666316	0.618659	6.29605710401088	17.0533513537682	HGF;RAD18
Corpus Callosum Central Volume	2/6	0.0666316	0.618659	6.29605710401088	17.0533513537682	PDZD2;LINC02829
HDL Cholesterol And Triglyceride Levels	2/6	0.0666316	0.618659	6.29605710401088	17.0533513537682	LINC00906;TENM4
Radiation Response	2/6	0.0666316	0.618659	6.29605710401088	17.0533513537682	WWOX;NDUFAF6
C-reactive Protein And White Blood Cell Count	2/6	0.0666316	0.618659	6.29605710401088	17.0533513537682	KCNE4;RUNX1
Hip Shape (DXA Scan)	2/6	0.0666316	0.618659	6.29605710401088	17.0533513537682	WWOX;RUNX1
White Blood Cell Count (Lymphocyte)	2/6	0.0666316	0.618659	6.29605710401088	17.0533513537682	WDR27;UBE2L3
Serum Levels Of Protein CTSA	2/6	0.0666316	0.618659	6.29605710401088	17.0533513537682	PHC1;GNPTAB
ST2 Protein Levels	2/6	0.0666316	0.618659	6.29605710401088	17.0533513537682	KIRREL3;DCPS
Vegetable Consumption	2/6	0.0666316	0.618659	6.29605710401088	17.0533513537682	MAGI2;LINC01414
Disability Level (Impaired Activities Of Daily Living)	2/6	0.0666316	0.618659	6.29605710401088	17.0533513537682	RTN4RL1;NOL4
Parenchymal Hematoma In Thrombolytic-Treated Acute Ischaemic Stroke	2/6	0.0666316	0.618659	6.29605710401088	17.0533513537682	SEMA3A;DSCAML1
Response To Anti-Retroviral Therapy (ddI/d4T) In HIV-1 Infection (Grade 1 Peripheral Neuropathy)	2/6	0.0666316	0.618659	6.29605710401088	17.0533513537682	HPSE2;CALD1
Prevalent Atrial Fibrillation	2/6	0.0666316	0.618659	6.29605710401088	17.0533513537682	ZFHX3;NEURL1
Facial Morphology (Factor 10, Width Of Nasal Floor)	2/6	0.0666316	0.618659	6.29605710401088	17.0533513537682	PCCA;DSCAML1
Serum Levels Of Protein IGF1	2/6	0.0666316	0.618659	6.29605710401088	17.0533513537682	FOXO3;SORCS2
Radiation-Induced Toxicity (Physician-Rated Acute Dysphagia)	2/6	0.0666316	0.618659	6.29605710401088	17.0533513537682	KIRREL3;LEMD1
Peripheral Blood CD34+ Cell Levels	2/6	0.0666316	0.618659	6.29605710401088	17.0533513537682	PPM1H;ITGA9
Severe Insulin-Deficient Type 2 Diabetes	2/6	0.0666316	0.618659	6.29605710401088	17.0533513537682	SGCZ;SLC12A8
Age Related Hearing Loss-Related Regional Glucose Metabolism (Bilateral Heschl?s Gyrus)	2/6	0.0666316	0.618659	6.29605710401088	17.0533513537682	DPY19L4;NTM
Vaginal Microbiome MetaCyc Pathway (FASYN-INITIAL-PWY|superpathway Of Fatty Acid Biosynthesis Initiation (E. Coli))	2/6	0.0666316	0.618659	6.29605710401088	17.0533513537682	SH3PXD2A;RARB
Cake Icing Liking	2/6	0.0666316	0.618659	6.29605710401088	17.0533513537682	LINC01414;CCDC171
C-X-C Motif Chemokine 5 Levels	2/6	0.0666316	0.618659	6.29605710401088	17.0533513537682	BRD3;ZFPM1
Vascular Endothelial Growth Factor Receptor 3 Levels	2/6	0.0666316	0.618659	6.29605710401088	17.0533513537682	CPOX;ST3GAL6
NEDD4L	2/6	0.0666316	0.957565	6.29605710401088	17.0533513537682	WWOX;HECW2
FGL1	2/6	0.0666316	0.957565	6.29605710401088	17.0533513537682	LSG1;PRR12
AFF4	2/6	0.0666316	0.957565	6.29605710401088	17.0533513537682	ELL2;ELL3
Phenylalanine, tyrosine and tryptophan biosynthesis	2/6	0.0666316	0.999995	6.29605710401088	17.0533513537682	IL4I1;GOT1
PMC1174965 F4	2/6	0.0666316	0.772861	6.29605710401088	17.0533513537682	IRF3;TRAF6
PMC8006014 F2	2/6	0.0666316	0.772861	6.29605710401088	17.0533513537682	PTEN;FOXO1
PMC7969667 F10	2/6	0.0666316	0.772861	6.29605710401088	17.0533513537682	TRAF6;TIRAP
PMC151358 F5	2/6	0.0666316	0.772861	6.29605710401088	17.0533513537682	ENDOG;BMF
PMC7933466 F1	2/6	0.0666316	0.772861	6.29605710401088	17.0533513537682	IRF3;KEAP1
PMC1885811 F4	2/6	0.0666316	0.772861	6.29605710401088	17.0533513537682	TRAF6;TIRAP
PMC2077853 F9	2/6	0.0666316	0.772861	6.29605710401088	17.0533513537682	GDNF;FYN
PMC2424294 F2	2/6	0.0666316	0.772861	6.29605710401088	17.0533513537682	PTEN;EPOR
PMC7508399 F5	2/6	0.0666316	0.772861	6.29605710401088	17.0533513537682	RXRA;CD80
PMC2491722 F4	2/6	0.0666316	0.772861	6.29605710401088	17.0533513537682	GDNF;FYN
PMC2517296 F1	2/6	0.0666316	0.772861	6.29605710401088	17.0533513537682	TRAF6;PTEN
PMC7294267 F1	2/6	0.0666316	0.772861	6.29605710401088	17.0533513537682	ANGPT2;FOXO1
PMC7353046 F7	2/6	0.0666316	0.772861	6.29605710401088	17.0533513537682	DOCK6;ARHGAP31
PMC6901795 F7	2/6	0.0666316	0.772861	6.29605710401088	17.0533513537682	IRF3;TRAF6
PMC7404143 F3	2/6	0.0666316	0.772861	6.29605710401088	17.0533513537682	NRP2;RRAS
PMC2754156 F3	2/6	0.0666316	0.772861	6.29605710401088	17.0533513537682	TRAF6;TIRAP
PMC2766659 F4	2/6	0.0666316	0.772861	6.29605710401088	17.0533513537682	BMP4;GDNF
PMC7486775 F1	2/6	0.0666316	0.772861	6.29605710401088	17.0533513537682	PDHA2;PDHA1
PMC6896717 F8	2/6	0.0666316	0.772861	6.29605710401088	17.0533513537682	MAGI2;PTEN
PMC7193283 F3	2/6	0.0666316	0.772861	6.29605710401088	17.0533513537682	ABCG5;CYP7A1
PMC2808058 F1	2/6	0.0666316	0.772861	6.29605710401088	17.0533513537682	HES2;BMP7
PMC2808458 F1	2/6	0.0666316	0.772861	6.29605710401088	17.0533513537682	IRF3;TRAF6
PMC2811067 F2	2/6	0.0666316	0.772861	6.29605710401088	17.0533513537682	KEAP1;AHR
PMC2821718 F3	2/6	0.0666316	0.772861	6.29605710401088	17.0533513537682	IRF3;TRAF6
PMC2832309 F2	2/6	0.0666316	0.772861	6.29605710401088	17.0533513537682	WWOX;HGF
PMC2835842 F1	2/6	0.0666316	0.772861	6.29605710401088	17.0533513537682	IRF3;TRAF6
PMC2856448 F1	2/6	0.0666316	0.772861	6.29605710401088	17.0533513537682	PRMT1;PTEN
PMC2904914 F1	2/6	0.0666316	0.772861	6.29605710401088	17.0533513537682	GDNF;FYN
PMC8109088 F8	2/6	0.0666316	0.772861	6.29605710401088	17.0533513537682	FOXO1;CCR2
PMC7760556 F1	2/6	0.0666316	0.772861	6.29605710401088	17.0533513537682	DES;CD80
PMC8053626 F6	2/6	0.0666316	0.772861	6.29605710401088	17.0533513537682	ABCG5;RXRA
PMC2939392 F2	2/6	0.0666316	0.772861	6.29605710401088	17.0533513537682	IRF3;TIRAP
PMC7840460 F7	2/6	0.0666316	0.772861	6.29605710401088	17.0533513537682	IRF3;TRAF6
PMC3017908 F6	2/6	0.0666316	0.772861	6.29605710401088	17.0533513537682	PTEN;ARRB2
PMC7823834 F2	2/6	0.0666316	0.772861	6.29605710401088	17.0533513537682	FOXO1;RUNX1
PMC3035032 F3	2/6	0.0666316	0.772861	6.29605710401088	17.0533513537682	PTEN;FYN
PMC3038181 F1	2/6	0.0666316	0.772861	6.29605710401088	17.0533513537682	TRAF6;PTEN
PMC3047086 F9	2/6	0.0666316	0.772861	6.29605710401088	17.0533513537682	VDR;KEAP1
PMC3118418 F1	2/6	0.0666316	0.772861	6.29605710401088	17.0533513537682	BMP4;BMP7
PMC8071448 F2	2/6	0.0666316	0.772861	6.29605710401088	17.0533513537682	PTEN;HMGA1
PMC7327986 F5	2/6	0.0666316	0.772861	6.29605710401088	17.0533513537682	PTEN;KEAP1
PMC3156870 F1	2/6	0.0666316	0.772861	6.29605710401088	17.0533513537682	PTEN;BMF
PMC7700034 F7	2/6	0.0666316	0.772861	6.29605710401088	17.0533513537682	BACE1;KEAP1
PMC8065646 F3	2/6	0.0666316	0.772861	6.29605710401088	17.0533513537682	KEAP1;FOXO1
PMC7102936 F5	2/6	0.0666316	0.772861	6.29605710401088	17.0533513537682	BDNF;PTEN
PMC7283470 F1	2/6	0.0666316	0.772861	6.29605710401088	17.0533513537682	IRF3;PTEN
PMC3236456 F3	2/6	0.0666316	0.772861	6.29605710401088	17.0533513537682	CHIT1;TRAF6
PMC7460532 F1	2/6	0.0666316	0.772861	6.29605710401088	17.0533513537682	PTEN;TP53
PMC3250173 F7	2/6	0.0666316	0.772861	6.29605710401088	17.0533513537682	IRF3;TIRAP
PMC3255271 F1	2/6	0.0666316	0.772861	6.29605710401088	17.0533513537682	SET;ABCG2
PMC3260150 F2	2/6	0.0666316	0.772861	6.29605710401088	17.0533513537682	DAXX;ST3GAL6
PMC3260552 F4	2/6	0.0666316	0.772861	6.29605710401088	17.0533513537682	PTEN;BMF
PMC3270883 F1	2/6	0.0666316	0.772861	6.29605710401088	17.0533513537682	SCARB1;LDLR
PMC3285038 F2	2/6	0.0666316	0.772861	6.29605710401088	17.0533513537682	HGF;PTEN
PMC7805053 F4	2/6	0.0666316	0.772861	6.29605710401088	17.0533513537682	IRF3;TRAF6
PMC3355838 F1	2/6	0.0666316	0.772861	6.29605710401088	17.0533513537682	PTEN;TP53
PMC3357504 F2	2/6	0.0666316	0.772861	6.29605710401088	17.0533513537682	SET;PTEN
PMC3366472 F2	2/6	0.0666316	0.772861	6.29605710401088	17.0533513537682	IRF3;TIRAP
PMC6994339 F1	2/6	0.0666316	0.772861	6.29605710401088	17.0533513537682	KEAP1;GCLM
PMC3382253 F3	2/6	0.0666316	0.772861	6.29605710401088	17.0533513537682	ENDOG;APAF1
PMC7060917 F5	2/6	0.0666316	0.772861	6.29605710401088	17.0533513537682	PPARG;LTA4H
PMC3407412 F5	2/6	0.0666316	0.772861	6.29605710401088	17.0533513537682	PTEN;ILK
PMC3427885 F4	2/6	0.0666316	0.772861	6.29605710401088	17.0533513537682	PTEN;EPOR
PMC3429771 F5	2/6	0.0666316	0.772861	6.29605710401088	17.0533513537682	BMP4;BMP7
PMC3437536 F1	2/6	0.0666316	0.772861	6.29605710401088	17.0533513537682	PTEN;FOXO1
PMC7415235 F2	2/6	0.0666316	0.772861	6.29605710401088	17.0533513537682	TRAF6;ABCG1
PMC7561614 F1	2/6	0.0666316	0.772861	6.29605710401088	17.0533513537682	PDCL;MVD
PMC7794007 F1	2/6	0.0666316	0.772861	6.29605710401088	17.0533513537682	KEAP1;RNF186
PMC6554373 GA	2/6	0.0666316	0.772861	6.29605710401088	17.0533513537682	BDNF;EPOR
PMC7554583 F2	2/6	0.0666316	0.772861	6.29605710401088	17.0533513537682	VAPB;ATF5
PMC3606533 F1	2/6	0.0666316	0.772861	6.29605710401088	17.0533513537682	ABCB4;PNPLA3
PMC7595665 F3	2/6	0.0666316	0.772861	6.29605710401088	17.0533513537682	HGF;SIRT2
PMC7150862 F8	2/6	0.0666316	0.772861	6.29605710401088	17.0533513537682	IRF3;TRAF6
PMC7399146 F4	2/6	0.0666316	0.772861	6.29605710401088	17.0533513537682	APAF1;BDNF
PMC7272522 F2	2/6	0.0666316	0.772861	6.29605710401088	17.0533513537682	KEAP1;AHR
PMC3673040 F1	2/6	0.0666316	0.772861	6.29605710401088	17.0533513537682	PCSK1;BDNF
PMC3693006 F4	2/6	0.0666316	0.772861	6.29605710401088	17.0533513537682	TRAF6;TIRAP
PMC3717800 F7	2/6	0.0666316	0.772861	6.29605710401088	17.0533513537682	PTEN;ILK
PMC3721836 F9	2/6	0.0666316	0.772861	6.29605710401088	17.0533513537682	BDNF;DCX
PMC3784162 F2	2/6	0.0666316	0.772861	6.29605710401088	17.0533513537682	IRF3;TRAF6
PMC3814639 F2	2/6	0.0666316	0.772861	6.29605710401088	17.0533513537682	KEAP1;GCLM
PMC6964830 F8	2/6	0.0666316	0.772861	6.29605710401088	17.0533513537682	WWC1;NPHP4
PMC7016950 F8	2/6	0.0666316	0.772861	6.29605710401088	17.0533513537682	BACE1;ADIPOR1
PMC3829196 F2	2/6	0.0666316	0.772861	6.29605710401088	17.0533513537682	APAF1;PERP
PMC3836169 F1	2/6	0.0666316	0.772861	6.29605710401088	17.0533513537682	FOXO3;FOXO1
PMC6942871 F6	2/6	0.0666316	0.772861	6.29605710401088	17.0533513537682	PTEN;BMF
PMC3864081 F1	2/6	0.0666316	0.772861	6.29605710401088	17.0533513537682	IRF3;TIRAP
PMC3887856 F3	2/6	0.0666316	0.772861	6.29605710401088	17.0533513537682	PTEN;SH3BP4
PMC3896749 F9	2/6	0.0666316	0.772861	6.29605710401088	17.0533513537682	IRF3;TIRAP
PMC3929669 F4	2/6	0.0666316	0.772861	6.29605710401088	17.0533513537682	TRAF6;PPARG
PMC3936782 F2	2/6	0.0666316	0.772861	6.29605710401088	17.0533513537682	APAF1;BDNF
PMC3952558 F2	2/6	0.0666316	0.772861	6.29605710401088	17.0533513537682	IRF3;TIRAP
PMC3961361 F8	2/6	0.0666316	0.772861	6.29605710401088	17.0533513537682	IRF3;TRAF6
PMC3961481 F1	2/6	0.0666316	0.772861	6.29605710401088	17.0533513537682	TPP1;HS3ST4
PMC4013580 F6	2/6	0.0666316	0.772861	6.29605710401088	17.0533513537682	BMP4;ABCG1
PMC4040287 F4	2/6	0.0666316	0.772861	6.29605710401088	17.0533513537682	BDNF;RARB
PMC4064060 F4	2/6	0.0666316	0.772861	6.29605710401088	17.0533513537682	PTEN;PPARG
PMC4083752 F1	2/6	0.0666316	0.772861	6.29605710401088	17.0533513537682	FOXO3;FOXO1
PMC4115279 F1	2/6	0.0666316	0.772861	6.29605710401088	17.0533513537682	ENDOG;APAF1
PMC4127075 F1	2/6	0.0666316	0.772861	6.29605710401088	17.0533513537682	KRT4;KLF4
PMC4134348 F1	2/6	0.0666316	0.772861	6.29605710401088	17.0533513537682	IRF3;TIRAP
PMC4190587 F3	2/6	0.0666316	0.772861	6.29605710401088	17.0533513537682	PIM1;KLF4
PMC4201175 F1	2/6	0.0666316	0.772861	6.29605710401088	17.0533513537682	PTEN;TP53
PMC4211543 F1	2/6	0.0666316	0.772861	6.29605710401088	17.0533513537682	BACE1;FYN
PMC4243516 F1	2/6	0.0666316	0.772861	6.29605710401088	17.0533513537682	MOG;TRAF6
PMC4277124 F12	2/6	0.0666316	0.772861	6.29605710401088	17.0533513537682	KEAP1;GCLM
PMC4280670 F1	2/6	0.0666316	0.772861	6.29605710401088	17.0533513537682	TRAF6;PTEN
PMC4389820 F1	2/6	0.0666316	0.772861	6.29605710401088	17.0533513537682	TRAF6;ILK
PMC4447120 F1	2/6	0.0666316	0.772861	6.29605710401088	17.0533513537682	KEAP1;TP53
PMC4451983 F2	2/6	0.0666316	0.772861	6.29605710401088	17.0533513537682	HNRNPL;WDR5
PMC4520659 F4	2/6	0.0666316	0.772861	6.29605710401088	17.0533513537682	RXRB;RARB
PMC4619526 F1	2/6	0.0666316	0.772861	6.29605710401088	17.0533513537682	RXRA;VDR
PMC4628649 F2	2/6	0.0666316	0.772861	6.29605710401088	17.0533513537682	NFIL3;TOX
PMC4645376 F6	2/6	0.0666316	0.772861	6.29605710401088	17.0533513537682	TRAF6;TIRAP
PMC4694980 F3	2/6	0.0666316	0.772861	6.29605710401088	17.0533513537682	HNRNPL;ACTN4
PMC4714567 F3	2/6	0.0666316	0.772861	6.29605710401088	17.0533513537682	KLF6;AHR
PMC4727329 F7	2/6	0.0666316	0.772861	6.29605710401088	17.0533513537682	PTEN;TP53
PMC4803542 F1	2/6	0.0666316	0.772861	6.29605710401088	17.0533513537682	BDNF;PTEN
PMC4836210 F4	2/6	0.0666316	0.772861	6.29605710401088	17.0533513537682	ENDOG;APAF1
PMC4903173 F1	2/6	0.0666316	0.772861	6.29605710401088	17.0533513537682	LDLR;MARCHF6
PMC4905711 F1	2/6	0.0666316	0.772861	6.29605710401088	17.0533513537682	KEAP1;GCLM
PMC4918817 F2	2/6	0.0666316	0.772861	6.29605710401088	17.0533513537682	PAX7;FOXO3
PMC4926232 F7	2/6	0.0666316	0.772861	6.29605710401088	17.0533513537682	BMP4;RUNX1
PMC4948278 F5	2/6	0.0666316	0.772861	6.29605710401088	17.0533513537682	PTEN;ILK
PMC4993636 F4	2/6	0.0666316	0.772861	6.29605710401088	17.0533513537682	ILK;AMOT
PMC5041887 F6	2/6	0.0666316	0.772861	6.29605710401088	17.0533513537682	VANGL1;PTEN
PMC5052620 F10	2/6	0.0666316	0.772861	6.29605710401088	17.0533513537682	THBS1;BMP7
PMC5054901 F2	2/6	0.0666316	0.772861	6.29605710401088	17.0533513537682	TRAF6;PTEN
PMC5063567 F2	2/6	0.0666316	0.772861	6.29605710401088	17.0533513537682	PTEN;AHR
PMC5101203 F1	2/6	0.0666316	0.772861	6.29605710401088	17.0533513537682	BACE1;BDNF
PMC5116860 F3	2/6	0.0666316	0.772861	6.29605710401088	17.0533513537682	PTEN;PKD2
PMC523267 F2	2/6	0.0666316	0.772861	6.29605710401088	17.0533513537682	PAK6;PAK3
PMC5253284 F2	2/6	0.0666316	0.772861	6.29605710401088	17.0533513537682	HGF;PTEN
PMC5286373 F3	2/6	0.0666316	0.772861	6.29605710401088	17.0533513537682	MTHFD1L;PSAT1
PMC5324334 F7	2/6	0.0666316	0.772861	6.29605710401088	17.0533513537682	CCNE2;TP53
PMC5326620 F1	2/6	0.0666316	0.772861	6.29605710401088	17.0533513537682	IRF3;TRAF6
PMC5368067 F1	2/6	0.0666316	0.772861	6.29605710401088	17.0533513537682	BCL9;TMEM88
PMC5378054 F4	2/6	0.0666316	0.772861	6.29605710401088	17.0533513537682	BMP4;BMP7
PMC5384128 F1	2/6	0.0666316	0.772861	6.29605710401088	17.0533513537682	PTEN;PKD2
PMC5463201 F2	2/6	0.0666316	0.772861	6.29605710401088	17.0533513537682	NOX3;NOX5
PMC5472345 F1	2/6	0.0666316	0.772861	6.29605710401088	17.0533513537682	NHLH2;FOXO1
PMC5486142 F2	2/6	0.0666316	0.772861	6.29605710401088	17.0533513537682	PTEN;ADIPOR1
PMC5555522 F3	2/6	0.0666316	0.772861	6.29605710401088	17.0533513537682	PTEN;TP53
PMC5558095 F7	2/6	0.0666316	0.772861	6.29605710401088	17.0533513537682	NRP2;ABCG2
PMC5570368 F8	2/6	0.0666316	0.772861	6.29605710401088	17.0533513537682	RXRA;PPARG
PMC5578700 F1	2/6	0.0666316	0.772861	6.29605710401088	17.0533513537682	MFGE8;EPOR
PMC5585627 F3	2/6	0.0666316	0.772861	6.29605710401088	17.0533513537682	ABCC1;ABCG2
PMC5587377 F2	2/6	0.0666316	0.772861	6.29605710401088	17.0533513537682	PTEN;ILK
PMC5595361 F4	2/6	0.0666316	0.772861	6.29605710401088	17.0533513537682	IRF3;TRAF6
PMC5661282 F9	2/6	0.0666316	0.772861	6.29605710401088	17.0533513537682	CITED1;BMP7
PMC5826318 F1	2/6	0.0666316	0.772861	6.29605710401088	17.0533513537682	PTEN;ABCG1
PMC5864191 F2	2/6	0.0666316	0.772861	6.29605710401088	17.0533513537682	DNAJA1;MVD
PMC5883109 F9	2/6	0.0666316	0.772861	6.29605710401088	17.0533513537682	TRAF6;TIRAP
PMC5893285 F3	2/6	0.0666316	0.772861	6.29605710401088	17.0533513537682	PTEN;FYN
PMC5893408 F1	2/6	0.0666316	0.772861	6.29605710401088	17.0533513537682	PTEN;S1PR5
PMC5932347 F1	2/6	0.0666316	0.772861	6.29605710401088	17.0533513537682	IRF3;TRAF6
PMC6003401 F6	2/6	0.0666316	0.772861	6.29605710401088	17.0533513537682	TRAF6;TIRAP
PMC6032252 F1	2/6	0.0666316	0.772861	6.29605710401088	17.0533513537682	HGF;CD80
PMC6032276 F6	2/6	0.0666316	0.772861	6.29605710401088	17.0533513537682	FLG;AHR
PMC6041267 F8	2/6	0.0666316	0.772861	6.29605710401088	17.0533513537682	ILK;PRKD2
PMC6071982 F4	2/6	0.0666316	0.772861	6.29605710401088	17.0533513537682	SCARB1;RXRA
PMC6076434 F8	2/6	0.0666316	0.772861	6.29605710401088	17.0533513537682	IRF3;TIRAP
PMC6124548 F6	2/6	0.0666316	0.772861	6.29605710401088	17.0533513537682	BMP4;BMP7
PMC6138823 F3	2/6	0.0666316	0.772861	6.29605710401088	17.0533513537682	LDLR;ABCG1
PMC6167501 F2	2/6	0.0666316	0.772861	6.29605710401088	17.0533513537682	PTEN;FOXO1
PMC6168472 F7	2/6	0.0666316	0.772861	6.29605710401088	17.0533513537682	KMT2D;KLF4
PMC6245347 F4	2/6	0.0666316	0.772861	6.29605710401088	17.0533513537682	PTEN;ABL1
PMC6245608 F3	2/6	0.0666316	0.772861	6.29605710401088	17.0533513537682	FOXO3;FOXO1
PMC6245940 F4	2/6	0.0666316	0.772861	6.29605710401088	17.0533513537682	SCARB1;ABCG1
PMC6262299 F2	2/6	0.0666316	0.772861	6.29605710401088	17.0533513537682	GDNF;BDNF
PMC6288292 F2	2/6	0.0666316	0.772861	6.29605710401088	17.0533513537682	GDNF;HGF
PMC6436804 F9	2/6	0.0666316	0.772861	6.29605710401088	17.0533513537682	SET;MAPK1
PMC6482252 F1	2/6	0.0666316	0.772861	6.29605710401088	17.0533513537682	LDLR;ABCG1
PMC6529740 F2	2/6	0.0666316	0.772861	6.29605710401088	17.0533513537682	CD68;RAN
PMC6770832 F6	2/6	0.0666316	0.772861	6.29605710401088	17.0533513537682	DAXX;FOXO3
PMC6770863 F1	2/6	0.0666316	0.772861	6.29605710401088	17.0533513537682	TRAF6;TIRAP
PMC6894473 F3	2/6	0.0666316	0.772861	6.29605710401088	17.0533513537682	TRAF6;PTEN
PPP4C	2/6	0.0666316	0.516395	6.29605710401088	17.0533513537682	MAP4K1;RPA2
Activated NTRK2 Signals Thru FYN R-HSA-9032500	2/6	0.0666316	0.999865	6.29605710401088	17.0533513537682	FYN;RNASE1
Phenylalanine Metabolism R-HSA-8964208	2/6	0.0666316	0.999865	6.29605710401088	17.0533513537682	IL4I1;KYAT1
RUNX1 Regulates Estrogen Receptor Mediated Transcription R-HSA-8931987	2/6	0.0666316	0.999865	6.29605710401088	17.0533513537682	GPAM;RUNX1
Synthesis Of Dolichyl-phosphate R-HSA-446199	2/6	0.0666316	0.999865	6.29605710401088	17.0533513537682	DOLK;MVD
Somatroph Axis GH And Its Relationship To Dietary Restriction And Aging WP4186	2/6	0.0666316	0.995023	6.29605710401088	17.0533513537682	PTEN;FOXO1
SUMO E3 Ligases SUMOylate Target Proteins R-HSA-3108232	18/168	0.0697667	0.999865	1.51562886597938	4.03551195477701	RANBP2;DAXX;PHC1;NUP188;XRCC4;RING1;VDR;CHD3;HIC1;HDAC7;NCOR2;RXRA;NUP62;NUP54;PPARG;TP53BP1;TP53;NUP37
P53 Transcriptional Gene Network WP4963	11/91	0.0705006	0.995023	1.73492647058824	4.60125841320957	ALDH4A1;DRAM1;APAF1;PERP;AKT1S1;TP53INP1;PRKAG1;PTEN;PRKAG2;CPT1C;THBS1
BL1536 (TREX1)	20/191	0.0705008	0.999929	1.47756406386464	3.91869277463163	RANBP2;EIF4A1;SET;ANP32A;PNO1;TAF10;DDX23;RPA1;WIZ;RPA2;TMC2;DNM2;SMU1;TUBA1B;KIFC1;ECT2;RAD18;RAN;GTF2I;ABCF1
Antiviral mechanism by interferon-stimulated genes	9/70	0.0706143	0.999939	1.86099166890621	4.93260168190993	RANBP2;EIF4A1;NUP188;IRF3;NUP62;NUP54;RAE1;EIF4G3;NUP37
Human adenovirus 36 fiber	9/70	0.0706143	0.998493	1.86099166890621	4.93260168190993	ANKRD44;ANKRD55;ILK;AP2A1;ANK2;ARRB2;VTCN1;RAD23B;NECTIN3
Negative Regulation Of Mitotic Cell Cycle Phase Transition (GO:1901991)	6/40	0.070696	0.965698	2.22458799470709	5.89374978579767	KANK2;DLG1;RGCC;PTEN;PKD2;KLF4
Heart Rate In Heart Failure With Reduced Ejection Fraction	6/40	0.070696	0.654229	2.22458799470709	5.89374978579767	WWOX;PDZD2;CPNE5;UBE2Q2;PPM1H;ANKS1B
PMC4450212 F4	6/40	0.070696	0.772861	2.22458799470709	5.89374978579767	TUBA1B;GPR176;HPS1;HOXA1;DCHS1;DNAJC25
PMC5054603 F4	6/40	0.070696	0.772861	2.22458799470709	5.89374978579767	GABRB3;GNG10;CHRNE;AP2S1;GNG8;MAPK1
Prader Willi And Angelman Syndrome WP3998	12/102	0.0716349	0.995023	1.68259183207848	4.43560384824042	GABRB3;RANBP2;NHLH2;PCSK1;NUP188;BDNF;NUP62;MDM4;NUP54;TP53;RAE1;NUP37
Balding Type 1	19/180	0.0717788	0.656536	1.49065759908413	3.9266396889499	NRP2;LAMC3;RNLS;ZBTB20;RUNX1;SMG6;EDAR;NCOR2;SSPN;PDE3A;REV3L;LNX1;FYN;EIF4G3;LINC02898;MFSD4B;LGR4;CDON;LINC01995
Whole Brain Restricted Directional Diffusion (Multivariate Analysis)	19/180	0.0717788	0.656536	1.49065759908413	3.9266396889499	COL26A1;PKDCC;RNLS;PRKAG2;ACTN4;AMPD3;FNBP1L;BICD1;KIF6;DCDC1;SMG6;SH3RF3;SH3PXD2A;PCCA;SCFD2;DISC1;NBL1;SLC12A8;MCPH1
PMC9528698-NIHMS1835045-supplement-Supp Table 20 6.Xlsx-Control TTN-Gene TTN	19/180	0.0717788	0.999995	1.49065759908413	3.9266396889499	KDM6B;PTGIR;KCNE4;VDR;PCDH11X;C2ORF66;PLA2G2A;ADM;THBS2;HIC1;SMG6;CTU2;RPS18;KIF26B;PIM1;NAA38;LDLR;CCDC150;SPC24
Viral myocarditis	8/60	0.0719946	0.999995	1.94014176949331	5.10483222682246	SGCD;CD80;ABL1;DMD;FYN;HLA-A;EIF4G3;SGCG
PMC6861325 F4	8/60	0.0719946	0.772861	1.94014176949331	5.10483222682246	BMP4;OXTR;MME;BDNF;HGF;SEMA3A;SLIT2;BMPR1B
Yaba-like disease virus 72L protein (gene: 72L)	8/60	0.0719946	0.998493	1.94014176949331	5.10483222682246	ABL1;HOXA1;ACTN4;CTNNA2;LIN7C;SPTAN1;RAD23B;KALRN
Development Of Ureteric Collection System WP5053	8/60	0.0719946	0.995023	1.94014176949331	5.10483222682246	BMP4;GDNF;ILK;RARB;SLIT2;ETV4;BMP7;GLI3
3-Hydroxypropylmercapturic Acid Levels In Smokers	14/124	0.0722551	0.656536	1.60656738737616	4.2213404799593	LINGO2;RBFOX1;THSD7B;KCNE4;MAGI2;PARVB;NR2E3;NOL4;RUNX1;NPAS3;NELL1;PDE11A;TRAF6;TRPM3
Positive Regulation Of Cell Death (GO:0010942)	7/50	0.0722767	0.965698	2.05253973793585	5.39254309702325	EFNB2;BMP4;DAXX;ATG9A;FYN;PRODH;HTATIP2
Regulation Of Epithelial Cell Migration (GO:0010632)	7/50	0.0722767	0.965698	2.05253973793585	5.39254309702325	DOCK5;PTPRR;EMP2;PFN1;DOCK1;PPM1F;PTPRG
White Matter Microstructure (Axial Diusivities)	7/50	0.0722767	0.656536	2.05253973793585	5.39254309702325	PLEKHG1;DRAM1;CAPN12;SH3PXD2A;SEMA3A;AMPD3;SDK2
Cholesterol metabolism	7/50	0.0722767	0.999995	2.05253973793585	5.39254309702325	SCARB1;ABCG5;NCEH1;VAPB;ANGPTL8;CYP7A1;LDLR
Metabolism Of Carbohydrates R-HSA-71387	28/285	0.0728299	0.999865	1.37751268967189	3.60857261315175	SLC25A1;HPSE2;CHPF;NUP188;SDC2;ENO3;ACAN;CHSY1;FUT9;NDST4;NUP62;ST3GAL6;PCK1;RANBP2;SLC37A1;B3GALT4;BPGM;LYVE1;HS3ST4;HS3ST2;GLB1L;CHST1;CSPG4;NUP54;CHST5;SLC25A11;B4GALT4;NUP37
Human immunodeficiency virus 1 Nef (gene: nef)	10/81	0.073333	0.998493	1.77678511258941	4.64228684205736	FGR;DOCK5;SH3PXD2A;ABL1;SH3BP4;FYN;UBASH3A;SPTAN1;DOCK1;KALRN
ACT homodimer complex (human)	1/1	0.0736498	0.395381	18527	48326.4637646632	FHL5
Molybdopterin synthase (human)	1/1	0.0736498	0.395381	18527	48326.4637646632	MOCS2
EPOR receptor complex (human)	1/1	0.0736498	0.395381	18527	48326.4637646632	EPOR
PRMT1 complex (human)	1/1	0.0736498	0.395381	18527	48326.4637646632	PRMT1
TRAF6 oligomer complex (human)	1/1	0.0736498	0.395381	18527	48326.4637646632	TRAF6
p53 homotetramer complex (human)	1/1	0.0736498	0.395381	18527	48326.4637646632	TP53
MAST3	1/1	0.0736498	0.684731	18527	48326.4637646632	PTEN
CDK17	1/1	0.0736498	0.684731	18527	48326.4637646632	CDK17
TP53RK	1/1	0.0736498	0.684731	18527	48326.4637646632	TP53
STK17A	1/1	0.0736498	0.684731	18527	48326.4637646632	TP53
TLK2	1/1	0.0736498	0.684731	18527	48326.4637646632	ASF1A
TSSK2	1/1	0.0736498	0.684731	18527	48326.4637646632	TSKS
PKDCC	1/1	0.0736498	0.684731	18527	48326.4637646632	PKDCC
EPHA5	1/1	0.0736498	0.684731	18527	48326.4637646632	EPHA5
CDK13	1/1	0.0736498	0.684731	18527	48326.4637646632	POLR2A
Human cytomegalovirus	1/1	0.0736498	0.276187	18527	48326.4637646632	TRAF6
Cottontail rabbit papillomavirus	1/1	0.0736498	0.276187	18527	48326.4637646632	DLG1
Human adenovirus 9	1/1	0.0736498	0.276187	18527	48326.4637646632	DLG1
Human herpesvirus 6	1/1	0.0736498	0.276187	18527	48326.4637646632	MAPK1
Gluconeogenesis	5/31	0.073972	0.999939	2.4236271221966	6.31129150365104	SLC25A1;GOT1;PCK1;ENO3;SLC25A11
Keratan sulfate/keratin metabolism	5/31	0.073972	0.999939	2.4236271221966	6.31129150365104	ACAN;CHST1;ST3GAL6;CHST5;B4GALT4
PRG3	5/31	0.073972	0.954599	2.4236271221966	6.31129150365104	POGLUT1;ITGB5;SLIT2;LDLR;TUBA4A
Glutamine Family Amino Acid Metabolic Process (GO:0009064)	5/31	0.073972	0.965698	2.4236271221966	6.31129150365104	ALDH4A1;GOT1;PRODH;GCLM;RIMKLB
Negative Regulation Of Chemotaxis (GO:0050922)	5/31	0.073972	0.965698	2.4236271221966	6.31129150365104	ANGPT2;DUSP3;SEMA3A;SLIT2;THBS1
Potassium Ion Transmembrane Transporter Activity (GO:0015079)	5/31	0.073972	0.982896	2.4236271221966	6.31129150365104	SLC12A2;KCNK16;PKD2;SLC12A8;HCN1
Systolic Blood Pressure X Smoking Status (Current Vs Non-Current) Interaction (2Df Test)	5/31	0.073972	0.656536	2.4236271221966	6.31129150365104	HOTTIP;CFDP1;KCNE4;TNFSF12;NAA38
Diastolic Blood Pressure X Smoking Status (Current Vs Non-Current) Interaction (2Df Test)	5/31	0.073972	0.656536	2.4236271221966	6.31129150365104	HOTTIP;CFDP1;KCNE4;TNFSF12;NAA38
Response To Paliperidone In Schizophrenia (PANSS Score)	5/31	0.073972	0.656536	2.4236271221966	6.31129150365104	CCDC122;SGCD;CALD1;LNX1;TOX
PMC2374711 F5	5/31	0.073972	0.772861	2.4236271221966	6.31129150365104	RXRA;ETV4;FOXO1;SND1;RUNX1
PMC6886211 F8	5/31	0.073972	0.772861	2.4236271221966	6.31129150365104	FGR;ABL1;FYN;FOXO3;EPOR
PMC10243915-uxad037 Suppl Supplementary Table S1B-Table s3b.pdf-467-LIMK2 LIMK2	5/31	0.073972	0.999995	2.4236271221966	6.31129150365104	CTU2;AGTRAP;NAA16;C1GALT1C1L;CEP43
Double-strand break repair	4/22	0.073989	0.999939	2.79993949020498	7.29058962874373	XRCC4;RPA1;RPA2;TP53BP1
SLC27A2	4/22	0.073989	0.954599	2.79993949020498	7.29058962874373	PRKCSH;PNPLA3;CNPPD1;ROPN1
Acylglycerol Biosynthetic Process (GO:0046463)	4/22	0.073989	0.965698	2.79993949020498	7.29058962874373	GPAM;PNPLA3;ANG;GPAT3
Blood Vessel Endothelial Cell Migration (GO:0043534)	4/22	0.073989	0.965698	2.79993949020498	7.29058962874373	EFNB2;NELL1;EMP2;SLIT2
Placenta Development (GO:0001890)	4/22	0.073989	0.965698	2.79993949020498	7.29058962874373	CITED1;ANG;PPARG;PKD2
Regulation Of Release Of Sequestered Calcium Ion Into Cytosol By Sarcoplasmic Reticulum (GO:0010880)	4/22	0.073989	0.965698	2.79993949020498	7.29058962874373	CASQ2;ANK2;DMD;TRDN
Fibromuscular Dysplasia	4/22	0.073989	0.656536	2.79993949020498	7.29058962874373	CARMIL1;FAM184A;LINC01470;FHL5
Opioid Analgesic Dose Requirement In Cancer Pain Treatment	4/22	0.073989	0.656536	2.79993949020498	7.29058962874373	RBFOX1;DLGAP1;TFB1M;LINC01036
Retinal Detachment Or Retinal Break	4/22	0.073989	0.656536	2.79993949020498	7.29058962874373	FSTL5;BMP3;COL2A1;PLXDC2
Hepatocyte Growth Factor Levels	4/22	0.073989	0.656536	2.79993949020498	7.29058962874373	TMEM132D;CALD1;DPH1;HGF
Hair Curvature (Quantitative)	4/22	0.073989	0.656536	2.79993949020498	7.29058962874373	KIRREL3;WWOX;PRAG1;SSPN
Low Testosterone Levels	4/22	0.073989	0.656536	2.79993949020498	7.29058962874373	DNAH2;PNPLA3;CD68;SENP3
PMC7697769 F4a	4/22	0.073989	0.772861	2.79993949020498	7.29058962874373	IRF3;TRAF6;TIRAP;NFKBIB
PMC7268289 F7	4/22	0.073989	0.772861	2.79993949020498	7.29058962874373	IRF3;TRAF6;PTEN;TIRAP
PMC5485083 F2	4/22	0.073989	0.772861	2.79993949020498	7.29058962874373	RPL32;PTPRN;ANK2;SYNJ2
PMC5697091 F7	4/22	0.073989	0.772861	2.79993949020498	7.29058962874373	IRF3;CD80;TRAF6;TIRAP
PMC5697091 F8	4/22	0.073989	0.772861	2.79993949020498	7.29058962874373	IRF3;CD80;TRAF6;TIRAP
PMC6406345 F3	4/22	0.073989	0.772861	2.79993949020498	7.29058962874373	RXRB;RING1;COL11A2;HSD17B8
PMC6563119 F1	4/22	0.073989	0.772861	2.79993949020498	7.29058962874373	MAP4K1;IRF3;FOXO3;FOXO1
PMC6718713 F1	4/22	0.073989	0.772861	2.79993949020498	7.29058962874373	NPS;GDNF;TRAF6;PTEN
ERK/MAPK Targets R-HSA-198753	4/22	0.073989	0.999865	2.79993949020498	7.29058962874373	DUSP3;RPS6KA2;MAPK1;DUSP7
Signaling By NODAL R-HSA-1181150	4/22	0.073989	0.999865	2.79993949020498	7.29058962874373	MAPK1;TDGF1P3;FOXO3;PCSK6
PMC7848376-SCT3-10-251-s003.docx-3-PI3K-AKT SIGNALING PATHWAY TARGET GENES N 209 3 AKT1	4/22	0.073989	0.999995	2.79993949020498	7.29058962874373	COL5A1;CDC37;PTEN;FOXO3
NAD Metabolism In Oncogene Induced Senescence And Mitochondrial Dysfunction Associated Senescence WP5046	4/22	0.073989	0.995023	2.79993949020498	7.29058962874373	GOT1;HMGA1;TP53;SIRT2
Squamous Cell Lung Carcinoma	9/71	0.0758456	0.670886	1.8308765203596	4.72193295007394	CARMIL1;CYP2A6;NPFFR1;CATSPER2;PRAG1;XRCC4;POLR1H;ECPAS;NPAS3
SC-28673 (ATF1)	13/114	0.0762459	0.999929	1.62442696324427	4.18093686183224	RANBP2;SAR1A;RPL22;ACTN4;SRP14;SCAF1;DNM2;HNRNPL;TUBA1B;RPL29;A2M;SPTAN1;GTF2I
Total Bilirubin Levels	20/193	0.0766078	0.673514	1.46032326977471	3.75165247523089	PRMT6;CARMIL1;SCARB1;STEAP1B;ZBTB20;AHR;CHD3;UBE2L3;SMG6;HK1;RXRA;AUH;GPAM;SLCO1A2;PDE3A;REV3L;PNPLA3;PIEZO1;IAPP;MFSD4B
PMC7146499 F2	8/61	0.0777816	0.772861	1.90343228797733	4.86108079284152	SDCBP;DLG1;SYNGAP1;BDNF;DLGAP1;ZFPM1;KALRN;HK1
Nuclear Events (Kinase And Transcription Factor Activation) R-HSA-198725	8/61	0.0777816	0.999865	1.90343228797733	4.86108079284152	DUSP3;GDNF;RPS6KA2;MAPK1;F3;DNM2;DUSP7;CDK5R1
Post NMDA Receptor Activation Events R-HSA-438064	8/61	0.0777816	0.999865	1.90343228797733	4.86108079284152	MPP2;DLG1;RPS6KA2;PRKAG1;PRKAG2;NEFL;MAPK1;RNASE1
Golgi to Endosome Transport	6/41	0.0779042	0.984226	2.16091148115688	5.51524160415574	STX12;SNX4;GOLGA4;STX16;M6PR;DNM2
G81295CK	6/41	0.0779042	0.97601	2.16091148115688	5.51524160415574	FOXO3;THBS2;IL6ST;THBS1;SIGLEC7;LTF
Heart Contraction (GO:0060047)	6/41	0.0779042	0.965698	2.16091148115688	5.51524160415574	SGCD;CASQ2;DMD;SGCZ;SGCG;TRDN
Negative Regulation Of DNA Recombination (GO:0045910)	6/41	0.0779042	0.965698	2.16091148115688	5.51524160415574	MAD2L2;PARP3;PARPBP;TERF2IP;TP53BP1;SENP3
Coronary Artery Calcified Atherosclerotic Plaque (130 HU Threshold) In Type 2 Diabetes	6/41	0.0779042	0.673514	2.16091148115688	5.51524160415574	PTPRN2;DTNA;MAGI2;PDE3A;LINC01426;LINC00378
Non-integrin membrane-ECM Interactions R-HSA-3000171	6/41	0.0779042	0.999865	2.16091148115688	5.51524160415574	ITGB5;LAMC3;SDC2;DMD;FGF13;THBS1
PMC8432961-Table 1.doc-1-ABL1 ABL1	6/41	0.0779042	0.999995	2.16091148115688	5.51524160415574	KLF6;PLEKHG5;BUB1B;MAPK1;PAK3;TP53
PMC3937232-pgen.1004148.s018.docx-0-Table S4 Candidate Regions Identified By CLR Analysis 5 DCLK3	6/41	0.0779042	0.999995	2.16091148115688	5.51524160415574	TMEM132D;LAMC3;NRG4;SPTAN1;NECTIN3;NPAS3
Neurotransmitter Receptors And Postsynaptic Signal Transmission R-HSA-112314	19/182	0.0781694	0.999865	1.47220698559506	3.75247534200482	GABRB3;MPP2;PRKAG1;PRKAG2;AP2A1;LIN7C;RNASE1;GRIP2;ADCY6;PPM1F;GNG10;DLG1;RPS6KA2;UBD;CHRNE;AP2S1;NEFL;GNG8;MAPK1
PMC9528698-NIHMS1835045-supplement-Supp Table 27 4.xlsx-TTN control-Gene TTN	19/182	0.0781694	0.999995	1.47220698559506	3.75247534200482	CARMIL1;ANKRD33B;FHL5;FOXO3;PLXDC2;KALRN;BICD1;FOXO1;NPAS3;PTPRG;EFNB2;NFASC;RPS6KA2;KCNQ3;MAN1A1;FYN;SHOC1;RAPGEF5;ARGLU1
CDK16 human kinase ARCHS4 coexpression	29/299	0.0782046	0.999996	1.35798963783728	3.46073735100021	MTCH1;NUP188;PRKCSH;WIZ;SLC1A5;TOMM20;STRN4;ABL1;WDR5;KIF1C;SLC39A7;SH3GLB2;ICMT;PRMT1;MINK1;ATG9A;PTOV1;ACTN4;SCAF1;RAD23B;SENP3;SND1;HNRNPL;NCOR2;ILF3;KIFC1;CDC37;AKT1S1;PRR12
EPHB1 human kinase ARCHS4 coexpression	29/299	0.0782046	0.999996	1.35798963783728	3.46073735100021	GABRB3;DRAXIN;PGAP1;TENM4;PLPPR2;NTM;FNBP1L;KALRN;BICD1;NPAS3;ELAVL3;PCBP4;LRRTM4;CTNNA2;PAK3;RIMKLB;DTNA;NCBP2;ANK2;ATP1B2;SORCS3;CORO2B;DISP3;NFASC;ADGRB3;NOVA1;CHST1;TERF2IP;CDK5R1
RNASEL human kinase ARCHS4 coexpression	29/299	0.0782046	0.999996	1.35798963783728	3.46073735100021	BCAR3;DOCK5;ANP32A;NUP188;PKN3;PRR5L;MTHFD1L;PIEZO2;WDR5;PIEZO1;ZNF469;CCT5;HTATIP2;PDIA3;CAST;ABCC1;WNT7B;RASSF8;ACTN4;SENP3;DUSP7;SMU1;DNAJA1;GOLPH3;COL5A1;PDE3A;ALPL;ATXN10;B4GALT4
Negative Regulation Of MAP Kinase Activity (GO:0043407)	7/51	0.078715	0.965698	2.00578258712638	5.09854274244878	BMP4;DNAJA1;CAV3;PPARG;BMP7;ANKS1B;DUSP7
Positive Regulation Of Actin Filament Bundle Assembly (GO:0032233)	7/51	0.078715	0.965698	2.00578258712638	5.09854274244878	CARMIL1;NELL1;RGCC;PLEK;PFN1;RAPGEF3;PPM1F
Total Cholines Levels	7/51	0.078715	0.673514	2.00578258712638	5.09854274244878	DOCK6;SCARB1;GPAM;TMPRSS11E;TRIM31;CD300LG;UBE2L3
Ascending Aorta Minimum Area	7/51	0.078715	0.673514	2.00578258712638	5.09854274244878	PTPRR;FGD5;KALRN;ELL2;THSD4;DCDC1;SMG6
R-6-hydroxywarfarin Levels	7/51	0.078715	0.673514	2.00578258712638	5.09854274244878	NCOR2;WWOX;ABCC1;DNAH2;PTPRN2;SHROOM3;WRAP53
PMC3888473 F3	7/51	0.078715	0.772861	2.00578258712638	5.09854274244878	ABCC1;CYP2A6;HGF;CYP7A1;ABCG1;FOXO1;ABCG2
Sumoylation by RanBP2 Regulates Transcriptional Repression Homo sapiens h ranbp2Pathway	3/14	0.0787848	0.948896	3.43525046382189	8.72909115382892	RANBP2;NUP62;RAN
Activation of Rac	3/14	0.0787848	0.999939	3.43525046382189	8.72909115382892	PAK6;SLIT2;PAK3
Retrograde neurotrophin signaling	3/14	0.0787848	0.999939	3.43525046382189	8.72909115382892	AP2S1;AP2A1;DNM2
POLL	3/14	0.0787848	0.954599	3.43525046382189	8.72909115382892	NOSIP;SYN2;LTF
POP7	3/14	0.0787848	0.954599	3.43525046382189	8.72909115382892	RPP21;KBTBD7;RRP8
Oxidative Stress in Amyotrophic Lateral Sclerosis	3/14	0.0787848	0.984226	3.43525046382189	8.72909115382892	KEAP1;PPARG;GCLM
Genes with Mutations Associated with Primary Ovarian Insufficiency	3/14	0.0787848	0.984226	3.43525046382189	8.72909115382892	PTEN;FOXO3;INHA
PNPLA3 in non-Alcoholic Fatty Liver Disease	3/14	0.0787848	0.984226	3.43525046382189	8.72909115382892	PNPLA3;LDLR;FOXO1
Proteins Involved in Urolithiasis	3/14	0.0787848	0.984226	3.43525046382189	8.72909115382892	AHSG;VDR;SPP1
Negative Regulation Of Smooth Muscle Cell Migration (GO:0014912)	3/14	0.0787848	0.965698	3.43525046382189	8.72909115382892	BMP4;SLIT2;PRKG1
Regulation Of Carbohydrate Catabolic Process (GO:0043470)	3/14	0.0787848	0.965698	3.43525046382189	8.72909115382892	SCARB2;PRKAG1;PRKAG2
Regulation Of Cholesterol Storage (GO:0010885)	3/14	0.0787848	0.965698	3.43525046382189	8.72909115382892	SCARB1;PPARG;ABCG1
Transmembrane-Ephrin Receptor Activity (GO:0005005)	3/14	0.0787848	0.982896	3.43525046382189	8.72909115382892	EPHA5;EPHA7;EFNB3
Clathrin Adaptor Activity (GO:0035615)	3/14	0.0787848	0.982896	3.43525046382189	8.72909115382892	AP2S1;AP2A1;AP1M2
Cleft Lip With Or Without Cleft Palate	3/14	0.0787848	0.673514	3.43525046382189	8.72909115382892	PAX7;ABCA4;SHROOM3
Gut Microbiota Alpha Diversity (PD Whole Tree Index)	3/14	0.0787848	0.673514	3.43525046382189	8.72909115382892	OSBPL6;TENM4;DNTTIP2
IgM Levels	3/14	0.0787848	0.673514	3.43525046382189	8.72909115382892	FXR2;SENP3;ABCF1
Glomerular Filtration Rate In Chronic Kidney Disease	3/14	0.0787848	0.673514	3.43525046382189	8.72909115382892	LINC01010;CT69;ZNF343
Waist-to-hip Ratio Adjusted For BMI X Sex Interaction	3/14	0.0787848	0.673514	3.43525046382189	8.72909115382892	IQGAP2;SGCZ;F2RL2
Median Measurement Of Hepatic Fat	3/14	0.0787848	0.673514	3.43525046382189	8.72909115382892	SAMM50;PNPLA3;PARVB
HIPK2	3/14	0.0787848	0.684731	3.43525046382189	8.72909115382892	HMGA1;TP53;RUNX1
PMC2537559 F5	3/14	0.0787848	0.772861	3.43525046382189	8.72909115382892	PTEN;ILK;DOCK1
PMC2673912 F8	3/14	0.0787848	0.772861	3.43525046382189	8.72909115382892	ELK4;RXRA;VDR
PMC2856775 F1a	3/14	0.0787848	0.772861	3.43525046382189	8.72909115382892	IRF3;TRAF6;TIRAP
PMC7403652 F4	3/14	0.0787848	0.772861	3.43525046382189	8.72909115382892	AIFM2;PERP;PTEN
PMC6318069 F1	3/14	0.0787848	0.772861	3.43525046382189	8.72909115382892	BMP4;EDAR;TRAF6
PMC3143653 F6	3/14	0.0787848	0.772861	3.43525046382189	8.72909115382892	PPARG;KIF6;TP53
PMC7775514 F1	3/14	0.0787848	0.772861	3.43525046382189	8.72909115382892	IRF3;TRAF6;TIRAP
PMC3342043 F1	3/14	0.0787848	0.772861	3.43525046382189	8.72909115382892	IRF3;TRAF6;TIRAP
PMC6949159 F5	3/14	0.0787848	0.772861	3.43525046382189	8.72909115382892	AIFM2;PERP;PTEN
PMC7593574 F2	3/14	0.0787848	0.772861	3.43525046382189	8.72909115382892	IRF3;CD80;TRAF6
PMC3508562 F2	3/14	0.0787848	0.772861	3.43525046382189	8.72909115382892	IRF3;TRAF6;TIRAP
PMC7598701 F10	3/14	0.0787848	0.772861	3.43525046382189	8.72909115382892	AIFM2;PERP;PTEN
PMC7231083 F1	3/14	0.0787848	0.772861	3.43525046382189	8.72909115382892	IRF3;TRAF6;TIRAP
PMC6928143 F3	3/14	0.0787848	0.772861	3.43525046382189	8.72909115382892	CDC37;PTEN;ILK
PMC7937231 F10	3/14	0.0787848	0.772861	3.43525046382189	8.72909115382892	MAD2L2;ILK;DOCK1
PMC7343132 F3	3/14	0.0787848	0.772861	3.43525046382189	8.72909115382892	IRF3;TRAF6;TIRAP
PMC3881972 F1	3/14	0.0787848	0.772861	3.43525046382189	8.72909115382892	IRF3;TRAF6;TIRAP
PMC3940969 F2	3/14	0.0787848	0.772861	3.43525046382189	8.72909115382892	IRF3;TRAF6;TIRAP
PMC4200202 F7	3/14	0.0787848	0.772861	3.43525046382189	8.72909115382892	COL2A1;CDC37;LOXL4
PMC4237867 F1	3/14	0.0787848	0.772861	3.43525046382189	8.72909115382892	IRF3;TRAF6;TIRAP
PMC4325920 F1	3/14	0.0787848	0.772861	3.43525046382189	8.72909115382892	SYNGAP1;PTEN;FYN
PMC4604214 F3	3/14	0.0787848	0.772861	3.43525046382189	8.72909115382892	KMT2D;SEMA3A;GLI3
PMC4687899 F2	3/14	0.0787848	0.772861	3.43525046382189	8.72909115382892	GOT1;SLC1A5;HK1
PMC5061804 F1	3/14	0.0787848	0.772861	3.43525046382189	8.72909115382892	PTEN;FOXO3;FOXO1
PMC5107592 F1	3/14	0.0787848	0.772861	3.43525046382189	8.72909115382892	IRF3;TRAF6;TIRAP
PMC5240660 F1	3/14	0.0787848	0.772861	3.43525046382189	8.72909115382892	MTCH1;TMCC2;PI16
PMC5328971 F3	3/14	0.0787848	0.772861	3.43525046382189	8.72909115382892	SLC12A2;GABRB3;BDNF
PMC5553087 F1	3/14	0.0787848	0.772861	3.43525046382189	8.72909115382892	IRF3;TRAF6;TIRAP
PMC5666637 F3	3/14	0.0787848	0.772861	3.43525046382189	8.72909115382892	BMP4;SOST;BMPR1B
PMC5733474 F2	3/14	0.0787848	0.772861	3.43525046382189	8.72909115382892	RRAS;PTEN;TP53
PMC5746087 F7	3/14	0.0787848	0.772861	3.43525046382189	8.72909115382892	CDC37;PTEN;ILK
PMC5908130 F5	3/14	0.0787848	0.772861	3.43525046382189	8.72909115382892	PTEN;FYN;TP53
PMC6059697 F11	3/14	0.0787848	0.772861	3.43525046382189	8.72909115382892	GDNF;PERP;PTEN
PMC6273696 F28	3/14	0.0787848	0.772861	3.43525046382189	8.72909115382892	ENDOG;APAF1;GAS2
PMC6689672 F3	3/14	0.0787848	0.772861	3.43525046382189	8.72909115382892	AHR;CD33;CXCL16
PMC6756057 F2	3/14	0.0787848	0.772861	3.43525046382189	8.72909115382892	BCL9;SOST;LGR4
DCC Mediated Attractive Signaling R-HSA-418885	3/14	0.0787848	0.999865	3.43525046382189	8.72909115382892	FYN;RNASE1;DOCK1
Retrograde Neurotrophin Signaling R-HSA-177504	3/14	0.0787848	0.999865	3.43525046382189	8.72909115382892	AP2S1;AP2A1;DNM2
TP53 Regulates Transcription Of Genes Involved In G1 Cell Cycle Arrest R-HSA-6804116	3/14	0.0787848	0.999865	3.43525046382189	8.72909115382892	CCNE2;PCBP4;TP53
PMC9528698-NIHMS1835045-supplement-Supp Table 59 4.xlsx-TTN control-Gene TTN	3/14	0.0787848	0.999995	3.43525046382189	8.72909115382892	HS3ST4;KIF6;PTPRG
PMC4028079-12864 2013 7037 MOESM2 ESM.xlsx-GWAS-GWE-GWL analysis-GWE-GWAS MASTL	68/778	0.0791133	0.999995	1.21453160242594	3.08111391497774	GABRB3;RYR1;SCARB1;TENM2;CPQ;CEP164;PRKAG2;ETFB;AHR;SIPA1L2;ENO3;RYR3;UBE2L3;GPR176;PIP4P2;STBD1;PIEZO2;WDR5;KIF1C;SERAC1;CD33;RBFOX1;ABCG5;MME;KRT4;CCDC158;HGF;ECH1;MINK1;SFTPD;MAGI2;HLA-A;SORCS3;TIAM2;CCNE2;PAX7;ELMO1;RAPGEF5;SMPDL3B;CDH17;NECAB1;MARCHF1;NTM;AFG1L;IQGAP2;PDZD2;TESPA1;TP53INP1;MAPK1;CAMTA2;SLIT2;LINGO2;TMEM132D;CARMIL1;SDF2L1;SLC10A7;DTNA;PTPRN2;ZNF804B;CADPS;SLC52A1;LRFN2;NFASC…
Hemoglobin	45/493	0.0794799	0.677391	1.27168836284514	3.22023368191135	DGKG;PKDCC;DNAH2;STX16;SPO11;PRKAG2;MLLT3;KALRN;NR2E3;SMG6;UBE2L3;HK1;DYNC2LI1;FGD5;RXRA;LINC01968;UBE2Q2;PRRG2;TP53INP1;PIEZO1;TP53BP1;PCK1;SBF2;WWOX;MBNL1;EGLN3;RNLS;BDNF;WNT7B;UBE2E3;ITGA1;NOSIP;SHROOM3;AMPD3;MYO9A;RUNX1;NCOR2;CTU2;NDUFAF6;NRG4;PNPLA3;CCDC192;DCHS1;PPARG;BMPR1B
PMC5671979 F6	11/93	0.0797038	0.772861	1.69242768009075	4.28089036113741	SENP5;RABGAP1;PHF1;SCHIP1;KIF26B;MINK1;PDE3A;CROT;TOX;RC3H2;ASF1A
PMC6879499 F3	11/93	0.0797038	0.772861	1.69242768009075	4.28089036113741	EIF4A1;AKT1S1;PLA2G2A;PRKAG1;PTEN;KEAP1;MAPK1;PPARG;FOXO3;TP53;RAPGEF3
PMC8369408-NIHMS1727018-supplement-3.xlsx-BRAF Bivalent Unique-Unnamed 1 BRAF	11/93	0.0797038	0.999995	1.69242768009075	4.28089036113741	DGKG;DIPK1C;ADGRG2;CITED1;NRG4;ZNF804B;BHLHE41;SSPN;PIN4;BMPR1B;ARFGEF3
HIV Infection R-HSA-162906	23/229	0.0802737	0.999865	1.41072313357884	3.55828490714163	RANBP2;PSMD11;XRCC4;NUP188;NCBP2;VTA1;TAF10;HMGA1;AP2A1;HLA-A;RNASE1;GTF2H5;PSMB6;PSMD7;POLR2A;NUP62;AP2S1;ELMO1;NUP54;FYN;AP1M2;RAN;NUP37
Low Density Lipoprotein Cholesterol Levels	66/754	0.080764	0.680535	1.21627535082065	3.06042149903375	DOCK6;SCARB1;UBXN2B;SLC44A2;RAB3D;CEP164;AHR;KRI1;PCSK6;RESF1;UBE2L3;HK1;SGCD;PRMT6;PLEKHG1;ABCG5;ZER1;ITGA1;SHROOM3;TM4SF5;TMPRSS11E;SORCS2;HIC1;TIRAP;DNM2;BACE1;QTRT1;ILF3;CYP2A6;ELF1;ANGPTL8;PRKD2;PPARG;TDGF1P3;ZFPM1;TP53;NSMAF;ATG4D;KANK2;AGPAT5;PLEKHH2;PKN3;ABCB4;FBLN1;CYP7A1;CAND2;SV2C;DPH1;ZNF148;LDLR;CD300LG;AP1M2;NTSR1;WWOX;CARMIL1;ZFHX3;PHC1;M6PR;CYP4F12;GPAM;PNPLA3;SRPRA;LNX1;SHBG;TRIM…
PMC5642581-oncotarget-08-70617-s002.xlsx-CDK1 Substrates-Hgnc Symbol CDK1	19/183	0.0815021	0.999995	1.4631504344617	3.66830352481335	PDIA3;OGFR;DCTN6;RANBP2;ERCC6L;UBXN2B;HMGA1;BUB1B;RPA2;FOXO1;SIRT2;DNM2;DLG1;RGCC;MDM4;TPP1;ECT2;TP53;TMPO
Alpha-synuclein signaling	5/32	0.082606	0.999939	2.33373700676153	5.81957763967751	FGR;MAPK1;FYN;PLD2;UBE2L3
Netrin-mediated signaling events	5/32	0.082606	0.999939	2.33373700676153	5.81957763967751	ELMO1;MAPK1;FYN;UNC5C;DOCK1
Signaling by Robo receptor	5/32	0.082606	0.999939	2.33373700676153	5.81957763967751	ABL1;PAK6;SLIT2;PAK3;PFN1
Muscle Cell Development (GO:0055001)	5/32	0.082606	0.965698	2.33373700676153	5.81957763967751	CAV3;DMD;ANK2;ACTN4;SGCZ
Negative Regulation Of G1/S Transition Of Mitotic Cell Cycle (GO:2000134)	5/32	0.082606	0.965698	2.33373700676153	5.81957763967751	KANK2;DLG1;PTEN;PKD2;KLF4
Regulation Of Calcium Ion Transmembrane Transporter Activity (GO:1901019)	5/32	0.082606	0.965698	2.33373700676153	5.81957763967751	CACNB3;CAV3;DMD;ANK2;STRIT1
Alpha-synuclein signaling Homo sapiens 588134bc-6187-11e5-8ac5-06603eb7f303	5/32	0.082606	0.991991	2.33373700676153	5.81957763967751	FGR;MAPK1;FYN;PLD2;UBE2L3
PMC7907897 F2	5/32	0.082606	0.772861	2.33373700676153	5.81957763967751	ABCC1;KEAP1;AHR;GCLM;ABCG2
PMC4167267 F7	5/32	0.082606	0.772861	2.33373700676153	5.81957763967751	RANBP2;PTEN;KEAP1;TP53;FOXO1
Defective TPR May Confer Susceptibility Towards Thyroid Papillary Carcinoma (TPC) R-HSA-5619107	5/32	0.082606	0.999865	2.33373700676153	5.81957763967751	RANBP2;NUP188;NUP62;NUP54;NUP37
Gluconeogenesis R-HSA-70263	5/32	0.082606	0.999865	2.33373700676153	5.81957763967751	SLC25A1;SLC37A1;PCK1;ENO3;SLC25A11
PMC6262310-Table 4.XLSX-miR-664-TGFBR2 TGFBR2	5/32	0.082606	0.999995	2.33373700676153	5.81957763967751	DLG1;ABL1;HLA-A;GNL1;ZFPM1
IL 17 Signaling Pathway WP2112	5/32	0.082606	0.995023	2.33373700676153	5.81957763967751	TRAF3IP2;TRAF6;MAPK1;IL17C;NFKBIB
13Q12 12 Copy Number Variation WP5406	5/32	0.082606	0.995023	2.33373700676153	5.81957763967751	SGCD;DTNA;SSPN;DMD;SGCG
Signaling events mediated by focal adhesion kinase	8/62	0.0838385	0.999939	1.86808241688788	4.63071976446225	ITGB5;RRAS;ELMO1;MAPK1;FYN;ACTN4;DOCK1;ARHGAP35
PMC3945331 F5	8/62	0.0838385	0.772861	1.86808241688788	4.63071976446225	DNAJA1;DAXX;PSMD7;RPS18;DNAJB11;PTEN;FYN;SOST
PMC3152520-1479-5876-9-119-S2.XLS-Sheet1-MAPK15 MAPK15	8/62	0.0838385	0.999995	1.86808241688788	4.63071976446225	CDK17;CDK18;NUAK2;OTUD6B;MINK1;PAK6;NMBR;PAK3
Induction of apoptosis through DR3 and DR4/5 Death Receptors Homo sapiens h deathPathway	4/23	0.0845731	0.948896	2.65243094120598	6.55187253555847	TNFSF12;GAS2;TNFRSF25;SPTAN1
Hypoxia and p53 in the cardiovascular system	4/23	0.0845731	0.999939	2.65243094120598	6.55187253555847	RPA1;TP53;HIC1;NFKBIB
Signaling events mediated by PRL	4/23	0.0845731	0.999939	2.65243094120598	6.55187253555847	TUBA1B;ITGA1;MAPK1;ATF5
TPRA1	4/23	0.0845731	0.954599	2.65243094120598	6.55187253555847	ATG9A;DOLK;ATP13A3;BMPR1B
ZNF703	4/23	0.0845731	0.954599	2.65243094120598	6.55187253555847	SUPV3L1;ESRP1;HOXA1;SLC25A11
TYW3	4/23	0.0845731	0.954599	2.65243094120598	6.55187253555847	NELL1;BUB1B;FBLN1;LDLR
PAK7	4/23	0.0845731	0.954599	2.65243094120598	6.55187253555847	CCDC138;GMPPA;FBLN1;OBSL1
TSSC1	4/23	0.0845731	0.954599	2.65243094120598	6.55187253555847	DHH;VPS52;TUBA4A;CCT5
LRP10	4/23	0.0845731	0.954599	2.65243094120598	6.55187253555847	TMPRSS3;MRAP2;TRDN;TMEM231
G84467IZ	4/23	0.0845731	0.97601	2.65243094120598	6.55187253555847	AHSG;SPP1;SHBG;LTF
Cholesterol Efflux (GO:0033344)	4/23	0.0845731	0.965698	2.65243094120598	6.55187253555847	SCARB1;STX12;ABCG5;ABCG1
Positive Regulation Of Cell-Substrate Junction Organization (GO:0150117)	4/23	0.0845731	0.965698	2.65243094120598	6.55187253555847	NELL1;DUSP3;IQSEC1;PPM1F
Positive Regulation Of Neuron Apoptotic Process (GO:0043525)	4/23	0.0845731	0.965698	2.65243094120598	6.55187253555847	BACE1;EPHA7;FOXO3;CDK5R1
Protein Alkylation (GO:0008213)	4/23	0.0845731	0.965698	2.65243094120598	6.55187253555847	PRMT1;PRMT3;PRDM12;SNRPB
Protein Targeting To ER (GO:0045047)	4/23	0.0845731	0.965698	2.65243094120598	6.55187253555847	ZFAND2B;SRPRA;MAN1A1;SRP14
Cyclosporin A Binding (GO:0016018)	4/23	0.0845731	0.982896	2.65243094120598	6.55187253555847	RANBP2;PPIL1;PPP3R1;PPIL2
Caffeine Consumption From Coffee Or Tea	4/23	0.0845731	0.680535	2.65243094120598	6.55187253555847	CYP2A6;BDNF;AHR;ABCG2
HIV-1 Control	4/23	0.0845731	0.680535	2.65243094120598	6.55187253555847	WDR27;POLR1HASP;DISC1FP1;RUNX1
Rubella	4/23	0.0845731	0.680535	2.65243094120598	6.55187253555847	RBFOX1;LRRTM4;LINC02532;TRPM3
Myringotomy	4/23	0.0845731	0.680535	2.65243094120598	6.55187253555847	TENM2;LINC01376;HECW2;CTNNA2
CHEK2	4/23	0.0845731	0.684731	2.65243094120598	6.55187253555847	BDNF;REV3L;MDM4;TP53
Signaling events mediated by PRL Homo sapiens bb67523a-6195-11e5-8ac5-06603eb7f303	4/23	0.0845731	0.991991	2.65243094120598	6.55187253555847	TUBA1B;ITGA1;MAPK1;ATF5
PMC7116212 F6	4/23	0.0845731	0.772861	2.65243094120598	6.55187253555847	NOP56;LSG1;IMP3;RAN
PMC6625878 F1	4/23	0.0845731	0.772861	2.65243094120598	6.55187253555847	ANGPT2;ADM;HK1;ABCG2
PMC3612515 F1	4/23	0.0845731	0.772861	2.65243094120598	6.55187253555847	PRMT1;CPOX;PAK3;TP53
PMC6953027 F1	4/23	0.0845731	0.772861	2.65243094120598	6.55187253555847	BMP4;BDNF;HGF;TRAF6
PMC3733962 F1	4/23	0.0845731	0.772861	2.65243094120598	6.55187253555847	SH3BP4;ACTN4;TP53;UBE2L3
PMC4199593 F6	4/23	0.0845731	0.772861	2.65243094120598	6.55187253555847	IRF3;TRAF6;PIM1;TIRAP
PMC5445595 F3	4/23	0.0845731	0.772861	2.65243094120598	6.55187253555847	PERP;TP53INP1;PPARG;TP53
PMC5847265 F1	4/23	0.0845731	0.772861	2.65243094120598	6.55187253555847	SCARB1;ABCG5;CYP7A1;LDLR
Dopamine Neurotransmitter Release Cycle R-HSA-212676	4/23	0.0845731	0.999865	2.65243094120598	6.55187253555847	LIN7C;SYN2;PPFIA4;PPFIA2
PMC4022506-pone.0096612.s003.xlsx-BRAF Gene set-Unnamed 3 BRAF	4/23	0.0845731	0.999995	2.65243094120598	6.55187253555847	DES;SPP1;THBS2;THBS1
PMC5355058-oncotarget-08-12820-s003.xlsx-Exclusive DM genes-N1 X N2 DMPK	4/23	0.0845731	0.999995	2.65243094120598	6.55187253555847	ZBTB9;TRIM39;ZFPM1;SERF2
GDNF RET Signaling Axis WP4830	4/23	0.0845731	0.995023	2.65243094120598	6.55187253555847	BMP4;GDNF;SLIT2;GLI3
Kynurenine Pathway And Links To Cell Senescence WP5044	4/23	0.0845731	0.995023	2.65243094120598	6.55187253555847	AHR;EIF2AK4;TP53;FOXO1
PMC5189935-pmed.1002201.s013.xlsx-HR-HER2- Amplification-3Q26 31 ERBB2	19/184	0.0849272	0.999995	1.45420365970572	3.5860097143584	DGKG;CRYGS;TBCCD1;AHSG;NCBP2;PIGZ;SPATA16;DLG1;LSG1;NCEH1;SENP5;TMEM44;DNAJB11;FETUB;FAM43A;MELTF;ATP13A3;ECT2;HRG
Cellular Response To Organonitrogen Compound (GO:0071417)	12/105	0.0849723	0.965698	1.62804972290301	4.01384167838716	GABRB3;GOLPH3;DHX8;NEURL1;PDE3A;SH3BP4;AHR;SLIT2;PKD2;RYR3;RAPGEF3;HCN1
Regulation Of Neuron Apoptotic Process (GO:0043523)	12/105	0.0849723	0.965698	1.62804972290301	4.01384167838716	BACE1;EPHA7;EGLN3;SET;GRM4;GDNF;CITED1;BDNF;AKT1S1;IL6ST;FOXO3;CDK5R1
Monoatomic Cation Channel Activity (GO:0005261)	12/105	0.0849723	0.982896	1.62804972290301	4.01384167838716	RYR1;SLC24A2;SCNN1G;CALHM2;CHRNA7;PIEZO2;PIEZO1;KCNK16;NOX5;PKD2;TRPM3;HCN1
Nervous System Development R-HSA-9675108	49/545	0.0850327	0.999865	1.25090470958681	3.08312911524997	NRP2;RPL32;AP2A1;ARHGAP35;RND1;RPS4X;PSMD7;SYNGAP1;RPS6KA2;HOXA2;SPTAN1;EPHA5;EPHA7;NCBP2;RPL22;ITGA1;UNC5C;ANK2;RNASE1;DNM2;CACNB3;KCNQ3;DCX;RPL29;PFN1;DSCAML1;DOCK1;ITGA9;PSMD11;SEMA3A;SDC2;KALRN;PSMB6;EFNB2;SDCBP;EFNB3;RRAS;CLTCL1;AP2S1;ABL1;MAPK1;FYN;SLIT3;SLIT2;NFASC;DLG1;GDNF;COL9A3;CDK5R1
Cardiac Muscle Tissue Development (GO:0048738)	7/52	0.0854755	0.965698	1.96110353190844	4.82338423092217	KDM6B;SGCD;PRMT1;ZFPM1;BMP7;SGCZ;SGCG
Mouth Ulcers	7/52	0.0854755	0.680535	1.96110353190844	4.82338423092217	LINC01100;SCHIP1;POLR1HASP;LINC02009;HLA-A;TRIM31;LTF
PMC6923859 F3	7/52	0.0854755	0.772861	1.96110353190844	4.82338423092217	BMP4;HGF;WNT7B;ILK;WNT1;GLI3;PLD2
PMC3432190 F2	7/52	0.0854755	0.772861	1.96110353190844	4.82338423092217	ALDH4A1;BDNF;FYN;ACTN4;PRODH;KLF4;PLD2
PMC7825356-8844261.f3.docx-72-MAP3K9 MAP3K9	7/52	0.0854755	0.999995	1.96110353190844	4.82338423092217	ERCC6L;TMEM167A;TMEM67;MUC13;SYNJ2;SVIP;PTPRG
BMP receptor signaling	6/42	0.0855102	0.999939	2.1007725516928	5.16605179749712	BMP4;AHSG;MAPK1;BMPR1B;CHRDL1;BMP7
Cowden Syndrome	6/42	0.0855102	0.984226	2.1007725516928	5.16605179749712	APAF1;PTEN;MAPK1;FOXO3;TP53;FOXO1
Branching Morphogenesis Of An Epithelial Tube (GO:0048754)	6/42	0.0855102	0.965698	2.1007725516928	5.16605179749712	BMP4;NELL1;CITED1;GDNF;SLIT2;PKD2
Regulation Of Axonogenesis (GO:0050770)	6/42	0.0855102	0.965698	2.1007725516928	5.16605179749712	TIAM2;EFNB3;PTEN;SLIT2;PAK3;ARHGAP35
Oily Fish Consumption	6/42	0.0855102	0.680535	2.1007725516928	5.16605179749712	KIRREL3;CARMIL1;LRRTM4;LRRN2;LINC01414;TOX
BMP receptor signaling Homo sapiens 2a3c66e7-618e-11e5-8ac5-06603eb7f303	6/42	0.0855102	0.991991	2.1007725516928	5.16605179749712	BMP4;AHSG;MAPK1;BMPR1B;CHRDL1;BMP7
PMC5509726 F3	6/42	0.0855102	0.772861	2.1007725516928	5.16605179749712	PERP;ILK;ST3GAL6;PPARG;B4GALT4;HK1
PMC5559174 F4	6/42	0.0855102	0.772861	2.1007725516928	5.16605179749712	TUBA1B;RARB;PPARG;FOXO3;TP53;SIRT2
PMC10247733-41408 2023 863 MOESM2 ESM.pdf-64-CAMK2D CAMK2D	6/42	0.0855102	0.999995	2.1007725516928	5.16605179749712	CAND2;CAPN12;CAPN6;CAPRIN2;CAMTA2;CAPS2
Metabolic Reprogramming In Pancreatic Cancer WP5220	6/42	0.0855102	0.995023	2.1007725516928	5.16605179749712	PDHA1;GOT1;SLC1A5;LDLR;TP53;HK1
MARK2	67/771	0.0881931	0.99952	1.20641750452606	2.92945496385096	GABRB3;ERCC6L;TENM4;PRAG1;USP31;WWC1;OSBPL11;SIPA1L2;ELK3;PPIP5K1;PIEZO2;PIEZO1;KIF1C;SPEG;SPTAN1;ENDOG;MME;MINK1;SHROOM3;NOSIP;ANK2;RC3H2;PARD3B;NCOR2;CDC42EP4;HECW2;MAP1A;PRKD2;KANK2;SLC24A2;KMT2D;PLEKHH2;ANKRD55;MRPL17;IQGAP2;FOXO3;KALRN;NOL4;FOXO1;ADCY6;RPAP3;HDAC7;SNX4;SDCBP;PDE11A;ADGRG2;PDZD2;EPB41L3;ABL1;SH3BP4;PAK6;ZC3H18;ECT2;TP53I11;NOP56;CDK17;RANBP2;CDK18;RPA1;MYO9A;ARHGAP31;THEMIS2;…
S-6-hydroxywarfarin Levels	14/128	0.0885462	0.680535	1.54985991366353	3.75721830709759	ZFHX3;STEAP1B;VDR;ABCA4;MINK1;MLLT3;TIAM2;HINT1;LYRM7;NAA16;TOX;LINC00378;PRKG1;ST6GALNAC5
PMC3858477 F4	10/84	0.0887997	0.772861	1.70447617816039	4.12717124207714	NEUROD4;PDCD11;CDC37;NEFL;RAB38;EVX1;FGF13;F3;ETV4;RND1
Acute Viral Myocarditis WP4298	10/84	0.0887997	0.995023	1.70447617816039	4.12717124207714	SGCD;ENDOG;CD80;ABL1;ILK;MAPK1;IL12A;FYN;DMD;SGCG
Acetylcholine biosynthesis	2/7	0.0888288	0.999939	5.03657375934738	12.1937691195454	PDHA2;PDHA1
Homologous DNA pairing and strand exchange	2/7	0.0888288	0.999939	5.03657375934738	12.1937691195454	RPA1;RPA2
Internal ribosome entry pathway	2/7	0.0888288	0.999939	5.03657375934738	12.1937691195454	EIF4A1;EIF4G3
[truncated: 35,280 more rows]

## Sheet: Supplementary table 10
CHR	SNP	UNADJ	GC	BONF adj p	Allele1	Freq_Affected	Freq_Unaffected	P_noethnicitycorr	SNPrs	Chromosome pos	chr	200kb-less	200kb more	assembly
[truncated: 1,000 more rows]

[truncated: 6 more sheets: Supplementary table 11, Supplementary table 12, Supplementary table 13, Supplementary table 14, Supplementary table 15, Supplementary table 16]
